# Supplementary material for: Prognostic factors for streptococcal toxic shock syndrome: systematic review and meta-analysis
Source: PubMed Central journal article supplement — BMJ Open. 2022 Dec 1;12(12):e063023. doi: 10.1136/bmjopen-2022-063023 (PMC9716873; doi:10.1136/bmjopen-2022-063023), 2022-12-01
Supplement: bmjopen-2022-063023.draft_revisions.pdf [file bmjopen-2022-063023.draft_revisions.pdf]

# BMJ Open

BMJ Open is committed to open peer review. As part of this commitment we make the peer review history of every article we publish publicly available.

When an article is published we post the peer reviewers' comments and the authors' responses online. We also post the versions of the paper that were used during peer review. These are the versions that the peer review comments apply to.

The versions of the paper that follow are the versions that were submitted during the peer review process. They are not the versions of record or the final published versions. They should not be cited or distributed as the published version of this manuscript.

BMJ Open is an open access journal and the full, final, typeset and author-corrected version of record of the manuscript is available on our site with no access controls, subscription charges or pay-per-view fees (<http://bmjopen.bmj.com>).

If you have any questions on BMJ Open's open peer review process please email [info.bmjopen@bmj.com](mailto:info.bmjopen@bmj.com)

# BMJ Open

## PROGNOSTIC FACTORS FOR STREPTOCOCCAL TOXIC SHOCK SYNDROME: SYSTEMATIC REVIEW AND META-ANALYSIS

|                               |                                                                                                                                                                                                                                                                                                                                                                                                                                                                                                                                                                                    |
|-------------------------------|------------------------------------------------------------------------------------------------------------------------------------------------------------------------------------------------------------------------------------------------------------------------------------------------------------------------------------------------------------------------------------------------------------------------------------------------------------------------------------------------------------------------------------------------------------------------------------|
| Journal:                      | <i>BMJ Open</i>                                                                                                                                                                                                                                                                                                                                                                                                                                                                                                                                                                    |
| Manuscript ID                 | bmjopen-2022-063023                                                                                                                                                                                                                                                                                                                                                                                                                                                                                                                                                                |
| Article Type:                 | Original research                                                                                                                                                                                                                                                                                                                                                                                                                                                                                                                                                                  |
| Date Submitted by the Author: | 19-Mar-2022                                                                                                                                                                                                                                                                                                                                                                                                                                                                                                                                                                        |
| Complete List of Authors:     | Bartoszko, Jessica; McMaster University, Elias, Zeyad; University of Toronto, Department of Medicine Rudziak, Paulina; Western University, Department of Biology Lo, Carson KL; Hamilton, Department of Medicine Thabane, Lehana; Hamilton, Department of Health Research Methods, Evidence and Impact; Hamilton, Departments of Anesthesia and Pediatrics<br>Mertz, Dominik; Hamilton, Department of Health Research Methods, Evidence and Impact; Hamilton, Department of Medicine<br>Loeb, Mark; Hamilton, Department of Health Research Methods, Evidence and Impact; Hamilton |
| Keywords:                     | Epidemiology < INFECTIOUS DISEASES, EPIDEMIOLOGY, BACTERIOLOGY                                                                                                                                                                                                                                                                                                                                                                                                                                                                                                                     |
|                               |                                                                                                                                                                                                                                                                                                                                                                                                                                                                                                                                                                                    |

SCHOLARONE™  
Manuscripts

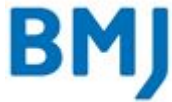

I, the Submitting Author has the right to grant and does grant on behalf of all authors of the Work (as defined in the below author licence), an exclusive licence and/or a non-exclusive licence for contributions from authors who are: i) UK Crown employees; ii) where BMJ has agreed a CC-BY licence shall apply, and/or iii) in accordance with the terms applicable for US Federal Government officers or employees acting as part of their official duties; on a worldwide, perpetual, irrevocable, royalty-free basis to BMJ Publishing Group Ltd ("BMJ") its licensees and where the relevant Journal is co-owned by BMJ to the co-owners of the Journal, to publish the Work in this journal and any other BMJ products and to exploit all rights, as set out in our [licence](#).

The Submitting Author accepts and understands that any supply made under these terms is made by BMJ to the Submitting Author unless you are acting as an employee on behalf of your employer or a postgraduate student of an affiliated institution which is paying any applicable article publishing charge ("APC") for Open Access articles. Where the Submitting Author wishes to make the Work available on an Open Access basis (and intends to pay the relevant APC), the terms of reuse of such Open Access shall be governed by a Creative Commons licence – details of these licences and which [Creative Commons](#) licence will apply to this Work are set out in our licence referred to above.

Other than as permitted in any relevant BMJ Author's Self Archiving Policies, I confirm this Work has not been accepted for publication elsewhere, is not being considered for publication elsewhere and does not duplicate material already published. I confirm all authors consent to publication of this Work and authorise the granting of this licence.

1  
2  
3 **PROGNOSTIC FACTORS FOR STREPTOCOCCAL TOXIC SHOCK SYNDROME:**  
4 **SYSTEMATIC REVIEW AND META-ANALYSIS**  
5  
6  
7

8 Jessica J Bartoszko HBSc<sup>1</sup>, Zeyad Elias BSc<sup>2</sup>, Paulina Rudziak BSc(c)<sup>3</sup>, Carson KL Lo MD<sup>4</sup>,  
9 Lehana Thabane PhD<sup>1,5,6</sup>, Dominik Mertz MD<sup>1,4,7,8</sup>, Mark Loeb MD<sup>1,7,8</sup>  
10  
11

12  
13 <sup>1</sup> Department of Health Research Methods, Evidence and Impact, McMaster University,  
14 Hamilton, Ontario, Canada  
15

16  
17 <sup>2</sup> Department of Medicine, University of Toronto, Toronto, Ontario, Canada  
18

19 <sup>3</sup> Department of Biology, Western University, London, Ontario, Canada  
20

21 <sup>4</sup> Division of Infectious Diseases, Department of Medicine, McMaster University, Hamilton,  
22 Ontario, Canada  
23

24 <sup>5</sup> Departments of Anesthesia and Pediatrics, McMaster University, Hamilton, Ontario, Canada  
25

26 <sup>6</sup> Biostatistics Unit, St. Joseph's Healthcare Hamilton, Hamilton, Ontario, Canada  
27

28 <sup>7</sup> Institute for Infectious Disease Research, McMaster University, Hamilton, Ontario, Canada  
29

30 <sup>8</sup> Department of Pathology and Molecular Medicine, McMaster University, Hamilton, Ontario,  
31 Canada  
32

33  
34 Corresponding author:  
35

36 Dr. Mark Loeb, [loebm@mcmaster.ca](mailto:loebm@mcmaster.ca), McMaster University, Hamilton, Canada, L8S 4L8  
37  
38

39 Key words: streptococcal toxic shock syndrome (STSS); systematic review; meta-analysis  
40  
41

42  
43 Word count: 4151  
44  
45  
46  
47  
48  
49  
50  
51  
52  
53  
54  
55  
56  
57  
58  
59  
60

## ABSTRACT

**Objective:** To quantify the prognostic effects of demographic and modifiable factors in streptococcal toxic shock syndrome (STSS).

**Methods and analysis:** We searched MEDLINE and EMBASE from inception to 6 August 2021, along with CINAHL from inception to 16 September 2021 and citations of included studies. Pairs of reviewers screened potentially eligible studies of patients with GAS-induced STSS that quantified the association between at least one prognostic factor and outcome of interest. We performed random-effects meta-analysis after duplicate data extraction and risk of bias assessments. We rated the certainty of evidence using the GRADE approach.

**Results:** One randomized trial and 39 observational studies were eligible (n=1,914 patients). Low certainty evidence suggests the odds of mortality may be significantly reduced by clindamycin treatment (n=144; odds ratio [OR] 0.14, 95% confidence interval [CI] 0.06 to 0.37) and within clindamycin-treated STSS patients, intravenous immunoglobulin (IVIG) treatment (n=188; OR 0.34, 95% CI 0.15 to 0.75), and increased in patients  $\geq 65$  years when compared to patients 18-64 years (n=396; OR 2.37, 95% CI 1.47 to 3.84). We are uncertain whether non-steroidal anti-inflammatory drugs (NSAIDs) increased the odds of mortality (n=50; OR 4.14, 95% CI 1.13 to 15.14; very low certainty). Results failed to show a significant association between any other prognostic factor and outcome combination (very low to low certainty evidence) and no studies quantified the association between a prognostic factor and morbidity post-infection in STSS survivors.

**Conclusions:** STSS mortality may be modified with clindamycin and within clindamycin-treated patients, IVIG. Future research should focus on morbidity post-infection in STSS survivors.

## STRENGTHS AND LIMITATIONS OF THIS STUDY

- Strengths of this review include its systematic and explicit search of the literature, capture of a wide breadth of patient-important outcomes within and outside of critical care and the use of meta-analysis to increase statistical power in studying relationships between prognostic factors and outcomes in STSS patients.
- These strengths directly address limitations of a narrative synthesis of STSS prognosis restricted to the critical care setting.
- In the absence of large cohort studies and randomized trials, conclusions for STSS prognosis in this review are limited by very low to low certainty evidence.
- A limitation of the evidence is the lack of long-term outcome data reported, including morbidity post-infection in STSS survivors.

## Introduction

Streptococcal toxic shock syndrome (STSS) is an acute and severe life-threatening complication of predominantly invasive group A *Streptococcus* (GAS) infections. STSS is relatively uncommon, but is fatal [1]. Using US data from 2000 to 2004, the Center for Diseases Control and Prevention estimated an annual incidence rate of 0.2 cases per 100,000 people and a fatality rate of 36% [2]. STSS has important consequences for morbidity as well, in which patients may require radical surgical debridement, and patients with organ failure may have permanent respiratory and renal insufficiency [1].

Although extensive multidisciplinary clinical management efforts by intensivists, infectious disease specialists, and surgeons have curbed STSS all-cause mortality [1], data on the natural history of long-term sequelae in surviving patients, such as renal, respiratory and neuropsychiatric complications, are sparse [1-4]. Published studies of prognostic and treatment factors for STSS have consistently focused on associations with all-cause mortality [5-14], with few reporting on outcomes capturing the morbidity post-infection in STSS survivors [7, 12]. Furthermore, a thorough and systematic review to corroborate this evidence is lacking. A narrative review of STSS was limited by the lack of a systematic or explicit search of the literature, it included studies that were only narratively synthesized, and the focus was limited to studies within a critical care setting [1].

Understanding prognosis of STSS is important for patients, clinicians, and healthcare decision makers. We conducted a systematic review to summarize the prognostic and treatment factors, and outcomes of STSS. We aimed to capture a wide breadth of patient-important outcomes with follow up that included both short- and long-term outcomes within and outside of critical care.

## Materials and methods

We registered a protocol for the present systematic review and meta-analysis with PROSPERO (CRD42020166961) [15, 16]. We report this systematic review and meta-analysis following the guidelines of the Preferred Reporting Items for Systematic Reviews and Meta-Analyses (PRISMA) and Meta-analyses of Observational Studies in Epidemiology (MOOSE) checklists [17, 18]. Decisions regarding criteria for study inclusion, search methods for identification of

1  
2  
3 studies, data collection, risk of bias, evaluation of the certainty of evidence and analysis were  
4 established a priori.  
5  
6  
7

### 8 **Search strategy and selection criteria**

9  
10 We searched MEDLINE (OVID interface, Epub Ahead of Print, In-Process & Other Non-  
11 Indexed Citations, 1946 to 6 August 2021) and EMBASE (OVID interface, 1974 to 6 August  
12 2021) from inception to 6 August 2021, with no restrictions on publication date. We searched the  
13 Cumulative Index to Nursing And Allied Health Literature (CINAHL), excluding MEDLINE  
14 records, from inception to 16 September 2021. We applied search filters for randomized  
15 controlled trials and non-randomized studies (cohort, case-control and case series with at least 2  
16 STSS patients) [19, 20], and tailored search strategies to each database. We restricted included  
17 studies to the English language to facilitate screening of full-texts [21, 22] and searched citations  
18 of included studies to minimize the risk of failing to include relevant studies.  
19  
20  
21  
22  
23  
24  
25  
26

27 We included studies of randomized and non-randomized designs that reported the association of  
28 at least one prognostic factor of interest on at least one outcome of interest, and compared GAS-  
29 induced STSS patients with the prognostic factor of interest (i.e. exposed) to GAS-induced STSS  
30 patients without the prognostic factor of interest (i.e. unexposed). Studies of patients with  
31 microbiologically confirmed STSS, probable cases of STSS and patients with clinical evidence  
32 of STSS as defined by study authors and generally consistent with the below criteria were  
33 eligible [3, 23]. Clinical evidence of STSS included hypotension and at least two of the  
34 following: renal impairment, coagulopathy, liver function abnormality, acute respiratory distress  
35 syndrome, generalized erythematous macular rash (with desquamation), soft-tissue necrosis  
36 (including necrotizing fasciitis, myositis or gangrene), or meningitis. Probable cases of STSS  
37 were defined as meeting clinical evidence with GAS isolated from a non-sterile site (e.g. throat,  
38 sputum, superficial skin lesion) or antigen detected. Confirmed cases of STSS were defined as  
39 meeting clinical evidence with GAS isolated from a sterile site (e.g. blood, cerebrospinal fluid,  
40 deep tissue specimen taken during surgery) [3, 23]. Demographic, comorbidity, infection,  
41 modifiable and process variables were prognostic factors of interest. Informed by clinical  
42 expertise in the review team, we selected outcomes based on importance to patients. Further, we  
43 aimed to capture the long-term sequelae in patients surviving STSS [1, 2, 4]. We chose the  
44  
45  
46  
47  
48  
49  
50  
51  
52  
53  
54  
55  
56  
57  
58  
59  
60



1  
2  
3 following outcomes of interest: (time to) mortality, hospital length-of-stay, pediatric (P)  
4 intensive care unit (ICU) admission, (P)ICU length-of-stay, mechanical ventilation, duration of  
5 mechanical ventilation, (time to) clinical cure/improvement or resolution of shock, change in  
6 Sequential Organ Failure Assessment (SOFA) score from baseline, functional status (e.g.  
7 physical component summary (PCS) score on the 36-item short form health survey (SF-36)) and  
8 health related quality of life (HRQoL). We also extracted on cost outcomes, which are relevant  
9 to hospital and patient payees.

10  
11  
12 We excluded case reports and conference abstracts, and studies in which the population was less  
13 than 80% GAS-induced STSS cases (i.e. toxic shock syndrome of bacterial aetiologies other than  
14 GAS made up more than 20% of the study population). Because prognostic evidence in STSS  
15 patients is scarce [1, 2, 4], we did not apply any restrictions based on analytical method (e.g.  
16 conducting an adjusted, multivariable analysis) or sample size.

17  
18  
19 Using a systematic review software, Rayyan [24], following training and calibration exercises,  
20 pairs of reviewers independently screened all titles and abstracts, followed by full-texts of  
21 records that were identified as potentially eligible. When necessary, consensus was reached  
22 through discussion between the review pair, and arbitration by a senior co-investigator in the  
23 absence of consensus.

### 24 25 26 27 28 29 30 31 32 33 34 35 36 37 38 **Data analysis**

39 For each eligible study, pairs of reviewers extracted data independently using a standardized,  
40 pilot tested data extraction form. Reviewers collected information on study characteristics (study  
41 design as defined by study authors, sample size, country), patient characteristics (age, sex),  
42 disease characteristics (confirmed vs probable STSS, presence of necrotizing fasciitis),  
43 prognostic factors and outcomes of interest (means or medians and measures of variability for  
44 continuous outcomes and the proportion of participants who experienced an event for  
45 dichotomous outcomes). If multiple time points were reported for outcomes of interest, we  
46 extracted all time points. To minimize risk of confounding associated with prognostic effect  
47 estimates on dichotomous outcomes in non-randomized studies, we preferentially extracted  
48 adjusted odds ratios (ORs) and corresponding 95% confidence intervals (CI) over proportions  
49  
50  
51  
52  
53  
54  
55  
56  
57  
58  
59  
60

1  
2  
3 when both were reported. We used the proportions to calculate crude ORs when no adjusted ORs  
4 were provided. Reviewers resolved discrepancies by discussion and, when necessary, with  
5 adjudication by a third party.  
6  
7

8  
9  
10 Following training and calibration exercises, reviewers, independently and in duplicate, used a  
11 modified version of the Quality in Prognosis Studies (QUIPS) tool to rate each prognostic factor  
12 and outcome combination at low, moderate or high risk of bias overall [25]. Based on  
13 prespecified sets of questions, we assessed risk of bias across the following domains:  
14 participation, attrition, prognostic factor measurement, outcome measurement, confounding, and  
15 statistical analysis and reporting. For studies addressing more than one prognostic factor and  
16 outcome combination, we reported the highest risk of bias rating among the prognostic factor  
17 and outcome combinations within a study for each domain. We rated overall study risk of bias as  
18 low if the study was prospective and five or more domains were assessed as low risk of bias, and  
19 high if two or more domains were assessed as high risk of bias. All other studies were rated as  
20 moderate risk of bias overall. Due to high risk of selection bias and residual confounding, we  
21 rated all case series as high risk of bias overall. Reviewer pairs resolved discrepancies by  
22 discussion and, when needed, with adjudication by a senior co-investigator.  
23  
24  
25  
26  
27  
28  
29  
30  
31  
32  
33

34 Pairs of reviewers used a modified version of the grading of recommendations, assessment,  
35 development, and evaluation (GRADE) approach to independently assess the certainty of  
36 prognostic evidence for each meta-analysed outcome. Criteria for rating the certainty for each  
37 prognostic factor and outcome as high, moderate, low, or very low, included considerations of  
38 risk of bias, inconsistency, indirectness, size and precision of the association and publication bias  
39 [26, 27]. Judgments of imprecision for this systematic review were made using a minimally  
40 contextualised approach. This approach considers whether confidence intervals include the null  
41 effect. The supplementary file presents detailed guidance on the certainty of the evidence  
42 assessment. To facilitate interpretation of the results in which the summary measure was an OR,  
43 we used the median event rate in the reference group of studies reporting proportions to calculate  
44 baseline risks and subsequently calculated absolute effects. GRADE evidence summaries  
45 (Summary of Findings tables) were generated in the MAGIC Authoring and Publication Platform  
46 ([www.magicapp.org](http://www.magicapp.org)).  
47  
48  
49  
50  
51  
52  
53  
54  
55  
56  
57  
58  
59  
60

1  
2  
3  
4  
5 When at least two included studies reported on the same prognostic factor and outcome, we  
6 conducted DerSimonian and Laird random-effects meta-analyses using the *metafor* package in R  
7 version 4.0.4 (R Studio, Boston, MA, USA) [28]. We summarised the effects of prognostic  
8 factors on dichotomous outcomes using ORs and corresponding 95% CI, and on continuous  
9 outcomes using mean differences and corresponding 95% CI. For prognostic factor and  
10 dichotomous outcome combinations in which every patient in the reference arm experienced the  
11 outcome, we summarised the effects by directly calculating risk differences and corresponding  
12 95% CI. We set the criterion for statistical significance at  $\alpha = 0.05$ . Visual inspection of  
13 forest plots and the chi-square test were performed to evaluate heterogeneity. We interpreted an  
14  $I^2$  statistic value of 0%-40%, 30%-60%, 50%-90%, or 75%-100% as not likely important,  
15 moderate, substantial, or considerable heterogeneity, respectively [29]. When inconsistent  
16 magnitudes and directions of summary estimates were observed upon visual inspection of the  
17 forest plots, and the chi-square test was significant, we interpreted heterogeneity as more  
18 important (i.e. we reported the interpretation corresponding to the higher limit in overlapping  $I^2$   
19 statistic values) [29]. For meta-analyses of continuous outcomes, we imputed means and  
20 standard deviations for studies reporting medians and (interquartile) ranges, respectively.  
21  
22  
23  
24  
25  
26  
27  
28  
29  
30  
31  
32  
33

34 Patient-level data from case-series were aggregated when possible to enable comparative  
35 analysis via meta-analysis. We planned to perform regression analyses for studies for which age  
36 was reported at the patient level to generate aggregate ORs that could be used in meta-analysis  
37 when the study had at least 10 observations for continuous outcomes and 10 events for  
38 dichotomous outcomes; however, no study met the sample size or event number requirements.  
39 Further, scarcity and variability of data precluded our plan to narratively synthesize the evidence  
40 from included studies for which meta-analysis of a prognostic factor and outcome combination  
41 was not possible.  
42  
43  
44  
45  
46  
47  
48  
49

50 The analysis plan included performing subgroup analyses of STSS patients treated with  
51 clindamycin vs no clindamycin, STSS patients with necrotizing fasciitis vs without necrotizing  
52 fasciitis, age (0 to 17 years old vs 18 to 64 years old vs 65 years old or older), sex (male vs  
53  
54  
55  
56  
57  
58  
59  
60

1  
2  
3 female) and risk of bias (high vs moderate vs low) when at least two studies were present for  
4 each subgroup.  
5  
6  
7

## 8 **Patient and public involvement**

9  
10 It was not appropriate or possible to involve patients or the public in the design, or conduct, or  
11 reporting, or dissemination plans of our research.  
12  
13

## 14 **Results**

15  
16 After screening 25,397 titles and abstracts and 282 full texts, 40 studies that reported on the  
17 association between at least one prognostic factor and outcome of interest in STSS patients  
18 proved eligible (Figure 1). All but one study (39/40, 98%) were non-randomized. Eligible studies  
19 were published between 1989 and 2021, ranged in sample size from 2 to 476, included 1,914  
20 STSS patients in total and were conducted in 22 different countries, most commonly in the  
21 United States (15/40, 38%).  
22  
23  
24  
25  
26  
27  
28

29 Table 1 describes the characteristics of included studies reporting on the association of at least  
30 one prognostic factor and outcome of interest. The supplementary data includes additional study  
31 characteristics for each study. Of the 40 included studies, 28 (70%) reported on demographic  
32 prognostic factors of interest, 5 (13%) medical history of being immunocompromised, 11 (28%)  
33 early disease characteristics, and 16 (40%) treatment. Of the dichotomous outcomes, mortality  
34 was most commonly reported (35/40, 88%), followed by (P)ICU admission (10/40, 25%),  
35 clinical cure or improvement (8/40, 20%) and need for mechanical ventilation (6/40, 15%). Few  
36 studies reported on hospital (3/40, 8%) and ICU length-of-stay (2/40, 5%). Two studies reported  
37 on time to mortality in days [7, 30]; however, only one reported sufficient data precluding meta-  
38 analysis [7]. One study each reported on cost [14], change in SOFA score [7], time to clinical  
39 improvement or resolution of shock [7] and duration of mechanical ventilation [10] precluding  
40 meta-analysis for these continuous outcomes. No studies quantified the association between a  
41 prognostic factor and functional status or health related quality of life outcomes. A multivariable  
42 analysis was conducted in two (5%) of the included studies [10, 11]. A total of 19 of the 40  
43 studies were cohort studies (authors reported on at least one comparative analysis), 18 were case  
44 series (authors did not report a comparative analysis) and 2 were case-control studies. To meta-  
45  
46  
47  
48  
49  
50  
51  
52  
53  
54  
55  
56  
57  
58  
59  
60

analyse the data, we aggregated the data from the individual patients the case series reported on. Further, we pooled the one randomized study [7] with non-randomized studies in meta-analyses and included patients receiving intravenous or intramuscular IVIG from one non-randomized study [31].

**Table 1. Study characteristics. Values are numbers (percentages) of studies unless stated otherwise.**

| Characteristics                 | (40 studies, 1914 patients) |
|---------------------------------|-----------------------------|
| Range of publication year       | 1989 to 2021                |
| Median (IQR) No. of patients    | 11 (5 to 29)                |
| Geographical region:            |                             |
| North America                   | 19 (48)                     |
| Europe                          | 14 (35)                     |
| Central/South America           | 0 (0)                       |
| Asia                            | 3 (7)                       |
| Other                           | 4 (10)                      |
| Study design:                   |                             |
| Randomized trial                | 1 (2)                       |
| Cohort                          | 19 (48)                     |
| Case-control                    | 2 (5)                       |
| Case-series                     | 18 (45)                     |
| Case definition:                |                             |
| No. (%) Probable STSS patients  | 115 (6)                     |
| No. (%) Confirmed STSS patients | 223 (12)                    |
| Prognostic factor type:         |                             |
| Demographic                     | 28 (70)                     |
| Medical history                 | 5 (13)                      |
| Early disease                   | 11 (28)                     |
| Treatment                       | 16 (40)                     |

IQR=interquartile range

STSS=streptococcal toxic shock syndrome

Medical history included prognostic variable: immunocompromised

Early disease included prognostic variables: necrotizing fasciitis, acute renal failure

The supplementary material includes the forest plots depicting the studies included in the meta-analysis of each prognostic factor-outcome combination. It also includes the list of studies

reporting on prognostic factor-outcome combinations of interest that were not eligible for any meta-analysis, along with the reasons for exclusion from meta-analysis.

### Risk of bias in included studies

Table 2 presents the risk of bias assessment of the 40 included studies. The majority of studies were rated as high risk of bias overall owing to residual confounding and lack of adjustment for confounding in statistical analyses (36/40, 90%) [2, 5, 6, 10, 30-61]. Three studies were rated at moderate risk of bias overall [7, 14, 62] and one at low risk of bias overall [11].

**Table 2. Risk of bias assessment of included studies.**

| Author                  | Study participation | Study Attrition | Prognostic Factor Measurement | Outcome Measurement | Study Confounding | Statistical Analysis and Presentation Summary | Overall Risk of Bias |
|-------------------------|---------------------|-----------------|-------------------------------|---------------------|-------------------|-----------------------------------------------|----------------------|
| Abuhammour 2004         | Low                 | Low             | Low                           | Low                 | High              | High                                          | High                 |
| Adalat 2014             | Low                 | High            | High                          | Low                 | High              | High                                          | High                 |
| Al-Ajmi 2012            | NA                  | NA              | NA                            | NA                  | NA                | NA                                            | High                 |
| Barnham 2002            | NA                  | NA              | NA                            | NA                  | NA                | NA                                            | High                 |
| Bernaldo de Quiros 1997 | Low                 | Low             | Low                           | Low                 | High              | High                                          | High                 |
| Brogan 1995             | NA                  | NA              | NA                            | NA                  | NA                | NA                                            | High                 |
| Butragueno Laiseca 2017 | NA                  | NA              | NA                            | NA                  | NA                | NA                                            | High                 |
| Carapetis 1995          | NA                  | NA              | NA                            | NA                  | NA                | NA                                            | High                 |
| Carapetis 2014          | Low                 | Low             | Low                           | Low                 | High              | High                                          | High                 |
| Cimolai 1992            | NA                  | NA              | NA                            | NA                  | NA                | NA                                            | High                 |
| Cook 2021               | Low                 | Low             | Low                           | Low                 | High              | High                                          | High                 |
| Cowan 1994              | NA                  | NA              | NA                            | NA                  | NA                | NA                                            | High                 |
| Crum 2004               | NA                  | NA              | NA                            | NA                  | NA                | NA                                            | High                 |
| Dahl 2002               | NA                  | NA              | NA                            | NA                  | NA                | NA                                            | High                 |
| Darenberg 2003          | Low                 | Moderate        | Low                           | Moderate            | Low               | Low                                           | Moderate             |
| Donaldson 1993          | NA                  | NA              | NA                            | NA                  | NA                | NA                                            | High                 |
| Erdem 2004              | NA                  | NA              | NA                            | NA                  | NA                | NA                                            | High                 |

|                  |          |          |          |          |          |          |          |
|------------------|----------|----------|----------|----------|----------|----------|----------|
| Eriksson 1999    | Low      | Low      | Low      | Low      | High     | High     | High     |
| Forni 1995       | NA       | NA       | NA       | NA       | NA       | NA       | High     |
| Fronhoffs 2000   | NA       | NA       | NA       | NA       | NA       | NA       | High     |
| Hasegawa 2004    | Low      | Low      | Moderate | Low      | High     | High     | High     |
| Hayata 2021      | Low      | Low      | Low      | Low      | High     | High     | High     |
| Huang 2001       | NA       | NA       | NA       | NA       | NA       | NA       | High     |
| Kansal 2000      | Moderate | Low      | Moderate | Low      | High     | High     | High     |
| Kaul 1999        | Low      | Low      | Low      | Low      | High     | High     | High     |
| Linder 2017      | Low      | Moderate | Low      | Moderate | High     | High     | High     |
| Linner 2014      | Low      | Low      | Low      | Low      | Moderate | Low      | Low      |
| Luca-Harari 2009 | Low      | High     | Low      | Low      | High     | High     | High     |
| Nelson 2016      | Low      | Low      | Low      | Low      | High     | High     | High     |
| O'Loughlin 2007  | Low      | Low      | Low      | Low      | High     | High     | High     |
| Page 2011        | Low      | Low      | Low      | Low      | Moderate | High     | Moderate |
| Safar 2011       | Low      | Low      | Low      | Low      | High     | High     | High     |
| Schwartz 1992    | NA       | NA       | NA       | NA       | NA       | NA       | High     |
| Shah 2009        | Low      | High     | Low      | Low      | Moderate | Moderate | Moderate |
| Sriskandan 2000  | Moderate | Moderate | High     | Low      | High     | High     | High     |
| Stegmayr 1992    | NA       | NA       | NA       | NA       | NA       | NA       | High     |
| Stevens 1989     | NA       | NA       | NA       | NA       | NA       | NA       | High     |
| Stockmann 2012   | Low      | Low      | Low      | Low      | High     | High     | High     |
| Tagini 2017      | NA       | NA       | NA       | NA       | NA       | NA       | High     |
| Zachariadou 2013 | Low      | Low      | Low      | Low      | High     | High     | High     |

NA, Not Applicable because case-series study design and rated at high risk of bias.

### Prognostic factors for mortality

Eleven prognostic factors from 31 studies including 1339 patients were eligible for analysis (table 3, supplementary data). Low certainty evidence suggests that treatment with clindamycin antibiotic may reduce the odds of mortality (n=144, OR 0.14, 95% CI 0.06 to 0.37). Within

clindamycin-treated STSS patients, IVIG may also reduce the odds of mortality (n=188, OR 0.34, 95% CI 0.15 to 0.75; low certainty of evidence); however, we are uncertain whether IVIG treatment reduces the odds of mortality in all STSS patients regardless of concurrent clindamycin treatment (n=365, OR 0.37, 95% CI 0.17 to 0.80; very low certainty of evidence). Patients  $\geq 65$  years compared to patients 18-64 years may have increased odds of mortality (n=396, OR 2.37, 95% CI 1.47 to 3.84; low certainty of evidence); however, we are less certain whether the same is true for patients  $\geq 65$  years compared to patients  $< 18$  years (n=136, OR 10.66, 95% CI 1.28 to 88.57; very low certainty of evidence). We are also uncertain whether NSAIDs increase the odds of mortality (n=50, OR 4.14, 95% CI 1.13 to 15.14; very low certainty of evidence). Very low certainty evidence failed to show a significant association with any other prognostic factor and mortality in STSS patients: male vs female (n=76, OR 0.91, 95% CI 0.34 to 2.46), patients  $< 18$  years vs patients 18 to 64 years (n=694, OR 0.54, 95% CI 0.15 to 1.94), immunocompromised vs not immunocompromised (n=33, OR 1.65, 95% CI 0.33 to 8.26), necrotizing fasciitis vs no necrotizing fasciitis (n=840, OR 0.81, 95% CI 0.51 to 1.29), acute renal failure vs no acute renal failure (n=91, OR 2.50, 95% CI 0.97 to 6.42), hemodialysis vs no hemodialysis (n=42, OR 1.94, 95% CI 0.22 to 16.99) and any antibiotic vs no antibiotic (n=19, OR 0.48, 95% CI 0.05 to 4.76).

**Table 3. Summary of findings for prognostic factor – outcome meta-analyses.**

| Prognostic factor                          | Number of patients (studies) | Odds ratio (95% confidence interval) | Absolute effect estimates         |                             | GRADE: Certainty of the Evidence                                                               |
|--------------------------------------------|------------------------------|--------------------------------------|-----------------------------------|-----------------------------|------------------------------------------------------------------------------------------------|
|                                            |                              |                                      | Risk without prognostic factor    | Risk with prognostic factor |                                                                                                |
| <b>MORTALITY</b>                           |                              |                                      |                                   |                             |                                                                                                |
| Demographic                                |                              |                                      |                                   |                             |                                                                                                |
| Male vs Female                             | 76 (12)                      | 0.91 (0.34 to 2.46)                  | 250 per 1000<br>-17 (-148 to 201) | 233 per 1000                | <b>Very low</b><br>Due to very serious risk of bias and imprecision                            |
| <18 vs 18-64 years                         | 694 (5)                      | 0.54 (0.15 to 1.94)                  | 234 per 1000<br>-92 (-190 to 138) | 142 per 1000                | <b>Very low</b><br>Due to very serious risk of bias and imprecision, and serious inconsistency |
| $\geq 65$ vs <18 years                     | 136 (2)                      | 10.66 (1.28 to 88.57)*               | 50 per 1000<br>309 (13 to 773)    | 359 per 1000                | <b>Very low</b><br>Due to very serious risk of bias and serious imprecision                    |
| $\geq 65$ vs 18-64 years                   | 396 (2)                      | 2.37 (1.47 to 3.84)*                 | 193 per 1000<br>169 (67 to 286)   | 362 per 1000                | <b>Low</b><br>Due to very serious risk of bias                                                 |
| Medical history                            |                              |                                      |                                   |                             |                                                                                                |
| Immunocompromised vs Not Immunocompromised | 33 (4)                       | 1.65 (0.33 to 8.26)                  | 438 per 1000<br>125 (-233 to 428) | 563 per 1000                | <b>Very low</b><br>Due to very serious risk of bias and imprecision                            |
| Early disease                              |                              |                                      |                                   |                             |                                                                                                |
| Acute Renal Failure vs No Acute            | 91 (4)                       | 2.50 (0.97 to 6.42)                  | NA per 1000                       | NA per 1000                 | <b>Very low</b>                                                                                |



|                                                                           |          |                       |                     |                                                  |                                                                             |
|---------------------------------------------------------------------------|----------|-----------------------|---------------------|--------------------------------------------------|-----------------------------------------------------------------------------|
| <b>Renal Failure</b>                                                      |          |                       | 140 (-60 to 330)    | Due to very serious risk of bias and imprecision |                                                                             |
| <b>Necrotizing Fasciitis vs No Necrotizing Fasciitis</b>                  | 840 (10) | 0.81 (0.51 to 1.29)   | 347 per 1000        | 301 per 1000                                     | <b>Very low</b><br>Due to very serious risk of bias and imprecision         |
|                                                                           |          |                       | -46 (-134 to 60)    |                                                  |                                                                             |
| Treatment                                                                 |          |                       |                     |                                                  |                                                                             |
| <b>IVIG vs No IVIG (all STSS patients)</b>                                | 365 (9)  | 0.37 (0.17 to 0.80)*  | 231 per 1000        | 100 per 1000                                     | <b>Very low</b><br>Due to very serious risk of bias and serious imprecision |
|                                                                           |          |                       | -131 (-182 to -37)  |                                                  |                                                                             |
| <b>IVIG vs No IVIG (subset of STSS patients treated with clindamycin)</b> | 188 (6)  | 0.34 (0.15 to 0.75)*  | 300 per 1000        | 127 per 1000                                     | <b>Low</b><br>Due to serious risk of bias and imprecision                   |
|                                                                           |          |                       | -173 (-240 to -57)  |                                                  |                                                                             |
| <b>Any Antibiotic vs No Antibiotic</b>                                    | 19 (3)   | 0.48 (0.05 to 4.76)   | NA per 1000         | NA per 1000                                      | <b>Very low</b><br>Due to very serious risk of bias and imprecision         |
|                                                                           |          |                       | -120 (-490 to 260)  |                                                  |                                                                             |
| <b>Clindamycin vs No Clindamycin Antibiotic</b>                           | 144 (4)  | 0.14 (0.06 to 0.37)*  | 800 per 1000        | 359 per 1000                                     | <b>Low</b><br>Due to serious risk of bias and imprecision                   |
|                                                                           |          |                       | -441 (-606 to -203) |                                                  |                                                                             |
| <b>Hemodialysis vs No Hemodialysis</b>                                    | 42 (4)   | 1.94 (0.22 to 16.99)  | 107 per 1000        | 189 per 1000                                     | <b>Very low</b><br>Due to very serious risk of bias and imprecision         |
|                                                                           |          |                       | 82 (-81 to 564)     |                                                  |                                                                             |
| <b>NSAIDs vs No NSAIDs</b>                                                | 50 (4)   | 4.14 (1.13 to 15.14)* | 100 per 1000        | 315 per 1000                                     | <b>Very low</b><br>Due to very serious risk of bias and serious imprecision |
|                                                                           |          |                       | 215 (12 to 527)     |                                                  |                                                                             |
| ICU ADMISSION                                                             |          |                       |                     |                                                  |                                                                             |
| Demographic                                                               |          |                       |                     |                                                  |                                                                             |
| <b>Male vs Female</b>                                                     | 19 (3)   | 2.87 (0.29 to 28.27)  | NA per 1000         | NA per 1000                                      | <b>Very low</b><br>Due to very serious risk of bias and imprecision         |
|                                                                           |          |                       | 150 (-160 to 450)   |                                                  |                                                                             |
| Early disease                                                             |          |                       |                     |                                                  |                                                                             |
| <b>Necrotizing Fasciitis vs No Necrotizing Fasciitis</b>                  | 28 (3)   | 0.74 (0.12 to 4.48)   | 900 per 1000        | 869 per 1000                                     | <b>Very low</b><br>Due to very serious risk of bias and imprecision         |
|                                                                           |          |                       | -31 (-381 to 76)    |                                                  |                                                                             |
| Treatment                                                                 |          |                       |                     |                                                  |                                                                             |
| <b>IVIG vs No IVIG (all STSS patients)</b>                                | 156 (3)  | 1.09 (0.43 to 2.77)   | 833 per 1000        | 845 per 1000                                     | <b>Very low</b><br>Due to very serious risk of bias and imprecision         |
|                                                                           |          |                       | 12 (-151 to 100)    |                                                  |                                                                             |
| <b>Any Antibiotic vs No Antibiotic</b>                                    | 14 (2)   | 4.60 (0.29 to 72.89)  | 500 per 1000        | 821 per 1000                                     | <b>Very low</b><br>Due to very serious risk of bias and imprecision         |
|                                                                           |          |                       | 321 (-275 to 486)   |                                                  |                                                                             |
| <b>Hemodialysis vs No Hemodialysis</b>                                    | 13 (2)   | 3.25 (0.21 to 50.35)  | 875 per 1000        | 958 per 1000                                     | <b>Very low</b><br>Due to very serious risk of bias and imprecision         |
|                                                                           |          |                       | 83 (-280 to 122)    |                                                  |                                                                             |
| <b>NSAIDs vs No NSAIDs</b>                                                | 15 (2)   | 0.86 (0.06 to 12.48)  | NA per 1000         | NA per 1000                                      | <b>Very low</b><br>Due to very serious risk of bias and imprecision         |
|                                                                           |          |                       | -10 (-430 to 400)   |                                                  |                                                                             |
| CLINICAL CURE OR IMPROVEMENT                                              |          |                       |                     |                                                  |                                                                             |
| Demographic                                                               |          |                       |                     |                                                  |                                                                             |
| <b>Male vs Female</b>                                                     | 23 (4)   | 3.33 (0.47 to 23.59)  | 875 per 1000        | 959 per 1000                                     | <b>Very low</b><br>Due to very serious risk of bias and imprecision         |
|                                                                           |          |                       | 84 (-108 to 119)    |                                                  |                                                                             |
| Early disease                                                             |          |                       |                     |                                                  |                                                                             |
| <b>Necrotizing Fasciitis vs No Necrotizing Fasciitis</b>                  | 24 (2)   | 0.34 (0.02 to 5.20)   | 950 per 1000        | 866 per 1000                                     | <b>Very low</b><br>Due to very serious risk of bias and serious imprecision |
|                                                                           |          |                       | -84 (-675 to 40)    |                                                  |                                                                             |
| Treatment                                                                 |          |                       |                     |                                                  |                                                                             |
| <b>IVIG vs No IVIG (in all STSS patients)</b>                             | 23 (2)   | 0.27 (0.02 to 3.76)   | NA per 1000         | NA per 1000                                      | <b>Very low</b><br>Due to very serious risk of bias and imprecision         |
|                                                                           |          |                       | -100 (-350 to 140)  |                                                  |                                                                             |

|                                                   |         |                      |                                                        |              |                                                                      |
|---------------------------------------------------|---------|----------------------|--------------------------------------------------------|--------------|----------------------------------------------------------------------|
| Hemodialysis vs No Hemodialysis                   | 26 (3)  | 1.43 (0.15 to 14.08) | NA per 1000                                            | NA per 1000  | Very low<br>Due to very serious risk of bias and imprecision         |
|                                                   |         |                      | 50 (-240 to 340)                                       |              |                                                                      |
| NEED FOR MECHANICAL VENTILATION                   |         |                      |                                                        |              |                                                                      |
| Demographic                                       |         |                      |                                                        |              |                                                                      |
| Male vs Female                                    | 21 (3)  | 2.09 (0.32 to 13.74) | NA per 1000                                            | NA per 1000  | Very low<br>Due to very serious risk of bias and imprecision         |
|                                                   |         |                      | 120 (-200 to 440)                                      |              |                                                                      |
| Early disease                                     |         |                      |                                                        |              |                                                                      |
| Acute Renal Failure vs No Acute Renal Failure     | 20 (2)  | 1.14 (0.17 to 7.82)  | 750 per 1000                                           | 774 per 1000 | Very low<br>Due to very serious risk of bias and imprecision         |
|                                                   |         |                      | 24 (-412 to 209)                                       |              |                                                                      |
| Necrotizing Fasciitis vs No Necrotizing Fasciitis | 31 (3)  | 3.75 (0.47 to 29.81) | 700 per 1000                                           | 897 per 1000 | Very low<br>Due to very serious risk of bias and imprecision         |
|                                                   |         |                      | 197 (-177 to 286)                                      |              |                                                                      |
| Treatment                                         |         |                      |                                                        |              |                                                                      |
| IVIG vs no IVIG (in all STSS patients)            | 157 (3) | 2.22 (0.78 to 6.32)  | 333 per 1000                                           | 526 per 1000 | Very low<br>Due to very serious risk of bias and imprecision         |
|                                                   |         |                      | 193 (-53 to 426)                                       |              |                                                                      |
| Hemodialysis vs No Hemodialysis                   | 26 (3)  | 2.05 (0.39 to 10.70) | 500 per 1000                                           | 672 per 1000 | Very low<br>Due to very serious risk of bias and imprecision         |
|                                                   |         |                      | 172 (-219 to 415)                                      |              |                                                                      |
| DURATION OF HOSPITALIZATION                       |         |                      |                                                        |              |                                                                      |
| Treatment                                         |         |                      |                                                        |              |                                                                      |
| IVIG vs no IVIG (all STSS patients)               | 201 (3) | NA                   | NA per 1000                                            | NA per 1000  | Low<br>Due to serious risk of bias and imprecision                   |
|                                                   |         |                      | On average, 5.51 fewer days (17.64 fewer to 6.62 more) |              |                                                                      |
| DURATION OF INTENSIVE CARE UNIT STAY              |         |                      |                                                        |              |                                                                      |
| Treatment                                         |         |                      |                                                        |              |                                                                      |
| IVIG vs no IVIG (all STSS patients)               | 131 (2) | NA                   | NA per 1000                                            | NA per 1000  | Very low<br>Due to very serious risk of bias and serious imprecision |
|                                                   |         |                      | On average, 3.80 more days (3.62 fewer to 11.23 more)  |              |                                                                      |

\*statistical evidence of an association

### Prognostic factors for ICU admission

Six prognostic factors from eight studies including 174 patients were eligible for analysis (table 3, supplementary data). We found no statistical evidence of an association between any prognostic factor and ICU admission: male vs female sex (n=19, OR 2.87, 95% CI 0.29 to 28.27), necrotizing fasciitis vs no necrotizing fasciitis (n=28, OR 0.74, 95% CI 0.12 to 4.48), hemodialysis vs no hemodialysis (n=13, OR 3.25, 95% CI 0.21 to 50.35), NSAIDs vs no NSAIDs (n=15, OR 0.86, 95% CI 0.06 to 12.48), IVIG treatment vs no IVIG treatment (n=156, OR 1.09, 95% CI 0.43 to 2.77) and antibiotic treatment vs no antibiotic treatment (n=14, OR 4.60, 95% CI 0.29 to 72.98). The certainty of all ICU admission evidence was very low due to very serious risk of bias and imprecision.

### **Prognostic factors for clinical cure or improvement**

Four prognostic factors from six studies including 38 STSS patients were eligible for analysis (table 3, supplementary data). We found no statistical evidence of an association between any prognostic factor and clinical cure or improvement: male vs female sex (n=23, OR 3.33, 95% CI 0.47 to 23.59), necrotizing fasciitis vs no necrotizing fasciitis (n=24, OR 0.34, 95% CI 0.02 to 5.20), hemodialysis vs no hemodialysis (n=26, OR 1.43, 95% CI 0.15 to 14.08) and IVIG treatment vs no IVIG treatment (n=23, OR 0.27, 95% CI 0.02 to 3.76). The certainty of all clinical cure or improvement evidence was very low due to very serious risk of bias and serious or very serious imprecision.

### **Prognostic factors for mechanical ventilation**

Five prognostic factors from six studies including 170 STSS patients were eligible for analysis (table 3, supplementary data). We found no statistical evidence of an association between any prognostic factor and need for mechanical ventilation: male vs female sex (n=21, OR 2.09, 95% CI 0.32 to 13.74), necrotizing fasciitis vs no necrotizing fasciitis (n=31, OR 3.75, 95% CI 0.47 to 29.81), acute renal failure vs no acute renal failure (n=20, OR 1.14, 95% CI 0.17 to 7.82), hemodialysis vs no hemodialysis (n=26, OR 2.05, 95% CI 0.39 to 10.70) and IVIG treatment vs no IVIG treatment (n=157, OR 2.22, 95% CI 0.78 to 6.32). The certainty of all need for mechanical ventilation evidence was very low due to very serious risk of bias and imprecision.

### **Prognostic factors for hospital length-of-stay**

One prognostic factor from three studies including 201 STSS patients was eligible for analysis (table 3, supplementary data). Low certainty evidence – due to serious risk of bias and imprecision – provides no support for an association between IVIG treatment and hospital length-of-stay, when compared to no IVIG treatment (n=201, MD -5.51 days, 95% CI -17.64 to 6.62).

### **Prognostic factors for intensive care unit length-of-stay**

One prognostic factor from two studies including 131 STSS patients was eligible for analysis (table 3, supplementary data). We are uncertain if IVIG treatment compared to no IVIG

1  
2  
3 treatment is associated with ICU length-of-stay (n=131, MD 3.80 days, 95% CI -3.62 to 11.23;  
4 very low certainty evidence due to very serious risk of bias and serious imprecision).  
5  
6  
7

### 8 **Subgroup analysis**

9  
10 Sparsity of data precluded our planned subgroup analyses by clindamycin treatment, presence of  
11 necrotizing fasciitis and sex (i.e. each subgroup did not have at least two studies). We collapsed  
12 the low and moderate risk of bias categories to allow for subgroup analysis by risk of bias (low  
13 or moderate vs high). The prognostic factor-outcome combinations for which there was  
14 sufficient evidence for subgroup analysis by age or modified risk of bias level were IVIG-  
15 mortality and sex-mortality. We found no statistical evidence that the association between IVIG  
16 and mortality differed between low or moderate and high risk of bias studies in all STSS patients  
17 (p=0.884) and clindamycin-treated STSS patients (p=0.867) or between studies with STSS  
18 patients <18 years and patients 18-64 years (p=0.328). We also found no statistical evidence that  
19 the association between sex and mortality differed between studies with patients <18 years and  
20 patients 18-64 years (p=0.666).  
21  
22  
23  
24  
25  
26  
27  
28  
29  
30

### 31 **Discussion**

32 This systematic review and meta-analysis provides a comprehensive overview of the prognostic  
33 evidence for STSS. Prognostic factors for which there was statistical evidence of an association  
34 with mortality in STSS patients were age, clindamycin treatment, IVIG treatment and NSAIDs  
35 treatment. Patients  $\geq 65$  years compared to patients 18 to 64 years may have increased odds of  
36 mortality (low certainty of evidence); however we are uncertain if the same is true for patients  
37  $\geq 65$  years compared to patients <18 years (very low certainty of evidence). We are also uncertain  
38 whether NSAIDs increase the odds of mortality (very low certainty of evidence). Low certainty  
39 evidence suggests the odds of mortality may be reduced by treatment with clindamycin and  
40 within clindamycin-treated patients, IVIG. We are highly uncertain whether IVIG reduces  
41 mortality in all STSS patients, regardless of clindamycin treatment (very low certainty of  
42 evidence). Results failed to show a significant association between all other meta-analyzed  
43 prognostic factors and outcomes (table 3). The certainty of STSS prognostic evidence was low or  
44 very low due to serious or very serious risk of bias and imprecision concerns.  
45  
46  
47  
48  
49  
50  
51  
52  
53  
54  
55  
56  
57  
58  
59  
60

1  
2  
3 Strengths of this review include its systematic and explicit search of the literature, capture of a  
4 wide breadth of patient-important outcomes within and outside of critical care and the use of  
5 meta-analysis to increase statistical power in studying relationships between prognostic factors  
6 and outcomes in STSS patients. These strengths directly address limitations of a narrative  
7 synthesis of STSS prognosis restricted to the critical care setting [1].  
8  
9  
10  
11  
12

13 In the absence of large cohort studies and randomized trials, conclusions for STSS prognosis in  
14 this review are limited by very low to low certainty evidence. The majority of included studies  
15 were non-randomized (39/40, 98%) and small (median sample size was 10 patients), introducing  
16 bias from residual confounding and imprecision around pooled summary estimates. Small  
17 numbers of events further contributed to the imprecision around summary estimates. With few  
18 participants and events, minor changes in the data can cause major changes in the results. In such  
19 instances, results can be exaggerated by the presentation of relative effect estimates only. To minimize the  
20 risk of misinterpreting results from the inclusion of small studies in our meta-analyses, we calculated an  
21 absolute effect estimate for each relative effect estimate (table 3). Further, despite expecting small studies  
22 to be more heterogeneous than large studies, we did not find statistical evidence of heterogeneity in any of  
23 our 33 meta-analyses and in interpreting the  $I^2$  statistic value, we found not likely important heterogeneity  
24 in all but one meta-analysis [63]. Creation of an international registry of STSS patients may  
25 improve the credibility of prognostic evidence for STSS. Although we meta-analyzed adjusted  
26 odds ratios from included studies when possible, almost all included studies reported crude data  
27 (38/40, 95%), precluding adjustment for important confounders. A limitation of the evidence is  
28 the lack of long-term outcome data reported. For example, no studies quantified associations  
29 between prognostic factors and functional status or health related quality of life outcomes post-  
30 infection in STSS survivors. Given the high morbidity associated with STSS [64], future  
31 research in STSS prognosis should quantify these patient-important outcomes, facilitating future  
32 meta-analyses and providing further insights into STSS prognosis.  
33  
34  
35  
36  
37  
38  
39  
40  
41  
42  
43  
44  
45  
46  
47  
48

49 Our finding that IVIG treatment may reduce the odds of mortality in STSS patients who receive  
50 clindamycin treatment is consistent with a systematic review and meta-analysis of IVIG  
51 treatment in clindamycin-treated STSS patients, which found statistical evidence of a decreased  
52 risk of mortality in IVIG- and clindamycin-treated STSS patients when compared to only  
53 clindamycin-treated STSS patients [64]. For this question relevant to clindamycin-treated STSS  
54  
55  
56  
57  
58  
59  
60

1  
2  
3 patients, our meta-analysis included one additional non-randomized study, whose small sample  
4 size and imprecision contributed to an overall point estimate of greater magnitude [30]. Our  
5 findings suggest that treatment regimens of IVIG in adjunct to clindamycin and clindamycin  
6 alone may significantly improve STSS prognosis. We found a significant association between a  
7 regimen of IVIG regardless of clindamycin treatment and mortality; however, due to very serious  
8 risk of bias and serious imprecision, and thus very low certainty evidence, we cannot rule out the  
9 possibility that clindamycin treatment may be necessary for STSS patients to benefit from IVIG  
10 treatment. Further, only one study reported on IVIG treatment in STSS patients that were not  
11 also treated with clindamycin [31]; therefore, our planned subgroup analysis to test if the  
12 beneficial effect of IVIG is modified in the absence of clindamycin was precluded. Based on  
13 very low certainty evidence, our finding that NSAID treatment is significantly associated with  
14 mortality in STSS patients can be explained by clinical and basic science literature, which  
15 suggests nonselective NSAIDs mask early signs and symptoms of GAS infection, such as fever,  
16 subsequently delaying time to antibiotic treatment – a risk factor for severe sepsis and shock, and  
17 mortality [65, 66].  
18  
19  
20  
21  
22  
23  
24  
25  
26  
27  
28  
29  
30

31 After analyzing 30 different prognostic factor and outcome combinations, we found that age  
32 equal to or older than 65 years and treatment with NSAIDs was significantly associated with a  
33 worse STSS prognosis and that clindamycin treatment was significantly associated with an  
34 improved STSS prognosis. Further, we found that IVIG treatment may reduce the odds of  
35 mortality in STSS patients who receive clindamycin treatment, but we are uncertain if this is true  
36 for all STSS patients, regardless of clindamycin treatment. These findings support the use of  
37 IVIG as an adjunctive treatment in clindamycin-treated STSS patients. Results from very low to  
38 low certainty evidence failed to show a significant association between any other factors of  
39 interest and STSS prognosis.  
40  
41  
42  
43  
44  
45  
46  
47

### 48 **Contributors**

49 All authors attest they meet the ICMJE criteria for authorship. All authors have made substantial  
50 contributions to the following: (1) the conception and design of the study (Jessica J Bartoszko,  
51 Lehana Thabane, Dominik Mertz, Mark Loeb), acquisition of data (Jessica J Bartoszko, Zeyad  
52 Elias, Paulina Rudziak, Carson KL Lo), analysis and interpretation of data (Jessica J Bartoszko,  
53  
54  
55  
56  
57  
58  
59  
60

1  
2  
3 Zeyad Elias, Paulina Rudziak, Carson KL Lo, Mark Loeb); (2) drafting the article and revising it  
4 critically for important intellectual content (Jessica J Bartoszko, Lehana Thabane, Dominik  
5 Mertz, Mark Loeb), (3) final approval of the version to be submitted (Jessica J Bartoszko, Zeyad  
6 Elias, Paulina Rudziak, Carson KL Lo, Lehana Thabane, Dominik Mertz, Mark Loeb).  
7  
8  
9

### 10 11 12 **Declaration of interests**

13 Mark Loeb declares grants or contracts from the World Health Organization, consulting fees  
14 from AVIR Pharma, and participating on data safety monitoring or advisory boards for Paladin  
15 Labs and Sunovion Pharmaceuticals.  
16  
17  
18  
19

20 I, the Submitting Author has the right to grant and does grant on behalf of all authors of the  
21 Work (as defined in the below author licence), an exclusive licence and/or a non-exclusive  
22 licence for contributions from authors who are: i) UK Crown employees; ii) where BMJ has  
23 agreed a CC-BY licence shall apply, and/or iii) in accordance with the terms applicable for US  
24 Federal Government officers or employees acting as part of their official duties; on a worldwide,  
25 perpetual, irrevocable, royalty-free basis to BMJ Publishing Group Ltd (“BMJ”) its licensees and  
26 where the relevant Journal is co-owned by BMJ to the co-owners of the Journal, to publish the  
27 Work in BMJ Medicine and any other BMJ products and to exploit all rights, as set out in our  
28 licence.  
29  
30  
31  
32  
33  
34  
35  
36  
37

38 The Submitting Author accepts and understands that any supply made under these terms is made  
39 by BMJ to the Submitting Author unless you are acting as an employee on behalf of your  
40 employer or a postgraduate student of an affiliated institution which is paying any applicable  
41 article publishing charge (“APC”) for Open Access articles. Where the Submitting Author  
42 wishes to make the Work available on an Open Access basis (and intends to pay the relevant  
43 APC), the terms of reuse of such Open Access shall be governed by a Creative Commons licence  
44 – details of these licences and which Creative Commons licence will apply to this Work are set  
45 out in our licence referred to above.  
46  
47  
48  
49  
50  
51  
52

### 53 **Role of the funding source**

54 There was no funding source for this study.  
55  
56  
57  
58  
59  
60

**Data availability statement**

Data extracted from individual studies are available upon reasonable request to the corresponding author. All other data relevant to the study are included in the article or uploaded as online supplemental information.

**Ethics statement**

Patient consent for publication not applicable.

For peer review only



## References

1. Schmitz, M., et al., *Streptococcal toxic shock syndrome in the intensive care unit*. Annals of intensive care, 2018. **8**(1): p. 88-88.
2. O'Loughlin, R.E., et al., *The epidemiology of invasive group A streptococcal infection and potential vaccine implications: United States, 2000-2004*. Clin Infect Dis, 2007. **45**(7): p. 853-62.
3. Canada, G.o., *Group A Streptococcal diseases: For health professionals*. <https://www.canada.ca/en/public-health/services/diseases/group-a-streptococcal-diseases/health-professionals.html>, 2019.
4. Davies, H.D., et al., *Invasive Group A Streptococcal Infections in Ontario, Canada*. New England Journal of Medicine, 1996. **335**(8): p. 547-554.
5. Adalat, S., et al., *Toxic shock syndrome surveillance in UK children*. Arch Dis Child, 2014. **99**(12): p. 1078-82.
6. Carapetis, J.R., et al., *Effectiveness of clindamycin and intravenous immunoglobulin, and risk of disease in contacts, in invasive group a streptococcal infections*. Clin Infect Dis, 2014. **59**(3): p. 358-65.
7. Darenberg, J., et al., *Intravenous immunoglobulin G therapy in streptococcal toxic shock syndrome: a European randomized, double-blind, placebo-controlled trial*. Clin Infect Dis, 2003. **37**(3): p. 333-40.
8. Kadri, S.S., et al., *Impact of Intravenous Immunoglobulin on Survival in Necrotizing Fasciitis With Vasopressor-Dependent Shock: A Propensity Score-Matched Analysis From 130 US Hospitals*. Clin Infect Dis, 2017. **64**(7): p. 877-885.
9. Kaul, R., et al., *Population-based surveillance for group A streptococcal necrotizing fasciitis: Clinical features, prognostic indicators, and microbiologic analysis of seventy-seven cases. Ontario Group A Streptococcal Study*. Am J Med, 1997. **103**(1): p. 18-24.
10. Kaul, R., et al., *Intravenous immunoglobulin therapy for streptococcal toxic shock syndrome--a comparative observational study. The Canadian Streptococcal Study Group*. Clin Infect Dis, 1999. **28**(4): p. 800-7.
11. Linnér, A., et al., *Clinical efficacy of polyspecific intravenous immunoglobulin therapy in patients with streptococcal toxic shock syndrome: a comparative observational study*. Clin Infect Dis, 2014. **59**(6): p. 851-7.
12. Madsen, M.B., et al., *Immunoglobulin G for patients with necrotising soft tissue infection (INSTINCT): a randomised, blinded, placebo-controlled trial*. Intensive Care Med, 2017. **43**(11): p. 1585-1593.
13. Mehta, S., et al., *Morbidity and mortality of patients with invasive group A streptococcal infections admitted to the ICU*. Chest, 2006. **130**(6): p. 1679-86.
14. Shah, S.S., et al., *Intravenous immunoglobulin in children with streptococcal toxic shock syndrome*. Clin Infect Dis, 2009. **49**(9): p. 1369-76.
15. York., C.f.R.a.D.U.o., *PROSPERO. International prospective register of systematic reviews*. <<http://www.crd.york.ac.uk/PROSPERO/>>. 2017.
16. Jessica Bartoszko, Z.E., Dominik Mertz, Lehana Thabane, Mark Loeb., *Natural History and Prognosis of Streptococcal Toxic Shock Syndrome: Systematic Review and Meta-*

- Analysis. Available from:  
[https://www.crd.york.ac.uk/prospero/display\\_record.php?ID=CRD42020166961](https://www.crd.york.ac.uk/prospero/display_record.php?ID=CRD42020166961), 2020.
17. Moher, D., et al., *Preferred reporting items for systematic reviews and meta-analyses: the PRISMA statement*. BMJ, 2009. **339**: p. b2535.
  18. Stroup, D.F., et al., *Meta-analysis of observational studies in epidemiology: a proposal for reporting. Meta-analysis Of Observational Studies in Epidemiology (MOOSE) group*. Jama, 2000. **283**(15): p. 2008-12.
  19. Practice, B.B., *Study design search filters*.  
<https://bestpractice.bmj.com/info/toolkit/learn-ebm/study-design-search-filters/>.
  20. Sterne, J.A.C., et al., *Recommendations for examining and interpreting funnel plot asymmetry in meta-analyses of randomised controlled trials*. BMJ, 2011. **343**: p. d4002.
  21. Morrison, A., et al., *The effect of English-language restriction on systematic review-based meta-analyses: a systematic review of empirical studies*. Int J Technol Assess Health Care, 2012. **28**(2): p. 138-44.
  22. Moher, D., et al., *What contributions do languages other than English make on the results of meta-analyses?* J Clin Epidemiol, 2000. **53**(9): p. 964-72.
  23. Canada, G.o., *National case definition: Invasive group A streptococcal disease*. 2008.
  24. Ouzzani, M., et al., *Rayyan—a web and mobile app for systematic reviews*. Systematic Reviews, 2016. **5**(1): p. 210.
  25. Hayden, J.A., et al., *Assessing bias in studies of prognostic factors*. Ann Intern Med, 2013. **158**(4): p. 280-6.
  26. Guyatt, G., et al., *GRADE guidelines: 1. Introduction-GRADE evidence profiles and summary of findings tables*. (1878-5921 (Electronic)).
  27. Huguet, A., et al., *Judging the quality of evidence in reviews of prognostic factor research: adapting the GRADE framework*. Systematic Reviews, 2013. **2**(1): p. 71.
  28. Viechtbauer, W., *Conducting Meta-Analyses in R with the metafor Package*. Journal of Statistical Software; Vol 1, Issue 3 (2010), 2010.
  29. Higgins JP, G.S., *Cochrane handbook for systematic reviews of interventions version 5.1.0 (updated March 2011)*. The Cochrane Collaboration , 2011. handbook.cochrane.org, 2011.
  30. Barnham, M.R., et al., *Streptococcal toxic shock syndrome: a description of 14 cases from North Yorkshire, UK*. Clin Microbiol Infect, 2002. **8**(3): p. 174-81.
  31. Stegmayr, B., et al., *Septic shock induced by group A streptococcal infection: clinical and therapeutic aspects*. Scand J Infect Dis, 1992. **24**(5): p. 589-97.
  32. Abuhammour, W., R.A. Hasan, and E. Unuvar, *Group A beta-hemolytic streptococcal bacteremia*. Indian J Pediatr, 2004. **71**(10): p. 915-9.
  33. Al-ajmi, J.A., et al., *Group A Streptococcus Toxic Shock Syndrome: An outbreak report and review of the literature*. J Infect Public Health, 2012. **5**(6): p. 388-93.
  34. Bernaldo de Quirós, J.C., et al., *Group A streptococcal bacteremia. A 10-year prospective study*. Medicine (Baltimore), 1997. **76**(4): p. 238-48.
  35. Brogan, T.V., et al., *Group A streptococcal necrotizing fasciitis complicating primary varicella: a series of fourteen patients*. Pediatr Infect Dis J, 1995. **14**(7): p. 588-94.
  36. Butragueño Laiseca, L., et al., *Toxic shock syndrome in a paediatric intensive care unit over the last 15 years*. Anales de Pediatría (English Edition), 2017. **87**(2): p. 111-113.

- 1
- 2
- 3
- 4 37. Carapetis, J., et al., *Increasing severity of invasive group A streptococcal disease in*
- 5 *Australia: clinical and molecular epidemiological features and identification of a new*
- 6 *virulent M-nontypeable clone.* Clin Infect Dis, 1995. **21**(5): p. 1220-7.
- 7 38. Cimolai, N., et al., *Invasive Streptococcus pyogenes infections in children.* Can J Public
- 8 Health, 1992. **83**(3): p. 230-3.
- 9 39. Cook, A., et al., *Manifestations of Toxic Shock Syndrome in Children, Columbus, Ohio,*
- 10 *USA, 2010-2017(1).* Emerging infectious diseases, 2020. **26**(6): p. 1077-1083.
- 11 40. Cowan, M.R., et al., *Serious group A beta-hemolytic streptococcal infections*
- 12 *complicating varicella.* Ann Emerg Med, 1994. **23**(4): p. 818-22.
- 13 41. Crum, N.F., et al., *A case series of group A Streptococcus necrotizing fasciitis in military*
- 14 *trainees.* Mil Med, 2004. **169**(5): p. 373-5.
- 15 42. Dahl, P.R., et al., *Fulminant group A streptococcal necrotizing fasciitis: clinical and*
- 16 *pathologic findings in 7 patients.* J Am Acad Dermatol, 2002. **47**(4): p. 489-92.
- 17 43. Donaldson, P.M., et al., *Rapidly fatal necrotising fasciitis caused by Streptococcus*
- 18 *pyogenes.* Journal of clinical pathology, 1993. **46**(7): p. 617-620.
- 19 44. Erdem, G., et al., *Characterization of a community cluster of group a streptococcal*
- 20 *invasive disease in Maui, Hawaii.* The Pediatric infectious disease journal, 2004. **23**(7): p.
- 21 677-679.
- 22 45. Eriksson, B.K., et al., *Invasive group A streptococcal infections: T1M1 isolates expressing*
- 23 *pyrogenic exotoxins A and B in combination with selective lack of toxin-neutralizing*
- 24 *antibodies are associated with increased risk of streptococcal toxic shock syndrome.* J
- 25 Infect Dis, 1999. **180**(2): p. 410-8.
- 26 46. Forni, A.L., et al., *Clinical and microbiological characteristics of severe group A*
- 27 *streptococcus infections and streptococcal toxic shock syndrome.* Clin Infect Dis, 1995.
- 28 **21**(2): p. 333-40.
- 29 47. Fronhoffs, S., et al., *The effect of C1-esterase inhibitor in definite and suspected*
- 30 *streptococcal toxic shock syndrome. Report of seven patients.* Intensive Care Med, 2000.
- 31 **26**(10): p. 1566-70.
- 32 48. Hasegawa, T., et al., *Factors determining prognosis in streptococcal toxic shock-like*
- 33 *syndrome: results of a nationwide investigation in Japan.* Microbes Infect, 2004. **6**(12): p.
- 34 1073-7.
- 35 49. Hayata, E., et al., *Nationwide study of mortality and survival in pregnancy-related*
- 36 *streptococcal toxic shock syndrome.* The journal of obstetrics and gynaecology research,
- 37 2021. **47**(3): p. 928-934.
- 38 50. Huang, Y.C., et al., *A family cluster of streptococcal toxic shock syndrome in children:*
- 39 *clinical implication and epidemiological investigation.* Pediatrics, 2001. **107**(5): p. 1181-
- 40 3.
- 41 51. Kansal, R.G., et al., *Inverse relation between disease severity and expression of the*
- 42 *streptococcal cysteine protease, SpeB, among clonal M1T1 isolates recovered from*
- 43 *invasive group A streptococcal infection cases.* Infect Immun, 2000. **68**(11): p. 6362-9.
- 44 52. Linder, K.A., et al., *Effect of underlying immune compromise on the manifestations and*
- 45 *outcomes of group A streptococcal bacteremia.* J Infect, 2017. **74**(5): p. 450-455.
- 46 53. Luca-Harari, B., et al., *Clinical and microbiological characteristics of severe Streptococcus*
- 47 *pyogenes disease in Europe.* J Clin Microbiol, 2009. **47**(4): p. 1155-65.
- 48
- 49
- 50
- 51
- 52
- 53
- 54
- 55
- 56
- 57
- 58
- 59
- 60

- 1
- 2
- 3
- 4 54. Nelson, G.E., et al., *Epidemiology of Invasive Group A Streptococcal Infections in the*
- 5 *United States, 2005-2012*. Clin Infect Dis, 2016. **63**(4): p. 478-86.
- 6
- 7 55. Safar, A., et al., *Invasive Group A Streptococcal Infection and Vaccine Implications,*
- 8 *Auckland, New Zealand*. Emerging Infectious Diseases, 2011. **17**(6): p. 983-989.
- 9
- 10 56. Schwartz, B., et al., *Clusters of invasive group A streptococcal infections in family,*
- 11 *hospital, and nursing home settings*. Clin Infect Dis, 1992. **15**(2): p. 277-84.
- 12
- 13 57. Sriskandan, S. and J. Cohen, *Kallikrein-kinin system activation in streptococcal toxic*
- 14 *shock syndrome*. Clin Infect Dis, 2000. **30**(6): p. 961-2.
- 15
- 16 58. Stockmann, C., et al., *Evolving epidemiologic characteristics of invasive group a*
- 17 *streptococcal disease in Utah, 2002-2010*. Clin Infect Dis, 2012. **55**(4): p. 479-87.
- 18
- 19 59. Tagini, F., et al., *Importance of whole genome sequencing for the assessment of*
- 20 *outbreaks in diagnostic laboratories: analysis of a case series of invasive Streptococcus*
- 21 *pyogenes infections*. Eur J Clin Microbiol Infect Dis, 2017. **36**(7): p. 1173-1180.
- 22
- 23 60. Zachariadou, L., et al., *Differences in the epidemiology between paediatric and adult*
- 24 *invasive Streptococcus pyogenes infections*. Epidemiol Infect, 2014. **142**(3): p. 512-9.
- 25
- 26 61. Stevens, D.L., et al., *Severe group A streptococcal infections associated with a toxic*
- 27 *shock-like syndrome and scarlet fever toxin A*. N Engl J Med, 1989. **321**(1): p. 1-7.
- 28
- 29 62. Page, A.V., et al., *Systemic dysregulation of angiopoietin-1/2 in streptococcal toxic shock*
- 30 *syndrome*. Clin Infect Dis, 2011. **52**(8): p. e157-61.
- 31
- 32 63. IntHout, J., et al., *Small studies are more heterogeneous than large ones: a meta-meta-*
- 33 *analysis*. Journal of Clinical Epidemiology, 2015. **68**(8): p. 860-869.
- 34
- 35 64. Parks, T., et al., *Polyspecific Intravenous Immunoglobulin in Clindamycin-treated Patients*
- 36 *With Streptococcal Toxic Shock Syndrome: A Systematic Review and Meta-analysis*.
- 37 *Clinical infectious diseases : an official publication of the Infectious Diseases Society of*
- 38 *America*, 2018. **67**(9): p. 1434-1436.
- 39
- 40 65. Legras, A., et al., *A multicentre case-control study of nonsteroidal anti-inflammatory*
- 41 *drugs as a risk factor for severe sepsis and septic shock*. Critical Care, 2009. **13**(2): p. R43.
- 42
- 43 66. Bryant, A.E., et al., *The roles of injury and nonsteroidal anti-inflammatory drugs in the*
- 44 *development and outcomes of severe group A streptococcal soft tissue infections*.
- 45 *Current Opinion in Infectious Diseases*, 2015. **28**(3).
- 46
- 47
- 48
- 49
- 50
- 51
- 52
- 53
- 54
- 55
- 56
- 57
- 58
- 59
- 60

**Figure 1. PRISMA flow diagram.**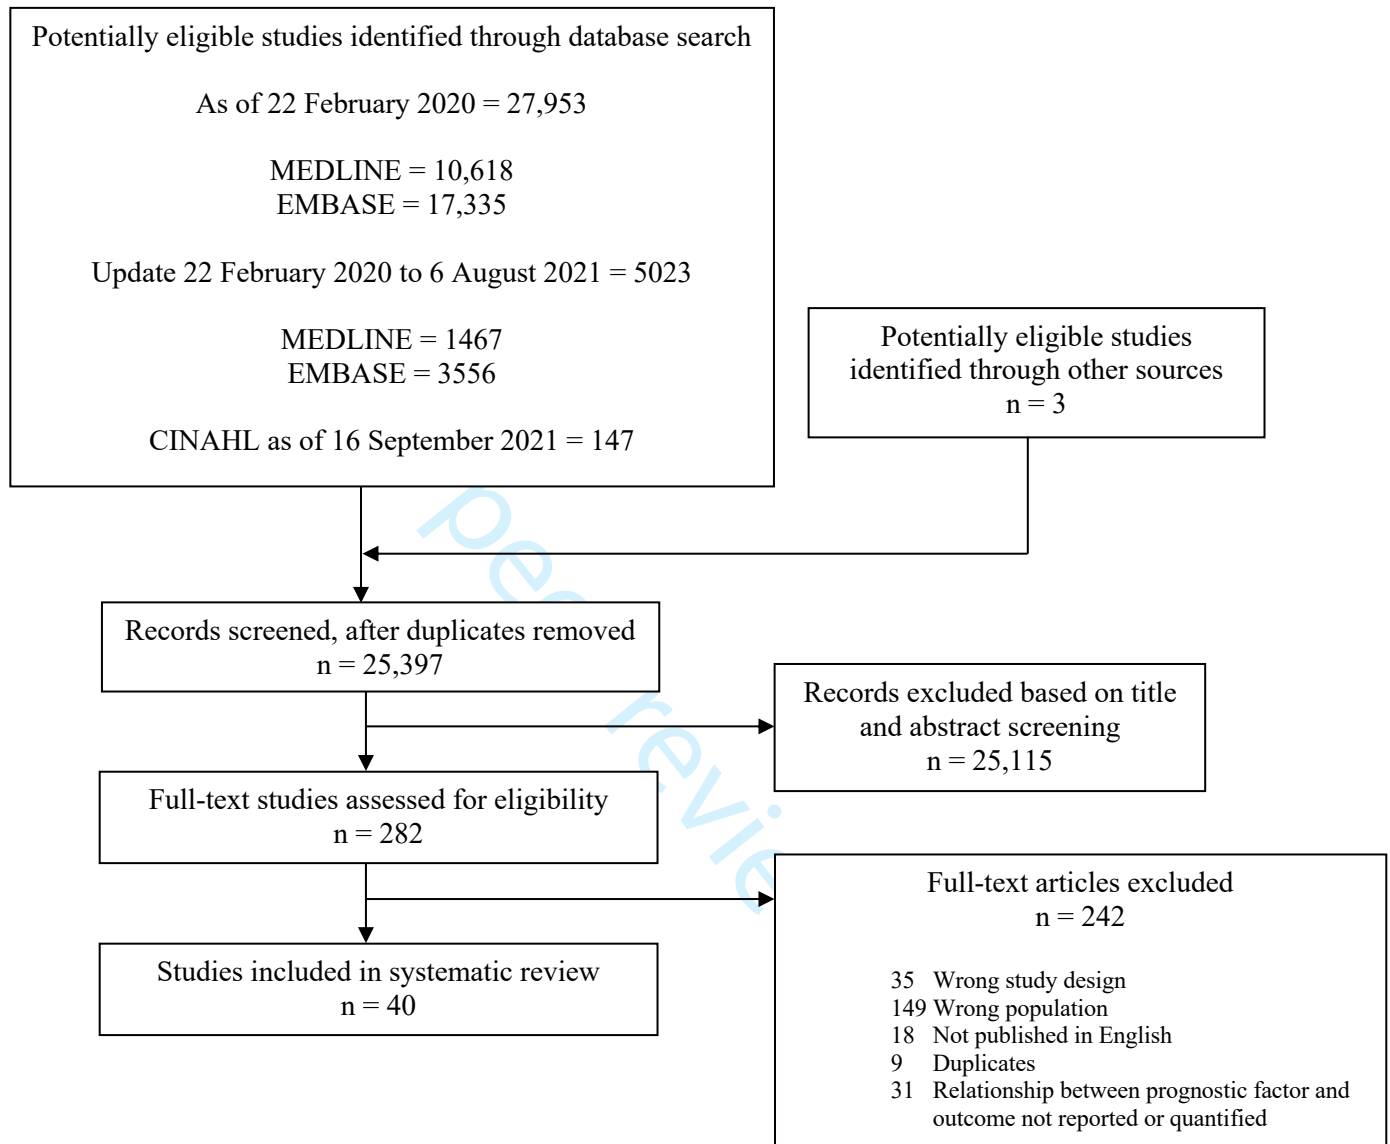

# PROGNOSTIC FACTORS FOR STREPTOCOCCAL TOXIC SHOCK SYNDROME: SYSTEMATIC REVIEW AND META-ANALYSIS

## Supplementary Material

| <b>Table of contents</b>                                       | <b>Page</b> |
|----------------------------------------------------------------|-------------|
| Search strategy                                                | 2           |
| GRADE assessment guidance                                      | 4           |
| Description of studies excluded at full text stage             | 6           |
| Additional study characteristics                               | 18          |
| Forest plots for pairwise meta-analyses                        | 25          |
| Description of studies ineligible for meta-analysis by outcome | 40          |

## Search strategies

1) Database: OVID Medline Epub Ahead of Print, In-Process & Other Non-Indexed Citations, Ovid MEDLINE(R) Daily and Ovid MEDLINE(R) 1946 to Present

Search Strategy:

-----

- 1 toxic shock syndrome.mp. or exp Shock, Septic/ or STSS.mp. or streptococcal toxic shock syndrome.mp. or necrotizing fasciitis.mp. or exp Fasciitis, Necrotizing/ or septic shock.mp.
- 2 (group a streptococc\* or group A streptococc\* or pyogenes or streptococcus pyogenes).mp. or exp Streptococcus pyogenes/
- 3 exp Cohort Studies/
- 4 cohort\$.tw.
- 5 controlled clinical trial.pt.
- 6 epidemiologic methods/
- 7 limit 6 to yr=1966-1989
- 8 exp case-control studies/
- 9 (case\$ and control\$).tw.
- 10 (case\$ and series).tw.
- 11 or/3-5,7-10
- 12 randomized controlled trial.pt.
- 13 (random\$ or placebo\$ or single blind\$ or double blind\$ or triple blind\$).ti,ab.
- 14 (retraction of publication or retracted publication).pt.
- 15 or/12-14
- 16 (animals not humans).sh.
- 17 ((comment or editorial or meta-analysis or practice-guideline or review or letter) not randomized controlled trial).pt.
- 18 (random sampl\$ or random digit\$ or random effect\$ or random survey or random regression).ti,ab. not randomized controlled trial.pt.
- 19 15 not (16 or 17 or 18)
- 20 animals/ not humans/
- 21 (1 or 2) and (11 or 19)
- 22 21 not 20

2) Database: Embase <1974 to 2020 February 03>

Search Strategy:

-----

- 1 toxic shock syndrome.mp. or exp septic shock/ or STSS.mp. or streptococcal toxic shock syndrome.mp. or necrotizing fasciitis.mp. or exp necrotizing fasciitis/ or septic shock.mp. or exp toxic shock syndrome/
- 2 (group a streptococc\* or group A streptococc\* or pyogenes or streptococcus pyogenes).mp. or exp Streptococcus pyogenes/ or exp Streptococcus group A/
- 3 exp cohort analysis/
- 4 exp longitudinal study/
- 5 exp prospective study/

1  
2  
3 6 exp follow up/  
4 7 cohort\$.tw.  
5 8 exp case control study/ or (case\$ and control\$).tw.  
6 9 exp case study/ or (case\$ and series).tw.  
7 10 or/3-9  
8 11 (random\$ or placebo\$ or single blind\$ or double blind\$ or triple blind\$).ti,ab.  
9 12 RETRACTED ARTICLE/  
10 13 or/11-12  
11 14 (animal\$ not human\$).sh,hw.  
12 15 (book or conference paper or editorial or letter or review).pt. not exp randomized controlled  
13 trial/  
14 16 (random sampl\$ or random digit\$ or random effect\$ or random survey or random  
15 regression).ti,ab. not exp randomized controlled trial/  
16 17 13 not (14 or 15 or 16)  
17 18 exp animal/  
18 19 exp human/  
19 20 18 not 19  
20 21 (1 or 2) and (10 or 17)  
21 22 21 not 20  
22  
23  
24  
25  
26  
27  
28  
29  
30  
31  
32  
33  
34  
35  
36  
37  
38  
39  
40  
41  
42  
43  
44  
45  
46  
47  
48  
49  
50  
51  
52  
53  
54  
55  
56  
57  
58  
59  
60



## GRADE assessment guidance

Based on GRADE guidance for prognostic studies, we start with high certainty evidence for each meta-analysis.

### Risk of bias

For each meta-analysis, we downgraded the certainty of the evidence once for risk of bias when studies with moderate or high risk of bias contributed >50% weight to the pooled effect estimates or when studies providing unadjusted estimates contributed >50% weight to the pooled effect estimate (i.e. serious risk of bias). We downgraded the certainty of the evidence twice for risk of bias when studies with moderate or high risk of bias contributed >80% weight to the pooled effect estimates or when studies providing unadjusted estimates contributed >80% weight to the pooled effect estimate (i.e. very serious risk of bias).

### Inconsistency

We used visual inspection of the forest plots and the  $I^2$  statistic to assess inconsistency. For visual inspection of the forest plots, we considered the variability in point estimates and confidence interval overlap in relation to the null effect. Further, we downgraded the certainty of the evidence once when there was substantial ( $I^2$  50-90%) heterogeneity and twice when there was considerable ( $I^2$  75-100%) heterogeneity.

### Imprecision

We downgraded the certainty of the evidence once for imprecision if:

- 1) The effect on the patient, or clinical action, would differ depending on whether the upper or the lower boundary of the confidence interval represented the truth, **OR**
- 2) The 95% CI of the pooled absolute estimate crossed the null effect by less than 50 people per 1000 on one or both sides, **OR**
- 3) In cases where we had large effects that did not cross the null, we assessed the optimal information size. If the ratio of the upper to the lower limit of the confidence interval of the relative estimate was >3, the optimal information size would never be met; thus, we rated down once for imprecision, **OR**
- 4) There were fewer than 10 outcome events for each prognostic variable (for dichotomous outcomes, **OR**
- 5) There were fewer than 100 cases reaching endpoint (for continuous outcomes).

We downgraded the certainty of the evidence twice for imprecision if:

- 1) The 95% CI of the pooled absolute estimate crossed the null effect by more than 50 people per 1000 on both sides.

### Indirectness

We rated down once if the study sample, the prognostic factor, and/or the outcome in the primary studies did not accurately reflect the review question.

### Publication bias

We rated down once if:

- 1) Small studies reported higher rates compared to large studies, suggesting the selective publication of “positive” studies, **OR**

1  
2  
3 2) The value of the risk/protective factor in predicting the outcome has NOT been repetitively  
4 investigated (e.g. only exploratory studies with no external validation, replication or  
5 confirmation exist).  
6

## 7 8 **References**

- 9 1. Guyatt GH, Oxman AD, Kunz R, et al. GRADE Guidelines 6. Rating the Quality of  
10 Evidence—Imprecision. *J Clin Epidemiol* 2011; 64(12): 1283–93.  
11 <https://doi.org/10.1016/j.jclinepi.2011.01.012>
- 12 2. Huguét A, Hayden JA, Stinson J, et al. Judging the quality of evidence in reviews of  
13 prognostic factor research: adapting the GRADE framework. *Syst Rev.* 2013;2:71.  
14 Published 2013 Sep 5. doi:10.1186/2046-4053-2-71  
15  
16  
17  
18  
19  
20  
21  
22  
23  
24  
25  
26  
27  
28  
29  
30  
31  
32  
33  
34  
35  
36  
37  
38  
39  
40  
41  
42  
43  
44  
45  
46  
47  
48  
49  
50  
51  
52  
53  
54  
55  
56  
57  
58  
59  
60

### Table of excluded full texts (n=242)

| Author, Year     | Title                                                                                                                                                               | Reason for Exclusion |
|------------------|---------------------------------------------------------------------------------------------------------------------------------------------------------------------|----------------------|
| Hamilton, 2013   | Pregnancy-related group a streptococcal infections: Temporal relationships between bacterial acquisition, infection onset, clinical findings, and outcome           | Wrong study design   |
| Ichiyama, 1997   | Transmission of Streptococcus pyogenes causing toxic shock-like syndrome among family members and confirmation by DNA macrorestriction analysis                     | Wrong study design   |
| Idubor, 2019     | Invasive group a streptococcus infections among residents of multiple nursing Homes-Denver, Colorado, 2017-2018                                                     | Wrong study design   |
| Ikebe, 2015      | Increased prevalence of group A streptococcus isolates in streptococcal toxic shock syndrome cases in Japan from 2010 to 2012                                       | Wrong study design   |
| Klinker, 1997    | Toxic shock syndrome in AIDS                                                                                                                                        | Wrong study design   |
| Langmuir, 1982   | Toxic-shock syndrome--an epidemiologist's view                                                                                                                      | Wrong study design   |
| McIvor, 1982     | Treatment of recurrent toxic shock syndrome with oral contraceptive agents                                                                                          | Wrong study design   |
| Pathi, 2013      | Prompt recognition and multidisciplinary approach in Group A streptococcal sepsis                                                                                   | Wrong study design   |
| Shah, 2015       | Role of intravenous immune globulin in streptococcal toxic shock syndrome and Clostridium difficile infection                                                       | Wrong study design   |
| Stallones, 1982  | A review of the epidemiologic studies of toxic shock syndrome                                                                                                       | Wrong study design   |
| Stevens, 2000    | Molecular epidemiology of nga and NAD glycohydrolase/ADP-ribosyltransferase activity among Streptococcus pyogenes causing streptococcal toxic shock syndrome        | Wrong study design   |
| Turner, 2015     | Emergence of a New Highly Successful Acapsular Group A Streptococcus Clade of Genotype emm89 in the United Kingdom                                                  | Wrong study design   |
| Udagawa, 1999    | Serious group A streptococcal infection around delivery                                                                                                             | Wrong study design   |
| Valiquette, 2006 | A survey of physician's attitudes regarding management of severe group A streptococcal infections                                                                   | Wrong study design   |
| Valiquette, 2009 | Assessing the impact of intravenous immunoglobulin in the management of streptococcal toxic shock syndrome: a noble but difficult quest                             | Wrong study design   |
| Wozniak, 2012    | M-protein gene-type distribution and hyaluronic acid capsule in group A Streptococcus clinical isolates in Chile: Association of emm gene markers with csrR alleles | Wrong study design   |
| Anonymous, 1984  | Diagnostic bias and toxic shock syndrome                                                                                                                            | Wrong study design   |
| Blonde, 2017     | A prospective multicentric study of severe cutaneous infections in pediatric intensive care: The SCIPIC cohort                                                      | Wrong study design   |
| Busowski, 2010   | Puerperal group A streptococci (GAS) infection: Reemergence of a dreaded disease - A case series                                                                    | Wrong study design   |
| Cimolai, 2002    | Nonhemolytic Streptococcus pyogenes causing invasive infection                                                                                                      | Wrong study design   |
| Clark, 2010      | Puerperal group a streptococcal sepsis and proinflammatory immune response                                                                                          | Wrong study design   |

|    |                       |                                                                                                                                                                                              |                    |
|----|-----------------------|----------------------------------------------------------------------------------------------------------------------------------------------------------------------------------------------|--------------------|
| 1  |                       |                                                                                                                                                                                              |                    |
| 2  |                       |                                                                                                                                                                                              |                    |
| 3  |                       |                                                                                                                                                                                              |                    |
| 4  | Dahdi, 2018           | Necrotizing soft tissue infection: Microbiological distribution from district region                                                                                                         | Wrong study design |
| 5  |                       |                                                                                                                                                                                              |                    |
| 6  | Das, 2012             | Necrotizing fasciitis in New Zealand - Risk factors, microbiological findings and outcomes in a large case series                                                                            | Wrong study design |
| 7  |                       |                                                                                                                                                                                              |                    |
| 8  | De Zoysa, 2013        | Invasive group A streptococcal disease in the UK, 2008-2012 and molecular characterisation of isolates during enhanced surveillance                                                          | Wrong study design |
| 9  |                       |                                                                                                                                                                                              |                    |
| 10 |                       |                                                                                                                                                                                              |                    |
| 11 | Donawa, 1984          | Toxic shock syndrome: chronology of state and federal epidemiologic studies and regulatory decision-making                                                                                   | Wrong study design |
| 12 |                       |                                                                                                                                                                                              |                    |
| 13 | Figueira, 2013        | Peri-ocular necrotising fasciitis: A multicentre retrospective australian series                                                                                                             | Wrong study design |
| 14 |                       |                                                                                                                                                                                              |                    |
| 15 | Gaensbauer, 2016      | Importance of toxic shock syndrome in pediatric septic shock clinical decision-making                                                                                                        | Wrong study design |
| 16 |                       |                                                                                                                                                                                              |                    |
| 17 | Goldberg, 2015        | Group A beta streptococcal infections in children after oral or dental trauma: A case series of 5 patients                                                                                   | Wrong study design |
| 18 |                       |                                                                                                                                                                                              |                    |
| 19 | McViety, 2014         | Don't forget IGAS: Lessons learnt from review of 2 peak seasons in the north west and North Wales, UK                                                                                        | Wrong study design |
| 20 |                       |                                                                                                                                                                                              |                    |
| 21 | Zangara, 2019         | Epidemiology, outcomes from treatment, and the spectrum of soft tissue infections over time in hospitalized patients: A populationbased description of inpatients in the state of california | Wrong study design |
| 22 |                       |                                                                                                                                                                                              |                    |
| 23 | Arias-Constanti, 2018 | Invasive disease by Streptococcus pyogenes: patients hospitalized for 6 years                                                                                                                | Wrong population   |
| 24 |                       |                                                                                                                                                                                              |                    |
| 25 | Hankins, 2008         | Factors that affect the clinical course of group A beta-haemolytic streptococcal infections of the hand and upper extremity: a retrospective study                                           | Wrong population   |
| 26 |                       |                                                                                                                                                                                              |                    |
| 27 | Henrichsen, 1997      | Invasive infections caused by Streptococcus pyogenes in Denmark 1990- 1994                                                                                                                   | Wrong population   |
| 28 |                       |                                                                                                                                                                                              |                    |
| 29 | Hoge, 1993            | The changing epidemiology of invasive group A streptococcal infections and the emergence of streptococcal toxic shock-like syndrome. A retrospective population-based study                  | Wrong population   |
| 30 |                       |                                                                                                                                                                                              |                    |
| 31 | Jauregui, 2015        | Life- and limb-threatening infections following the use of an external fixator                                                                                                               | Wrong population   |
| 32 |                       |                                                                                                                                                                                              |                    |
| 33 | Kadri, 2017           | Impact of Intravenous Immunoglobulin on Survival in Necrotizing Fasciitis With Vasopressor-Dependent Shock: A Propensity Score-Matched Analysis From 130 US Hospitals                        | Wrong population   |
| 34 |                       |                                                                                                                                                                                              |                    |
| 35 | Leggiadro, 1993       | Group A streptococcal bacteremia in a mid-south children's hospital                                                                                                                          | Wrong population   |
| 36 |                       |                                                                                                                                                                                              |                    |
| 37 | Madsen, 2019          | Patient's characteristics and outcomes in necrotising soft-tissue infections: results from a Scandinavian, multicentre, prospective cohort study                                             | Wrong population   |
| 38 |                       |                                                                                                                                                                                              |                    |
| 39 | Mitchell, 2011        | A strep in the wrong direction-invasive group a streptococcal disease                                                                                                                        | Wrong population   |
| 40 |                       |                                                                                                                                                                                              |                    |
| 41 | Moses, 1995           | Group A streptococcus bacteremia at the Hadassah Medical Center in Jerusalem                                                                                                                 | Wrong population   |
| 42 |                       |                                                                                                                                                                                              |                    |
| 43 | Mosites, 2017         | Use of single-dose azithromycin to control a community outbreak of EMM26.3 group a streptococcus invasive disease-Alaska, 2017                                                               | Wrong population   |
| 44 |                       |                                                                                                                                                                                              |                    |
| 45 | Mosites, 2019         | Risk for invasive streptococcal infections among adults experiencing homelessness, anchorage, Alaska, USA, 2002-2015                                                                         | Wrong population   |
| 46 |                       |                                                                                                                                                                                              |                    |
| 47 |                       |                                                                                                                                                                                              |                    |
| 48 |                       |                                                                                                                                                                                              |                    |
| 49 |                       |                                                                                                                                                                                              |                    |
| 50 |                       |                                                                                                                                                                                              |                    |
| 51 |                       |                                                                                                                                                                                              |                    |
| 52 |                       |                                                                                                                                                                                              |                    |
| 53 |                       |                                                                                                                                                                                              |                    |
| 54 |                       |                                                                                                                                                                                              |                    |
| 55 |                       |                                                                                                                                                                                              |                    |
| 56 |                       |                                                                                                                                                                                              |                    |
| 57 |                       |                                                                                                                                                                                              |                    |
| 58 |                       |                                                                                                                                                                                              |                    |
| 59 |                       |                                                                                                                                                                                              |                    |
| 60 |                       |                                                                                                                                                                                              |                    |

|    |                |                                                                                                                                                                            |
|----|----------------|----------------------------------------------------------------------------------------------------------------------------------------------------------------------------|
| 1  |                |                                                                                                                                                                            |
| 2  |                |                                                                                                                                                                            |
| 3  |                |                                                                                                                                                                            |
| 4  | Mulla, 2007    | Clinical and epidemiologic features of invasive group A streptococcal infections in children                                                                               |
| 5  |                | Wrong population                                                                                                                                                           |
| 6  | Mulla, 2003    | Invasive group A streptococcal infections in Florida                                                                                                                       |
| 7  |                | Wrong population                                                                                                                                                           |
| 8  | Navarro, 1993  | A comparison of Streptococcus pyogenes (group A streptococcal) bacteremia at an urban and a suburban hospital. The importance of intravenous drug use                      |
| 9  |                | Wrong population                                                                                                                                                           |
| 10 | Norton, 2004   | Invasive group A streptococcal disease in North Queensland (1996 - 2001)                                                                                                   |
| 11 |                | Wrong population                                                                                                                                                           |
| 12 | Nuwayhid, 2007 | Blunt Trauma as a Risk Factor for Group A Streptococcal Necrotizing Fasciitis                                                                                              |
| 13 |                | Wrong population                                                                                                                                                           |
| 14 | Oliver, 2019   | Invasive group A Streptococcus disease in Australian children: 2016 to 2018 - a descriptive cohort study                                                                   |
| 15 |                | Wrong population                                                                                                                                                           |
| 16 | Oliver, 2019   | Recent trends in invasive group A Streptococcus disease in Victoria                                                                                                        |
| 17 |                | Wrong population                                                                                                                                                           |
| 18 | Peterson, 1996 | Risk factors for invasive group A streptococcal infections in children with varicella: A case-control study                                                                |
| 19 |                | Wrong population                                                                                                                                                           |
| 20 | Rainbow, 2008  | Invasive group A streptococcal disease in nursing homes, Minnesota, 1995-2006                                                                                              |
| 21 |                | Wrong population                                                                                                                                                           |
| 22 | Rathore, 1992  | Suppurative group A beta-hemolytic streptococcal infections in children                                                                                                    |
| 23 |                | Wrong population                                                                                                                                                           |
| 24 | Reingold, 1984 | Epidemiology of toxic-shock syndrome, United States, 1960-1984                                                                                                             |
| 25 |                | Wrong population                                                                                                                                                           |
| 26 | Reingold, 1989 | Risk factors for menstrual toxic shock syndrome: results of a multistate case-control study                                                                                |
| 27 |                | Wrong population                                                                                                                                                           |
| 28 | Remy, 2019     | Septic shock and toxic shock syndrome-two infectious shocks with different immune response                                                                                 |
| 29 |                | Wrong population                                                                                                                                                           |
| 30 | Rudolph, 2016  | Epidemiology of invasive group a streptococcal disease in Alaska, 2001 to 2013                                                                                             |
| 31 |                | Wrong population                                                                                                                                                           |
| 32 | Saldana, 2010  | Periorbital necrotizing fasciitis: Outcomes using a CT-guided surgical debridement approach                                                                                |
| 33 |                | Wrong population                                                                                                                                                           |
| 34 | Sarangi, 1995  | A nursing home outbreak of group A streptococcal infection: case control study of environmental contamination                                                              |
| 35 |                | Wrong population                                                                                                                                                           |
| 36 | Scaber, 2011   | Group a streptococcal infections during the seasonal influenza outbreak 2010/11 in South East England                                                                      |
| 37 |                | Wrong population                                                                                                                                                           |
| 38 | Scheuer, 2018  | Rising high rate of invasive group a streptococcus infections among persons experiencing homelessness in San Francisco, 2010-2017                                          |
| 39 |                | Wrong population                                                                                                                                                           |
| 40 | Schlech, 1982  | Risk factors for development of toxic shock syndrome. Association with a tampon brand                                                                                      |
| 41 |                | Wrong population                                                                                                                                                           |
| 42 | Schwartz, 1989 | Nonmenstrual toxic shock syndrome associated with barrier contraceptives: report of a case-control study                                                                   |
| 43 |                | Wrong population                                                                                                                                                           |
| 44 | Shands, 1982   | Toxic shock syndrome: Case-control studies at the centers for disease control                                                                                              |
| 45 |                | Wrong population                                                                                                                                                           |
| 46 | Sharma, 2019   | Real-time whole genome sequencing to control a Streptococcus pyogenes outbreak at a national orthopaedic hospital                                                          |
| 47 |                | Wrong population                                                                                                                                                           |
| 48 | Sierra, 2006   | Group A streptococcal infections in injection drug users in Barcelona, Spain: Epidemiologic, clinical, and microbiologic analysis of 3 clusters of cases from 2000 to 2003 |
| 49 |                | Wrong population                                                                                                                                                           |
| 50 |                |                                                                                                                                                                            |
| 51 |                |                                                                                                                                                                            |
| 52 |                |                                                                                                                                                                            |
| 53 |                |                                                                                                                                                                            |
| 54 |                |                                                                                                                                                                            |
| 55 |                |                                                                                                                                                                            |
| 56 |                |                                                                                                                                                                            |
| 57 |                |                                                                                                                                                                            |
| 58 |                |                                                                                                                                                                            |
| 59 |                |                                                                                                                                                                            |
| 60 |                |                                                                                                                                                                            |

|                        |                                                                                                                                                                                             |                  |
|------------------------|---------------------------------------------------------------------------------------------------------------------------------------------------------------------------------------------|------------------|
| Simonart, 2004         | The importance of serum creatine phosphokinase level in the early diagnosis and microbiological evaluation of necrotizing fasciitis                                                         | Wrong population |
| Smith, 2003            | Mass antibiotic treatment for group A streptococcus outbreaks in two long-term care facilities                                                                                              | Wrong population |
| Spargen, 2011          | Proinflammatory immune response and puerperal group a streptococcal sepsis                                                                                                                  | Wrong population |
| Steer, 2009            | Prospective surveillance of invasive group A streptococcal disease, fiji, 2005-2007                                                                                                         | Wrong population |
| Steer, 2008            | High burden of invasive beta-haemolytic streptococcal infections in Fiji                                                                                                                    | Wrong population |
| Tanna, 2006            | Molecular characterization of clinical isolates of M non-typable group A streptococci from invasive disease cases                                                                           | Wrong population |
| Tapiainen, 2016        | Invasive Group A Streptococcal Infections in Children: A Nationwide Survey in Finland                                                                                                       | Wrong population |
| Thanert, 2019          | Molecular profiling of tissue biopsies reveals unique signatures associated with streptococcal necrotizing soft tissue infections                                                           | Wrong population |
| Theis, 2002            | Severe necrotising soft tissue infections in orthopaedic surgery                                                                                                                            | Wrong population |
| Thigpen, 2007          | Nursing home outbreak of invasive group A streptococcal infections caused by 2 distinct strains                                                                                             | Wrong population |
| Urbina, 2019           | Early identification of patients at high risk of group A streptococcus-associated necrotizing skin and soft tissue infections: a retrospective cohort study                                 | Wrong population |
| Vasant, 2019           | Mass prophylaxis in an outbreak of invasive group A streptococcal disease in a residential aged care facility                                                                               | Wrong population |
| Vlaminckx, 2005        | Long-term surveillance of invasive group A streptococcal disease in The Netherlands, 1994-2003                                                                                              | Wrong population |
| Vugia, 1996            | Invasive group A streptococcal infections in children with varicella in Southern California                                                                                                 | Wrong population |
| Waldhausen, 1996       | Surgical implications of necrotizing fasciitis in children with chickenpox                                                                                                                  | Wrong population |
| Watanabe-Ohnishi, 1995 | Selective depletion of V beta-bearing T cells in patients with severe invasive group A streptococcal infections and streptococcal toxic shock syndrome. Ontario Streptococcal Study Project | Wrong population |
| Wheeler, 1991          | Outbreak of group A streptococcus septicemia in children: Clinical, epidemiologic, and microbiological correlates                                                                           | Wrong population |
| Wilson, 1995           | Group A streptococcal necrotizing fasciitis following varicella in children: Case reports and review                                                                                        | Wrong population |
| Wong, 2019             | A Cluster of Pediatric Invasive Group A Streptococcus Disease in Melbourne, Australia, Coinciding with a High-Burden Influenza Season                                                       | Wrong population |
| Yagupsky, 1987         | Group A beta-hemolytic streptococcal bacteremia in children                                                                                                                                 | Wrong population |
| Zerr, 1999             | A case-control study of necrotizing fasciitis during primary varicella                                                                                                                      | Wrong population |
| Zimbelman, 1999        | Improved outcome of clindamycin compared with beta-lactam antibiotic treatment for invasive Streptococcus pyogenes infection                                                                | Wrong population |

|    |                      |                                                                                                                                                                                      |                  |
|----|----------------------|--------------------------------------------------------------------------------------------------------------------------------------------------------------------------------------|------------------|
| 1  |                      |                                                                                                                                                                                      |                  |
| 2  |                      |                                                                                                                                                                                      |                  |
| 3  |                      |                                                                                                                                                                                      |                  |
| 4  |                      | Distribution of emm types of beta hemolytic streptococci associated with necrotizing fasciitis: Clinical profile and outcome                                                         |                  |
| 5  | Abraham, 2016        |                                                                                                                                                                                      | Wrong population |
| 6  |                      | Severe Maternal Sepsis in the UK, 2011-2012: A National Case-Control Study                                                                                                           |                  |
| 7  | Acosta, 2014         |                                                                                                                                                                                      | Wrong population |
| 8  |                      | Investigation into an outbreak of invasive Group A Streptococcal (iGAS) infection at a general hospital in 2010                                                                      |                  |
| 9  | Adams, 2010          |                                                                                                                                                                                      | Wrong population |
| 10 |                      | Identification of invasive streptococcal disease in a pediatric and infant death Cohort-Iowa, 2007-2008                                                                              |                  |
| 11 | Adem, 2009           |                                                                                                                                                                                      | Wrong population |
| 12 |                      | Acute necrotizing fasciitis in Egyptian patients: A case series                                                                                                                      |                  |
| 13 | Afifi, 2008          |                                                                                                                                                                                      | Wrong population |
| 14 |                      | Group A Streptococcal bacteraemia. Experience at King Fahad Medical City in Riyadh, Saudi Arabia                                                                                     |                  |
| 15 | Al-Khadidi, 2017     |                                                                                                                                                                                      | Wrong population |
| 16 |                      | Necrotising fasciitis: A series of seven cases                                                                                                                                       |                  |
| 17 | Alva, 2013           |                                                                                                                                                                                      | Wrong population |
| 18 |                      | Summaries for patients. Invasive streptococcal infections in hospitals in Ontario, Canada, 1992 to 2000                                                                              |                  |
| 19 | Anonymous, 2007      |                                                                                                                                                                                      | Wrong population |
| 20 |                      | Postpartum invasive group A streptococcal disease in the modern era                                                                                                                  |                  |
| 21 | Aronoff, 2008        |                                                                                                                                                                                      | Wrong population |
| 22 |                      | Pivotal Role of Preexisting Pathogen-Specific Antibodies in the Development of Necrotizing Soft-Tissue Infections                                                                    |                  |
| 23 | Babbar, 2018         |                                                                                                                                                                                      | Wrong population |
| 24 |                      | A serological evaluation of the host immune response during Necrotizing Soft Tissue Infections caused by Streptococcus pyogenes                                                      |                  |
| 25 | Babbar, 2016         |                                                                                                                                                                                      | Wrong population |
| 26 |                      | Impact of adjunctive clindamycin in invasive beta-hemolytic streptococcal infections: A propensity score-matched analysis of 1956 beta-lactam treated patients from 118 us hospitals |                  |
| 27 | Babiker, 2019        |                                                                                                                                                                                      | Wrong population |
| 28 |                      | Chemotherapy of acute bone and joint infections                                                                                                                                      |                  |
| 29 | Bajpai, 1977         |                                                                                                                                                                                      | Wrong population |
| 30 |                      | Bacteraemic Streptococcus pyogenes infection in the peripartum period: now a rare disease and prior carriage by the patient may be important                                         |                  |
| 31 | Barnham, 2001        |                                                                                                                                                                                      | Wrong population |
| 32 |                      | Risk factors in the pathogenesis of invasive group A streptococcal infections: Role of protective humoral immunity                                                                   |                  |
| 33 | Basma, 1999          |                                                                                                                                                                                      | Wrong population |
| 34 |                      | Maternal deaths due to sepsis in the state of Michigan, 1999-2006                                                                                                                    |                  |
| 35 | Bauer, 2015          |                                                                                                                                                                                      | Wrong population |
| 36 |                      | Invasive group A Streptococcus infections associated with liposuction surgery at outpatient facilities not subject to state or federal regulation                                    |                  |
| 37 | Beaudoin, 2014       |                                                                                                                                                                                      | Wrong population |
| 38 |                      | Postoperative complications followed by septoplasty comparison between conventional nasal packing and glove finger pack                                                              |                  |
| 39 | Beigh, 2012          |                                                                                                                                                                                      | Wrong population |
| 40 |                      | The relationship of tampon characteristics to menstrual toxic shock syndrome                                                                                                         |                  |
| 41 | Berkley, 1987        |                                                                                                                                                                                      | Wrong population |
| 42 |                      | Necrotizing fasciitis in children: diagnostic and therapeutic aspects                                                                                                                |                  |
| 43 | Bingol-Kologlu, 2007 |                                                                                                                                                                                      | Wrong population |
| 44 |                      | Necrotizing soft tissue infections caused by Streptococcus pyogenes and Streptococcus dysgalactiae subsp. equisimilis of groups C and G in western Norway                            |                  |
| 45 | Bruun, 2013          |                                                                                                                                                                                      | Wrong population |
| 46 |                      | Risk factors and Predictors of Mortality in Streptococcal Necrotizing Soft-Tissue Infections: A Multicenter Prospective Study                                                        |                  |
| 47 | Bruun, 2020          |                                                                                                                                                                                      | Wrong population |
| 48 |                      |                                                                                                                                                                                      |                  |
| 49 |                      |                                                                                                                                                                                      |                  |
| 50 |                      |                                                                                                                                                                                      |                  |
| 51 |                      |                                                                                                                                                                                      |                  |
| 52 |                      |                                                                                                                                                                                      |                  |
| 53 |                      |                                                                                                                                                                                      |                  |
| 54 |                      |                                                                                                                                                                                      |                  |
| 55 |                      |                                                                                                                                                                                      |                  |
| 56 |                      |                                                                                                                                                                                      |                  |
| 57 |                      |                                                                                                                                                                                      |                  |
| 58 |                      |                                                                                                                                                                                      |                  |
| 59 |                      |                                                                                                                                                                                      |                  |
| 60 |                      |                                                                                                                                                                                      |                  |

|    |                           |                                                                                                                                                              |                  |
|----|---------------------------|--------------------------------------------------------------------------------------------------------------------------------------------------------------|------------------|
| 1  |                           |                                                                                                                                                              |                  |
| 2  |                           |                                                                                                                                                              |                  |
| 3  |                           |                                                                                                                                                              |                  |
| 4  | Busowski, 2013            | Puerperal group a streptococcal infections: A case series and discussion                                                                                     | Wrong population |
| 5  |                           |                                                                                                                                                              |                  |
| 6  | Byer, 2006                | Clinical deterioration among patients with fever and erythroderma                                                                                            | Wrong population |
| 7  |                           |                                                                                                                                                              |                  |
| 8  | Centers for Disease, 1982 | Toxic-shock syndrome, United States, 1970-1982                                                                                                               | Wrong population |
| 9  |                           |                                                                                                                                                              |                  |
| 10 | Centers for Disease, 2011 | Invasive group A streptococcus in a skilled nursing facility-- Pennsylvania, 2009-2010                                                                       | Wrong population |
| 11 |                           |                                                                                                                                                              |                  |
| 12 | Chan, 2009                | Toxic shock syndrome and rhinosinusitis in children                                                                                                          | Wrong population |
| 13 |                           |                                                                                                                                                              |                  |
| 14 | Chen, 2011                | The microbiological profile and presence of bloodstream infection influence mortality rates in necrotizing fasciitis                                         | Wrong population |
| 15 |                           |                                                                                                                                                              |                  |
| 16 | Chen, 2015                | Clinical Characteristics and Risk Factor Analysis for Lower-Extremity Amputations in Diabetic Patients With Foot Ulcer Complicated by Necrotizing Fasciitis  | Wrong population |
| 17 |                           |                                                                                                                                                              |                  |
| 18 | Chen, 2018                | Macro- and Microvascular Parameters After Toxic Shock Syndrome                                                                                               | Wrong population |
| 19 |                           |                                                                                                                                                              |                  |
| 20 | Ching, 2019               | Prospective surveillance of pediatric invasive group A Streptococcus infection                                                                               | Wrong population |
| 21 |                           |                                                                                                                                                              |                  |
| 22 | Chiobotaru, 1997          | Changing epidemiology of invasive Streptococcus pyogenes infections in southern Israel: differences between two ethnic population groups                     | Wrong population |
| 23 |                           |                                                                                                                                                              |                  |
| 24 | Christie, 1988            | Bacteremia with group A streptococci in childhood                                                                                                            | Wrong population |
| 25 |                           |                                                                                                                                                              |                  |
| 26 | Corona, 2016              | Necrotising fasciitis of the extremities: implementation of new management technologies                                                                      | Wrong population |
| 27 |                           |                                                                                                                                                              |                  |
| 28 |                           |                                                                                                                                                              |                  |
| 29 | Daneman, 2007             | Surveillance for hospital outbreaks of invasive group a streptococcal infections in Ontario, Canada, 1992 to 2000                                            | Wrong population |
| 30 |                           |                                                                                                                                                              |                  |
| 31 | Daneman, 2005             | Hospital-acquired invasive group A streptococcal infections in Ontario, Canada, 1992-2000                                                                    | Wrong population |
| 32 |                           |                                                                                                                                                              |                  |
| 33 |                           |                                                                                                                                                              |                  |
| 34 | Davies, 1996              | Invasive group A streptococcal infections in Ontario, Canada. Ontario Group A Streptococcal Study Group                                                      | Wrong population |
| 35 |                           |                                                                                                                                                              |                  |
| 36 | Davis, 1982               | Toxic shock syndrome: a critique of the 1980 Wisconsin case-control study                                                                                    | Wrong population |
| 37 |                           |                                                                                                                                                              |                  |
| 38 | De Almeida Torres, 2013   | Group a streptococcus meningitis in children                                                                                                                 | Wrong population |
| 39 |                           |                                                                                                                                                              |                  |
| 40 |                           |                                                                                                                                                              |                  |
| 41 | Deutscher, 2011           | Incidence and severity of invasive Streptococcus pneumoniae, group A Streptococcus, and group B Streptococcus infections among pregnant and postpartum women | Wrong population |
| 42 |                           |                                                                                                                                                              |                  |
| 43 | Devaney, 2015             | Necrotising soft tissue infections: The effect of hyperbaric oxygen on mortality                                                                             | Wrong population |
| 44 |                           |                                                                                                                                                              |                  |
| 45 |                           |                                                                                                                                                              |                  |
| 46 | Dooling, 2013             | Investigation of a prolonged Group A Streptococcal outbreak among residents of a skilled nursing facility, Georgia, 2009-2012                                | Wrong population |
| 47 |                           |                                                                                                                                                              |                  |
| 48 | Dworkin, 2009             | The epidemiology of necrotizing fasciitis including factors associated with death and amputation                                                             | Wrong population |
| 49 |                           |                                                                                                                                                              |                  |
| 50 |                           |                                                                                                                                                              |                  |
| 51 | Eneli, 2007               | Epidemiology and Outcome of Necrotizing Fasciitis in Children: An Active Surveillance Study of the Canadian Paediatric Surveillance Program                  | Wrong population |
| 52 |                           |                                                                                                                                                              |                  |
| 53 | Factor, 2005              | Risk factors for pediatric invasive group A streptococcal disease                                                                                            | Wrong population |
| 54 |                           |                                                                                                                                                              |                  |
| 55 | Factor, 2003              | Invasive group a streptococcal disease: Risk factors for adults                                                                                              | Wrong population |
| 56 |                           |                                                                                                                                                              |                  |
| 57 |                           |                                                                                                                                                              |                  |
| 58 |                           |                                                                                                                                                              |                  |
| 59 |                           |                                                                                                                                                              |                  |
| 60 |                           |                                                                                                                                                              |                  |



|    |                    |                                                                                                                                                                    |                                                                               |
|----|--------------------|--------------------------------------------------------------------------------------------------------------------------------------------------------------------|-------------------------------------------------------------------------------|
| 1  |                    |                                                                                                                                                                    |                                                                               |
| 2  |                    |                                                                                                                                                                    |                                                                               |
| 3  |                    |                                                                                                                                                                    |                                                                               |
| 4  | Fauno Thrane, 2017 | Hyperbaric oxygen may only be optional in head and neck necrotizing fasciitis: a retrospective analysis of 43 cases and review of the literature                   | Wrong population                                                              |
| 5  |                    |                                                                                                                                                                    |                                                                               |
| 6  | Fichtenbaum, 1993  | Ehrlichiosis presenting as a life-threatening illness with features of the toxic shock syndrome                                                                    | Wrong population                                                              |
| 7  |                    |                                                                                                                                                                    |                                                                               |
| 8  | Flavahan, 2014     | Incidence of periorbital necrotising fasciitis in the UK population: A BOSU study                                                                                  | Wrong population                                                              |
| 9  |                    |                                                                                                                                                                    |                                                                               |
| 10 | Flores, 2019       | Capsule-negative EMM types are an increasing cause of pediatric group a streptococcal infections at a large pediatric hospital in Texas                            | Wrong population                                                              |
| 11 |                    |                                                                                                                                                                    |                                                                               |
| 12 | Frere, 2016        | Clinical and Microbiological Characteristics of Invasive Group A Streptococcal Infections Before and After Implementation of a Universal Varicella Vaccine Program | Wrong population                                                              |
| 13 |                    |                                                                                                                                                                    |                                                                               |
| 14 | Givner, 1998       | Invasive disease due to group A beta-hemolytic streptococci: Continued occurrence in children in North Carolina                                                    | Wrong population                                                              |
| 15 |                    |                                                                                                                                                                    |                                                                               |
| 16 | Givner, 1991       | Apparent increase in the incidence of invasive group A beta-hemolytic streptococcal disease in children                                                            | Wrong population                                                              |
| 17 |                    |                                                                                                                                                                    |                                                                               |
| 18 | Gooskens, 2005     | Streptococcal toxic shock syndrome by an iMLS resistant M type 77 Streptococcus pyogenes in the Netherlands                                                        | Wrong population                                                              |
| 19 |                    |                                                                                                                                                                    |                                                                               |
| 20 | Gonzalez, 1996     | Necrotizing fasciitis of the upper extremity                                                                                                                       | Wrong population                                                              |
| 21 |                    |                                                                                                                                                                    |                                                                               |
| 22 | Lesko, 2001        | Invasive group A streptococcal infection and nonsteroidal antiinflammatory drug use among children with primary varicella                                          | Wrong population                                                              |
| 23 |                    |                                                                                                                                                                    |                                                                               |
| 24 | Lin, 2013          | Group a streptococcal necrotizing fasciitis in the emergency department                                                                                            | Wrong population                                                              |
| 25 |                    |                                                                                                                                                                    |                                                                               |
| 26 | Lin, 2015          | Early Differentiation of Kawasaki Disease Shock Syndrome and Toxic Shock Syndrome in a Pediatric Intensive Care Unit                                               | Wrong population                                                              |
| 27 |                    |                                                                                                                                                                    |                                                                               |
| 28 | Parks, 2019        | Elevated risk of invasive group A streptococcal disease and host genetic variation in the human leucocyte antigen locus                                            | Wrong population                                                              |
| 29 |                    |                                                                                                                                                                    |                                                                               |
| 30 | Stromberg, 1991    | Outbreak of group A streptococcal bacteremia in Sweden: an epidemiologic and clinical study                                                                        | Wrong population                                                              |
| 31 |                    |                                                                                                                                                                    |                                                                               |
| 32 | Haggar, 2012       | Clinical and microbiologic characteristics of invasive Streptococcus pyogenes infections in north and south India                                                  | Relationship between prognostic factor and outcome not reported or quantified |
| 33 |                    |                                                                                                                                                                    |                                                                               |
| 34 | Laupland, 2000     | Invasive group A streptococcal disease in children and association with varicella-zoster virus infection. Ontario Group A Streptococcal Study Group                | Relationship between prognostic factor and outcome not reported or quantified |
| 35 |                    |                                                                                                                                                                    |                                                                               |
| 36 | Linnemann, 1986    | Increasing incidence of toxic shock syndrome in the 1970s                                                                                                          | Relationship between prognostic factor and outcome not reported or quantified |
| 37 |                    |                                                                                                                                                                    |                                                                               |
| 38 | Miday, 1988        | Toxic shock syndrome: incidence and geographic distribution from a hospital medical records reporting system                                                       | Relationship between prognostic factor and outcome not reported or quantified |
| 39 |                    |                                                                                                                                                                    |                                                                               |
| 40 | Mosites, 2018      | Outbreak of Invasive Infections from Subtype emm26.3 Group A Streptococcus among Homeless Adults-Anchorage, Alaska, 2016-2017                                      | Relationship between prognostic factor and outcome not reported or quantified |
| 41 |                    |                                                                                                                                                                    |                                                                               |
| 42 |                    |                                                                                                                                                                    |                                                                               |
| 43 |                    |                                                                                                                                                                    |                                                                               |
| 44 |                    |                                                                                                                                                                    |                                                                               |
| 45 |                    |                                                                                                                                                                    |                                                                               |
| 46 |                    |                                                                                                                                                                    |                                                                               |
| 47 |                    |                                                                                                                                                                    |                                                                               |
| 48 |                    |                                                                                                                                                                    |                                                                               |
| 49 |                    |                                                                                                                                                                    |                                                                               |
| 50 |                    |                                                                                                                                                                    |                                                                               |
| 51 |                    |                                                                                                                                                                    |                                                                               |
| 52 |                    |                                                                                                                                                                    |                                                                               |
| 53 |                    |                                                                                                                                                                    |                                                                               |
| 54 |                    |                                                                                                                                                                    |                                                                               |
| 55 |                    |                                                                                                                                                                    |                                                                               |
| 56 |                    |                                                                                                                                                                    |                                                                               |
| 57 |                    |                                                                                                                                                                    |                                                                               |
| 58 |                    |                                                                                                                                                                    |                                                                               |
| 59 |                    |                                                                                                                                                                    |                                                                               |
| 60 |                    |                                                                                                                                                                    |                                                                               |

|                        |                                                                                                                                                               |                                                                               |
|------------------------|---------------------------------------------------------------------------------------------------------------------------------------------------------------|-------------------------------------------------------------------------------|
| O'Grady, 2007          | The epidemiology of invasive group A streptococcal disease in Victoria, Australia                                                                             | Relationship between prognostic factor and outcome not reported or quantified |
| Petitti, 1989          | Update through 1985 on the incidence of toxic shock syndrome among members of a prepaid health plan                                                           | Relationship between prognostic factor and outcome not reported or quantified |
| Pilon, 2019            | Invasive group A streptococcal infection outbreaks of typeemm118 in a long-term care facility, and of type emm74 in the homeless population, Montreal, Quebec | Relationship between prognostic factor and outcome not reported or quantified |
| Rantala, 2012          | Streptococcus pyogenes bacteraemia, emm types and superantigen profiles                                                                                       | Relationship between prognostic factor and outcome not reported or quantified |
| Tanner, 1981           | Toxic shock syndrome                                                                                                                                          | Relationship between prognostic factor and outcome not reported or quantified |
| Teatero, 2018          | Canada-Wide Epidemic of emm74 Group A Streptococcus Invasive Disease                                                                                          | Relationship between prognostic factor and outcome not reported or quantified |
| Todd, 1985             | Toxic shock syndrome. II. Estimated occurrence in Colorado as influenced by case ascertainment methods                                                        | Relationship between prognostic factor and outcome not reported or quantified |
| Tsai, 2014             | Correlation of virulence genes to clinical manifestations and outcome in patients with Streptococcus dysgalactiae subspecies equisimilis bacteremia           | Relationship between prognostic factor and outcome not reported or quantified |
| Vallalta Morales, 2006 | Group A streptococcal bacteremia: outcome and prognostic factors                                                                                              | Relationship between prognostic factor and outcome not reported or quantified |
| Vlaminckx, 2004        | Epidemiological features of invasive and noninvasive group A streptococcal disease in the Netherlands, 1992-1996                                              | Relationship between prognostic factor and outcome not reported or quantified |
| Aydin, 2017            | Clinical indications of intravenous immunoglobulin use in pediatric infectious diseases clinic                                                                | Relationship between prognostic factor and outcome not reported or quantified |
| Ben-Abraham, 2002      | Invasive group A streptococcal infections in a large tertiary center: epidemiology, characteristics and outcome                                               | Relationship between prognostic factor and outcome not reported or quantified |
| Bohicchio, 2001        | Group A Streptococcus (GAS) soft-tissue infections: a lethal organism on the rise                                                                             | Relationship between prognostic factor and outcome not reported or quantified |
| Cancellara, 2016       | Multicenter study on invasive Streptococcus pyogenes infections in children in Argentina                                                                      | Relationship between prognostic factor and                                    |

|                       |                                                                                                                                                      |                                                                               |
|-----------------------|------------------------------------------------------------------------------------------------------------------------------------------------------|-------------------------------------------------------------------------------|
|                       |                                                                                                                                                      | outcome not reported or quantified                                            |
| Chen, 2016            | Toxic shock syndrome in Australian children                                                                                                          | Relationship between prognostic factor and outcome not reported or quantified |
| Doctor, 1995          | Group A beta-hemolytic streptococcal bacteremia: historical overview, changing incidence, and recent association with varicella                      | Relationship between prognostic factor and outcome not reported or quantified |
| Eriksson, 2003        | Group A streptococcal infections in Sweden: a comparative study of invasive and noninvasive infections and analysis of dominant T28 emm28 isolates   | Relationship between prognostic factor and outcome not reported or quantified |
| Norrby-Teglund, 2003  | The treatment of severe group a streptococcal infections                                                                                             | Relationship between prognostic factor and outcome not reported or quantified |
| Rodriguez-Nunez, 2011 | Clinical characteristics of children with group A streptococcal toxic shock syndrome admitted to pediatric intensive care units                      | Relationship between prognostic factor and outcome not reported or quantified |
| Snall, 2016           | Differential neutrophil responses to bacterial stimuli: Streptococcal strains are potent inducers of heparin-binding protein and resistin-release    | Relationship between prognostic factor and outcome not reported or quantified |
| Eriksson, 1998        | Epidemiological and clinical aspects of invasive group A streptococcal infections and the streptococcal toxic shock syndrome                         | Relationship between prognostic factor and outcome not reported or quantified |
| Sahli, 2014           | Necrotizing fasciitis in diabetic patients: A report of 14 cases                                                                                     | Not in English                                                                |
| Arnholm, 2004         | High-dose immunoglobulin - Life-saving in invasive group a streptococcal infection                                                                   | Not in English                                                                |
| Caetano, 2010         | [S. Pyogenes invasive disease in a paediatric hospital: 1996-2009]                                                                                   | Not in English                                                                |
| Costa Orvay, 2007     | [Toxic shock syndrome: experience in a pediatric intensive care unit]                                                                                | Not in English                                                                |
| Dosil Gallardo, 2009  | [Streptococcal toxic shock syndrome: an emerging pathology?]                                                                                         | Not in English                                                                |
| Emmi, 1999            | Severe infection from invasive beta-hemolytic streptococcus group A. Three cases of toxic shock observed in resuscitation                            | Not in English                                                                |
| Faye, 2014            | Management of severe invasive group A streptococcal infections                                                                                       | Not in English                                                                |
| Floret, 2001          | Clinical aspects of staphylococcal and streptococcal toxic diseases                                                                                  | Not in English                                                                |
| Hua, 2018             | [Streptococcal toxic shock syndrome caused by Streptococcus pyogenes: a retrospective study of 15 pediatric cases]                                   | Not in English                                                                |
| Kach, 1993            | [Necrotizing soft tissue infections]                                                                                                                 | Not in English                                                                |
| Kaul, 1999            | Intravenous immunoglobulin therapy for streptococcal toxic shock syndrome--a comparative observational study. The Canadian Streptococcal Study Group | Duplicate                                                                     |
| Salinas, 2005         | Immunoglobulins in sepsis and septic shock                                                                                                           | Not in English                                                                |

|                        |                                                                                                                                                                            |                    |
|------------------------|----------------------------------------------------------------------------------------------------------------------------------------------------------------------------|--------------------|
| Shands, 1982           | Toxic shock syndrome: case-control studies at the Centers for Disease Control                                                                                              | Duplicate          |
| Sierra, 2006           | Group A streptococcal infections in injection drug users in Barcelona, Spain: epidemiologic, clinical, and microbiologic analysis of 3 clusters of cases from 2000 to 2003 | Duplicate          |
| Urbina, 2019           | Early identification of patients at high risk of group A streptococcus-associated necrotizing skin and soft tissue infections: A retrospective cohort study                | Duplicate          |
| Vallalta-Morales, 2005 | [Streptococcal toxic shock syndrome: ten years' experience at a tertiary hospital]                                                                                         | Not in English     |
| Vasant, 2019           | Mass prophylaxis in an outbreak of invasive group A streptococcal disease in a residential aged care facility                                                              | Duplicate          |
| Vugia, 1996            | Invasive group A streptococcal infections in children with varicella in Southern California                                                                                | Duplicate          |
| Zachariadou, 2014      | Differences in the epidemiology between paediatric and adult invasive <i>Streptococcus pyogenes</i> infections                                                             | Duplicate          |
| Bernard, 1995          | [Bacterial dermo-hypodermatitis in adults. Incidence and role of streptococcal etiology]                                                                                   | Not in English     |
| Bleton, 1991           | Necrotizing fasciitis of the upper limb. 12 cases                                                                                                                          | Not in English     |
| Bleton, 1991           | Necrotising fasciitis of the upper limb. Report of twelve cases                                                                                                            | Duplicate          |
| Fan, 2014              | [Clinical characteristics and antimicrobial resistance of invasive group A beta-hemolytic streptococcus infection in children]                                             | Not in English     |
| Fica, 2003             | Molecular epidemiology of a streptococcus pyogenes related nosocomial outbreak in a burn unit                                                                              | Not in English     |
| Fredlund, 1990         | [Increased frequency of group A hemolytic streptococci. Old age and immune deficiency among the risk factors]                                                              | Not in English     |
| Georgiev, 1993         | Puerperal streptococcal sepsis                                                                                                                                             | Not in English     |
| Khan, 2003             | Treatment of necrotizing fasciitis with quinolones                                                                                                                         | Wrong population   |
| Frosi, 1999            | Necrotizing fasciitis: A serious and uncommon alcohol related disease                                                                                                      | Wrong study design |
| Nedrebo, 2020          | Necrotizing Soft Tissue Infections: Case Reports, from the Clinician's Perspectives.                                                                                       | Wrong study design |
| Reicher, 2021          | 450 Obstetrically related group a streptococcal infection and predictors for severity - retrospective 12-year cohort study                                                 | Wrong study design |
| Bajpai, 2020           | Anti-microbial-resistance and profile of exotoxins of invasive beta-haemolytic-streptococci infections in trauma patients                                                  | Wrong population   |
| Adamkova, 2020         | Can gram-negative-like biomarker values in <i>Streptococcus pyogenes</i> sepsis negatively influence right choice of initial antibiotic therapy?                           | Wrong population   |
| Bandi, 2021            | Group A streptococcal infections in children                                                                                                                               | Wrong population   |
| Ceccato, 2020          | Use of corticosteroids in patients with severe CAP admitted to ICU, experience in a real-life setting                                                                      | Wrong population   |
| Tepper, 2021           | Long-term safety and tolerability of atogepant following once daily dosing over 1 year for the preventive treatment of migraine                                            | Wrong population   |

|                     |                                                                                                                                                                                                      |                                                                               |
|---------------------|------------------------------------------------------------------------------------------------------------------------------------------------------------------------------------------------------|-------------------------------------------------------------------------------|
| Melo, 2021          | Clinical, epidemiological and microbiological features of streptococcus pyogenes invasive infection - 10 year retrospective review                                                                   | Wrong population                                                              |
| Bringel, 2021       | Clinical characteristics and outcomes of children with toxic shock syndrome admitted to a pediatric intensive care unit: A case series                                                               | Wrong population                                                              |
| Neff, 2020          | Characterisation of clinical manifestations and treatment strategies for invasive beta-haemolytic streptococcal infections in a Swiss tertiary hospital.                                             | Wrong population                                                              |
| Urbina, 2020        | Assessing and applying individualized treatment for group A streptococcal necrotizing soft-tissue infection is possible                                                                              | Wrong population                                                              |
| Bergsten, 2020      | Correlation between immunoglobulin dose administered and plasma neutralization of streptococcal superantigens in patients with necrotizing soft tissue infections                                    | Wrong population                                                              |
| Boukthir, 2020      | A prospective survey of Streptococcus pyogenes infections in French Brittany from 2009 to 2017: Comprehensive dynamic of new emergent emm genotypes.                                                 | Wrong population                                                              |
| Escriva-Vidal, 2021 | Clinical Features and Outcomes of Streptococcus anginosus Group Infective Endocarditis: A Multicenter Matched Cohort Study.                                                                          | Wrong population                                                              |
| Babiker, 2021       | Effectiveness of adjunctive clindamycin in beta-lactam antibiotic-treated patients with invasive beta-haemolytic streptococcal infections in US hospitals: a retrospective multicentre cohort study. | Wrong population                                                              |
| Cui, 2021           | Necrotizing soft tissue infection: clinical characteristics, diagnosis, and management of 32 cases in Beijing.                                                                                       | Wrong population                                                              |
| Link-Gelles, 2020   | Characteristics of Intracranial Group A Streptococcal Infections in US Children, 1997-2014.                                                                                                          | Wrong population                                                              |
| Peetermans, 2020    | Use of Intravenous Immunoglobulins in Patients with Suspected Toxin-Mediated Shock Requiring Extracorporeal Membrane Oxygenation.                                                                    | Wrong population                                                              |
| Bruun, 2020         | Beta-Hemolytic Streptococci and Necrotizing Soft Tissue Infections.                                                                                                                                  | Wrong population                                                              |
| Lima-Setta, 2021    | Multisystem inflammatory syndrome in children (MIS-C) during SARS-CoV-2 pandemic in Brazil: a multicenter, prospective cohort study.                                                                 | Wrong population                                                              |
| Kohler, 2020        | Kininogen supports inflammation and bacterial spreading during Streptococcus Pyogenes Sepsis.                                                                                                        | Wrong population                                                              |
| Bruun, 2021         | Risk Factors and Predictors of Mortality in Streptococcal Necrotizing Soft-tissue Infections: A Multicenter Prospective Study.                                                                       | Wrong population                                                              |
| Bjorck, 2020        | Morbidity and mortality in critically ill patients with invasive group A streptococcus infection: an observational study.                                                                            | Wrong population                                                              |
| Contou, 2021        | Menstrual toxic shock syndrome: a French nationwide multicenter retrospective study.                                                                                                                 | Wrong population                                                              |
| Billon, 2020        | Association of characteristics of tampon use with menstrual toxic shock syndrome in France.                                                                                                          | Wrong population                                                              |
| Canetti, 2021       | Invasive Group A Streptococcus Infection in Children in Central Israel in 2012-2019                                                                                                                  | Relationship between prognostic factor and outcome not reported or quantified |

|                   |                                                                                                                                                                    |                                                                               |
|-------------------|--------------------------------------------------------------------------------------------------------------------------------------------------------------------|-------------------------------------------------------------------------------|
| Vilhonen, 2020    | Group A streptococcal bacteremias in Southwest Finland 2007-2018: epidemiology and role of infectious diseases consultation in antibiotic treatment selection.     | Relationship between prognostic factor and outcome not reported or quantified |
| Thielemans, 2020  | Clinical Description and Outcomes of Australian Children With Invasive Group A Streptococcal Disease.                                                              | Relationship between prognostic factor and outcome not reported or quantified |
| Madsen, 2020      | Treatment of Necrotizing Soft Tissue Infections: IVIG                                                                                                              | Wrong study design                                                            |
| Deniskin, 2019    | Clinical Manifestations and Bacterial Genomic Analysis of Group A Streptococcus Strains That Cause Pediatric Toxic Shock Syndrome.                                 | Relationship between prognostic factor and outcome not reported or quantified |
| Mosites, 2018     | Outbreak of Invasive Infections From Subtype emm26.3 Group A Streptococcus Among Homeless Adults-Anchorage, Alaska, 2016-2017.                                     | Relationship between prognostic factor and outcome not reported or quantified |
| Hasin, 2020       | Invasive Group A Streptococcus Infection in Children in Southern Israel Before and After the Introduction of Varicella Vaccine.                                    | Wrong population                                                              |
| Ching, 2019       | Prospective Surveillance of Pediatric Invasive Group A Streptococcus Infection.                                                                                    | Wrong population                                                              |
| Loewen, 2017      | Epidemiologic features of invasive group A Streptococcus infection in a rural hospital: 6-year retrospective report and literature review.                         | Wrong population                                                              |
| Bergsten, 2020    | Correlation Between Immunoglobulin Dose Administered and Plasma Neutralization of Streptococcal Superantigens in Patients With Necrotizing Soft Tissue Infections. | Wrong population                                                              |
| Kobayashi, 2016   | A Cluster of Group A Streptococcal Infections in a Skilled Nursing Facility-the Potential Role of Healthcare Worker Presenteeism.                                  | Wrong population                                                              |
| Adebanjo, 2020    | Evaluating Household Transmission of Invasive Group A Streptococcus Disease in the United States Using Population-based Surveillance Data, 2013-2016.              | Wrong population                                                              |
| Link-Gelles, 2020 | Characteristics of Intracranial Group A Streptococcal Infections in US Children, 1997-2014.                                                                        | Wrong population                                                              |
| Bruun, 2021       | Risk Factors and Predictors of Mortality in Streptococcal Necrotizing Soft-tissue Infections: A Multicenter Prospective Study.                                     | Wrong population                                                              |
| Shah, 2015        | Role of intravenous immune globulin in streptococcal toxic shock syndrome and Clostridium difficile infection.                                                     | Wrong study design                                                            |
| Hayata, 2021      | Nationwide study of mortality and survival in pregnancy-related streptococcal toxic shock syndrome.                                                                | Duplicate                                                                     |

1  
2  
3  
4  
5  
6  
7  
8  
9  
10  
11  
12  
13  
14  
15  
16  
17  
18  
19  
20  
21  
22  
23  
24  
25  
26  
27  
28  
29  
30  
31  
32  
33  
34  
35  
36  
37  
38  
39  
40  
41  
42  
43  
44  
45  
46  
47

### Table of additional study characteristics

| Study                   | Study Design | Country                 | Number of STSS cases | Mean age   | % Male | Cardiovascular Disease (%) | Diabetes (%) | Presence of Necrotizing Fasciitis (%) | Probable GAS STSS (%) | Confirmed GAS STSS (%) | Prognostic factor and outcome combination of interest reported                                                                                                                                                                                                                                                                                                                                                                                                    |
|-------------------------|--------------|-------------------------|----------------------|------------|--------|----------------------------|--------------|---------------------------------------|-----------------------|------------------------|-------------------------------------------------------------------------------------------------------------------------------------------------------------------------------------------------------------------------------------------------------------------------------------------------------------------------------------------------------------------------------------------------------------------------------------------------------------------|
| Abuhammour 2004         | Cohort       | United States           | 2                    | 9          | 100    | NR                         | NR           | NR                                    | NR                    | NR                     | age - clinical cure/improvement^<br>age - ICU admission^<br>age - mortality^<br>any antibiotic - clinical cure/improvement^<br>any antibiotic - ICU admission<br>any antibiotic - mortality                                                                                                                                                                                                                                                                       |
| Adalat 2014             | Cohort       | United Kingdom, Ireland | 29                   | 4 (median) | 62     | NR                         | NR           | 28                                    | 38                    | 62                     | IVIG - mortality                                                                                                                                                                                                                                                                                                                                                                                                                                                  |
| Al-Ajmi 2012            | Case-series  | Qatar                   | 2                    | 35         | 0      | NR                         | NR           | NR                                    | 0                     | 100                    | age - clinical cure/improvement^<br>age - ICU admission^<br>age - mortality^                                                                                                                                                                                                                                                                                                                                                                                      |
| Barnham 2002            | Case-series  | England                 | 12                   | 57         | 64     | NR                         | NR           | 58                                    | 17                    | 83                     | age - ICU admission^<br>age - mortality^<br>any antibiotic - ICU admission<br>any antibiotic - mortality<br>clindamycin - ICU admission^<br>clindamycin - mortality<br>emm type - ICU admission^<br>emm type - mortality^<br>immunocompromised - ICU admission^<br>immunocompromised - mortality<br>IVIG - ICU admission<br>IVIG - mortality<br>IVIG - time to mortality^<br>NF - ICU admission<br>NF - mortality<br>NSAIDs - ICU admission<br>NSAIDs - mortality |
| Bernaldo de Quiros 1997 | Cohort       | Spain                   | 9                    | NR         | NR     | NR                         | NR           | NR                                    | NR                    | NR                     | immunocompromised - mortality^                                                                                                                                                                                                                                                                                                                                                                                                                                    |

1  
2  
3  
4  
5  
6  
7  
8  
9  
10  
11  
12  
13  
14  
15  
16  
17  
18  
19  
20  
21  
22  
23  
24  
25  
26  
27  
28  
29  
30  
31  
32  
33  
34  
35  
36  
37  
38  
39  
40  
41  
42  
43  
44  
45  
46  
47

| Study                   | Study Design | Country       | Number of STSS cases | Mean age | % Male | Cardiovascular Disease (%) | Diabetes (%) | Presence of Necrotizing Fasciitis (%) | Probable GAS STSS (%) | Confirmed GAS STSS (%) | Prognostic factor and outcome combination of interest reported                                                                                                                                                                                                                                                                                                                                                                                                                                                                                                                                                                                                                                                           |
|-------------------------|--------------|---------------|----------------------|----------|--------|----------------------------|--------------|---------------------------------------|-----------------------|------------------------|--------------------------------------------------------------------------------------------------------------------------------------------------------------------------------------------------------------------------------------------------------------------------------------------------------------------------------------------------------------------------------------------------------------------------------------------------------------------------------------------------------------------------------------------------------------------------------------------------------------------------------------------------------------------------------------------------------------------------|
| Brogan 1995             | Case-series  | United States | 5                    | 6        | 60     | NR                         | NR           | 100                                   | 60                    | 40                     | age - clinical cure/improvement^<br>age - hospital LOS^<br>age - ICU admission^<br>age - ICU LOS^<br>age - mortality^<br>NSAIDs - clinical cure/improvement^<br>NSAIDs - hospital LOS^<br>NSAIDs - ICU admission<br>NSAIDs - ICU LOS^<br>NSAIDs - mortality<br>sex - clinical cure/improvement<br>sex - hospital LOS^<br>sex - ICU admission<br>sex - ICU LOS^<br>sex - mortality                                                                                                                                                                                                                                                                                                                                        |
| Butragueno Laiseca 2017 | Case-series  | Spain         | 13                   | 2        | 50     | NR                         | NR           | 15                                    | 15                    | 85                     | acute renal failure - clinical cure/improvement^<br>acute renal failure - mechanical ventilation<br>acute renal failure - mortality<br>age - clinical cure/improvement^<br>age - ICU LOS^<br>age - mechanical ventilation^<br>age - mortality^<br>clindamycin - clinical cure/improvement^<br>clindamycin - ICU LOS^<br>clindamycin - mechanical ventilation^<br>clindamycin - mortality<br>hemodialysis - clinical cure/improvement<br>hemodialysis - mechanical ventilation<br>hemodialysis - mortality<br>IVIg - clinical cure/improvement<br>IVIg - ICU LOS<br>IVIg - mechanical ventilation<br>IVIg - mortality<br>NF - clinical cure/improvement<br>NF - ICU LOS^<br>NF - mechanical ventilation<br>NF - mortality |
| Carapetis 1995          | Case-series  | Australia     | 5                    | NR       | NR     | NR                         | NR           | NR                                    | NR                    | NR                     | age - mortality^                                                                                                                                                                                                                                                                                                                                                                                                                                                                                                                                                                                                                                                                                                         |



1  
2  
3  
4  
5  
6  
7  
8  
9  
10  
11  
12  
13  
14  
15  
16  
17  
18  
19  
20  
21  
22  
23  
24  
25  
26  
27  
28  
29  
30  
31  
32  
33  
34  
35  
36  
37  
38  
39  
40  
41  
42  
43  
44  
45  
46  
47

| Study          | Study Design     | Country                              | Number of STSS cases | Mean age | % Male | Cardiovascular Disease (%) | Diabetes (%) | Presence of Necrotizing Fasciitis (%) | Probable GAS STSS (%) | Confirmed GAS STSS (%) | Prognostic factor and outcome combination of interest reported                                                                                                                                                                                                 |
|----------------|------------------|--------------------------------------|----------------------|----------|--------|----------------------------|--------------|---------------------------------------|-----------------------|------------------------|----------------------------------------------------------------------------------------------------------------------------------------------------------------------------------------------------------------------------------------------------------------|
| Carapetis 2014 | Cohort           | Australia                            | 37                   | 60       | 50     | NR                         | NR           | 100                                   | 0                     | 100                    | age - mortality^<br>IVIG - mortality<br>sex - mortality                                                                                                                                                                                                        |
| Cimolai 1992   | Case-series      | Canada                               | 4                    | 8        | 50     | NR                         | NR           | NR                                    | 0                     | 100                    | age - clinical cure/improvement^<br>age - mortality^<br>sex - clinical cure/improvement<br>sex - mortality                                                                                                                                                     |
| Cook 2020      | Cohort           | United States                        | 27                   | 9        | 44     | NR                         | NR           | 19                                    | 56                    | 44                     | other - other^                                                                                                                                                                                                                                                 |
| Cowan 1994     | Case-series      | United States                        | 3                    | 2        | 67     | NR                         | NR           | NR                                    | 100                   | 0                      | age - clinical cure/improvement^<br>age - ICU admission^<br>age - ICU LOS^<br>age - mechanical ventilation^<br>age - mortality^<br>sex - clinical cure/improvement<br>sex - ICU admission<br>sex - ICU LOS^<br>sex - mechanical ventilation<br>sex - mortality |
| Crum 2004      | Case-series      | United States                        | 2                    | 24       | 100    | NR                         | NR           | 50                                    | 0                     | 100                    | age - clinical cure/improvement^<br>age - ICU admission^<br>age - mechanical ventilation^<br>age - mortality^<br>hemodialysis - clinical cure/improvement<br>hemodialysis - ICU admission<br>hemodialysis - mechanical ventilation<br>hemodialysis - mortality |
| Dahl 2002      | Case-series      | United States                        | 5                    | 53       | NR     | NR                         | NR           | 100                                   | 0                     | 100                    | age - mortality^<br>immunocompromised - mortality                                                                                                                                                                                                              |
| Darenberg 2003 | Randomized trial | Sweden, Norway, Finland, Netherlands | 18                   | 52       | 48     | NR                         | NR           | NR                                    | 11                    | 89                     | IVIG - change in SOFA score^<br>IVIG - mortality<br>IVIG - time to clinical cure/improvement^<br>IVIG - time to mortality^                                                                                                                                     |

| Study          | Study Design | Country       | Number of STSS cases | Mean age       | % Male | Cardiovascular Disease (%) | Diabetes (%) | Presence of Necrotizing Fasciitis (%) | Probable GAS STSS (%) | Confirmed GAS STSS (%) | Prognostic factor and outcome combination of interest reported                                                                                                                                                                                                                                                                                                                     |
|----------------|--------------|---------------|----------------------|----------------|--------|----------------------------|--------------|---------------------------------------|-----------------------|------------------------|------------------------------------------------------------------------------------------------------------------------------------------------------------------------------------------------------------------------------------------------------------------------------------------------------------------------------------------------------------------------------------|
| Donaldson 1993 | Case-series  | England       | 5                    | 67             | 20     | NR                         | NR           | 100                                   | NR                    | NR                     | age - mortality^<br>any antibiotic - mortality<br>sex - mortality                                                                                                                                                                                                                                                                                                                  |
| Erdem 2004     | Case-series  | United States | 3                    | 52             | 67     | NR                         | NR           | 100                                   | NR                    | 33                     | age - mortality^<br>sex - mortality                                                                                                                                                                                                                                                                                                                                                |
| Eriksson 1999  | Cohort       | Sweden        | 6                    | 46             | 83     | NR                         | NR           | NR                                    | 0                     | 100                    | age - mortality^<br>emm type - mortality^<br>sex - mortality                                                                                                                                                                                                                                                                                                                       |
| Forni 1995     | Case-series  | United States | 5                    | 54             | 83     | NR                         | 17           | 50                                    | 0                     | 100                    | acute renal failure - ICU admission^<br>acute renal failure - mortality<br>age - hospital LOS^<br>age - ICU admission^<br>age - mortality^<br>emm type - ICU admission^<br>emm type - mortality^<br>NF - ICU admission<br>NF - mortality                                                                                                                                           |
| Fronhoffs 2000 | Case-series  | Germany       | 7                    | 49             | 71     | 14                         | 14           | 86                                    | 86                    | 14                     | acute renal failure - mechanical ventilation<br>acute renal failure - mortality<br>age - mechanical ventilation^<br>age - mortality^<br>immunocompromised - mechanical ventilation^<br>immunocompromised - mortality<br>NF - mechanical ventilation<br>NF - mortality<br>NSAIDs - mechanical ventilation^<br>NSAIDs - mortality<br>sex - mechanical ventilation<br>sex - mortality |
| Hasegawa 2004  | Case-control | Japan         | 66*                  | Range: 0 to 70 | 59     | NR                         | 18           | NR                                    | 100                   | 0                      | acute renal failure - mortality                                                                                                                                                                                                                                                                                                                                                    |
| Hayata 2021    | Cohort       | Japan         | 28                   | NR             | 0      | NR                         | NR           | NR                                    | 0                     | 100                    | age - mortality^<br>NSAIDs - mortality                                                                                                                                                                                                                                                                                                                                             |

1  
2  
3  
4  
5  
6  
7  
8  
9  
10  
11  
12  
13  
14  
15  
16  
17  
18  
19  
20  
21  
22  
23  
24  
25  
26  
27  
28  
29  
30  
31  
32  
33  
34  
35  
36  
37  
38  
39  
40  
41  
42  
43  
44  
45  
46  
47

| Study            | Study Design | Country                                                                                                   | Number of STSS cases | Mean age | % Male | Cardiovascular Disease (%) | Diabetes (%) | Presence of Necrotizing Fasciitis (%) | Probable GAS STSS (%) | Confirmed GAS STSS (%) | Prognostic factor and outcome combination of interest reported                                                                     |
|------------------|--------------|-----------------------------------------------------------------------------------------------------------|----------------------|----------|--------|----------------------------|--------------|---------------------------------------|-----------------------|------------------------|------------------------------------------------------------------------------------------------------------------------------------|
| Huang 2001       | Case-series  | Taiwan                                                                                                    | 3                    | 6        | 100    | NR                         | NR           | NR                                    | 33                    | 67                     | age - mortality^                                                                                                                   |
| Kansal 2000      | Cohort       | Canada                                                                                                    | 28                   | NR       | NR     | NR                         | NR           | NR                                    | NR                    | NR                     | NF - other^                                                                                                                        |
| Kaul 1999        | Case-control | Canada                                                                                                    | 53                   | 57       | 55     | NR                         | NR           | NR                                    | NR                    | NR                     | dindamycin - mortality<br>IVIG - duration of mechanical ventilation^<br>IVIG - hospital LOS<br>IVIG - mortality<br>NF - mortality  |
| Linder 2017      | Cohort       | United States                                                                                             | 10                   | NR       | NR     | NR                         | NR           | NR                                    | 0                     | 100                    | immunocompromised - mortality                                                                                                      |
| Linnér 2014      | Cohort       | Sweden                                                                                                    | 67                   | 63       | 42     | 48                         | 16           | 28                                    | NR                    | NR                     | age - mortality^<br>dindamycin - mortality<br>IVIG - hospital LOS<br>IVIG - mortality                                              |
| Luca-Harari 2009 | Cohort       | Cyprus, Czech Republic, Denmark, Finland, France, Germany, Greece, Italy, Romania, Sweden, United Kingdom | 476                  | NR       | NR     | NR                         | NR           | NR                                    | NR                    | NR                     | emm type - mortality^                                                                                                              |
| Nelson 2016      | Cohort       | United States                                                                                             | 381                  | NR       | NR     | NR                         | NR           | 19                                    | NR                    | NR                     | age - mortality<br>NF - mortality                                                                                                  |
| O'Loughlin 2007  | Cohort       | United States                                                                                             | 309                  | NR       | NR     | NR                         | NR           | 20                                    | NR                    | NR                     | age - mortality<br>NF - mortality                                                                                                  |
| Page 2011        | Cohort       | Canada                                                                                                    | 16                   | NR       | NR     | NR                         | NR           | NR                                    | NR                    | NR                     | other - other^                                                                                                                     |
| Safar 2011       | Cohort       | New Zealand                                                                                               | 30                   | NR       | NR     | NR                         | NR           | 17                                    | 0                     | 100                    | age - mortality<br>NF - mortality                                                                                                  |
| Schwartz 1992    | Case-series  | United States                                                                                             | 8                    | 40       | 40     | NR                         | NR           | NR                                    | 0                     | 100                    | age - mortality^<br>emm type - mortality^<br>sex - mortality                                                                       |
| Shah 2009        | Cohort       | United States                                                                                             | 192                  | 8        | 49     | NR                         | NR           | NR                                    | NR                    | NR                     | IVIG - cost^<br>IVIG - hospital LOS<br>IVIG - ICU admission<br>IVIG - ICU LOS<br>IVIG - mechanical ventilation<br>IVIG - mortality |

| Study            | Study Design | Country       | Number of STSS cases | Mean age    | % Male | Cardiovascular Disease (%) | Diabetes (%) | Presence of Necrotizing Fasciitis (%) | Probable GAS STSS (%) | Confirmed GAS STSS (%) | Prognostic factor and outcome combination of interest reported                                                                                                                                                                                                                                                                                                                                                                                                                                                                                                                                        |
|------------------|--------------|---------------|----------------------|-------------|--------|----------------------------|--------------|---------------------------------------|-----------------------|------------------------|-------------------------------------------------------------------------------------------------------------------------------------------------------------------------------------------------------------------------------------------------------------------------------------------------------------------------------------------------------------------------------------------------------------------------------------------------------------------------------------------------------------------------------------------------------------------------------------------------------|
| Sriskandan 2000  | Cohort       | England       | 7                    | NR          | NR     | NR                         | NR           | NR                                    | NR                    | NR                     | other - other^                                                                                                                                                                                                                                                                                                                                                                                                                                                                                                                                                                                        |
| Stegmayr 1992    | Case-series  | Sweden        | 11                   | 42          | 64     | NR                         | NR           | NR                                    | 27                    | 73                     | age - clinical cure/improvement^<br>age - ICU admission^<br>age - mechanical ventilation^<br>age - mortality^<br>hemodialysis - clinical cure/improvement<br>hemodialysis - ICU admission<br>hemodialysis - mechanical ventilation<br>hemodialysis - mortality<br>IVIG - clinical cure/improvement<br>IVIG - ICU admission<br>IVIG - mechanical ventilation<br>IVIG - mortality<br>NF - clinical cure/improvement<br>NF - ICU admission<br>NF - mechanical ventilation<br>NF - mortality<br>sex - clinical cure/improvement<br>sex - ICU admission<br>sex - mechanical ventilation<br>sex - mortality |
| Stevens 1989     | Case-series  | United States | 19                   | 41          | 53     | 80                         | 5            | 21                                    | 0                     | 100                    | age - mortality^<br>emm type - mortality^<br>hemodialysis - mortality<br>NF - mortality<br>sex - mortality                                                                                                                                                                                                                                                                                                                                                                                                                                                                                            |
| Stockmann 2012   | Cohort       | United States | 53                   | 30 (median) | NR     | 58                         | 19           | 32                                    | NR                    | NR                     | age - ICU admission^<br>age - mortality                                                                                                                                                                                                                                                                                                                                                                                                                                                                                                                                                               |
| Tagini 2017      | Case-series  | Switzerland   | 5                    | 18          | 60     | NR                         | NR           | NR                                    | 20                    | 80                     | age - mortality^<br>emm type - mortality^<br>sex - mortality                                                                                                                                                                                                                                                                                                                                                                                                                                                                                                                                          |
| Zachariadou 2013 | Cohort       | Greece        | 19                   | NR          | NR     | NR                         | NR           | NR                                    | 0                     | 100                    | age - mortality<br>emm type - mortality^                                                                                                                                                                                                                                                                                                                                                                                                                                                                                                                                                              |

1  
2  
3  
4  
5  
6  
7  
8  
9  
10  
11  
12  
13  
14  
15  
16  
17  
18  
19  
20  
21  
22  
23  
24  
25  
26  
27  
28  
29  
30  
31  
32  
33  
34  
35  
36  
37  
38  
39  
40  
41  
42  
43  
44  
45  
46  
47

1  
2  
3  
4  
5  
6  
7  
8  
9  
10  
11  
12  
13  
14  
15  
16  
17  
18  
19  
20  
21  
22  
23  
24  
25  
26  
27  
28  
29  
30  
31  
32  
33  
34  
35  
36  
37  
38  
39  
40  
41  
42  
43  
44  
45  
46  
47

\*More than 80% of STSS cases due to group A *Streptococcus*

^Excluded from meta-analysis

NF=necrotizing fasciitis

NSAIDs=non-steroidal anti-inflammatory drugs

ICU=intensive care unit

IVIG=intravenous immunoglobulin

GAS=group A *Streptococcus*

STSS=streptococcal toxic shock syndrome

NR=not reported

For peer review only

## Forest plots

**n<sub>e</sub>**: number of patients with the outcome exposed to or experiencing the prognostic factor (experimental group)

**N<sub>e</sub>**: total number of patients exposed to or experiencing the prognostic factor (experimental group)

**n<sub>c</sub>**: number of patients with the outcome not exposed to or experiencing the prognostic factor (control group)

**N<sub>c</sub>**: total number of patients not exposed to or experiencing the prognostic factor (control group)

Percentages in forest plots correspond to the percent weight contribution of each study in the meta-analysis.

### Mortality

#### 1. Sex: male vs female (reference)

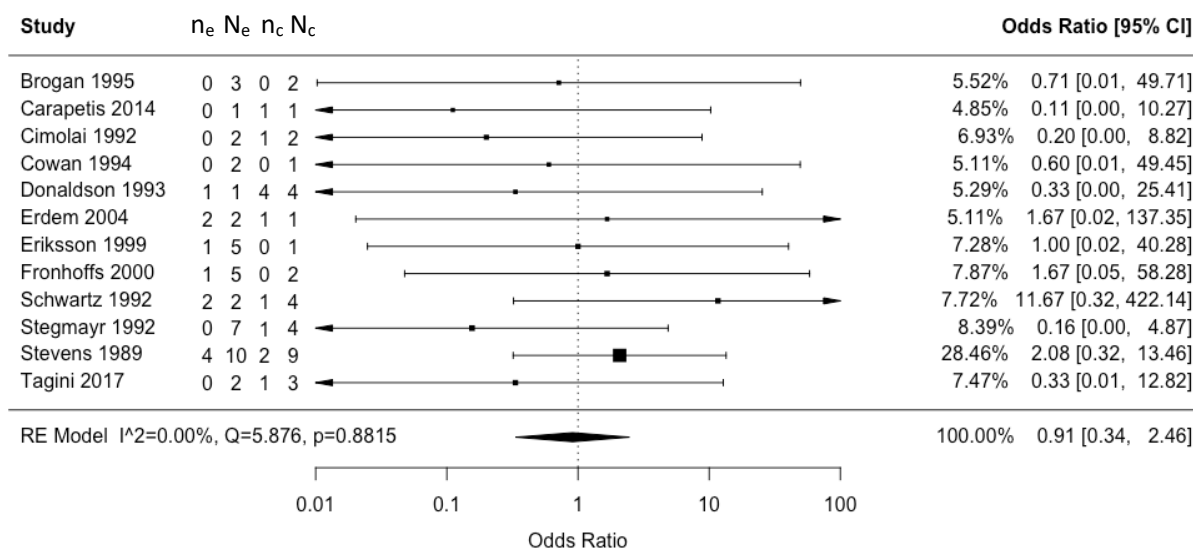

#### 2.A) IVIG in all STSS patients: yes vs no (reference)

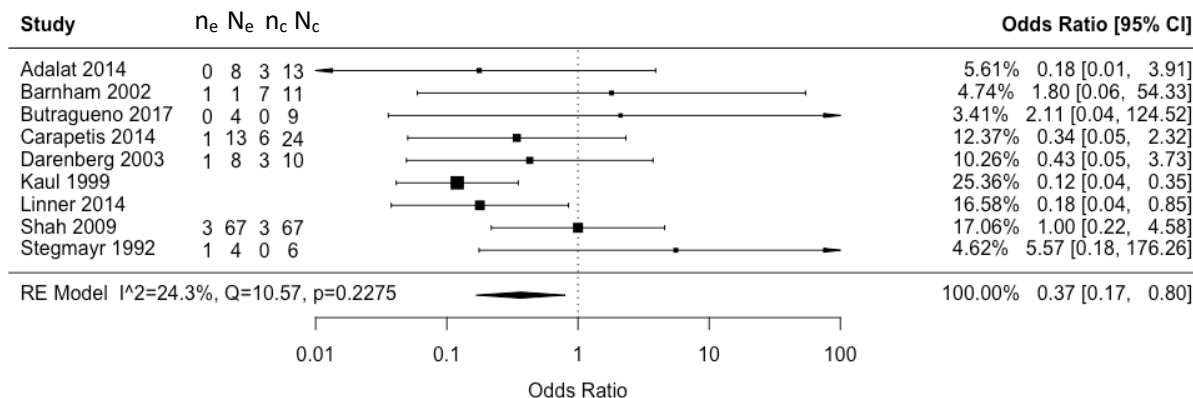

2.B) IVIG in the subset of STSS patients treated with clindamycin: yes vs no (reference)

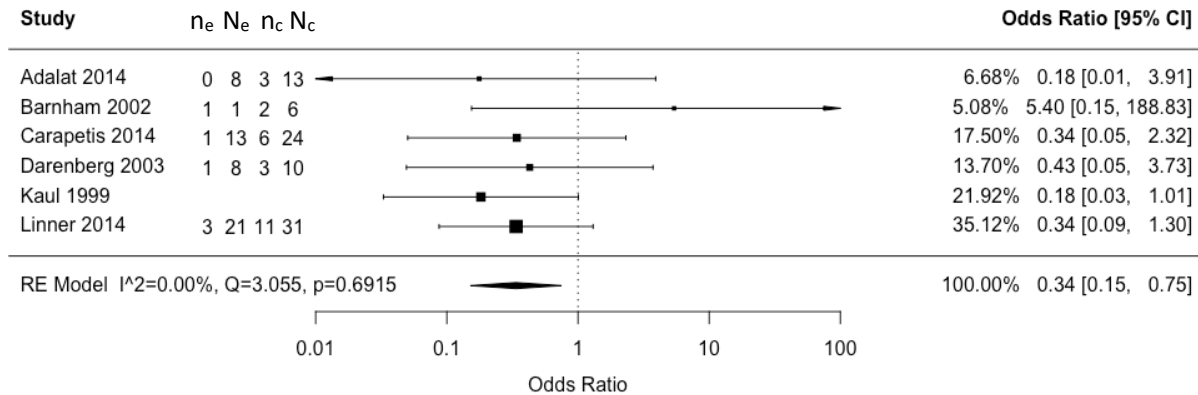

3. Any antibiotic: yes vs no (reference)

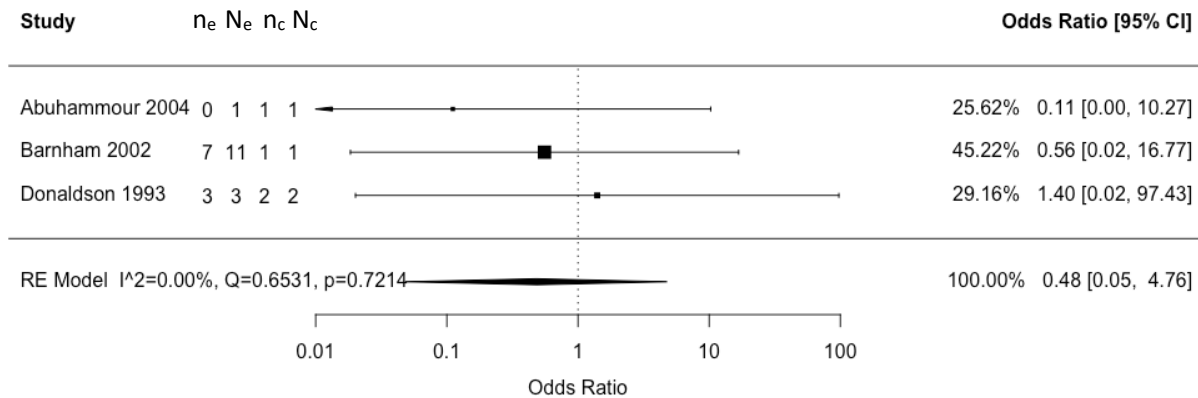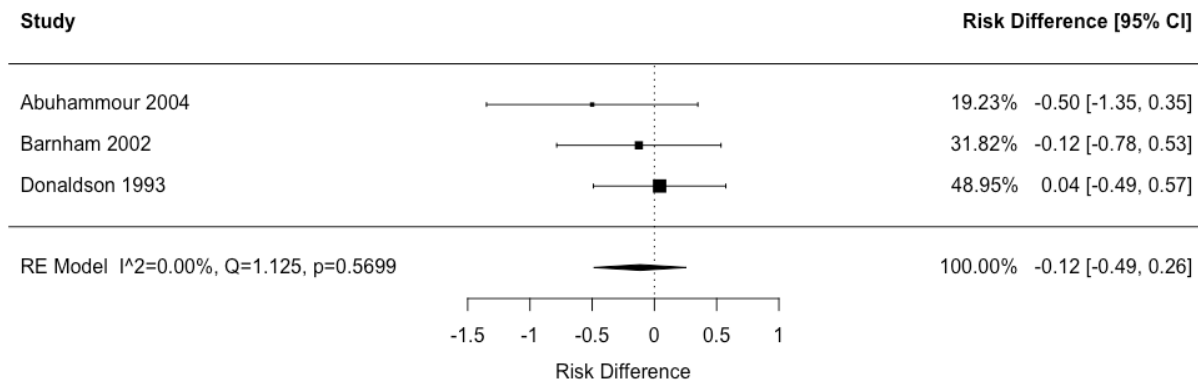

4. Necrotizing fasciitis: yes vs no (reference)

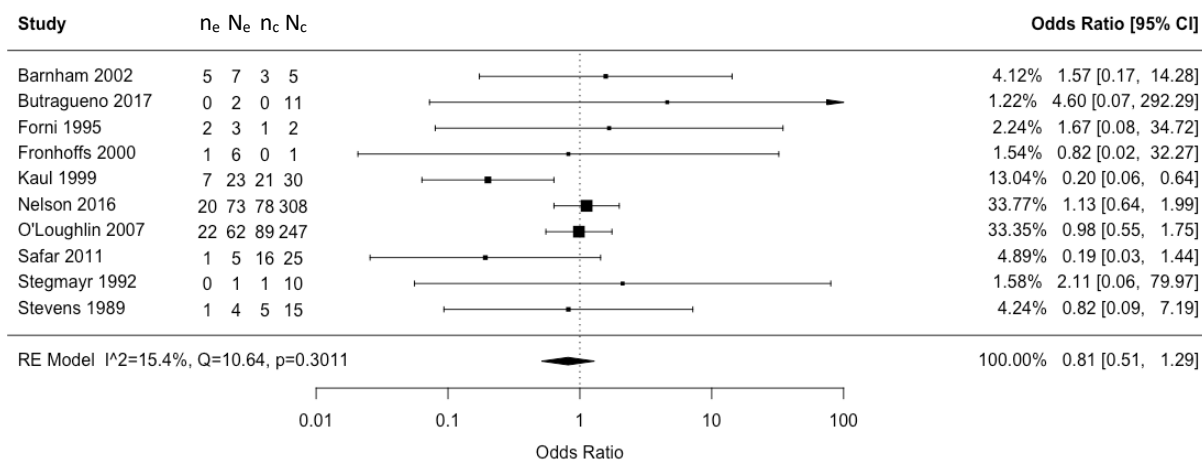

5. NSAIDs: yes vs no (reference)

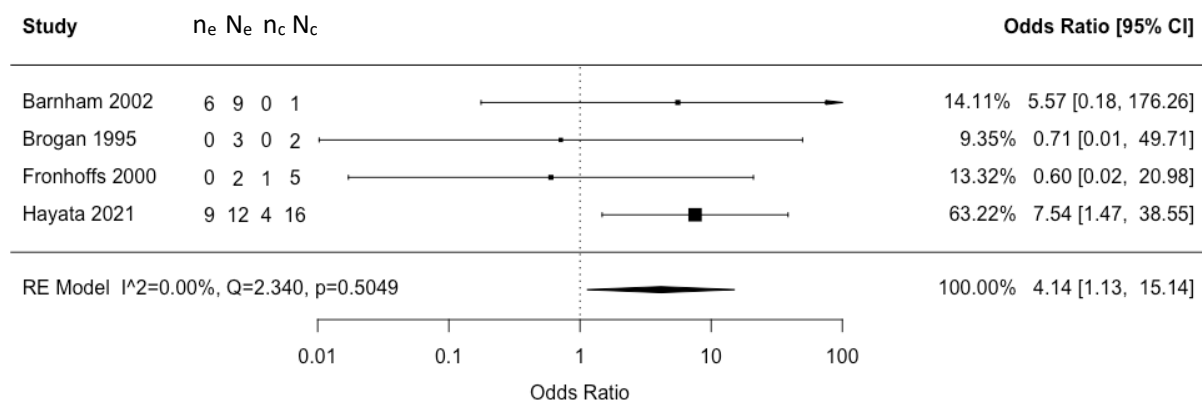

6. Immunocompromised: yes vs no (reference)

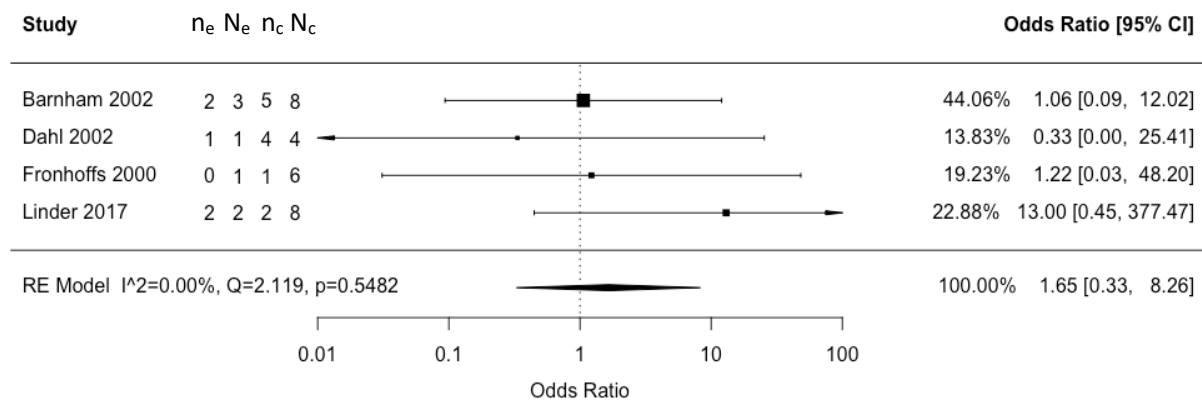



## 7. Age: &lt;18 years vs 18-64 years (reference)

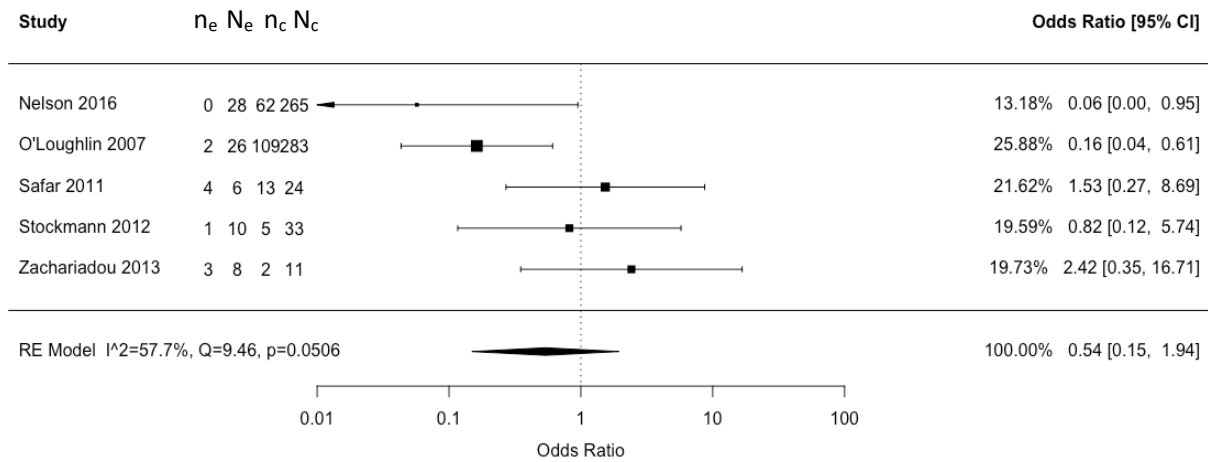

## 8. Age: ≥65 years vs &lt;18 years (reference)

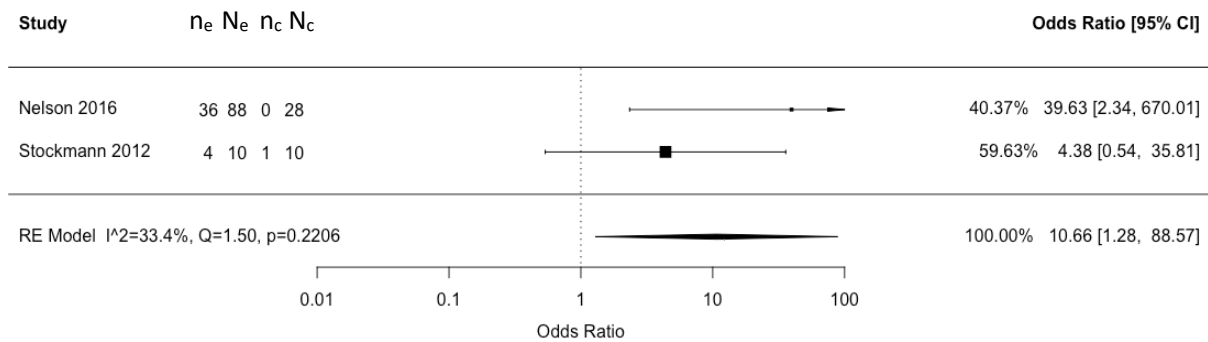

## 9: Age: ≥65 years vs 18-64 years (reference)

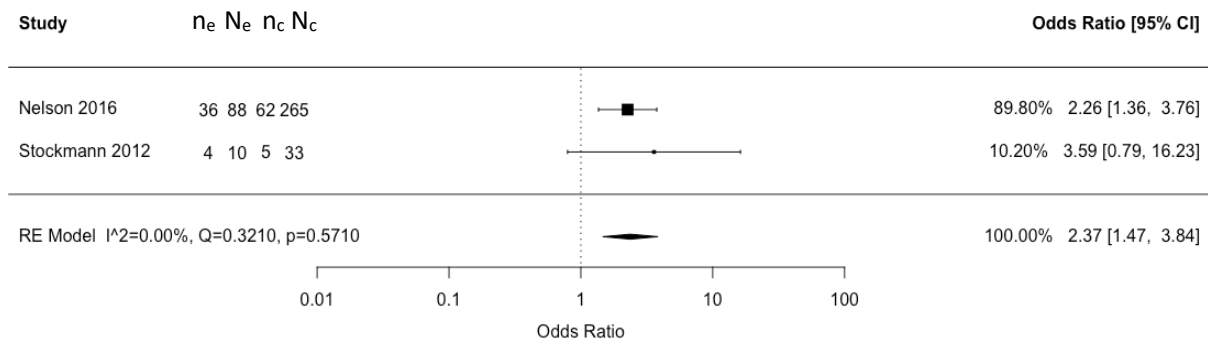

10. Clindamycin antibiotic vs no clindamycin antibiotic (reference)

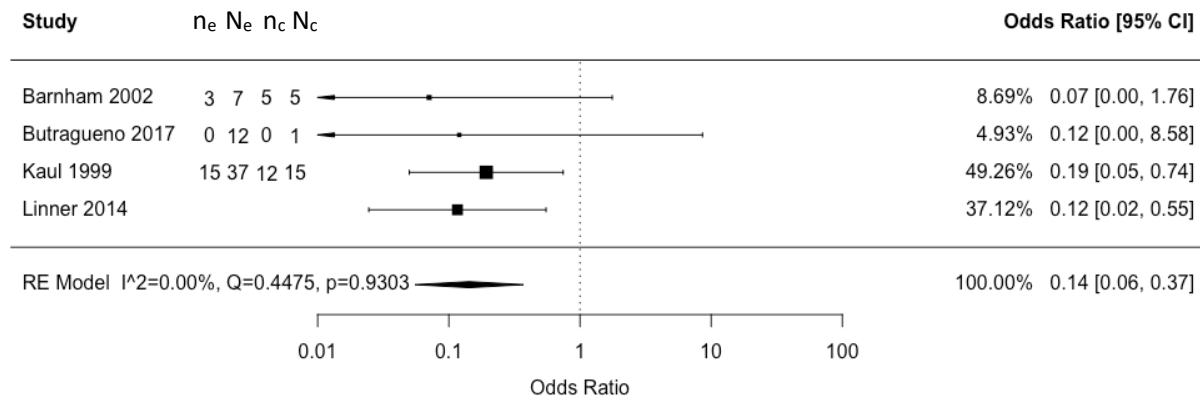

11. Acute renal failure: yes vs no (reference)

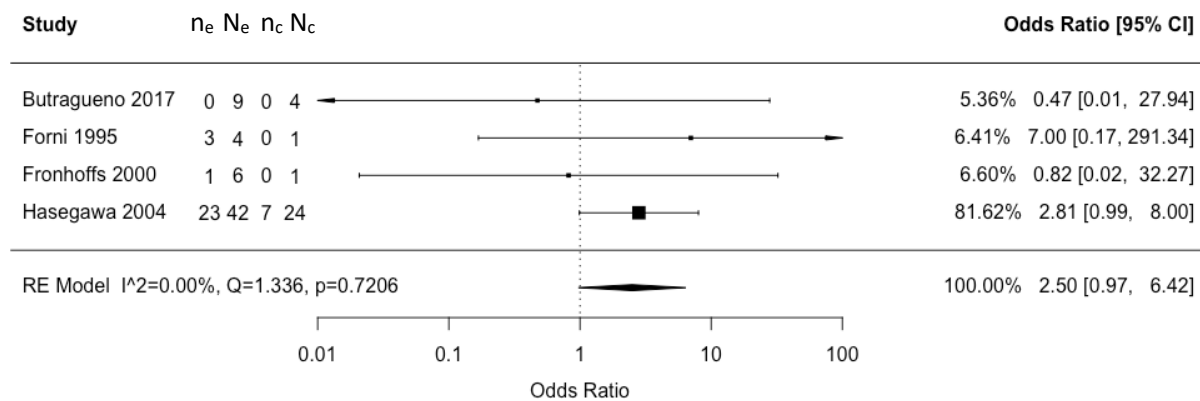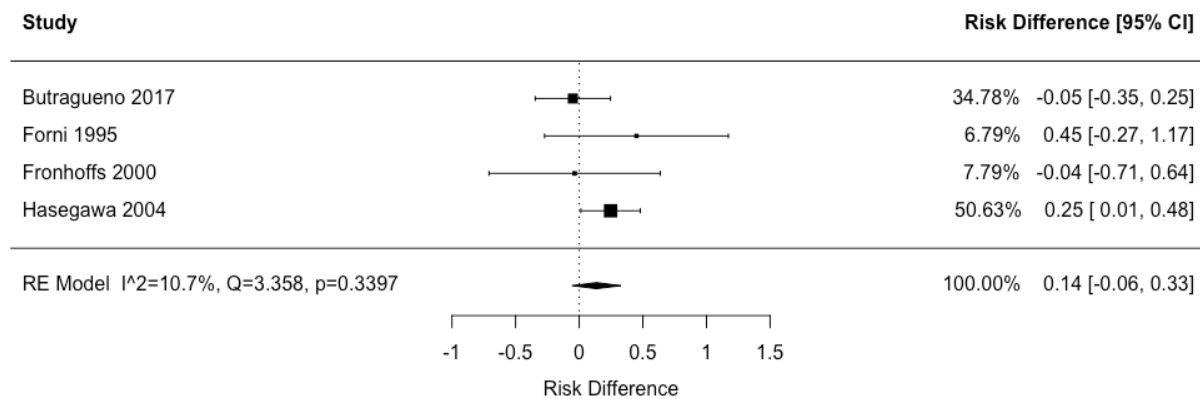

12. Hemodialysis: yes vs no (reference)

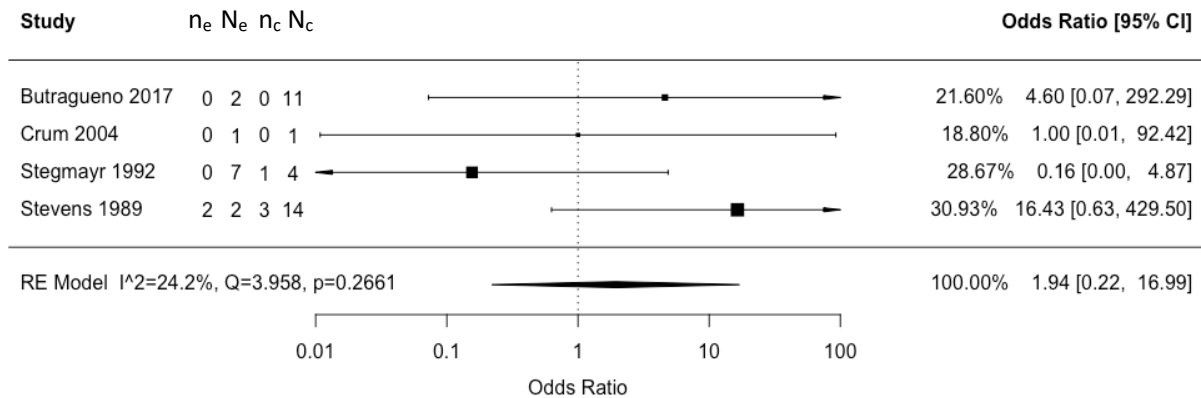

peer review only

ICU admission

This note pertains to meta-analyses of the outcome ICU admission that include the study Stegmayr 1992. For this study, 10 of 11 STSS patients were admitted to the ICU. Despite no explicit mention of which one patient was not admitted to the ICU, our interpretation of the clinical profiles and patient-level data allowed us to deduce that patient 1 likely did not require ICU admission. We reached out to the corresponding author to confirm if our interpretation was correct, but did not receive a response.

1. Sex: male vs female (reference)

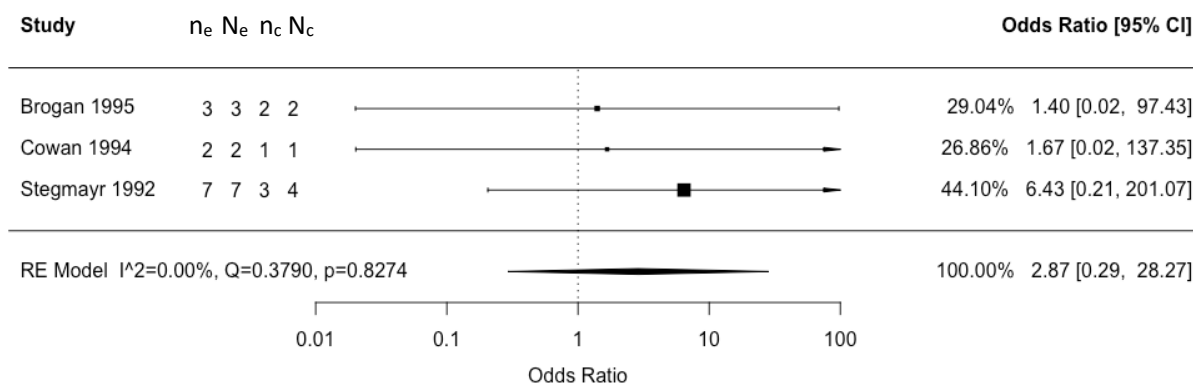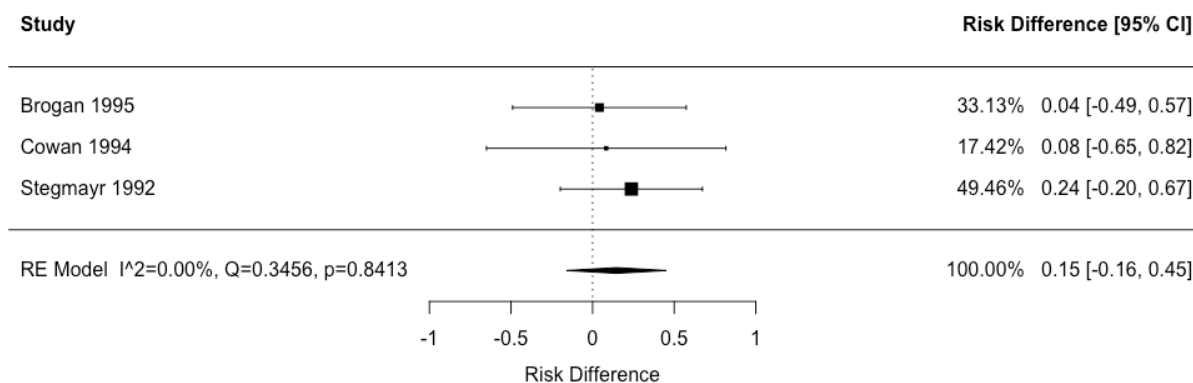

2. Any antibiotic: yes vs no (reference)

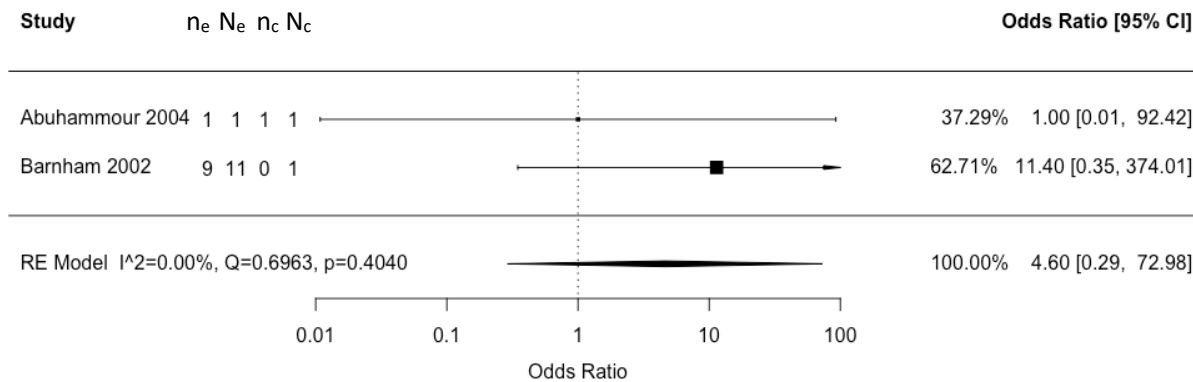

3. Necrotizing fasciitis: yes vs no (reference)

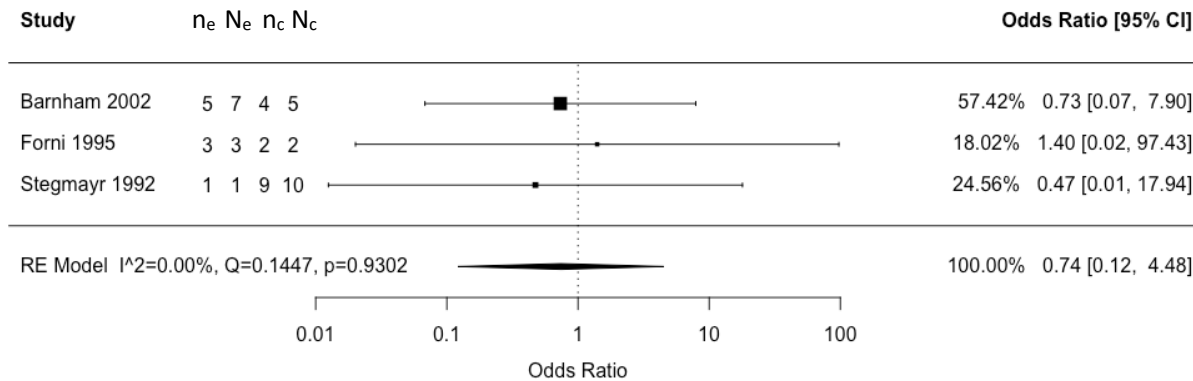

4. NSAIDs: yes vs no (reference)

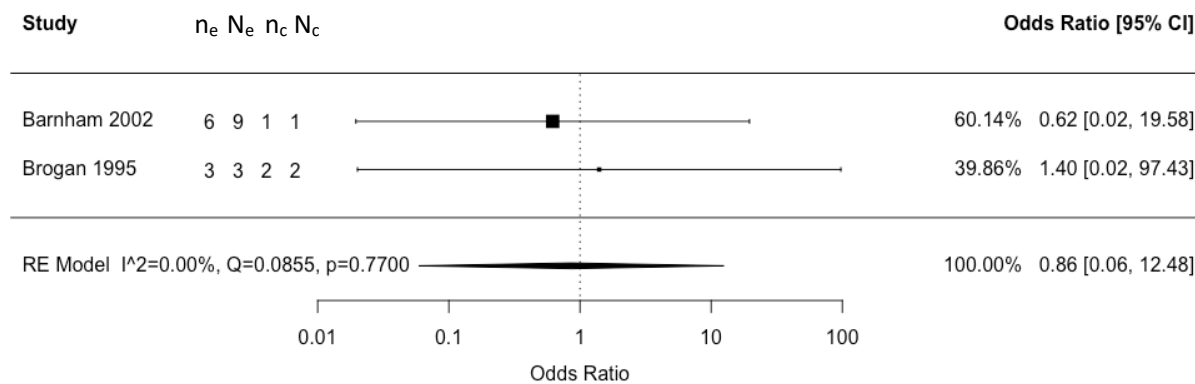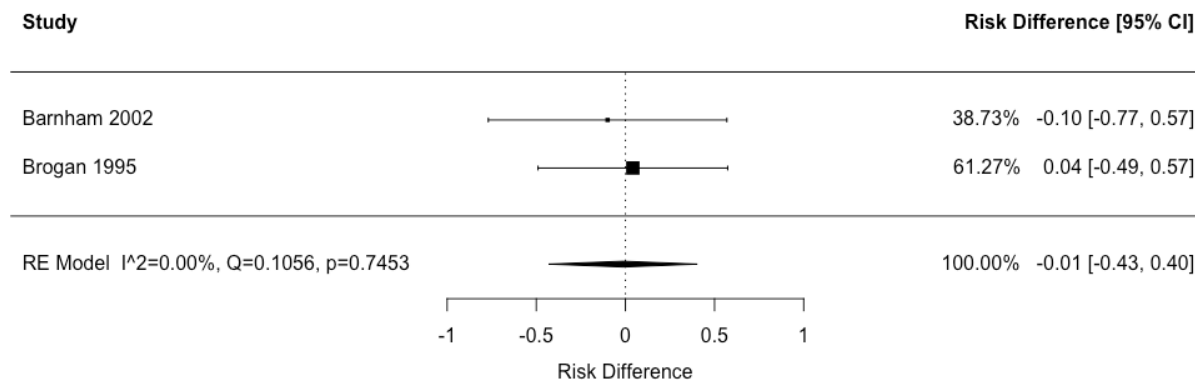

5. IVIG in all STSS patients: yes vs no (reference)

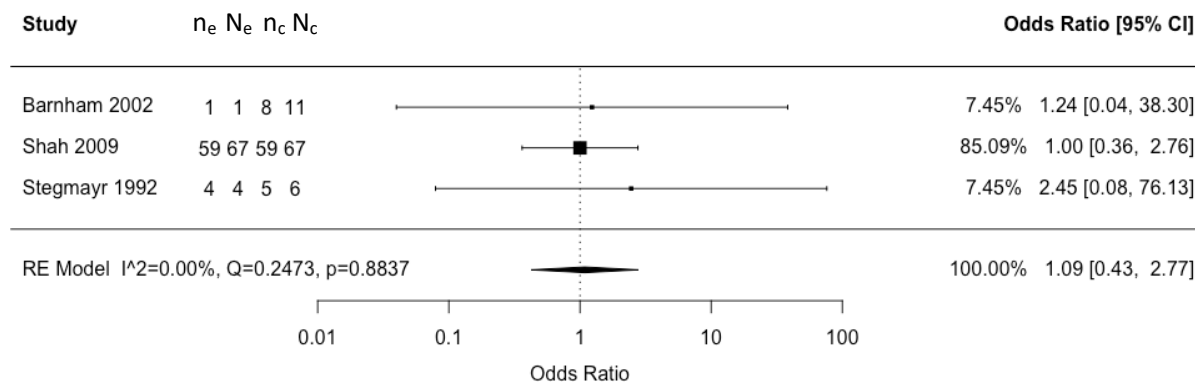

6. Hemodialysis: yes vs no (reference)

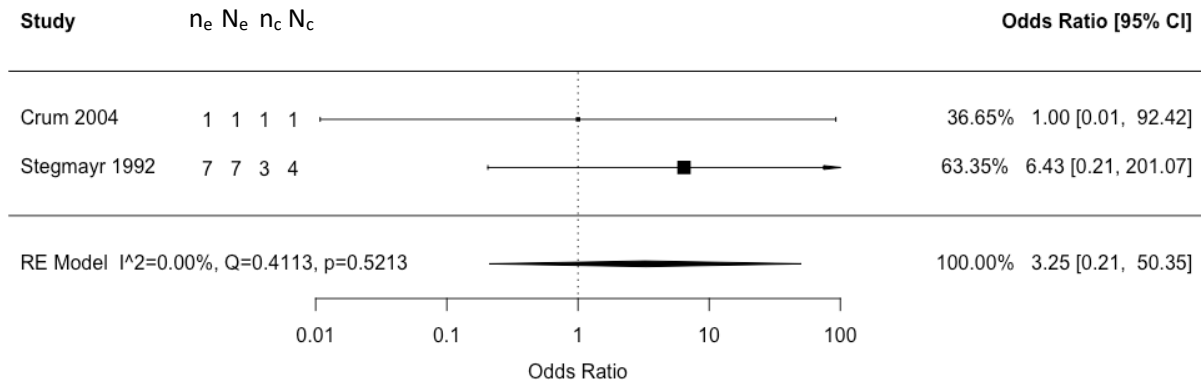

peer review only

Clinical cure or improvement

1. Sex: male vs female (reference)

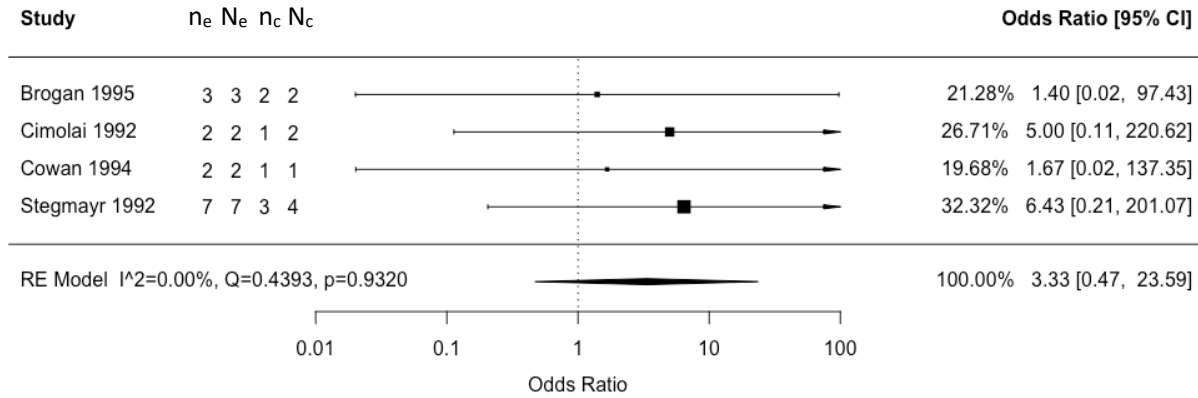

2. IVIG in all STSS patients: yes vs no (reference)

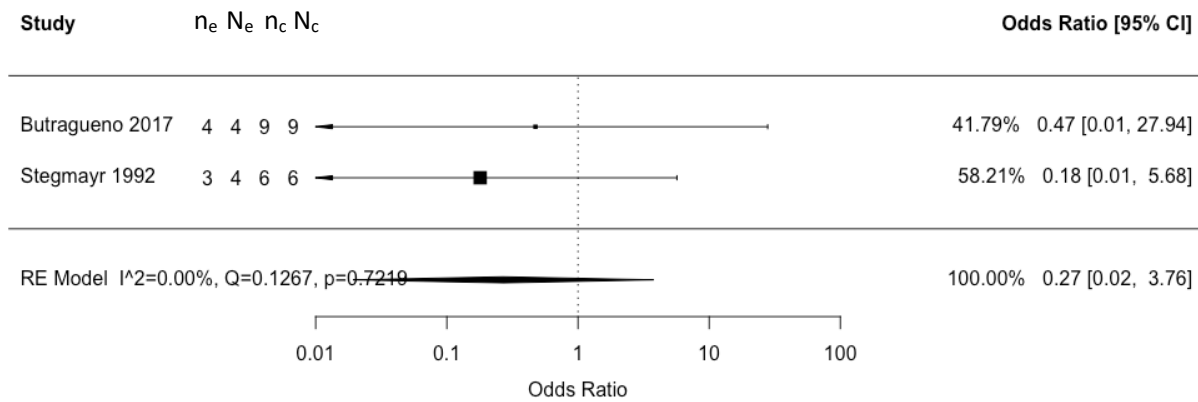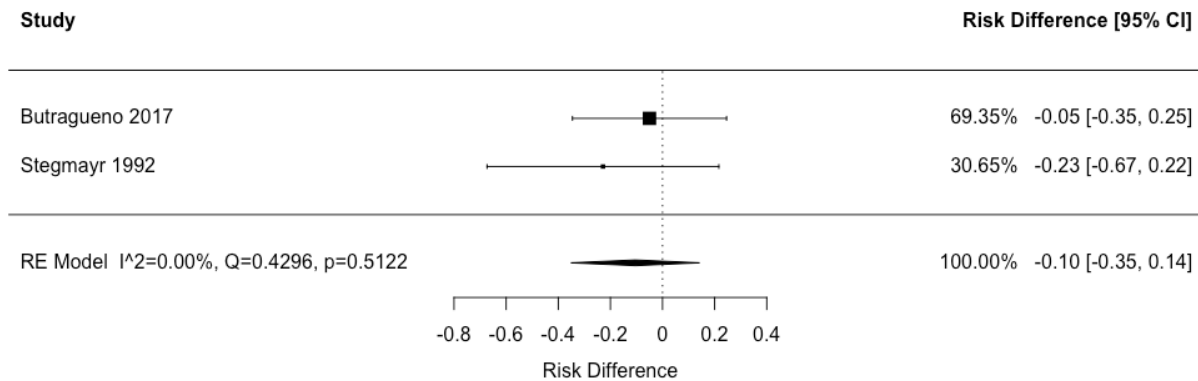



## 3. Necrotizing fasciitis: yes vs no (reference)

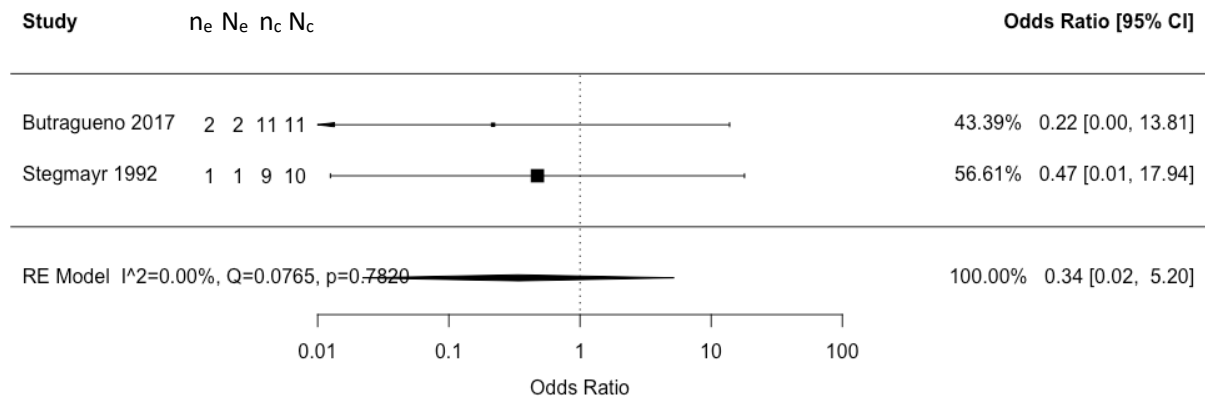

## 4. Hemodialysis: yes vs no (reference)

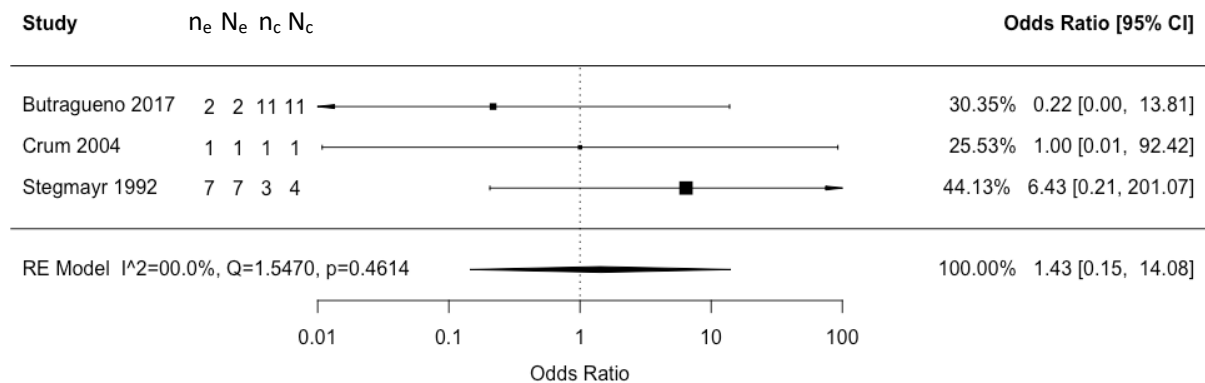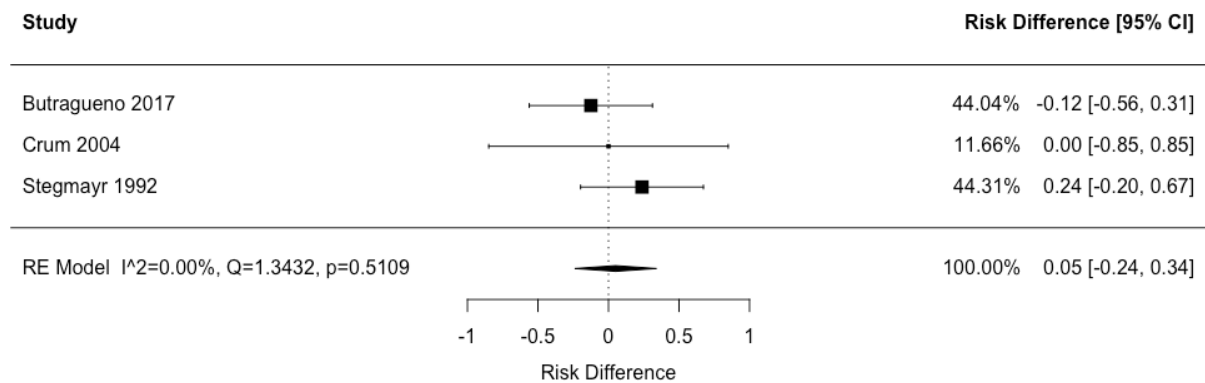

Mechanical ventilation

1. Sex: male vs female (reference)

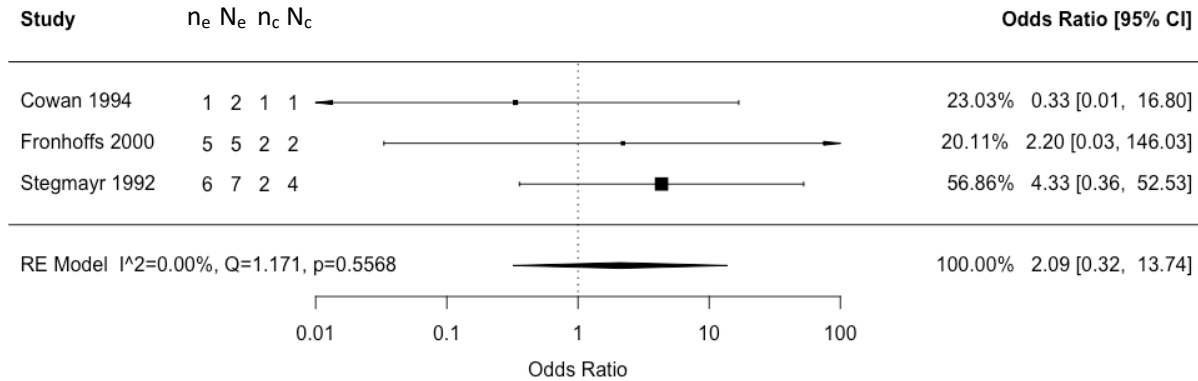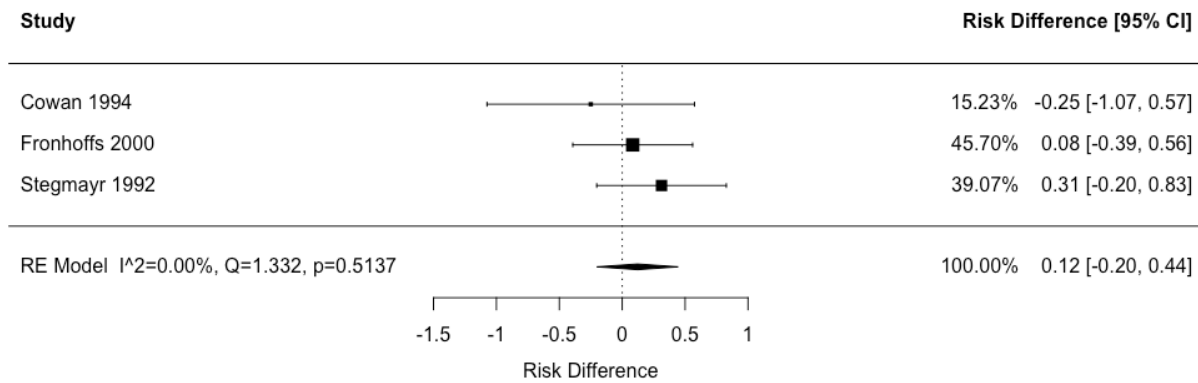

2. Acute renal failure: yes vs no (reference)

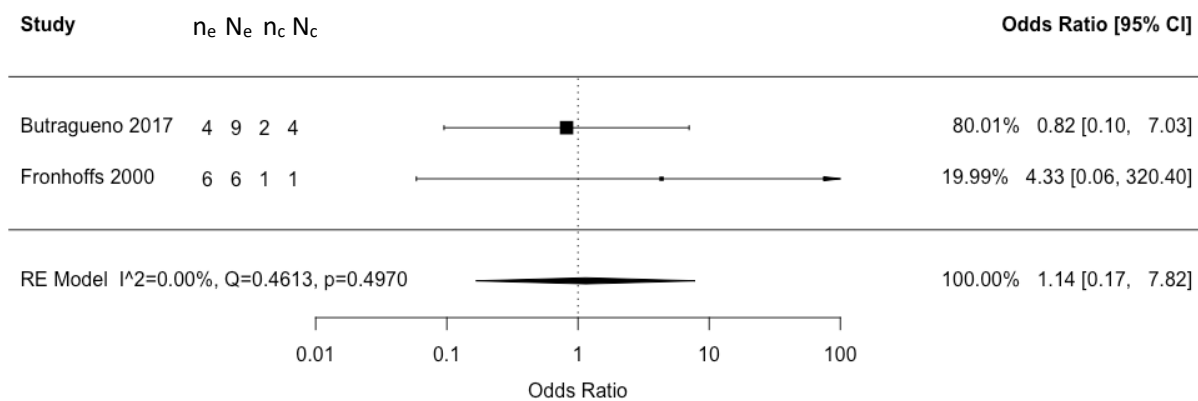

## 3. IVIG in all STSS patients: yes vs no (reference)

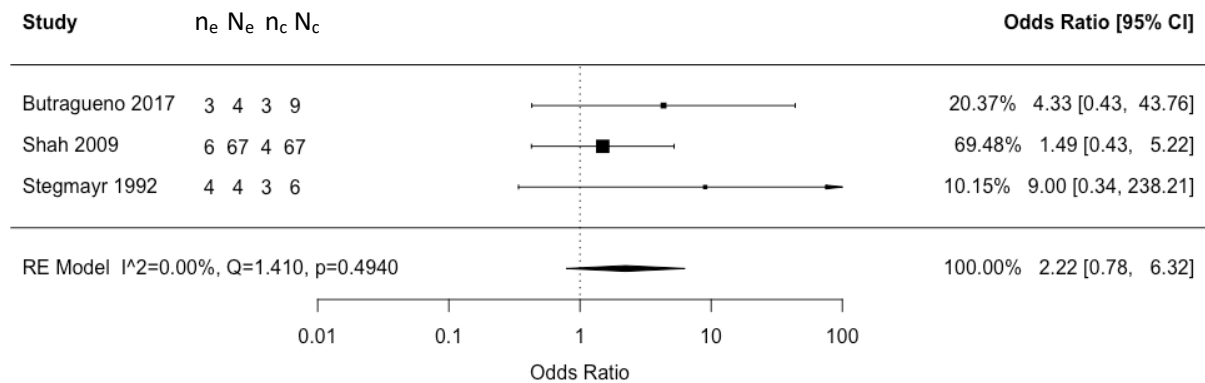

## 4. Necrotizing fasciitis: yes vs no (reference)

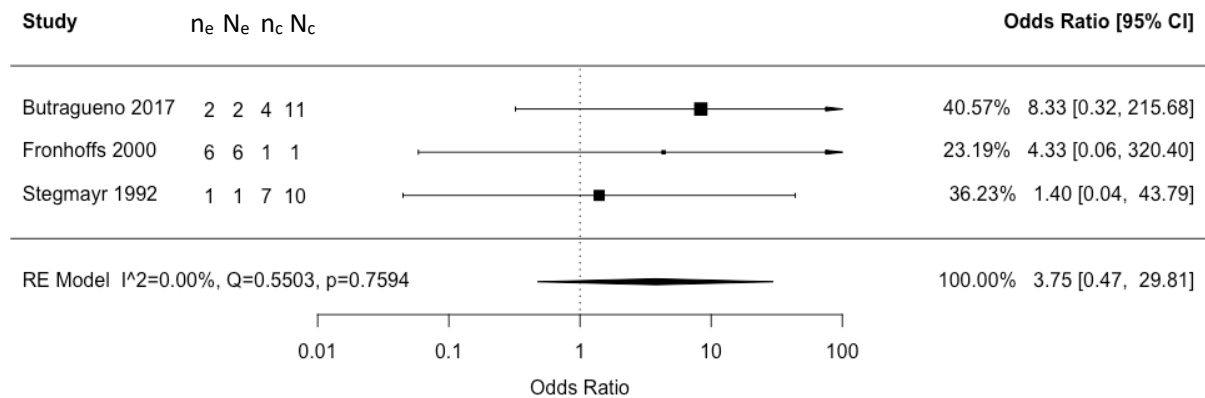

## 5. Hemodialysis: yes vs no (reference)

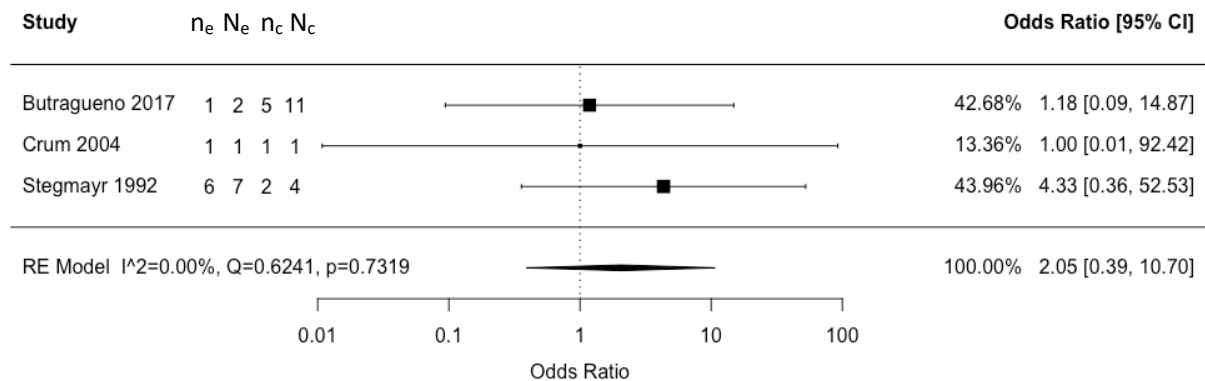

Hospital length-of-stay

1. IVIG: yes vs no (reference)

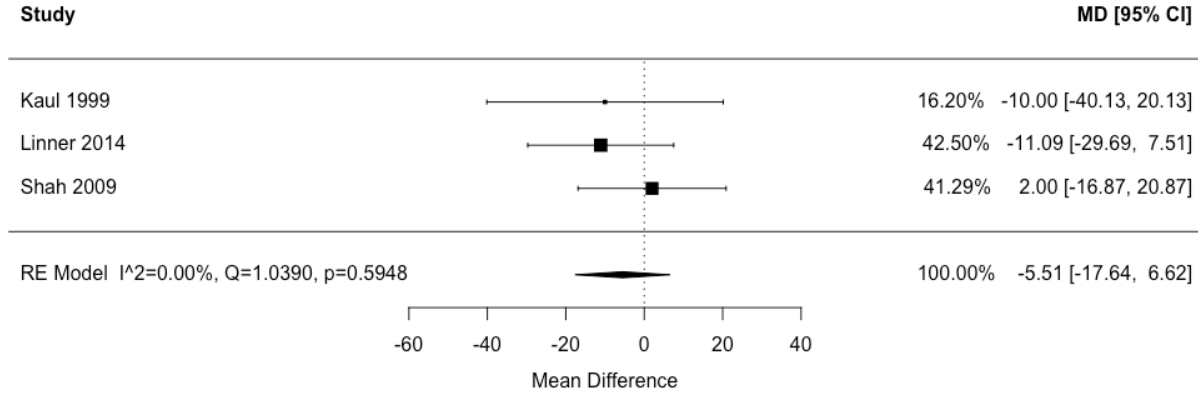

ICU length-of-stay

1. IVIG: yes vs no (reference)

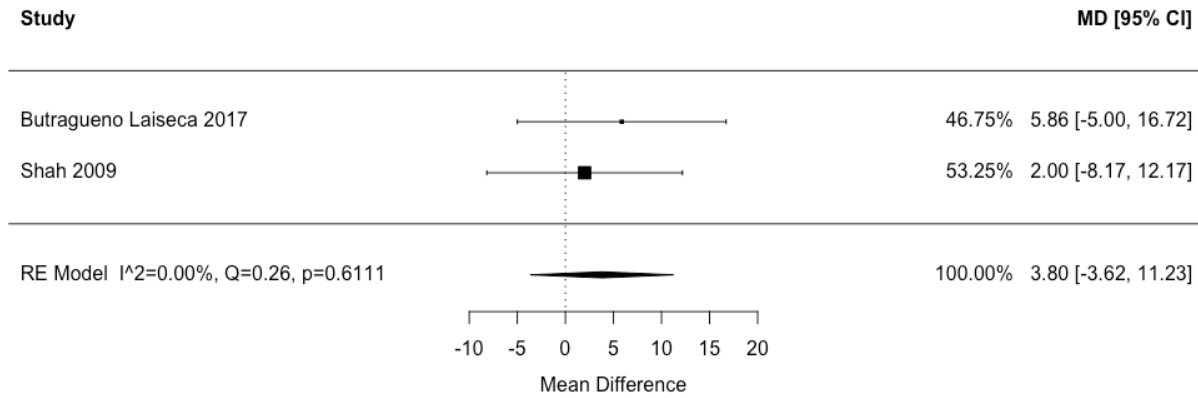

## Description of studies ineligible for meta-analysis by outcome

### Mortality

| Prognostic factor of interest        | N reporting | N analyzed | Reasons for exclusion from meta-analysis                                                                                                                      |
|--------------------------------------|-------------|------------|---------------------------------------------------------------------------------------------------------------------------------------------------------------|
| acute renal failure                  | 4           | 4          |                                                                                                                                                               |
| age                                  | 28          | 5          | n=17 case-series with <10 patients, precluding the aggregation of patient-level data; n=6 study population consisted of patients all within same age category |
| antibiotic                           | 3           | 3          |                                                                                                                                                               |
| clindamycin                          | 4           | 4          |                                                                                                                                                               |
| early hypotension                    | 0           | 0          |                                                                                                                                                               |
| emmtype                              | 7           | 0          | n=7 variability in reporting of molecular characteristics and comparators                                                                                     |
| hemodialysis                         | 4           | 4          |                                                                                                                                                               |
| immunocompromised                    | 5           | 4          | n=1 insufficient data for meta-analysis (only p value reported)                                                                                               |
| IVIG in all STSS patients            | 9           | 9          |                                                                                                                                                               |
| IVIG in clindamycin-treated patients | 6           | 6          |                                                                                                                                                               |
| NF                                   | 10          | 10         |                                                                                                                                                               |
| NSAIDs                               | 4           | 4          |                                                                                                                                                               |
| sex                                  | 12          | 12         |                                                                                                                                                               |
| timetoantibiotic                     | 1           | 0          | Meta-analysis precluded with only one study                                                                                                                   |

## (P)ICU admission

| Prognostic factor of interest        | N reporting | N analyzed | Reasons for exclusion from meta-analysis                                                                                                                                                                                                 |
|--------------------------------------|-------------|------------|------------------------------------------------------------------------------------------------------------------------------------------------------------------------------------------------------------------------------------------|
| acute renal failure                  | 1           | 0          | Meta-analysis precluded with only one study                                                                                                                                                                                              |
| age                                  | 9           | 0          | n=5 case-series with <10 patients, precluding the aggregation of patient-level data; n=3 study population consisted of patients all within same age category; n=1 eligible for analysis, but meta-analysis precluded with only one study |
| antibiotic                           | 2           | 2          |                                                                                                                                                                                                                                          |
| clindamycin                          | 1           | 0          | Meta-analysis precluded with only one study                                                                                                                                                                                              |
| early hypotension                    | 0           | 0          |                                                                                                                                                                                                                                          |
| emctype                              | 2           | 0          | n=2 variability in reporting of molecular characteristics and comparators                                                                                                                                                                |
| hemodialysis                         | 2           | 2          |                                                                                                                                                                                                                                          |
| immunocompromised                    | 1           | 0          | Meta-analysis precluded with only one study                                                                                                                                                                                              |
| IVIG in all STSS patients            | 3           | 3          |                                                                                                                                                                                                                                          |
| IVIG in clindamycin-treated patients | 0           | 0          |                                                                                                                                                                                                                                          |
| NF                                   | 3           | 3          |                                                                                                                                                                                                                                          |
| NSAIDs                               | 2           | 2          |                                                                                                                                                                                                                                          |
| sex                                  | 3           | 3          |                                                                                                                                                                                                                                          |
| timetoantibiotic                     | 0           | 0          |                                                                                                                                                                                                                                          |

## Clinical cure or improvement

| Prognostic factor of interest        | N reporting | N analyzed | Reasons for exclusion from meta-analysis                                                                                                                     |
|--------------------------------------|-------------|------------|--------------------------------------------------------------------------------------------------------------------------------------------------------------|
| acute renal failure                  | 1           | 0          | Meta-analysis precluded with only one study                                                                                                                  |
| age                                  | 8           | 0          | n=6 case-series with <10 patients, precluding the aggregation of patient-level data; n=2 study population consisted of patients all within same age category |
| antibiotic                           | 1           | 0          | Meta-analysis precluded with only one study                                                                                                                  |
| clindamycin                          | 1           | 0          | Meta-analysis precluded with only one study                                                                                                                  |
| earlyhypotension                     | 0           | 0          |                                                                                                                                                              |
| emctype                              | 0           | 0          |                                                                                                                                                              |
| hemodialysis                         | 3           | 3          |                                                                                                                                                              |
| immunocompromised                    | 0           | 0          |                                                                                                                                                              |
| IVIG in all STSS patients            | 2           | 2          |                                                                                                                                                              |
| IVIG in clindamycin-treated patients | 0           | 0          |                                                                                                                                                              |
| NF                                   | 2           | 2          |                                                                                                                                                              |
| NSAIDs                               | 1           | 0          | Meta-analysis precluded with only one study                                                                                                                  |
| sex                                  | 4           | 4          |                                                                                                                                                              |
| timetoantibiotic                     | 0           | 0          |                                                                                                                                                              |

## Mechanical ventilation

| Prognostic factor of interest        | N reporting | N analyzed | Reasons for exclusion from meta-analysis                                                                                                                     |
|--------------------------------------|-------------|------------|--------------------------------------------------------------------------------------------------------------------------------------------------------------|
| acute renal failure                  | 2           | 2          |                                                                                                                                                              |
| age                                  | 5           | 0          | n=3 case-series with <10 patients, precluding the aggregation of patient-level data; n=2 study population consisted of patients all within same age category |
| antibiotic                           | 0           | 0          |                                                                                                                                                              |
| clindamycin                          | 1           | 0          | Meta-analysis precluded with only one study                                                                                                                  |
| earlyhypotension                     | 0           | 0          |                                                                                                                                                              |
| emctype                              | 0           | 0          |                                                                                                                                                              |
| hemodialysis                         | 3           | 3          |                                                                                                                                                              |
| immunocompromised                    | 1           | 0          | Meta-analysis precluded with only one study                                                                                                                  |
| IVIG in all STSS patients            | 3           | 3          |                                                                                                                                                              |
| IVIG in clindamycin-treated patients | 0           | 0          |                                                                                                                                                              |
| NF                                   | 3           | 3          |                                                                                                                                                              |
| NSAIDs                               | 1           | 0          | Meta-analysis precluded with only one study                                                                                                                  |
| sex                                  | 3           | 3          |                                                                                                                                                              |
| timetoantibiotic                     | 0           | 0          |                                                                                                                                                              |

## Hospital length-of-stay

| Prognostic factor of interest        | N reporting | N analyzed | Reasons for exclusion from meta-analysis                                            |
|--------------------------------------|-------------|------------|-------------------------------------------------------------------------------------|
| acute renal failure                  | 0           | 0          |                                                                                     |
| age                                  | 2           | 0          | n=2 case-series with <10 patients, precluding the aggregation of patient-level data |
| antibiotic                           | 0           | 0          |                                                                                     |
| clindamycin                          | 0           | 0          |                                                                                     |
| early hypotension                    | 0           | 0          |                                                                                     |
| emctype                              | 0           | 0          |                                                                                     |
| hemodialysis                         | 0           | 0          |                                                                                     |
| immunocompromised                    | 0           | 0          |                                                                                     |
| IVIG in all STSS patients            | 3           | 3          |                                                                                     |
| IVIG in clindamycin-treated patients | 0           | 0          |                                                                                     |
| NF                                   | 0           | 0          |                                                                                     |
| NSAIDs                               | 1           | 0          | Meta-analysis precluded with only one study                                         |
| sex                                  | 1           | 0          | Meta-analysis precluded with only one study                                         |
| timetoantibiotic                     | 0           | 0          |                                                                                     |

## Duration of mechanical ventilation

| Prognostic factor of interest        | N reporting | N analyzed | Reasons for exclusion from meta-analysis    |
|--------------------------------------|-------------|------------|---------------------------------------------|
| acute renal failure                  | 0           | 0          |                                             |
| age                                  | 0           | 0          |                                             |
| antibiotic                           | 0           | 0          |                                             |
| clindamycin                          | 0           | 0          |                                             |
| early hypotension                    | 0           | 0          |                                             |
| emctype                              | 0           | 0          |                                             |
| hemodialysis                         | 0           | 0          |                                             |
| immunocompromised                    | 0           | 0          |                                             |
| IVIG in all STSS patients            | 1           | 0          | Meta-analysis precluded with only one study |
| IVIG in clindamycin-treated patients | 0           | 0          |                                             |
| NF                                   | 0           | 0          |                                             |
| NSAIDs                               | 0           | 0          |                                             |
| sex                                  | 0           | 0          |                                             |
| timetoantibiotic                     | 0           | 0          |                                             |



## ICU length-of-stay

| Prognostic factor of interest        | N reporting | N analyzed | Reasons for exclusion from meta-analysis                                                                                                                     |
|--------------------------------------|-------------|------------|--------------------------------------------------------------------------------------------------------------------------------------------------------------|
| acute renal failure                  | 0           | 0          |                                                                                                                                                              |
| age                                  | 3           | 0          | n=2 case-series with <10 patients, precluding the aggregation of patient-level data; n=1 study population consisted of patients all within same age category |
| antibiotic                           | 0           | 0          |                                                                                                                                                              |
| clindamycin                          | 1           | 0          | Meta-analysis precluded with only one study                                                                                                                  |
| early hypotension                    | 0           | 0          |                                                                                                                                                              |
| emctype                              | 0           | 0          |                                                                                                                                                              |
| hemodialysis                         | 0           | 0          |                                                                                                                                                              |
| immunocompromised                    | 0           | 0          |                                                                                                                                                              |
| IVIG in all STSS patients            | 2           | 2          |                                                                                                                                                              |
| IVIG in clindamycin-treated patients | 0           | 0          |                                                                                                                                                              |
| NF                                   | 1           | 0          | Meta-analysis precluded with only one study                                                                                                                  |
| NSAIDs                               | 1           | 0          | Meta-analysis precluded with only one study                                                                                                                  |
| sex                                  | 2           | 0          | n=1 study with one person in each group > cannot calculate mean; n=1 meta-analysis precluded with only one study                                             |
| timetoantibiotic                     | 0           | 0          |                                                                                                                                                              |

## Change in SOFA score from baseline

| Prognostic factor of interest        | N reporting | N analyzed | Reasons for exclusion from meta-analysis    |
|--------------------------------------|-------------|------------|---------------------------------------------|
| acute renal failure                  | 0           | 0          |                                             |
| age                                  | 0           | 0          |                                             |
| antibiotic                           | 0           | 0          |                                             |
| clindamycin                          | 0           | 0          |                                             |
| early hypotension                    | 0           | 0          |                                             |
| emctype                              | 0           | 0          |                                             |
| hemodialysis                         | 0           | 0          |                                             |
| immunocompromised                    | 0           | 0          |                                             |
| IVIG in all STSS patients            | 1           | 0          | Meta-analysis precluded with only one study |
| IVIG in clindamycin-treated patients | 0           | 0          |                                             |
| NF                                   | 0           | 0          |                                             |
| NSAIDs                               | 0           | 0          |                                             |
| sex                                  | 0           | 0          |                                             |
| timetoantibiotic                     | 0           | 0          |                                             |

## Functional status

| Prognostic factor of interest        | N reporting | N analyzed | Reasons for exclusion from meta-analysis |
|--------------------------------------|-------------|------------|------------------------------------------|
| acute renal failure                  | 0           | 0          |                                          |
| age                                  | 0           | 0          |                                          |
| antibiotic                           | 0           | 0          |                                          |
| clindamycin                          | 0           | 0          |                                          |
| early hypotension                    | 0           | 0          |                                          |
| emctype                              | 0           | 0          |                                          |
| hemodialysis                         | 0           | 0          |                                          |
| immunocompromised                    | 0           | 0          |                                          |
| IVIG in all STSS patients            | 0           | 0          |                                          |
| IVIG in clindamycin-treated patients | 0           | 0          |                                          |
| NF                                   | 0           | 0          |                                          |
| NSAIDs                               | 0           | 0          |                                          |
| sex                                  | 0           | 0          |                                          |
| timetoantibiotic                     | 0           | 0          |                                          |

## Health related quality of life

| Prognostic factor of interest        | N reporting | N analyzed | Reasons for exclusion from meta-analysis |
|--------------------------------------|-------------|------------|------------------------------------------|
| acute renal failure                  | 0           | 0          |                                          |
| age                                  | 0           | 0          |                                          |
| antibiotic                           | 0           | 0          |                                          |
| clindamycin                          | 0           | 0          |                                          |
| early hypotension                    | 0           | 0          |                                          |
| emctype                              | 0           | 0          |                                          |
| hemodialysis                         | 0           | 0          |                                          |
| immunocompromised                    | 0           | 0          |                                          |
| IVIG in all STSS patients            | 0           | 0          |                                          |
| IVIG in clindamycin-treated patients | 0           | 0          |                                          |
| NF                                   | 0           | 0          |                                          |
| NSAIDs                               | 0           | 0          |                                          |
| sex                                  | 0           | 0          |                                          |
| timetoantibiotic                     | 0           | 0          |                                          |

## Cost

| Prognostic factor of interest        | N reporting | N analyzed | Reasons for exclusion from meta-analysis    |
|--------------------------------------|-------------|------------|---------------------------------------------|
| acute renal failure                  | 0           | 0          |                                             |
| age                                  | 0           | 0          |                                             |
| antibiotic                           | 0           | 0          |                                             |
| clindamycin                          | 0           | 0          |                                             |
| early hypotension                    | 0           | 0          |                                             |
| emctype                              | 0           | 0          |                                             |
| hemodialysis                         | 0           | 0          |                                             |
| immunocompromised                    | 0           | 0          |                                             |
| IVIG in all STSS patients            | 1           | 0          | Meta-analysis precluded with only one study |
| IVIG in clindamycin-treated patients | 0           | 0          |                                             |
| NF                                   | 0           | 0          |                                             |
| NSAIDs                               | 0           | 0          |                                             |
| sex                                  | 0           | 0          |                                             |
| timetoantibiotic                     | 0           | 0          |                                             |

## Time to mortality

| Prognostic factor of interest        | N reporting | N analyzed | Reasons for exclusion from meta-analysis                                                                         |
|--------------------------------------|-------------|------------|------------------------------------------------------------------------------------------------------------------|
| acute renal failure                  | 0           | 0          |                                                                                                                  |
| age                                  | 0           | 0          |                                                                                                                  |
| antibiotic                           | 0           | 0          |                                                                                                                  |
| clindamycin                          | 0           | 0          |                                                                                                                  |
| early hypotension                    | 0           | 0          |                                                                                                                  |
| emctype                              | 0           | 0          |                                                                                                                  |
| hemodialysis                         | 0           | 0          |                                                                                                                  |
| immunocompromised                    | 0           | 0          |                                                                                                                  |
| IVIG in all STSS patients            | 2           | 0          | n=1 study with one person in each group > cannot calculate mean; n=1 meta-analysis precluded with only one study |
| IVIG in clindamycin-treated patients | 2           | 0          | n=1 study with one person in each group > cannot calculate mean; n=1 meta-analysis precluded with only one study |
| NF                                   | 0           | 0          |                                                                                                                  |
| NSAIDs                               | 0           | 0          |                                                                                                                  |
| sex                                  | 0           | 0          |                                                                                                                  |
| timetoantibiotic                     | 0           | 0          |                                                                                                                  |

## Time to clinical improvement or resolution of shock

| Prognostic factor of interest        | N reporting | N analyzed | Reasons for exclusion from meta-analysis    |
|--------------------------------------|-------------|------------|---------------------------------------------|
| acute renal failure                  | 0           | 0          |                                             |
| age                                  | 0           | 0          |                                             |
| antibiotic                           | 0           | 0          |                                             |
| clindamycin                          | 0           | 0          |                                             |
| early hypotension                    | 0           | 0          |                                             |
| emctype                              | 0           | 0          |                                             |
| hemodialysis                         | 0           | 0          |                                             |
| immunocompromised                    | 0           | 0          |                                             |
| IVIG in all STSS patients            | 1           | 0          | Meta-analysis precluded with only one study |
| IVIG in clindamycin-treated patients | 1           | 0          | Meta-analysis precluded with only one study |
| NF                                   | 0           | 0          |                                             |
| NSAIDs                               | 0           | 0          |                                             |
| sex                                  | 0           | 0          |                                             |
| timetoantibiotic                     | 0           | 0          |                                             |

## MOOSE (Meta-analyses Of Observational Studies in Epidemiology) Checklist

A reporting checklist for Authors, Editors, and Reviewers of Meta-analyses of Observational Studies. You must report the page number in your manuscript where you consider each of the items listed in this checklist. If you have not included this information, either revise your manuscript accordingly before submitting or note N/A.

| Reporting Criteria                                                                                              | Reported (Yes/No) | Reported on Page No. |
|-----------------------------------------------------------------------------------------------------------------|-------------------|----------------------|
| <b>Reporting of Background</b>                                                                                  |                   |                      |
| Problem definition                                                                                              |                   |                      |
| Hypothesis statement                                                                                            |                   |                      |
| Description of Study Outcome(s)                                                                                 |                   |                      |
| Type of exposure or intervention used                                                                           |                   |                      |
| Type of study design used                                                                                       |                   |                      |
| Study population                                                                                                |                   |                      |
| <b>Reporting of Search Strategy</b>                                                                             |                   |                      |
| Qualifications of searchers (eg, librarians and investigators)                                                  |                   |                      |
| Search strategy, including time period included in the synthesis and keywords                                   |                   |                      |
| Effort to include all available studies, including contact with authors                                         |                   |                      |
| Databases and registries searched                                                                               |                   |                      |
| Search software used, name and version, including special features used (eg, explosion)                         |                   |                      |
| Use of hand searching (eg, reference lists of obtained articles)                                                |                   |                      |
| List of citations located and those excluded, including justification                                           |                   |                      |
| Method for addressing articles published in languages other than English                                        |                   |                      |
| Method of handling abstracts and unpublished studies                                                            |                   |                      |
| Description of any contact with authors                                                                         |                   |                      |
| <b>Reporting of Methods</b>                                                                                     |                   |                      |
| Description of relevance or appropriateness of studies assembled for assessing the hypothesis to be tested      |                   |                      |
| Rationale for the selection and coding of data (eg, sound clinical principles or convenience)                   |                   |                      |
| Documentation of how data were classified and coded (eg, multiple raters, blinding, and interrater reliability) |                   |                      |
| Assessment of confounding (eg, comparability of cases and controls in studies where appropriate)                |                   |                      |

| Reporting Criteria                                                                                                                                                                                                                                                           | Reported (Yes/No) | Reported on Page No. |
|------------------------------------------------------------------------------------------------------------------------------------------------------------------------------------------------------------------------------------------------------------------------------|-------------------|----------------------|
| Assessment of study quality, including blinding of quality assessors; stratification or regression on possible predictors of study results                                                                                                                                   |                   |                      |
| Assessment of heterogeneity                                                                                                                                                                                                                                                  |                   |                      |
| Description of statistical methods (eg, complete description of fixed or random effects models, justification of whether the chosen models account for predictors of study results, dose-response models, or cumulative meta-analysis) in sufficient detail to be replicated |                   |                      |
| Provision of appropriate tables and graphics                                                                                                                                                                                                                                 |                   |                      |
| <b>Reporting of Results</b>                                                                                                                                                                                                                                                  |                   |                      |
| Table giving descriptive information for each study included                                                                                                                                                                                                                 |                   |                      |
| Results of sensitivity testing (eg, subgroup analysis)                                                                                                                                                                                                                       |                   |                      |
| Indication of statistical uncertainty of findings                                                                                                                                                                                                                            |                   |                      |
| <b>Reporting of Discussion</b>                                                                                                                                                                                                                                               |                   |                      |
| Quantitative assessment of bias (eg, publication bias)                                                                                                                                                                                                                       |                   |                      |
| Justification for exclusion (eg, exclusion of non-English-language citations)                                                                                                                                                                                                |                   |                      |
| Assessment of quality of included studies                                                                                                                                                                                                                                    |                   |                      |
| <b>Reporting of Conclusions</b>                                                                                                                                                                                                                                              |                   |                      |
| Consideration of alternative explanations for observed results                                                                                                                                                                                                               |                   |                      |
| Generalization of the conclusions (ie, appropriate for the data presented and within the domain of the literature review)                                                                                                                                                    |                   |                      |
| Guidelines for future research                                                                                                                                                                                                                                               |                   |                      |
| Disclosure of funding source                                                                                                                                                                                                                                                 |                   |                      |

Once you have completed this checklist, please save a copy and upload it as part of your submission. DO NOT include this checklist as part of the main manuscript document. It must be uploaded as a separate file.

# BMJ Open

## PROGNOSTIC FACTORS FOR STREPTOCOCCAL TOXIC SHOCK SYNDROME: SYSTEMATIC REVIEW AND META-ANALYSIS

|                                 |                                                                                                                                                                                                                                                                                                                                                                                                                                                                                                                                                                                    |
|---------------------------------|------------------------------------------------------------------------------------------------------------------------------------------------------------------------------------------------------------------------------------------------------------------------------------------------------------------------------------------------------------------------------------------------------------------------------------------------------------------------------------------------------------------------------------------------------------------------------------|
| Journal:                        | <i>BMJ Open</i>                                                                                                                                                                                                                                                                                                                                                                                                                                                                                                                                                                    |
| Manuscript ID                   | bmjopen-2022-063023.R1                                                                                                                                                                                                                                                                                                                                                                                                                                                                                                                                                             |
| Article Type:                   | Original research                                                                                                                                                                                                                                                                                                                                                                                                                                                                                                                                                                  |
| Date Submitted by the Author:   | 28-Jun-2022                                                                                                                                                                                                                                                                                                                                                                                                                                                                                                                                                                        |
| Complete List of Authors:       | Bartoszko, Jessica; McMaster University, Elias, Zeyad; University of Toronto, Department of Medicine Rudziak, Paulina; Western University, Department of Biology Lo, Carson KL; Hamilton, Department of Medicine Thabane, Lehana; Hamilton, Department of Health Research Methods, Evidence and Impact; Hamilton, Departments of Anesthesia and Pediatrics<br>Mertz, Dominik; Hamilton, Department of Health Research Methods, Evidence and Impact; Hamilton, Department of Medicine<br>Loeb, Mark; Hamilton, Department of Health Research Methods, Evidence and Impact; Hamilton |
| <b>Primary Subject Heading</b>: | Infectious diseases                                                                                                                                                                                                                                                                                                                                                                                                                                                                                                                                                                |
| Secondary Subject Heading:      | Evidence based practice                                                                                                                                                                                                                                                                                                                                                                                                                                                                                                                                                            |
| Keywords:                       | Epidemiology < INFECTIOUS DISEASES, EPIDEMIOLOGY, BACTERIOLOGY, GENERAL MEDICINE (see Internal Medicine)                                                                                                                                                                                                                                                                                                                                                                                                                                                                           |
|                                 |                                                                                                                                                                                                                                                                                                                                                                                                                                                                                                                                                                                    |

SCHOLARONE™  
Manuscripts





I, the Submitting Author has the right to grant and does grant on behalf of all authors of the Work (as defined in the below author licence), an exclusive licence and/or a non-exclusive licence for contributions from authors who are: i) UK Crown employees; ii) where BMJ has agreed a CC-BY licence shall apply, and/or iii) in accordance with the terms applicable for US Federal Government officers or employees acting as part of their official duties; on a worldwide, perpetual, irrevocable, royalty-free basis to BMJ Publishing Group Ltd ("BMJ") its licensees and where the relevant Journal is co-owned by BMJ to the co-owners of the Journal, to publish the Work in this journal and any other BMJ products and to exploit all rights, as set out in our [licence](#).

The Submitting Author accepts and understands that any supply made under these terms is made by BMJ to the Submitting Author unless you are acting as an employee on behalf of your employer or a postgraduate student of an affiliated institution which is paying any applicable article publishing charge ("APC") for Open Access articles. Where the Submitting Author wishes to make the Work available on an Open Access basis (and intends to pay the relevant APC), the terms of reuse of such Open Access shall be governed by a Creative Commons licence – details of these licences and which [Creative Commons](#) licence will apply to this Work are set out in our licence referred to above.

Other than as permitted in any relevant BMJ Author's Self Archiving Policies, I confirm this Work has not been accepted for publication elsewhere, is not being considered for publication elsewhere and does not duplicate material already published. I confirm all authors consent to publication of this Work and authorise the granting of this licence.

1  
2  
3 **PROGNOSTIC FACTORS FOR STREPTOCOCCAL TOXIC SHOCK SYNDROME:**  
4 **SYSTEMATIC REVIEW AND META-ANALYSIS**  
5  
6  
7

8 Jessica J Bartoszko HBSc<sup>1</sup>, Zeyad Elias BSc<sup>2</sup>, Paulina Rudziak BSc(c)<sup>3</sup>, Carson KL Lo MD<sup>4</sup>,  
9 Lehana Thabane PhD<sup>1,5,6</sup>, Dominik Mertz MD<sup>1,4,7,8</sup>, Mark Loeb MD<sup>1,7,8</sup>  
10  
11

12  
13 <sup>1</sup> Department of Health Research Methods, Evidence and Impact, McMaster University,  
14 Hamilton, Ontario, Canada  
15

16  
17 <sup>2</sup> Department of Medicine, University of Toronto, Toronto, Ontario, Canada  
18

19 <sup>3</sup> Department of Biology, Western University, London, Ontario, Canada  
20

21 <sup>4</sup> Division of Infectious Diseases, Department of Medicine, McMaster University, Hamilton,  
22 Ontario, Canada  
23

24 <sup>5</sup> Departments of Anesthesia and Pediatrics, McMaster University, Hamilton, Ontario, Canada  
25

26 <sup>6</sup> Biostatistics Unit, St. Joseph's Healthcare Hamilton, Hamilton, Ontario, Canada  
27

28 <sup>7</sup> Institute for Infectious Disease Research, McMaster University, Hamilton, Ontario, Canada  
29

30 <sup>8</sup> Department of Pathology and Molecular Medicine, McMaster University, Hamilton, Ontario,  
31 Canada  
32

33  
34 Corresponding author:  
35

36 Dr. Mark Loeb, [loebm@mcmaster.ca](mailto:loebm@mcmaster.ca), McMaster University, Hamilton, Canada, L8S 4L8  
37  
38

39 Key words: streptococcal toxic shock syndrome (STSS); systematic review; meta-analysis  
40  
41

42  
43 Word count: 4320  
44  
45  
46  
47  
48  
49  
50  
51  
52  
53  
54  
55  
56  
57  
58  
59  
60

## ABSTRACT

**Objective:** To quantify the prognostic effects of demographic and modifiable factors in streptococcal toxic shock syndrome (STSS).

**Methods and analysis:** We searched MEDLINE and EMBASE from inception to 6 August 2021, along with CINAHL from inception to 16 September 2021 and citations of included studies. Pairs of reviewers independently screened potentially eligible studies of patients with GAS-induced STSS that quantified the association between at least one prognostic factor and outcome of interest. We performed random-effects meta-analysis after duplicate data extraction and risk of bias assessments. We rated the certainty of evidence using the GRADE approach.

**Results:** One randomized trial and 39 observational studies were eligible (n=1,914 patients). We found a statistically significant association between clindamycin treatment and mortality (n=144; odds ratio [OR] 0.14, 95% CI 0.06 to 0.37), but the certainty of evidence was low. Within clindamycin-treated STSS patients, we found a statistically significant association between intravenous immunoglobulin (IVIG) treatment and mortality (n=188; OR 0.34, 95% CI 0.15 to 0.75), but the certainty of evidence was also low. The odds of mortality may increase in patients  $\geq 65$  years when compared to patients 18-64 years (n=396; OR 2.37, 95% CI 1.47 to 3.84), but the certainty of evidence was low. We are uncertain whether non-steroidal anti-inflammatory drugs (NSAIDs) increased the odds of mortality (n=50; OR 4.14, 95% CI 1.13 to 15.14; very low certainty). Results failed to show a significant association between any other prognostic factor and outcome combination (very low to low certainty evidence) and no studies quantified the association between a prognostic factor and morbidity post-infection in STSS survivors.

**Conclusions:** Treatment with clindamycin and within clindamycin-treated patients, IVIG, was each significantly associated with mortality, but the certainty was evidence was low. Future research should focus on morbidity post-infection in STSS survivors.

## STRENGTHS AND LIMITATIONS OF THIS STUDY

- Strengths of this review include its systematic and explicit search of the literature, capture of a wide breadth of patient-important outcomes within and outside of critical care and the use of meta-analysis to increase statistical power in studying relationships between prognostic factors and outcomes in STSS patients.
- These strengths directly address limitations of an existing narrative synthesis of STSS prognosis restricted to the critical care setting.
- In the absence of large cohort studies and randomized trials, conclusions for STSS prognosis in this review are limited by very low to low certainty evidence.
- A limitation of the evidence is the lack of long-term outcome data reported, including morbidity post-infection in STSS survivors.

## Introduction

Streptococcal toxic shock syndrome (STSS) is an acute and severe life-threatening complication of predominantly invasive Group A *Streptococcus* (GAS) infections. STSS is relatively uncommon, but is fatal [1]. Using US data from 2000 to 2004, the Center for Diseases Control and Prevention estimated an annual incidence rate of 0.2 cases per 100,000 people and a fatality rate of 36% [2]. STSS has important consequences for morbidity as well, in which patients may require radical surgical debridement, and patients with organ failure may have permanent respiratory and renal insufficiency [1].

Although extensive multidisciplinary clinical management efforts by intensivists, infectious disease specialists, and surgeons have curbed STSS all-cause mortality [1], data on the natural history of long-term sequelae in surviving patients, such as renal, respiratory and neuropsychiatric complications, are sparse [1-4]. Published studies of prognostic and treatment factors for STSS have consistently focused on associations with all-cause mortality [5-14], with few reporting on outcomes capturing the morbidity post-infection in STSS survivors [7, 12]. Furthermore, a thorough and systematic review to corroborate this evidence is lacking. A narrative review of STSS was limited by the lack of a systematic or explicit search of the literature, it included studies that were only narratively synthesized, and the focus was limited to studies within a critical care setting [1].

Understanding prognosis of STSS is important for patients, clinicians, and healthcare decision makers. We conducted a systematic review to summarize the prognostic and treatment factors, and outcomes of STSS. We aimed to capture a wide breadth of patient-important outcomes with follow up that included both short- and long-term outcomes within and outside of critical care.

## Materials and methods

We registered a protocol for the present systematic review and meta-analysis with PROSPERO (CRD42020166961) [15, 16]. We report this systematic review and meta-analysis following the guidelines of the Preferred Reporting Items for Systematic Reviews and Meta-Analyses (PRISMA) and Meta-analyses of Observational Studies in Epidemiology (MOOSE) checklists [17, 18]. Decisions regarding criteria for study inclusion, search methods for identification of

1  
2  
3 studies, data collection, risk of bias, evaluation of the certainty of evidence and analysis were  
4 established a priori.  
5  
6  
7

### 8 **Search strategy and selection criteria**

9

10 We searched MEDLINE (OVID interface, Epub Ahead of Print, In-Process & Other Non-  
11 Indexed Citations, 1946 to 6 August 2021) and EMBASE (OVID interface, 1974 to 6 August  
12 2021) from inception to 6 August 2021, with no restrictions on publication date. We searched the  
13 Cumulative Index to Nursing And Allied Health Literature (CINAHL), excluding MEDLINE  
14 records, from inception to 16 September 2021. We applied search filters for randomized  
15 controlled trials and non-randomized studies (cohort, case-control and case series with at least 2  
16 STSS patients) [19, 20], and tailored search strategies to each database. We restricted included  
17 studies to the English language to facilitate screening of full-texts [21, 22] and searched citations  
18 of included studies to minimize the risk of failing to include relevant studies.  
19  
20  
21  
22  
23  
24  
25  
26

27 We included studies of randomized and non-randomized designs that reported the association of  
28 at least one prognostic factor of interest on at least one outcome of interest, and compared GAS-  
29 induced STSS patients with the prognostic factor of interest (i.e. exposed) to GAS-induced STSS  
30 patients without the prognostic factor of interest (i.e. unexposed). Studies of patients with  
31 microbiologically confirmed STSS, probable cases of STSS and patients with clinical evidence  
32 of STSS as defined by study authors and generally consistent with the below criteria were  
33 eligible [3, 23]. Clinical evidence of STSS included hypotension and at least two of the  
34 following: renal impairment, coagulopathy, liver function abnormality, acute respiratory distress  
35 syndrome, generalized erythematous macular rash (with desquamation), soft-tissue necrosis  
36 (including necrotizing fasciitis, myositis or gangrene), or meningitis. Probable cases of STSS  
37 were defined as meeting clinical evidence with GAS isolated from a non-sterile site (e.g. throat,  
38 sputum, superficial skin lesion) or antigen detected. Confirmed cases of STSS were defined as  
39 meeting clinical evidence with GAS isolated from a sterile site (e.g. blood, cerebrospinal fluid,  
40 deep tissue specimen taken during surgery) [3, 23]. Demographic, comorbidity, infection,  
41 modifiable and process variables were prognostic factors of interest. Informed by clinical  
42 expertise in the review team, we selected outcomes based on importance to patients. Further, we  
43 aimed to capture the long-term sequelae in patients surviving STSS [1, 2, 4]. We chose the  
44  
45  
46  
47  
48  
49  
50  
51  
52  
53  
54  
55  
56  
57  
58  
59  
60

1  
2  
3 following outcomes of interest: (time to) mortality, hospital length-of-stay, pediatric (P)  
4 intensive care unit (ICU) admission, (P)ICU length-of-stay, mechanical ventilation, duration of  
5 mechanical ventilation, (time to) clinical cure/improvement or resolution of shock, change in  
6 Sequential Organ Failure Assessment (SOFA) score from baseline, functional status (e.g.  
7 physical component summary (PCS) score on the 36-item short form health survey (SF-36)) and  
8 health related quality of life (HRQoL). We also extracted on cost outcomes, which are relevant  
9 to hospital and patient payees.

10  
11  
12 We excluded case reports and conference abstracts, and studies in which the population was less  
13 than 80% GAS-induced STSS cases (i.e. toxic shock syndrome of bacterial aetiologies other than  
14 GAS made up more than 20% of the study population). Because prognostic evidence in STSS  
15 patients is scarce [1, 2, 4], we did not apply any restrictions based on analytical method (e.g.  
16 conducting an adjusted, multivariable analysis) or sample size.

17  
18  
19 Using a systematic review software, Rayyan [24], following training and calibration exercises,  
20 pairs of reviewers independently screened all titles and abstracts, followed by full-texts of  
21 records that were identified as potentially eligible. When necessary, consensus was reached  
22 through discussion between the review pair, and arbitration by a senior co-investigator in the  
23 absence of consensus.

### 24 25 26 27 28 29 30 31 32 33 34 35 36 37 38 **Data analysis**

39 For each eligible study, pairs of reviewers extracted data independently using a standardized,  
40 pilot tested data extraction form. Reviewers collected information on study characteristics (study  
41 design as defined by study authors, sample size, country), patient characteristics (age, sex),  
42 disease characteristics (confirmed vs probable STSS, presence of necrotizing fasciitis),  
43 prognostic factors and outcomes of interest (means or medians and measures of variability for  
44 continuous outcomes and the proportion of participants who experienced an event for  
45 dichotomous outcomes). If multiple time points were reported for outcomes of interest, we  
46 extracted all time points. To minimize risk of confounding associated with prognostic effect  
47 estimates on dichotomous outcomes in non-randomized studies, we preferentially extracted  
48 adjusted odds ratios (ORs) and corresponding 95% confidence intervals (CI) over proportions  
49  
50  
51  
52  
53  
54  
55  
56  
57  
58  
59  
60

1  
2  
3 when both were reported. We used the proportions to calculate crude ORs when no adjusted ORs  
4 were provided. Reviewers resolved discrepancies by discussion and, when necessary, with  
5 adjudication by a senior co-investigator.  
6  
7

8  
9  
10 Following training and calibration exercises, reviewers, independently and in duplicate, used the  
11 Quality in Prognosis Studies (QUIPS) tool to rate each prognostic factor and outcome  
12 combination at low, moderate or high risk of bias. Based on prespecified sets of questions, we  
13 assessed risk of bias across the following domains: participation, attrition, prognostic factor  
14 measurement, outcome measurement, confounding, and statistical analysis and reporting [25].  
15 For studies addressing more than one prognostic factor and outcome combination, we reported  
16 the highest risk of bias rating among the prognostic factor and outcome combinations within a  
17 study for each domain. In addition to assessing risk of bias at the domain-level as outlined in the  
18 QUIPS tool, we applied the following rules to assess risk of bias overall at the study-level. We  
19 rated overall study risk of bias as low if the study was prospective and five or more domains  
20 were assessed as low risk of bias, and high if two or more domains were assessed as high risk of  
21 bias. All other studies were rated as moderate risk of bias overall. Due to high risk of selection  
22 bias and residual confounding, we rated all case series as high risk of bias overall. Reviewer  
23 pairs resolved discrepancies by discussion and, when needed, with adjudication by a senior co-  
24 investigator.  
25  
26  
27  
28  
29  
30  
31  
32  
33  
34  
35  
36  
37

38 Pairs of reviewers used the grading of recommendations, assessment, development, and  
39 evaluation (GRADE) approach to independently assess the certainty of prognostic evidence for  
40 each meta-analysed outcome. Criteria for rating the certainty for each prognostic factor and  
41 outcome as high, moderate, low, or very low, included considerations of risk of bias,  
42 inconsistency, indirectness, size and precision of the association and publication bias [26, 27].  
43 Judgments of imprecision for this systematic review were made using a minimally contextualised  
44 approach. This approach considers whether confidence intervals include the null effect. The  
45 supplementary file presents the detailed guidance we developed to facilitate the certainty of the  
46 evidence assessment in this review. To facilitate interpretation of the results in which the  
47 summary measure was an OR, we used the median event rate in the reference group of studies  
48 reporting proportions to calculate baseline risks and subsequently calculated absolute effects.  
49  
50  
51  
52  
53  
54  
55  
56  
57  
58  
59  
60



1  
2  
3 GRADE evidence summaries (Summary of Findings tables) were generated in the MAGIC  
4 Authoring and Publication Platform ([www.magicapp.org](http://www.magicapp.org)).  
5  
6  
7

8 When at least two included studies reported on the same prognostic factor and outcome in  
9 patients with GAS-induced STSS, we conducted DerSimonian and Laird random-effects meta-  
10 analyses using the *metafor* package in R version 4.0.4 (R Studio, Boston, MA, USA) [28]. We  
11 summarised the effects of prognostic factors on dichotomous outcomes using ORs and  
12 corresponding 95% CI, and on continuous outcomes using mean differences and corresponding  
13 95% CI. For prognostic factor and dichotomous outcome combinations in which every patient in  
14 the reference arm experienced the outcome, we summarised the effects by directly calculating  
15 risk differences and corresponding 95% CI. We set the criterion for statistical significance at  
16  $\alpha = 0.05$ . Visual inspection of forest plots and the chi-square test were performed to evaluate  
17 heterogeneity. We interpreted an  $I^2$  statistic value of 0%-40%, 30%-60%, 50%-90%, or 75%-  
18 100% as not likely important, moderate, substantial, or considerable heterogeneity, respectively  
19 [29]. If an  $I^2$  statistic value was within a range of overlapping values (e.g. 80%), we would  
20 interpret heterogeneity as more important (e.g. considerable instead of substantial) if we  
21 observed inconsistent magnitudes and directions of summary estimates upon visual inspection of  
22 the forest plots, and the chi-square test was significant [29]. For meta-analyses of continuous  
23 outcomes, we imputed means and standard deviations for studies reporting medians and  
24 (interquartile) ranges, respectively [30, 31].  
25  
26  
27  
28  
29  
30  
31  
32  
33  
34  
35  
36  
37  
38

39 Patient-level data from case-series were aggregated when possible to enable comparative  
40 analysis via meta-analysis. We planned to perform a regression analysis for each study for which  
41 age was reported at the patient level to generate a study and age category (0 to 17 years old vs 18  
42 to 64 years old vs 65 years old or older) specific OR that could be used in meta-analysis when a  
43 study had at least 10 observations for continuous outcomes and 10 events for dichotomous  
44 outcomes; however, no study met the sample size or event number requirements. Further,  
45 scarcity and variability of data precluded our plan to narratively synthesize the evidence from  
46 included studies for which meta-analysis of a prognostic factor and outcome combination was  
47 not possible.  
48  
49  
50  
51  
52  
53  
54  
55  
56  
57  
58  
59  
60

1  
2  
3 The analysis plan included performing subgroup analyses of STSS patients treated with  
4 clindamycin vs no clindamycin, STSS patients with necrotizing fasciitis vs without necrotizing  
5 fasciitis, age (0 to 17 years old vs 18 to 64 years old vs 65 years old or older), sex (male vs  
6 female) and risk of bias (high vs moderate vs low) when at least two studies were present for  
7 each subgroup. Because select meta-analyses were limited by small numbers of events, we  
8 performed a post-hoc sensitivity analysis using the Peto method for meta-analysis, which is  
9 recommended for meta-analysis of rare events [32], and compared the results to those from the  
10 DerSimonian and Laird method we applied in this review.  
11  
12  
13  
14  
15  
16  
17

### 18 **Patient and public involvement**

19 It was not appropriate or possible to involve patients or the public in the design, or conduct, or  
20 reporting, or dissemination plans of our research.  
21  
22  
23  
24

### 25 **Results**

26 After screening 25,397 titles and abstracts and 282 full texts, 40 studies that reported on the  
27 association between at least one prognostic factor and outcome of interest in STSS patients  
28 proved eligible (Figure 1). All but one study (39/40, 98%) were non-randomized. Eligible studies  
29 were published between 1989 and 2021, ranged in sample size from 2 to 476, included 1,914  
30 STSS patients in total and were conducted in 22 different countries, most commonly in the  
31 United States (15/40, 38%).  
32  
33  
34  
35  
36  
37  
38

39 Table 1 describes the characteristics of included studies reporting on the association of at least  
40 one prognostic factor and outcome of interest. The supplementary data includes additional study  
41 characteristics for each study. Of the 40 included studies, 28 (70%) reported on demographic  
42 prognostic factors of interest, 5 (13%) medical history of being immunocompromised, 11 (28%)  
43 early disease characteristics, and 16 (40%) treatment. Of the dichotomous outcomes, mortality  
44 was most commonly reported (35/40, 88%), followed by (P)ICU admission (10/40, 25%),  
45 clinical cure or improvement (8/40, 20%) and need for mechanical ventilation (6/40, 15%). Few  
46 studies reported on hospital (3/40, 8%) and ICU length-of-stay (2/40, 5%). Two studies reported  
47 on time to mortality in days [7, 33]; however, only one reported sufficient data precluding meta-  
48 analysis [7]. One study each reported on cost [14], change in SOFA score [7], time to clinical  
49  
50  
51  
52  
53  
54  
55  
56  
57  
58  
59  
60

improvement or resolution of shock [7] and duration of mechanical ventilation [10] precluding meta-analysis for these continuous outcomes. No studies quantified the association between a prognostic factor and functional status or health related quality of life outcomes. A multivariable analysis was conducted in two (5%) of the included studies [10, 11]. A total of 19 of the 40 studies were cohort studies (authors reported on at least one comparative analysis), 18 were case series (authors did not report a comparative analysis) and 2 were case-control studies. To meta-analyse the data, we aggregated the data from the individual patients the case series reported on. Further, we pooled the one randomized study [7] with non-randomized studies in meta-analyses and included patients receiving intravenous or intramuscular IVIG from one non-randomized study [34].

**Table 1. Study characteristics. Values are numbers (percentages) of studies unless stated otherwise.**

| Characteristics              | (40 studies, 1914 patients) |
|------------------------------|-----------------------------|
| Range of publication year    | 1989 to 2021                |
| Median (IQR) No. of patients | 11 (5 to 29)                |
| Geographical region:         |                             |
| North America                | 19 (48)                     |
| Europe                       | 14 (35)                     |
| Central/South America        | 0 (0)                       |
| Asia                         | 3 (7)                       |
| Other                        | 4 (10)                      |
| Study design:                |                             |
| Randomized trial             | 1 (2)                       |
| Cohort                       | 19 (48)                     |
| Case-control                 | 2 (5)                       |
| Case-series                  | 18 (45)                     |
| Case definition:             |                             |
| Probable STSS patients       | 115 (6)                     |
| Confirmed STSS patients      | 223 (12)                    |
| Prognostic factor type:      |                             |
| Demographic                  | 28 (70)                     |
| Medical history              | 5 (13)                      |
| Early disease                | 11 (28)                     |
| Treatment                    | 16 (40)                     |

IQR=interquartile range

1  
2  
3 STSS=streptococcal toxic shock syndrome

4 Medical history included prognostic variable: immunocompromised

5 Early disease included prognostic variables: necrotizing fasciitis, acute renal failure  
6  
7

8 The supplementary material includes the forest plots depicting the studies included in the meta-  
9 analysis of each prognostic factor-outcome combination. It also includes the list of studies  
10 reporting on prognostic factor-outcome combinations of interest that were not eligible for any  
11 meta-analysis, along with the reasons for exclusion from meta-analysis.  
12  
13  
14  
15

### 16 17 **Risk of bias in included studies**

18 The supplementary file presents the risk of bias assessment of the 40 included studies. The  
19 majority of studies were rated as high risk of bias overall owing to residual confounding and lack  
20 of adjustment for confounding in statistical analyses (36/40, 90%) [2, 5, 6, 10, 33-64]. Three  
21 studies were rated at moderate risk of bias overall [7, 14, 65] and one at low risk of bias overall  
22 [11].  
23  
24  
25  
26  
27  
28

### 29 **Prognostic factors for mortality**

30 Eleven prognostic factors from 31 studies including 1339 patients were eligible for analysis  
31 (table 2, supplementary data). We found a statistically significant association between  
32 clindamycin treatment and mortality (figure 2A; n=144; odds ratio [OR] 0.14, 95% CI 0.06 to  
33 0.37), but the certainty of evidence was low. Within clindamycin-treated STSS patients, we  
34 found a statistically significant association between intravenous immunoglobulin (IVIG)  
35 treatment and mortality (figure 2B; n=188; OR 0.34, 95% CI 0.15 to 0.75), but the certainty of  
36 evidence was also low. We are uncertain whether IVIG treatment reduces the odds of mortality  
37 in all STSS patients regardless of concurrent clindamycin treatment (n=365, OR 0.37, 95% CI  
38 0.17 to 0.80; very low certainty of evidence). The odds of mortality may increase in patients  $\geq 65$   
39 years when compared to patients 18-64 years (n=396; OR 2.37, 95% CI 1.47 to 3.84), but the  
40 certainty of evidence was low. We are less certain whether the same is true for patients  $\geq 65$  years  
41 compared to patients  $< 18$  years (n=136, OR 10.66, 95% CI 1.28 to 88.57; very low certainty of  
42 evidence). We are also uncertain whether NSAIDs increase the odds of mortality (n=50, OR  
43 4.14, 95% CI 1.13 to 15.14; very low certainty of evidence). Very low certainty evidence failed  
44 to show a significant association with any other prognostic factor and mortality in STSS patients:  
45  
46  
47  
48  
49  
50  
51  
52  
53  
54  
55  
56  
57  
58  
59  
60

male vs female (n=76, OR 0.91, 95% CI 0.34 to 2.46), patients <18 years vs patients 18 to 64 years (n=694, OR 0.54, 95% CI 0.15 to 1.94), immunocompromised vs not immunocompromised (n=33, OR 1.65, 95% CI 0.33 to 8.26), necrotizing fasciitis vs no necrotizing fasciitis (n=840, OR 0.81, 95% CI 0.51 to 1.29), acute renal failure vs no acute renal failure (n=91, OR 2.50, 95% CI 0.97 to 6.42), hemodialysis vs no hemodialysis (n=42, OR 1.94, 95% CI 0.22 to 16.99) and any antibiotic vs no antibiotic (n=19, OR 0.48, 95% CI 0.05 to 4.76).

**Table 2. Summary of findings for prognostic factor – outcome meta-analyses.**

| Prognostic factor                                                  | Number of patients (studies) | Odds ratio (95% confidence interval) | Absolute effect estimates           |                             | GRADE: Certainty of the Evidence                                                               |
|--------------------------------------------------------------------|------------------------------|--------------------------------------|-------------------------------------|-----------------------------|------------------------------------------------------------------------------------------------|
|                                                                    |                              |                                      | Risk without prognostic factor      | Risk with prognostic factor |                                                                                                |
| <b>MORTALITY</b>                                                   |                              |                                      |                                     |                             |                                                                                                |
| Demographic                                                        |                              |                                      |                                     |                             |                                                                                                |
| Male vs Female                                                     | 76 (12)                      | 0.91 (0.34 to 2.46)                  | 250 per 1000<br>-17 (-148 to 201)   | 233 per 1000                | <b>Very low</b><br>Due to very serious risk of bias and imprecision                            |
| <18 vs 18-64 years                                                 | 694 (5)                      | 0.54 (0.15 to 1.94)                  | 234 per 1000<br>-92 (-190 to 138)   | 142 per 1000                | <b>Very low</b><br>Due to very serious risk of bias and imprecision, and serious inconsistency |
| ≥65 vs <18 years                                                   | 136 (2)                      | 10.66 (1.28 to 88.57)*               | 50 per 1000<br>309 (13 to 773)      | 359 per 1000                | <b>Very low</b><br>Due to very serious risk of bias and serious imprecision                    |
| ≥65 vs 18-64 years                                                 | 396 (2)                      | 2.37 (1.47 to 3.84)*                 | 193 per 1000<br>169 (67 to 286)     | 362 per 1000                | <b>Low</b><br>Due to very serious risk of bias                                                 |
| Medical history                                                    |                              |                                      |                                     |                             |                                                                                                |
| Immunocompromised vs Not Immunocompromised                         | 33 (4)                       | 1.65 (0.33 to 8.26)                  | 438 per 1000<br>125 (-233 to 428)   | 563 per 1000                | <b>Very low</b><br>Due to very serious risk of bias and imprecision                            |
| Early disease                                                      |                              |                                      |                                     |                             |                                                                                                |
| Acute Renal Failure vs No Acute Renal Failure                      | 91 (4)                       | 2.50 (0.97 to 6.42)                  | NA per 1000<br>140 (-60 to 330)     | NA per 1000                 | <b>Very low</b><br>Due to very serious risk of bias and imprecision                            |
| Necrotizing Fasciitis vs No Necrotizing Fasciitis                  | 840 (10)                     | 0.81 (0.51 to 1.29)                  | 347 per 1000<br>-46 (-134 to 60)    | 301 per 1000                | <b>Very low</b><br>Due to very serious risk of bias and imprecision                            |
| Treatment                                                          |                              |                                      |                                     |                             |                                                                                                |
| IVIG vs No IVIG (all STSS patients)                                | 365 (9)                      | 0.37 (0.17 to 0.80)*                 | 231 per 1000<br>-131 (-182 to -37)  | 100 per 1000                | <b>Very low</b><br>Due to very serious risk of bias and serious imprecision                    |
| IVIG vs No IVIG (subset of STSS patients treated with clindamycin) | 188 (6)                      | 0.34 (0.15 to 0.75)*                 | 300 per 1000<br>-173 (-240 to -57)  | 127 per 1000                | <b>Low</b><br>Due to serious risk of bias and imprecision                                      |
| Any Antibiotic vs No Antibiotic                                    | 19 (3)                       | 0.48 (0.05 to 4.76)                  | NA per 1000<br>-120 (-490 to 260)   | NA per 1000                 | <b>Very low</b><br>Due to very serious risk of bias and imprecision                            |
| Clindamycin vs No Clindamycin Antibiotic                           | 144 (4)                      | 0.14 (0.06 to 0.37)*                 | 800 per 1000<br>-441 (-606 to -203) | 359 per 1000                | <b>Low</b><br>Due to serious risk of bias and imprecision                                      |
| Hemodialysis vs No Hemodialysis                                    | 42 (4)                       | 1.94 (0.22 to 16.99)                 | 107 per 1000<br>82 (-81 to 564)     | 189 per 1000                | <b>Very low</b><br>Due to very serious risk of bias and imprecision                            |

|                                                   |         |                       |                    |              |                                                                             |
|---------------------------------------------------|---------|-----------------------|--------------------|--------------|-----------------------------------------------------------------------------|
| NSAIDs vs No NSAIDs                               | 50 (4)  | 4.14 (1.13 to 15.14)* | 100 per 1000       | 315 per 1000 | <b>Very low</b><br>Due to very serious risk of bias and serious imprecision |
|                                                   |         |                       | 215 (12 to 527)    |              |                                                                             |
| <b>ICU ADMISSION</b>                              |         |                       |                    |              |                                                                             |
| Demographic                                       |         |                       |                    |              |                                                                             |
| Male vs Female                                    | 19 (3)  | 2.87 (0.29 to 28.27)  | NA per 1000        | NA per 1000  | <b>Very low</b><br>Due to very serious risk of bias and imprecision         |
|                                                   |         |                       | 150 (-160 to 450)  |              |                                                                             |
| Early disease                                     |         |                       |                    |              |                                                                             |
| Necrotizing Fasciitis vs No Necrotizing Fasciitis | 28 (3)  | 0.74 (0.12 to 4.48)   | 900 per 1000       | 869 per 1000 | <b>Very low</b><br>Due to very serious risk of bias and imprecision         |
|                                                   |         |                       | -31 (-381 to 76)   |              |                                                                             |
| Treatment                                         |         |                       |                    |              |                                                                             |
| IVIG vs No IVIG (all STSS patients)               | 156 (3) | 1.09 (0.43 to 2.77)   | 833 per 1000       | 845 per 1000 | <b>Very low</b><br>Due to very serious risk of bias and imprecision         |
|                                                   |         |                       | 12 (-151 to 100)   |              |                                                                             |
| Any Antibiotic vs No Antibiotic                   | 14 (2)  | 4.60 (0.29 to 72.89)  | 500 per 1000       | 821 per 1000 | <b>Very low</b><br>Due to very serious risk of bias and imprecision         |
|                                                   |         |                       | 321 (-275 to 486)  |              |                                                                             |
| Hemodialysis vs No Hemodialysis                   | 13 (2)  | 3.25 (0.21 to 50.35)  | 875 per 1000       | 958 per 1000 | <b>Very low</b><br>Due to very serious risk of bias and imprecision         |
|                                                   |         |                       | 83 (-280 to 122)   |              |                                                                             |
| NSAIDs vs No NSAIDs                               | 15 (2)  | 0.86 (0.06 to 12.48)  | NA per 1000        | NA per 1000  | <b>Very low</b><br>Due to very serious risk of bias and imprecision         |
|                                                   |         |                       | -10 (-430 to 400)  |              |                                                                             |
| <b>CLINICAL CURE OR IMPROVEMENT</b>               |         |                       |                    |              |                                                                             |
| Demographic                                       |         |                       |                    |              |                                                                             |
| Male vs Female                                    | 23 (4)  | 3.33 (0.47 to 23.59)  | 875 per 1000       | 959 per 1000 | <b>Very low</b><br>Due to very serious risk of bias and imprecision         |
|                                                   |         |                       | 84 (-108 to 119)   |              |                                                                             |
| Early disease                                     |         |                       |                    |              |                                                                             |
| Necrotizing Fasciitis vs No Necrotizing Fasciitis | 24 (2)  | 0.34 (0.02 to 5.20)   | 950 per 1000       | 866 per 1000 | <b>Very low</b><br>Due to very serious risk of bias and serious imprecision |
|                                                   |         |                       | -84 (-675 to 40)   |              |                                                                             |
| Treatment                                         |         |                       |                    |              |                                                                             |
| IVIG vs No IVIG (in all STSS patients)            | 23 (2)  | 0.27 (0.02 to 3.76)   | NA per 1000        | NA per 1000  | <b>Very low</b><br>Due to very serious risk of bias and imprecision         |
|                                                   |         |                       | -100 (-350 to 140) |              |                                                                             |
| Hemodialysis vs No Hemodialysis                   | 26 (3)  | 1.43 (0.15 to 14.08)  | NA per 1000        | NA per 1000  | <b>Very low</b><br>Due to very serious risk of bias and imprecision         |
|                                                   |         |                       | 50 (-240 to 340)   |              |                                                                             |
| <b>NEED FOR MECHANICAL VENTILATION</b>            |         |                       |                    |              |                                                                             |
| Demographic                                       |         |                       |                    |              |                                                                             |
| Male vs Female                                    | 21 (3)  | 2.09 (0.32 to 13.74)  | NA per 1000        | NA per 1000  | <b>Very low</b><br>Due to very serious risk of bias and imprecision         |
|                                                   |         |                       | 120 (-200 to 440)  |              |                                                                             |
| Early disease                                     |         |                       |                    |              |                                                                             |
| Acute Renal Failure vs No Acute Renal Failure     | 20 (2)  | 1.14 (0.17 to 7.82)   | 750 per 1000       | 774 per 1000 | <b>Very low</b><br>Due to very serious risk of bias and imprecision         |
|                                                   |         |                       | 24 (-412 to 209)   |              |                                                                             |
| Necrotizing Fasciitis vs No Necrotizing Fasciitis | 31 (3)  | 3.75 (0.47 to 29.81)  | 700 per 1000       | 897 per 1000 | <b>Very low</b><br>Due to very serious risk of bias and imprecision         |
|                                                   |         |                       | 197 (-177 to 286)  |              |                                                                             |
| Treatment                                         |         |                       |                    |              |                                                                             |
| IVIG vs No IVIG (in all STSS patients)            | 157 (3) | 2.22 (0.78 to 6.32)   | 333 per 1000       | 526 per 1000 | <b>Very low</b><br>Due to very serious risk of bias and imprecision         |
|                                                   |         |                       | 193 (-53 to 426)   |              |                                                                             |
| Hemodialysis vs No Hemodialysis                   | 26 (3)  | 2.05 (0.39 to 10.70)  | 500 per 1000       | 672 per 1000 | <b>Very low</b>                                                             |

|                                      |         |    |                                                                          |                                                                             |
|--------------------------------------|---------|----|--------------------------------------------------------------------------|-----------------------------------------------------------------------------|
|                                      |         |    | 172 (-219 to 415)                                                        | Due to very serious risk of bias and imprecision                            |
| DURATION OF HOSPITALIZATION          |         |    |                                                                          |                                                                             |
| Treatment                            |         |    |                                                                          |                                                                             |
| IVIG vs no IVIG (all STSS patients)  | 201 (3) | NA | NA per 1000<br>On average, 5.51 fewer days<br>(17.64 fewer to 6.62 more) | <b>Low</b><br>Due to serious risk of bias and imprecision                   |
| DURATION OF INTENSIVE CARE UNIT STAY |         |    |                                                                          |                                                                             |
| Treatment                            |         |    |                                                                          |                                                                             |
| IVIG vs no IVIG (all STSS patients)  | 131 (2) | NA | NA per 1000<br>On average, 3.80 more days<br>(3.62 fewer to 11.23 more)  | <b>Very low</b><br>Due to very serious risk of bias and serious imprecision |

\*statistical evidence of an association

### Prognostic factors for ICU admission

Six prognostic factors from eight studies including 174 patients were eligible for analysis (table 2, supplementary data). We found no statistical evidence of an association between any prognostic factor and ICU admission: male vs female sex (n=19, OR 2.87, 95% CI 0.29 to 28.27), necrotizing fasciitis vs no necrotizing fasciitis (n=28, OR 0.74, 95% CI 0.12 to 4.48), hemodialysis vs no hemodialysis (n=13, OR 3.25, 95% CI 0.21 to 50.35), NSAIDs vs no NSAIDs (n=15, OR 0.86, 95% CI 0.06 to 12.48), IVIG treatment vs no IVIG treatment (n=156, OR 1.09, 95% CI 0.43 to 2.77) and antibiotic treatment vs no antibiotic treatment (n=14, OR 4.60, 95% CI 0.29 to 72.98). The certainty of all ICU admission evidence was very low due to very serious risk of bias and imprecision.

### Prognostic factors for clinical cure or improvement

Four prognostic factors from six studies including 38 STSS patients were eligible for analysis (table 2, supplementary data). We found no statistical evidence of an association between any prognostic factor and clinical cure or improvement: male vs female sex (n=23, OR 3.33, 95% CI 0.47 to 23.59), necrotizing fasciitis vs no necrotizing fasciitis (n=24, OR 0.34, 95% CI 0.02 to 5.20), hemodialysis vs no hemodialysis (n=26, OR 1.43, 95% CI 0.15 to 14.08) and IVIG treatment vs no IVIG treatment (n=23, OR 0.27, 95% CI 0.02 to 3.76). The certainty of all clinical cure or improvement evidence was very low due to very serious risk of bias and serious or very serious imprecision.

### Prognostic factors for mechanical ventilation

Five prognostic factors from six studies including 170 STSS patients were eligible for analysis (table 2, supplementary data). We found no statistical evidence of an association between any prognostic factor and need for mechanical ventilation: male vs female sex (n=21, OR 2.09, 95% CI 0.32 to 13.74), necrotizing fasciitis vs no necrotizing fasciitis (n=31, OR 3.75, 95% CI 0.47 to 29.81), acute renal failure vs no acute renal failure (n=20, OR 1.14, 95% CI 0.17 to 7.82), hemodialysis vs no hemodialysis (n=26, OR 2.05, 95% CI 0.39 to 10.70) and IVIG treatment vs no IVIG treatment (n=157, OR 2.22, 95% CI 0.78 to 6.32). The certainty of all need for mechanical ventilation evidence was very low due to very serious risk of bias and imprecision.

### **Prognostics factors for hospital length-of-stay**

One prognostic factor from three studies including 201 STSS patients was eligible for analysis (table 2, supplementary data). Low certainty evidence – due to serious risk of bias and imprecision – provides no support for an association between IVIG treatment and hospital length-of-stay, when compared to no IVIG treatment (n=201, MD -5.51 days, 95% CI -17.64 to 6.62).

### **Prognostic factors for intensive care unit length-of-stay**

One prognostic factor from two studies including 131 STSS patients was eligible for analysis (table 2, supplementary data). We are uncertain if IVIG treatment compared to no IVIG treatment is associated with ICU length-of-stay (n=131, MD 3.80 days, 95% CI -3.62 to 11.23; very low certainty evidence due to very serious risk of bias and serious imprecision).

### **Subgroup and sensitivity analysis**

Sparsity of data precluded our planned subgroup analyses by clindamycin treatment, presence of necrotizing fasciitis and sex (i.e. each subgroup did not have at least two studies). We collapsed the low and moderate risk of bias categories to allow for subgroup analysis by risk of bias (low or moderate vs high). The prognostic factor-outcome combinations for which there was sufficient evidence for subgroup analysis by age or modified risk of bias level were IVIG-mortality and sex-mortality. We found no statistical evidence that the association between IVIG and mortality differed between low or moderate and high risk of bias studies in all STSS patients (p=0.884) and clindamycin-treated STSS patients (p=0.867) or between studies with STSS



1  
2  
3 patients <18 years and patients 18-64 years ( $p=0.328$ ). We also found no statistical evidence that  
4 the association between sex and mortality differed between studies with patients <18 years and  
5 patients 18-64 years ( $p=0.666$ ). Because results were consistent across Peto, and DerSimonian  
6 and Laird methods, our post-hoc sensitivity analysis showed that our meta-analyses based on few  
7 events were robust.  
8  
9  
10  
11  
12

### 13 **Discussion**

14  
15 This systematic review and meta-analysis provides a comprehensive overview of the prognostic  
16 evidence for STSS. Prognostic factors for which there was a statistically significant association  
17 with mortality in STSS patients were age, clindamycin treatment, IVIG treatment and NSAIDs  
18 treatment. Patients  $\geq 65$  years compared to patients 18 to 64 years may have increased odds of  
19 mortality (low certainty of evidence); however we are uncertain if the same is true for patients  
20  $\geq 65$  years compared to patients <18 years (very low certainty of evidence). We are also uncertain  
21 whether NSAIDs increase the odds of mortality (very low certainty of evidence). Low certainty  
22 evidence suggests the odds of mortality may be reduced by treatment with clindamycin and  
23 within clindamycin-treated patients, IVIG. We are highly uncertain whether IVIG reduces  
24 mortality in all STSS patients, regardless of clindamycin treatment (very low certainty of  
25 evidence). Results failed to show a significant association between all other meta-analyzed  
26 prognostic factors and outcomes (table 2). The certainty of STSS prognostic evidence was low or  
27 very low due to serious or very serious risk of bias and imprecision concerns.  
28  
29  
30  
31  
32  
33  
34  
35  
36  
37  
38  
39

40 Strengths of this review include its systematic and explicit search of the literature, capture of a  
41 wide breadth of patient-important outcomes within and outside of critical care and the use of  
42 meta-analysis to increase statistical power in studying relationships between prognostic factors  
43 and outcomes in STSS patients. These strengths directly address limitations of a narrative  
44 synthesis of STSS prognosis restricted to the critical care setting [1].  
45  
46  
47  
48  
49

50 In the absence of large cohort studies and randomized trials, conclusions for STSS prognosis in  
51 this review are limited by very low to low certainty evidence. The majority of included studies  
52 were non-randomized (39/40, 98%) and small (median sample size was 10 patients), introducing  
53 bias from residual confounding and imprecision around pooled summary estimates. Small  
54  
55  
56  
57  
58  
59  
60

1  
2  
3 numbers of events further contributed to the imprecision around summary estimates and limited  
4 the interpretation of our findings. With few participants and events, minor changes in the data  
5 can cause major changes in the results. In such instances, results can be exaggerated by the  
6 presentation of relative effect estimates only. To minimize the risk of misinterpreting results  
7 from the inclusion of small studies in our meta-analyses, we calculated an absolute effect  
8 estimate for each relative effect estimate (table 2). Further, despite expecting small studies to be  
9 more heterogeneous than large studies, we did not find statistical evidence of heterogeneity in  
10 any of our 33 meta-analyses and in interpreting the  $I^2$  statistic value, we found not likely  
11 important heterogeneity in all but one meta-analysis [66]. Creation of an international registry of  
12 STSS patients may improve the credibility of prognostic evidence for STSS and facilitate the  
13 conduct of high-quality cohort studies. Although we meta-analyzed adjusted odds ratios from  
14 included studies when possible, almost all included studies reported crude data (38/40, 95%),  
15 precluding adjustment for important confounders. A limitation of the evidence is the lack of  
16 long-term outcome data reported. For example, no studies quantified associations between  
17 prognostic factors and functional status or health related quality of life outcomes post-infection  
18 in STSS survivors. Given the high morbidity associated with STSS [67], future research in STSS  
19 prognosis should quantify these patient-important outcomes, facilitating future meta-analyses  
20 and providing further insights into STSS prognosis.  
21  
22  
23  
24  
25  
26  
27  
28  
29  
30  
31  
32  
33  
34  
35

36 Our finding that IVIG treatment may reduce the odds of mortality in STSS patients who receive  
37 clindamycin treatment is consistent with a systematic review and meta-analysis of IVIG  
38 treatment in clindamycin-treated STSS patients, which found statistical evidence of a decreased  
39 risk of mortality in IVIG- and clindamycin-treated STSS patients when compared to only  
40 clindamycin-treated STSS patients [67]. For this question relevant to clindamycin-treated STSS  
41 patients, our meta-analysis included one additional non-randomized study, whose small sample  
42 size and imprecision contributed to an overall point estimate of greater magnitude [33]. Our  
43 findings suggest that treatment regimens of IVIG in adjunct to clindamycin and clindamycin  
44 alone may significantly improve STSS prognosis. We found a significant association between a  
45 regimen of IVIG regardless of clindamycin treatment and mortality; however, due to very serious  
46 risk of bias and serious imprecision, and thus very low certainty evidence, we cannot rule out the  
47 possibility that clindamycin treatment may be necessary for STSS patients to benefit from IVIG  
48  
49  
50  
51  
52  
53  
54  
55  
56  
57  
58  
59  
60

1  
2  
3 treatment. Further, only one study reported on IVIG treatment in STSS patients that were not  
4 also treated with clindamycin [34]; therefore, our planned subgroup analysis to test if the  
5 beneficial effect of IVIG is modified in the absence of clindamycin was precluded. Based on  
6 very low certainty evidence, our finding that NSAID treatment is significantly associated with  
7 mortality in STSS patients can be explained by clinical and basic science literature, which  
8 suggests nonselective NSAIDs mask early signs and symptoms of GAS infection, such as fever,  
9 subsequently delaying time to antibiotic treatment – a risk factor for severe sepsis and shock, and  
10 mortality [68, 69].  
11  
12  
13  
14  
15  
16  
17

18  
19 After analyzing 30 different prognostic factor and outcome combinations, we found that  
20 clindamycin treatment was significantly associated with an improved STSS prognosis. Further,  
21 we found that IVIG treatment may reduce the odds of mortality in STSS patients who receive  
22 clindamycin treatment, but we are uncertain if this is true for all STSS patients, regardless of  
23 clindamycin treatment. Although these findings support the use of IVIG as an adjunctive  
24 treatment in clindamycin-treated STSS patients, the certainty of evidence was low due to serious  
25 risk of bias and imprecision. Age equal to or older than 65 years and treatment with NSAIDs was  
26 significantly associated with a worse STSS prognosis. Results from very low to low certainty  
27 evidence failed to show a significant association between any other factors of interest and STSS  
28 prognosis.  
29  
30  
31  
32  
33  
34  
35  
36  
37

### 38 **Contributors**

39 All authors attest they meet the ICMJE criteria for authorship. All authors have made substantial  
40 contributions to the following: (1) the conception and design of the study (Jessica J Bartoszko,  
41 Lehana Thabane, Dominik Mertz, Mark Loeb), acquisition of data (Jessica J Bartoszko, Zeyad  
42 Elias, Paulina Rudziak, Carson KL Lo), analysis and interpretation of data (Jessica J Bartoszko,  
43 Zeyad Elias, Paulina Rudziak, Carson KL Lo, Mark Loeb); (2) drafting the article and revising it  
44 critically for important intellectual content (Jessica J Bartoszko, Lehana Thabane, Dominik  
45 Mertz, Mark Loeb), (3) final approval of the version to be submitted (Jessica J Bartoszko, Zeyad  
46 Elias, Paulina Rudziak, Carson KL Lo, Lehana Thabane, Dominik Mertz, Mark Loeb).  
47  
48  
49  
50  
51  
52  
53  
54

### 55 **Declaration of interests**

56  
57  
58  
59  
60

1  
2  
3 Mark Loeb declares grants or contracts from the World Health Organization, consulting fees  
4 from AVIR Pharma, and participating on data safety monitoring or advisory boards for Paladin  
5 Labs and Sunovion Pharmaceuticals.  
6  
7  
8  
9

10 I, the Submitting Author has the right to grant and does grant on behalf of all authors of the  
11 Work (as defined in the below author licence), an exclusive licence and/or a non-exclusive  
12 licence for contributions from authors who are: i) UK Crown employees; ii) where BMJ has  
13 agreed a CC-BY licence shall apply, and/or iii) in accordance with the terms applicable for US  
14 Federal Government officers or employees acting as part of their official duties; on a worldwide,  
15 perpetual, irrevocable, royalty-free basis to BMJ Publishing Group Ltd (“BMJ”) its licensees and  
16 where the relevant Journal is co-owned by BMJ to the co-owners of the Journal, to publish the  
17 Work in BMJ Medicine and any other BMJ products and to exploit all rights, as set out in our  
18 licence.  
19  
20  
21  
22  
23  
24  
25  
26

27 The Submitting Author accepts and understands that any supply made under these terms is made  
28 by BMJ to the Submitting Author unless you are acting as an employee on behalf of your  
29 employer or a postgraduate student of an affiliated institution which is paying any applicable  
30 article publishing charge (“APC”) for Open Access articles. Where the Submitting Author  
31 wishes to make the Work available on an Open Access basis (and intends to pay the relevant  
32 APC), the terms of reuse of such Open Access shall be governed by a Creative Commons licence  
33 – details of these licences and which Creative Commons licence will apply to this Work are set  
34 out in our licence referred to above.  
35  
36  
37  
38  
39  
40  
41  
42

### 43 **Role of the funding source**

44 There was no funding source for this study.  
45  
46  
47

### 48 **Data availability statement**

49 Data extracted from individual studies are available upon reasonable request to the  
50 corresponding author. All other data relevant to the study are included in the article or uploaded  
51 as online supplemental information.  
52  
53  
54  
55  
56  
57  
58  
59  
60

1  
2  
3 **Ethics statement**

4 Patient consent for publication not applicable.  
5  
6  
7

8 **Figure 1. PRISMA study flow diagram.**  
9

10  
11 **Figure 2. Meta-analyses comparing IVIG treatment to no IVIG treatment for the outcome**  
12 **mortality in A) all STSS patients; and B) the subset of STSS patients treated with**  
13 **clindamycin. Please note proportions are blank for study rows where we meta-analyzed**  
14 **adjusted odds ratios instead of crude proportions.**  
15  
16  
17  
18  
19  
20  
21  
22  
23  
24  
25  
26  
27  
28  
29  
30  
31  
32  
33  
34  
35  
36  
37  
38  
39  
40  
41  
42  
43  
44  
45  
46  
47  
48  
49  
50  
51  
52  
53  
54  
55  
56  
57  
58  
59  
60

## References

1. Schmitz, M., et al., *Streptococcal toxic shock syndrome in the intensive care unit*. Annals of intensive care, 2018. **8**(1): p. 88-88.
2. O'Loughlin, R.E., et al., *The epidemiology of invasive group A streptococcal infection and potential vaccine implications: United States, 2000-2004*. Clin Infect Dis, 2007. **45**(7): p. 853-62.
3. Canada, G.o., *Group A Streptococcal diseases: For health professionals*. <https://www.canada.ca/en/public-health/services/diseases/group-a-streptococcal-diseases/health-professionals.html>, 2019.
4. Davies, H.D., et al., *Invasive Group A Streptococcal Infections in Ontario, Canada*. New England Journal of Medicine, 1996. **335**(8): p. 547-554.
5. Adalat, S., et al., *Toxic shock syndrome surveillance in UK children*. Arch Dis Child, 2014. **99**(12): p. 1078-82.
6. Carapetis, J.R., et al., *Effectiveness of clindamycin and intravenous immunoglobulin, and risk of disease in contacts, in invasive group a streptococcal infections*. Clin Infect Dis, 2014. **59**(3): p. 358-65.
7. Darenberg, J., et al., *Intravenous immunoglobulin G therapy in streptococcal toxic shock syndrome: a European randomized, double-blind, placebo-controlled trial*. Clin Infect Dis, 2003. **37**(3): p. 333-40.
8. Kadri, S.S., et al., *Impact of Intravenous Immunoglobulin on Survival in Necrotizing Fasciitis With Vasopressor-Dependent Shock: A Propensity Score-Matched Analysis From 130 US Hospitals*. Clin Infect Dis, 2017. **64**(7): p. 877-885.
9. Kaul, R., et al., *Population-based surveillance for group A streptococcal necrotizing fasciitis: Clinical features, prognostic indicators, and microbiologic analysis of seventy-seven cases. Ontario Group A Streptococcal Study*. Am J Med, 1997. **103**(1): p. 18-24.
10. Kaul, R., et al., *Intravenous immunoglobulin therapy for streptococcal toxic shock syndrome--a comparative observational study. The Canadian Streptococcal Study Group*. Clin Infect Dis, 1999. **28**(4): p. 800-7.
11. Linnér, A., et al., *Clinical efficacy of polyspecific intravenous immunoglobulin therapy in patients with streptococcal toxic shock syndrome: a comparative observational study*. Clin Infect Dis, 2014. **59**(6): p. 851-7.
12. Madsen, M.B., et al., *Immunoglobulin G for patients with necrotising soft tissue infection (INSTINCT): a randomised, blinded, placebo-controlled trial*. Intensive Care Med, 2017. **43**(11): p. 1585-1593.
13. Mehta, S., et al., *Morbidity and mortality of patients with invasive group A streptococcal infections admitted to the ICU*. Chest, 2006. **130**(6): p. 1679-86.
14. Shah, S.S., et al., *Intravenous immunoglobulin in children with streptococcal toxic shock syndrome*. Clin Infect Dis, 2009. **49**(9): p. 1369-76.
15. York., C.f.R.a.D.U.o., *PROSPERO. International prospective register of systematic reviews*. <<http://www.crd.york.ac.uk/PROSPERO/>>. 2017.
16. Jessica Bartoszko, Z.E., Dominik Mertz, Lehana Thabane, Mark Loeb., *Natural History and Prognosis of Streptococcal Toxic Shock Syndrome: Systematic Review and Meta-*

- 1  
2  
3  
4  
5  
6  
7  
8  
9  
10  
11  
12  
13  
14  
15  
16  
17  
18  
19  
20  
21  
22  
23  
24  
25  
26  
27  
28  
29  
30  
31  
32  
33  
34  
35  
36  
37  
38  
39  
40  
41  
42  
43  
44  
45  
46  
47  
48  
49  
50  
51  
52  
53  
54  
55  
56  
57  
58  
59  
60
- Analysis*. Available from:  
[https://www.crd.york.ac.uk/prospero/display\\_record.php?ID=CRD42020166961](https://www.crd.york.ac.uk/prospero/display_record.php?ID=CRD42020166961), 2020.
17. Moher, D., et al., *Preferred reporting items for systematic reviews and meta-analyses: the PRISMA statement*. *BMJ*, 2009. **339**: p. b2535.
  18. Stroup, D.F., et al., *Meta-analysis of observational studies in epidemiology: a proposal for reporting*. *Meta-analysis Of Observational Studies in Epidemiology (MOOSE) group*. *Jama*, 2000. **283**(15): p. 2008-12.
  19. Practice, B.B., *Study design search filters*.  
<https://bestpractice.bmj.com/info/toolkit/learn-ebm/study-design-search-filters/>.
  20. Sterne, J.A.C., et al., *Recommendations for examining and interpreting funnel plot asymmetry in meta-analyses of randomised controlled trials*. *BMJ*, 2011. **343**: p. d4002.
  21. Morrison, A., et al., *The effect of English-language restriction on systematic review-based meta-analyses: a systematic review of empirical studies*. *Int J Technol Assess Health Care*, 2012. **28**(2): p. 138-44.
  22. Moher, D., et al., *What contributions do languages other than English make on the results of meta-analyses?* *J Clin Epidemiol*, 2000. **53**(9): p. 964-72.
  23. Canada, G.o., *National case definition: Invasive group A streptococcal disease*. 2008.
  24. Ouzzani, M., et al., *Rayyan—a web and mobile app for systematic reviews*. *Systematic Reviews*, 2016. **5**(1): p. 210.
  25. Hayden, J.A., et al., *Assessing bias in studies of prognostic factors*. *Ann Intern Med*, 2013. **158**(4): p. 280-6.
  26. Guyatt, G., et al., *GRADE guidelines: 1. Introduction-GRADE evidence profiles and summary of findings tables*. (1878-5921 (Electronic)).
  27. Huguet, A., et al., *Judging the quality of evidence in reviews of prognostic factor research: adapting the GRADE framework*. *Systematic Reviews*, 2013. **2**(1): p. 71.
  28. Viechtbauer, W., *Conducting Meta-Analyses in R with the metafor Package*. *Journal of Statistical Software*; Vol 1, Issue 3 (2010), 2010.
  29. Higgins JP, G.S., *Cochrane handbook for systematic reviews of interventions version 5.1.0 (updated March 2011)*. The Cochrane Collaboration , 2011. [handbook.cochrane.org](http://handbook.cochrane.org), 2011.
  30. Hozo, S.P., B. Djulbegovic, and I. Hozo, *Estimating the mean and variance from the median, range, and the size of a sample*. *BMC Medical Research Methodology*, 2005. **5**(1): p. 13.
  31. Wan, X., et al., *Estimating the sample mean and standard deviation from the sample size, median, range and/or interquartile range*. *BMC Medical Research Methodology*, 2014. **14**(1): p. 135.
  32. Efthimiou, O., *Practical guide to the meta-analysis of rare events*. *Evidence Based Mental Health*, 2018. **21**(2): p. 72.
  33. Barnham, M.R., et al., *Streptococcal toxic shock syndrome: a description of 14 cases from North Yorkshire, UK*. *Clin Microbiol Infect*, 2002. **8**(3): p. 174-81.
  34. Stegmayr, B., et al., *Septic shock induced by group A streptococcal infection: clinical and therapeutic aspects*. *Scand J Infect Dis*, 1992. **24**(5): p. 589-97.
  35. Abuhammour, W., R.A. Hasan, and E. Unuvar, *Group A beta-hemolytic streptococcal bacteremia*. *Indian J Pediatr*, 2004. **71**(10): p. 915-9.

- 1
- 2
- 3
- 4 36. Al-ajmi, J.A., et al., *Group A Streptococcus Toxic Shock Syndrome: An outbreak report and review of the literature*. J Infect Public Health, 2012. **5**(6): p. 388-93.
- 5
- 6 37. Bernaldo de Quirós, J.C., et al., *Group A streptococcal bacteremia. A 10-year prospective study*. Medicine (Baltimore), 1997. **76**(4): p. 238-48.
- 7
- 8 38. Brogan, T.V., et al., *Group A streptococcal necrotizing fasciitis complicating primary varicella: a series of fourteen patients*. Pediatr Infect Dis J, 1995. **14**(7): p. 588-94.
- 9
- 10 39. Butragueño Laiseca, L., et al., *Toxic shock syndrome in a paediatric intensive care unit over the last 15 years*. Anales de Pediatría (English Edition), 2017. **87**(2): p. 111-113.
- 11
- 12 40. Carapetis, J., et al., *Increasing severity of invasive group A streptococcal disease in Australia: clinical and molecular epidemiological features and identification of a new virulent M-nontypeable clone*. Clin Infect Dis, 1995. **21**(5): p. 1220-7.
- 13
- 14 41. Cimolai, N., et al., *Invasive Streptococcus pyogenes infections in children*. Can J Public Health, 1992. **83**(3): p. 230-3.
- 15
- 16 42. Cook, A., et al., *Manifestations of Toxic Shock Syndrome in Children, Columbus, Ohio, USA, 2010-2017(1)*. Emerging infectious diseases, 2020. **26**(6): p. 1077-1083.
- 17
- 18 43. Cowan, M.R., et al., *Serious group A beta-hemolytic streptococcal infections complicating varicella*. Ann Emerg Med, 1994. **23**(4): p. 818-22.
- 19
- 20 44. Crum, N.F., et al., *A case series of group A Streptococcus necrotizing fasciitis in military trainees*. Mil Med, 2004. **169**(5): p. 373-5.
- 21
- 22 45. Dahl, P.R., et al., *Fulminant group A streptococcal necrotizing fasciitis: clinical and pathologic findings in 7 patients*. J Am Acad Dermatol, 2002. **47**(4): p. 489-92.
- 23
- 24 46. Donaldson, P.M., et al., *Rapidly fatal necrotising fasciitis caused by Streptococcus pyogenes*. Journal of clinical pathology, 1993. **46**(7): p. 617-620.
- 25
- 26 47. Erdem, G., et al., *Characterization of a community cluster of group a streptococcal invasive disease in Maui, Hawaii*. The Pediatric infectious disease journal, 2004. **23**(7): p. 677-679.
- 27
- 28 48. Eriksson, B.K., et al., *Invasive group A streptococcal infections: T1M1 isolates expressing pyrogenic exotoxins A and B in combination with selective lack of toxin-neutralizing antibodies are associated with increased risk of streptococcal toxic shock syndrome*. J Infect Dis, 1999. **180**(2): p. 410-8.
- 29
- 30 49. Forni, A.L., et al., *Clinical and microbiological characteristics of severe group A streptococcus infections and streptococcal toxic shock syndrome*. Clin Infect Dis, 1995. **21**(2): p. 333-40.
- 31
- 32 50. Fronhoffs, S., et al., *The effect of C1-esterase inhibitor in definite and suspected streptococcal toxic shock syndrome. Report of seven patients*. Intensive Care Med, 2000. **26**(10): p. 1566-70.
- 33
- 34 51. Hasegawa, T., et al., *Factors determining prognosis in streptococcal toxic shock-like syndrome: results of a nationwide investigation in Japan*. Microbes Infect, 2004. **6**(12): p. 1073-7.
- 35
- 36 52. Hayata, E., et al., *Nationwide study of mortality and survival in pregnancy-related streptococcal toxic shock syndrome*. The journal of obstetrics and gynaecology research, 2021. **47**(3): p. 928-934.
- 37
- 38
- 39
- 40
- 41
- 42
- 43
- 44
- 45
- 46
- 47
- 48
- 49
- 50
- 51
- 52
- 53
- 54
- 55
- 56
- 57
- 58
- 59
- 60



- 1
- 2
- 3
- 4 53. Huang, Y.C., et al., *A family cluster of streptococcal toxic shock syndrome in children: clinical implication and epidemiological investigation*. Pediatrics, 2001. **107**(5): p. 1181-3.
- 5
- 6
- 7 54. Kansal, R.G., et al., *Inverse relation between disease severity and expression of the streptococcal cysteine protease, SpeB, among clonal MIT1 isolates recovered from invasive group A streptococcal infection cases*. Infect Immun, 2000. **68**(11): p. 6362-9.
- 8
- 9
- 10 55. Linder, K.A., et al., *Effect of underlying immune compromise on the manifestations and outcomes of group A streptococcal bacteremia*. J Infect, 2017. **74**(5): p. 450-455.
- 11
- 12 56. Luca-Harari, B., et al., *Clinical and microbiological characteristics of severe Streptococcus pyogenes disease in Europe*. J Clin Microbiol, 2009. **47**(4): p. 1155-65.
- 13
- 14 57. Nelson, G.E., et al., *Epidemiology of Invasive Group A Streptococcal Infections in the United States, 2005-2012*. Clin Infect Dis, 2016. **63**(4): p. 478-86.
- 15
- 16 58. Safar, A., et al., *Invasive Group A Streptococcal Infection and Vaccine Implications, Auckland, New Zealand*. Emerging Infectious Diseases, 2011. **17**(6): p. 983-989.
- 17
- 18 59. Schwartz, B., et al., *Clusters of invasive group A streptococcal infections in family, hospital, and nursing home settings*. Clin Infect Dis, 1992. **15**(2): p. 277-84.
- 19
- 20 60. Sriskandan, S. and J. Cohen, *Kallikrein-kinin system activation in streptococcal toxic shock syndrome*. Clin Infect Dis, 2000. **30**(6): p. 961-2.
- 21
- 22 61. Stockmann, C., et al., *Evolving epidemiologic characteristics of invasive group A streptococcal disease in Utah, 2002-2010*. Clin Infect Dis, 2012. **55**(4): p. 479-87.
- 23
- 24 62. Tagini, F., et al., *Importance of whole genome sequencing for the assessment of outbreaks in diagnostic laboratories: analysis of a case series of invasive Streptococcus pyogenes infections*. Eur J Clin Microbiol Infect Dis, 2017. **36**(7): p. 1173-1180.
- 25
- 26 63. Zachariadou, L., et al., *Differences in the epidemiology between paediatric and adult invasive Streptococcus pyogenes infections*. Epidemiol Infect, 2014. **142**(3): p. 512-9.
- 27
- 28 64. Stevens, D.L., et al., *Severe group A streptococcal infections associated with a toxic shock-like syndrome and scarlet fever toxin A*. N Engl J Med, 1989. **321**(1): p. 1-7.
- 29
- 30 65. Page, A.V., et al., *Systemic dysregulation of angiopoietin-1/2 in streptococcal toxic shock syndrome*. Clin Infect Dis, 2011. **52**(8): p. e157-61.
- 31
- 32 66. IntHout, J., et al., *Small studies are more heterogeneous than large ones: a meta-meta-analysis*. Journal of Clinical Epidemiology, 2015. **68**(8): p. 860-869.
- 33
- 34 67. Parks, T., et al., *Polyspecific Intravenous Immunoglobulin in Clindamycin-treated Patients With Streptococcal Toxic Shock Syndrome: A Systematic Review and Meta-analysis*. Clinical infectious diseases : an official publication of the Infectious Diseases Society of America, 2018. **67**(9): p. 1434-1436.
- 35
- 36 68. Legras, A., et al., *A multicentre case-control study of nonsteroidal anti-inflammatory drugs as a risk factor for severe sepsis and septic shock*. Critical Care, 2009. **13**(2): p. R43.
- 37
- 38 69. Bryant, A.E., et al., *The roles of injury and nonsteroidal anti-inflammatory drugs in the development and outcomes of severe group A streptococcal soft tissue infections*. Current Opinion in Infectious Diseases, 2015. **28**(3).
- 39
- 40
- 41
- 42
- 43
- 44
- 45
- 46
- 47
- 48
- 49
- 50
- 51
- 52
- 53
- 54
- 55
- 56
- 57
- 58
- 59
- 60

1  
2  
3  
4  
5  
6  
7  
8 **Figure 1. PRISMA flow diagram.**  
9

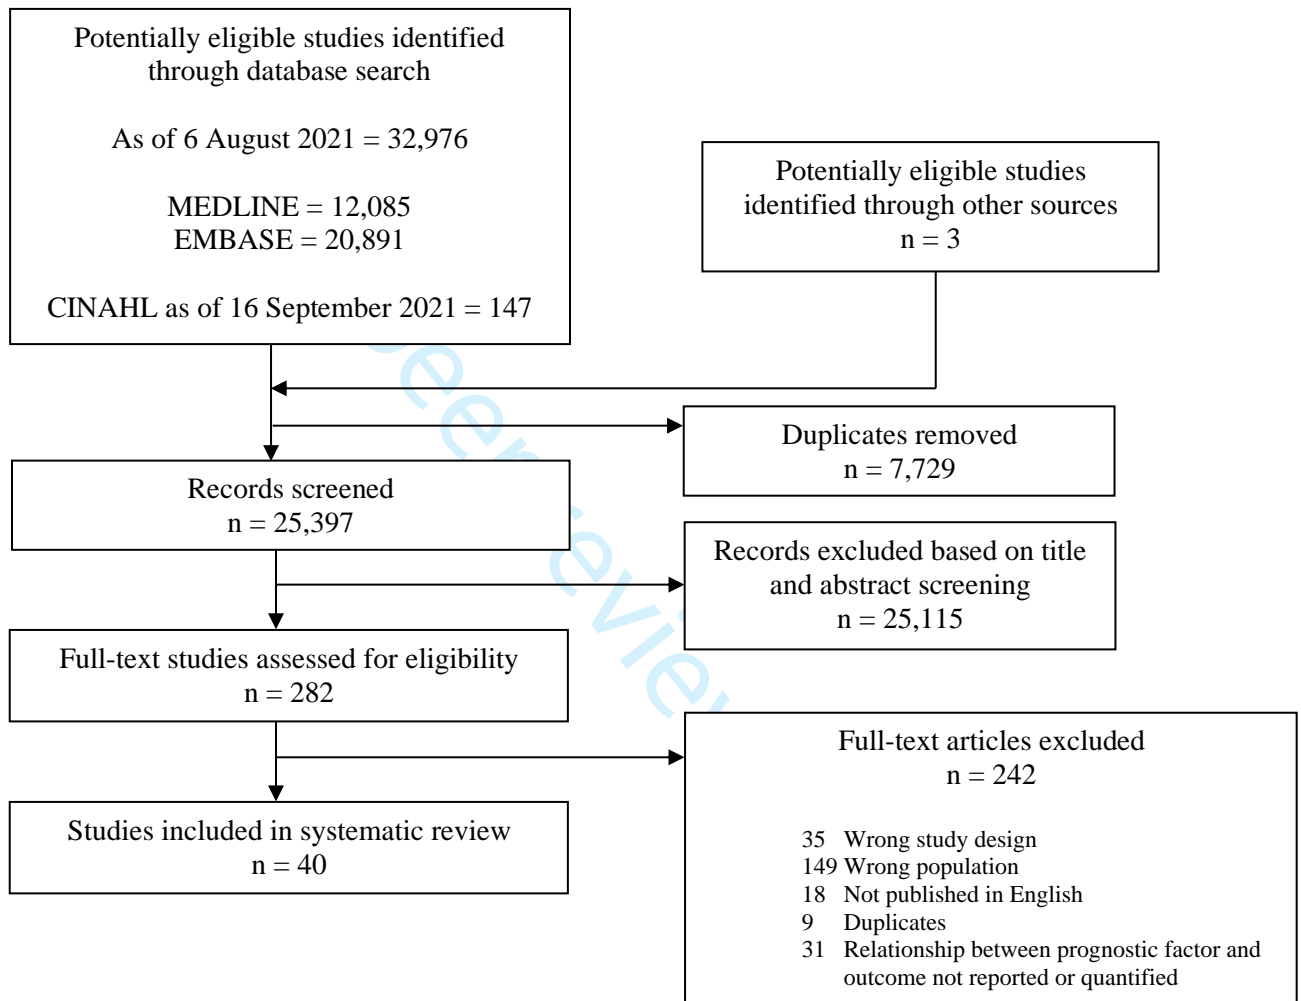

**Figure 2. Meta-analyses comparing IVIG treatment to no IVIG treatment for the outcome mortality in A) all STSS patients; and B) the subset of STSS patients treated with clindamycin. Please note proportions are blank for study rows where we meta-analyzed adjusted odds ratios instead of crude proportions.**

**A)**

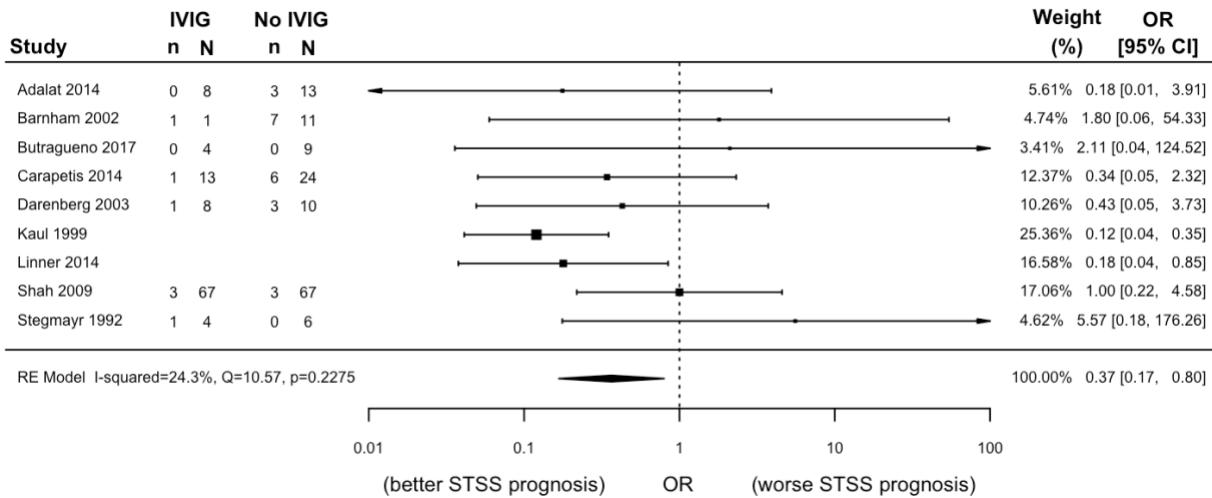

**B)**

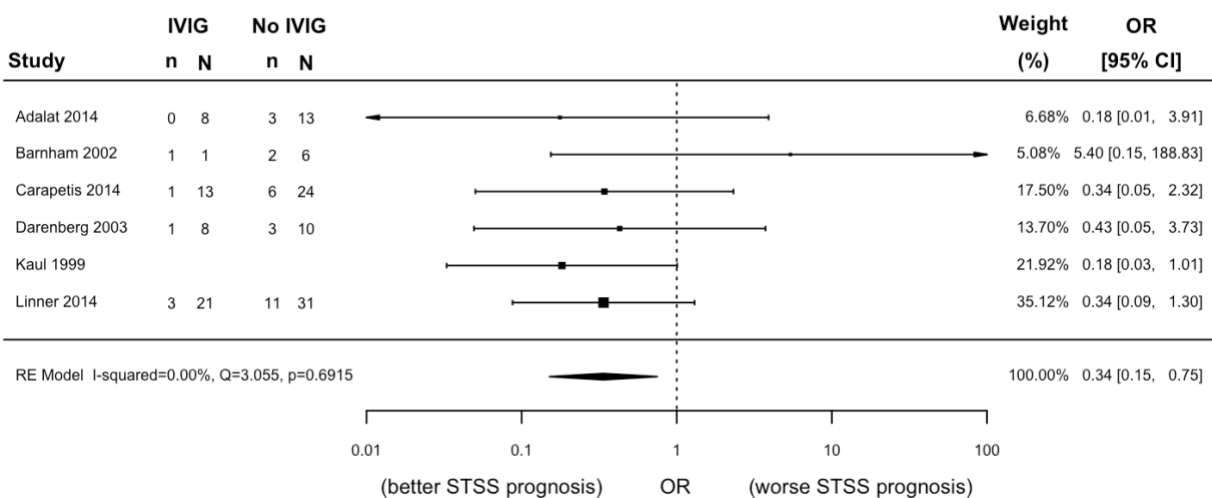

# PROGNOSTIC FACTORS FOR STREPTOCOCCAL TOXIC SHOCK SYNDROME: SYSTEMATIC REVIEW AND META-ANALYSIS

## Supplementary Material

| <b>Table of contents</b>                                       | <b>Page</b> |
|----------------------------------------------------------------|-------------|
| Search strategy                                                | 2           |
| GRADE assessment guidance                                      | 4           |
| Description of studies excluded at full text stage             | 6           |
| Additional study characteristics                               | 18          |
| Risk of bias assessment                                        | 25          |
| Forest plots for pairwise meta-analyses                        | 27          |
| Description of studies ineligible for meta-analysis by outcome | 42          |

## Search strategies

1) Database: OVID Medline Epub Ahead of Print, In-Process & Other Non-Indexed Citations, Ovid MEDLINE(R) Daily and Ovid MEDLINE(R) 1946 to Present

Search Strategy:

-----

- 1 toxic shock syndrome.mp. or exp Shock, Septic/ or STSS.mp. or streptococcal toxic shock syndrome.mp. or necrotizing fasciitis.mp. or exp Fasciitis, Necrotizing/ or septic shock.mp.
- 2 (group a streptococc\* or group A streptococc\* or pyogenes or streptococcus pyogenes).mp. or exp Streptococcus pyogenes/
- 3 exp Cohort Studies/
- 4 cohort\$.tw.
- 5 controlled clinical trial.pt.
- 6 epidemiologic methods/
- 7 limit 6 to yr=1966-1989
- 8 exp case-control studies/
- 9 (case\$ and control\$).tw.
- 10 (case\$ and series).tw.
- 11 or/3-5,7-10
- 12 randomized controlled trial.pt.
- 13 (random\$ or placebo\$ or single blind\$ or double blind\$ or triple blind\$).ti,ab.
- 14 (retraction of publication or retracted publication).pt.
- 15 or/12-14
- 16 (animals not humans).sh.
- 17 ((comment or editorial or meta-analysis or practice-guideline or review or letter) not randomized controlled trial).pt.
- 18 (random sampl\$ or random digit\$ or random effect\$ or random survey or random regression).ti,ab. not randomized controlled trial.pt.
- 19 15 not (16 or 17 or 18)
- 20 animals/ not humans/
- 21 (1 or 2) and (11 or 19)
- 22 21 not 20

2) Database: Embase <1974 to 2020 February 03>

Search Strategy:

-----

- 1 toxic shock syndrome.mp. or exp septic shock/ or STSS.mp. or streptococcal toxic shock syndrome.mp. or necrotizing fasciitis.mp. or exp necrotizing fasciitis/ or septic shock.mp. or exp toxic shock syndrome/
- 2 (group a streptococc\* or group A streptococc\* or pyogenes or streptococcus pyogenes).mp. or exp Streptococcus pyogenes/ or exp Streptococcus group A/
- 3 exp cohort analysis/
- 4 exp longitudinal study/
- 5 exp prospective study/

1  
2  
3 6 exp follow up/  
4 7 cohort\$.tw.  
5 8 exp case control study/ or (case\$ and control\$).tw.  
6 9 exp case study/ or (case\$ and series).tw.  
7 10 or/3-9  
8 11 (random\$ or placebo\$ or single blind\$ or double blind\$ or triple blind\$).ti,ab.  
9 12 RETRACTED ARTICLE/  
10 13 or/11-12  
11 14 (animal\$ not human\$).sh,hw.  
12 15 (book or conference paper or editorial or letter or review).pt. not exp randomized controlled  
13 trial/  
14 16 (random sampl\$ or random digit\$ or random effect\$ or random survey or random  
15 regression).ti,ab. not exp randomized controlled trial/  
16 17 13 not (14 or 15 or 16)  
17 18 exp animal/  
18 19 exp human/  
19 20 18 not 19  
20 21 (1 or 2) and (10 or 17)  
21 22 21 not 20  
22  
23  
24  
25  
26  
27  
28  
29  
30  
31  
32  
33  
34  
35  
36  
37  
38  
39  
40  
41  
42  
43  
44  
45  
46  
47  
48  
49  
50  
51  
52  
53  
54  
55  
56  
57  
58  
59  
60

## GRADE assessment guidance

Based on GRADE guidance for prognostic studies, we start with high certainty evidence for each meta-analysis.

### Risk of bias

For each meta-analysis, we downgraded the certainty of the evidence once for risk of bias when studies with moderate or high risk of bias contributed >50% weight to the pooled effect estimates or when studies providing unadjusted estimates contributed >50% weight to the pooled effect estimate (i.e. serious risk of bias). We downgraded the certainty of the evidence twice for risk of bias when studies with moderate or high risk of bias contributed >80% weight to the pooled effect estimates or when studies providing unadjusted estimates contributed >80% weight to the pooled effect estimate (i.e. very serious risk of bias).

### Inconsistency

We used visual inspection of the forest plots and the  $I^2$  statistic to assess inconsistency. For visual inspection of the forest plots, we considered the variability in point estimates and confidence interval overlap in relation to the null effect. Further, we downgraded the certainty of the evidence once when there was substantial ( $I^2$  50-90%) heterogeneity and twice when there was considerable ( $I^2$  75-100%) heterogeneity.

### Imprecision

We downgraded the certainty of the evidence once for imprecision if:

- 1) The effect on the patient, or clinical action, would differ depending on whether the upper or the lower boundary of the confidence interval represented the truth, **OR**
- 2) The 95% CI of the pooled absolute estimate crossed the null effect by less than 50 people per 1000 on one or both sides, **OR**
- 3) In cases where we had large effects that did not cross the null, we assessed the optimal information size. If the ratio of the upper to the lower limit of the confidence interval of the relative estimate was >3, the optimal information size would never be met; thus, we rated down once for imprecision, **OR**
- 4) There were fewer than 10 outcome events for each prognostic variable (for dichotomous outcomes, **OR**
- 5) There were fewer than 100 cases reaching endpoint (for continuous outcomes).

We downgraded the certainty of the evidence twice for imprecision if:

- 1) The 95% CI of the pooled absolute estimate crossed the null effect by more than 50 people per 1000 on both sides.

### Indirectness

We rated down once if the study sample, the prognostic factor, and/or the outcome in the primary studies did not accurately reflect the review question.

### Publication bias

We rated down once if:

- 1) Small studies reported higher rates compared to large studies, suggesting the selective publication of “positive” studies, **OR**

1  
2  
3 2) The value of the risk/protective factor in predicting the outcome has NOT been repetitively  
4 investigated (e.g. only exploratory studies with no external validation, replication or  
5 confirmation exist).  
6

## 7 8 **References**

- 9 1. Guyatt GH, Oxman AD, Kunz R, et al. GRADE Guidelines 6. Rating the Quality of  
10 Evidence—Imprecision. *J Clin Epidemiol* 2011; 64(12): 1283–93.  
11 <https://doi.org/10.1016/j.jclinepi.2011.01.012>
- 12 2. Hugué A, Hayden JA, Stinson J, et al. Judging the quality of evidence in reviews of  
13 prognostic factor research: adapting the GRADE framework. *Syst Rev.* 2013;2:71.  
14 Published 2013 Sep 5. doi:10.1186/2046-4053-2-71  
15  
16  
17  
18  
19  
20  
21  
22  
23  
24  
25  
26  
27  
28  
29  
30  
31  
32  
33  
34  
35  
36  
37  
38  
39  
40  
41  
42  
43  
44  
45  
46  
47  
48  
49  
50  
51  
52  
53  
54  
55  
56  
57  
58  
59  
60



### Table of excluded full texts (n=242)

| Author, Year     | Title                                                                                                                                                               | Reason for Exclusion |
|------------------|---------------------------------------------------------------------------------------------------------------------------------------------------------------------|----------------------|
| Hamilton, 2013   | Pregnancy-related group a streptococcal infections: Temporal relationships between bacterial acquisition, infection onset, clinical findings, and outcome           | Wrong study design   |
| Ichiyama, 1997   | Transmission of Streptococcus pyogenes causing toxic shock-like syndrome among family members and confirmation by DNA macrorestriction analysis                     | Wrong study design   |
| Idubor, 2019     | Invasive group a streptococcus infections among residents of multiple nursing Homes-Denver, Colorado, 2017-2018                                                     | Wrong study design   |
| Ikebe, 2015      | Increased prevalence of group A streptococcus isolates in streptococcal toxic shock syndrome cases in Japan from 2010 to 2012                                       | Wrong study design   |
| Klinker, 1997    | Toxic shock syndrome in AIDS                                                                                                                                        | Wrong study design   |
| Langmuir, 1982   | Toxic-shock syndrome--an epidemiologist's view                                                                                                                      | Wrong study design   |
| McIvor, 1982     | Treatment of recurrent toxic shock syndrome with oral contraceptive agents                                                                                          | Wrong study design   |
| Pathi, 2013      | Prompt recognition and multidisciplinary approach in Group A streptococcal sepsis                                                                                   | Wrong study design   |
| Shah, 2015       | Role of intravenous immune globulin in streptococcal toxic shock syndrome and Clostridium difficile infection                                                       | Wrong study design   |
| Stallones, 1982  | A review of the epidemiologic studies of toxic shock syndrome                                                                                                       | Wrong study design   |
| Stevens, 2000    | Molecular epidemiology of nga and NAD glycohydrolase/ADP-ribosyltransferase activity among Streptococcus pyogenes causing streptococcal toxic shock syndrome        | Wrong study design   |
| Turner, 2015     | Emergence of a New Highly Successful Acapsular Group A Streptococcus Clade of Genotype emm89 in the United Kingdom                                                  | Wrong study design   |
| Udagawa, 1999    | Serious group A streptococcal infection around delivery                                                                                                             | Wrong study design   |
| Valiquette, 2006 | A survey of physician's attitudes regarding management of severe group A streptococcal infections                                                                   | Wrong study design   |
| Valiquette, 2009 | Assessing the impact of intravenous immunoglobulin in the management of streptococcal toxic shock syndrome: a noble but difficult quest                             | Wrong study design   |
| Wozniak, 2012    | M-protein gene-type distribution and hyaluronic acid capsule in group A Streptococcus clinical isolates in Chile: Association of emm gene markers with csrR alleles | Wrong study design   |
| Anonymous, 1984  | Diagnostic bias and toxic shock syndrome                                                                                                                            | Wrong study design   |
| Blonde, 2017     | A prospective multicentric study of severe cutaneous infections in pediatric intensive care: The SCIPIC cohort                                                      | Wrong study design   |
| Busowski, 2010   | Puerperal group A streptococci (GAS) infection: Reemergence of a dreaded disease - A case series                                                                    | Wrong study design   |
| Cimolai, 2002    | Nonhemolytic Streptococcus pyogenes causing invasive infection                                                                                                      | Wrong study design   |
| Clark, 2010      | Puerperal group a streptococcal sepsis and proinflammatory immune response                                                                                          | Wrong study design   |

|    |                       |                                                                                                                                                                                              |                    |
|----|-----------------------|----------------------------------------------------------------------------------------------------------------------------------------------------------------------------------------------|--------------------|
| 1  |                       |                                                                                                                                                                                              |                    |
| 2  |                       |                                                                                                                                                                                              |                    |
| 3  |                       |                                                                                                                                                                                              |                    |
| 4  | Dahdi, 2018           | Necrotizing soft tissue infection: Microbiological distribution from district region                                                                                                         | Wrong study design |
| 5  |                       |                                                                                                                                                                                              |                    |
| 6  | Das, 2012             | Necrotizing fasciitis in New Zealand - Risk factors, microbiological findings and outcomes in a large case series                                                                            | Wrong study design |
| 7  |                       |                                                                                                                                                                                              |                    |
| 8  | De Zoysa, 2013        | Invasive group A streptococcal disease in the UK, 2008-2012 and molecular characterisation of isolates during enhanced surveillance                                                          | Wrong study design |
| 9  |                       |                                                                                                                                                                                              |                    |
| 10 |                       |                                                                                                                                                                                              |                    |
| 11 | Donawa, 1984          | Toxic shock syndrome: chronology of state and federal epidemiologic studies and regulatory decision-making                                                                                   | Wrong study design |
| 12 |                       |                                                                                                                                                                                              |                    |
| 13 | Figueira, 2013        | Peri-ocular necrotising fasciitis: A multicentre retrospective australian series                                                                                                             | Wrong study design |
| 14 |                       |                                                                                                                                                                                              |                    |
| 15 | Gaensbauer, 2016      | Importance of toxic shock syndrome in pediatric septic shock clinical decision-making                                                                                                        | Wrong study design |
| 16 |                       |                                                                                                                                                                                              |                    |
| 17 | Goldberg, 2015        | Group A beta streptococcal infections in children after oral or dental trauma: A case series of 5 patients                                                                                   | Wrong study design |
| 18 |                       |                                                                                                                                                                                              |                    |
| 19 | McViety, 2014         | Don't forget IGAS: Lessons learnt from review of 2 peak seasons in the north west and North Wales, UK                                                                                        | Wrong study design |
| 20 |                       |                                                                                                                                                                                              |                    |
| 21 | Zangara, 2019         | Epidemiology, outcomes from treatment, and the spectrum of soft tissue infections over time in hospitalized patients: A populationbased description of inpatients in the state of california | Wrong study design |
| 22 |                       |                                                                                                                                                                                              |                    |
| 23 | Arias-Constanti, 2018 | Invasive disease by Streptococcus pyogenes: patients hospitalized for 6 years                                                                                                                | Wrong population   |
| 24 |                       |                                                                                                                                                                                              |                    |
| 25 | Hankins, 2008         | Factors that affect the clinical course of group A beta-haemolytic streptococcal infections of the hand and upper extremity: a retrospective study                                           | Wrong population   |
| 26 |                       |                                                                                                                                                                                              |                    |
| 27 | Henrichsen, 1997      | Invasive infections caused by Streptococcus pyogenes in Denmark 1990- 1994                                                                                                                   | Wrong population   |
| 28 |                       |                                                                                                                                                                                              |                    |
| 29 | Hoge, 1993            | The changing epidemiology of invasive group A streptococcal infections and the emergence of streptococcal toxic shock-like syndrome. A retrospective population-based study                  | Wrong population   |
| 30 |                       |                                                                                                                                                                                              |                    |
| 31 | Jauregui, 2015        | Life- and limb-threatening infections following the use of an external fixator                                                                                                               | Wrong population   |
| 32 |                       |                                                                                                                                                                                              |                    |
| 33 | Kadri, 2017           | Impact of Intravenous Immunoglobulin on Survival in Necrotizing Fasciitis With Vasopressor-Dependent Shock: A Propensity Score-Matched Analysis From 130 US Hospitals                        | Wrong population   |
| 34 |                       |                                                                                                                                                                                              |                    |
| 35 | Leggiadro, 1993       | Group A streptococcal bacteremia in a mid-south children's hospital                                                                                                                          | Wrong population   |
| 36 |                       |                                                                                                                                                                                              |                    |
| 37 | Madsen, 2019          | Patient's characteristics and outcomes in necrotising soft-tissue infections: results from a Scandinavian, multicentre, prospective cohort study                                             | Wrong population   |
| 38 |                       |                                                                                                                                                                                              |                    |
| 39 | Mitchell, 2011        | A strep in the wrong direction-invasive group a streptococcal disease                                                                                                                        | Wrong population   |
| 40 |                       |                                                                                                                                                                                              |                    |
| 41 | Moses, 1995           | Group A streptococcus bacteremia at the Hadassah Medical Center in Jerusalem                                                                                                                 | Wrong population   |
| 42 |                       |                                                                                                                                                                                              |                    |
| 43 | Mosites, 2017         | Use of single-dose azithromycin to control a community outbreak of EMM26.3 group a streptococcus invasive disease-Alaska, 2017                                                               | Wrong population   |
| 44 |                       |                                                                                                                                                                                              |                    |
| 45 | Mosites, 2019         | Risk for invasive streptococcal infections among adults experiencing homelessness, anchorage, Alaska, USA, 2002-2015                                                                         | Wrong population   |
| 46 |                       |                                                                                                                                                                                              |                    |
| 47 |                       |                                                                                                                                                                                              |                    |
| 48 |                       |                                                                                                                                                                                              |                    |
| 49 |                       |                                                                                                                                                                                              |                    |
| 50 |                       |                                                                                                                                                                                              |                    |
| 51 |                       |                                                                                                                                                                                              |                    |
| 52 |                       |                                                                                                                                                                                              |                    |
| 53 |                       |                                                                                                                                                                                              |                    |
| 54 |                       |                                                                                                                                                                                              |                    |
| 55 |                       |                                                                                                                                                                                              |                    |
| 56 |                       |                                                                                                                                                                                              |                    |
| 57 |                       |                                                                                                                                                                                              |                    |
| 58 |                       |                                                                                                                                                                                              |                    |
| 59 |                       |                                                                                                                                                                                              |                    |
| 60 |                       |                                                                                                                                                                                              |                    |

|    |                |                                                                                                                                                                            |
|----|----------------|----------------------------------------------------------------------------------------------------------------------------------------------------------------------------|
| 1  |                |                                                                                                                                                                            |
| 2  |                |                                                                                                                                                                            |
| 3  |                |                                                                                                                                                                            |
| 4  | Mulla, 2007    | Clinical and epidemiologic features of invasive group A streptococcal infections in children                                                                               |
| 5  |                | Wrong population                                                                                                                                                           |
| 6  | Mulla, 2003    | Invasive group A streptococcal infections in Florida                                                                                                                       |
| 7  |                | Wrong population                                                                                                                                                           |
| 8  | Navarro, 1993  | A comparison of Streptococcus pyogenes (group A streptococcal) bacteremia at an urban and a suburban hospital. The importance of intravenous drug use                      |
| 9  |                | Wrong population                                                                                                                                                           |
| 10 | Norton, 2004   | Invasive group A streptococcal disease in North Queensland (1996 - 2001)                                                                                                   |
| 11 |                | Wrong population                                                                                                                                                           |
| 12 | Nuwayhid, 2007 | Blunt Trauma as a Risk Factor for Group A Streptococcal Necrotizing Fasciitis                                                                                              |
| 13 |                | Wrong population                                                                                                                                                           |
| 14 | Oliver, 2019   | Invasive group A Streptococcus disease in Australian children: 2016 to 2018 - a descriptive cohort study                                                                   |
| 15 |                | Wrong population                                                                                                                                                           |
| 16 | Oliver, 2019   | Recent trends in invasive group A Streptococcus disease in Victoria                                                                                                        |
| 17 |                | Wrong population                                                                                                                                                           |
| 18 | Peterson, 1996 | Risk factors for invasive group A streptococcal infections in children with varicella: A case-control study                                                                |
| 19 |                | Wrong population                                                                                                                                                           |
| 20 | Rainbow, 2008  | Invasive group A streptococcal disease in nursing homes, Minnesota, 1995-2006                                                                                              |
| 21 |                | Wrong population                                                                                                                                                           |
| 22 | Rathore, 1992  | Suppurative group A beta-hemolytic streptococcal infections in children                                                                                                    |
| 23 |                | Wrong population                                                                                                                                                           |
| 24 | Reingold, 1984 | Epidemiology of toxic-shock syndrome, United States, 1960-1984                                                                                                             |
| 25 |                | Wrong population                                                                                                                                                           |
| 26 | Reingold, 1989 | Risk factors for menstrual toxic shock syndrome: results of a multistate case-control study                                                                                |
| 27 |                | Wrong population                                                                                                                                                           |
| 28 | Remy, 2019     | Septic shock and toxic shock syndrome-two infectious shocks with different immune response                                                                                 |
| 29 |                | Wrong population                                                                                                                                                           |
| 30 | Rudolph, 2016  | Epidemiology of invasive group a streptococcal disease in Alaska, 2001 to 2013                                                                                             |
| 31 |                | Wrong population                                                                                                                                                           |
| 32 | Saldana, 2010  | Periorbital necrotizing fasciitis: Outcomes using a CT-guided surgical debridement approach                                                                                |
| 33 |                | Wrong population                                                                                                                                                           |
| 34 | Sarangi, 1995  | A nursing home outbreak of group A streptococcal infection: case control study of environmental contamination                                                              |
| 35 |                | Wrong population                                                                                                                                                           |
| 36 | Scaber, 2011   | Group a streptococcal infections during the seasonal influenza outbreak 2010/11 in South East England                                                                      |
| 37 |                | Wrong population                                                                                                                                                           |
| 38 | Scheuer, 2018  | Rising high rate of invasive group a streptococcus infections among persons experiencing homelessness in San Francisco, 2010-2017                                          |
| 39 |                | Wrong population                                                                                                                                                           |
| 40 | Schlech, 1982  | Risk factors for development of toxic shock syndrome. Association with a tampon brand                                                                                      |
| 41 |                | Wrong population                                                                                                                                                           |
| 42 | Schwartz, 1989 | Nonmenstrual toxic shock syndrome associated with barrier contraceptives: report of a case-control study                                                                   |
| 43 |                | Wrong population                                                                                                                                                           |
| 44 | Shands, 1982   | Toxic shock syndrome: Case-control studies at the centers for disease control                                                                                              |
| 45 |                | Wrong population                                                                                                                                                           |
| 46 | Sharma, 2019   | Real-time whole genome sequencing to control a Streptococcus pyogenes outbreak at a national orthopaedic hospital                                                          |
| 47 |                | Wrong population                                                                                                                                                           |
| 48 | Sierra, 2006   | Group A streptococcal infections in injection drug users in Barcelona, Spain: Epidemiologic, clinical, and microbiologic analysis of 3 clusters of cases from 2000 to 2003 |
| 49 |                | Wrong population                                                                                                                                                           |
| 50 |                |                                                                                                                                                                            |
| 51 |                |                                                                                                                                                                            |
| 52 |                |                                                                                                                                                                            |
| 53 |                |                                                                                                                                                                            |
| 54 |                |                                                                                                                                                                            |
| 55 |                |                                                                                                                                                                            |
| 56 |                |                                                                                                                                                                            |
| 57 |                |                                                                                                                                                                            |
| 58 |                |                                                                                                                                                                            |
| 59 |                |                                                                                                                                                                            |
| 60 |                |                                                                                                                                                                            |

|                        |                                                                                                                                                                                             |                  |
|------------------------|---------------------------------------------------------------------------------------------------------------------------------------------------------------------------------------------|------------------|
| Simonart, 2004         | The importance of serum creatine phosphokinase level in the early diagnosis and microbiological evaluation of necrotizing fasciitis                                                         | Wrong population |
| Smith, 2003            | Mass antibiotic treatment for group A streptococcus outbreaks in two long-term care facilities                                                                                              | Wrong population |
| Spargen, 2011          | Proinflammatory immune response and puerperal group a streptococcal sepsis                                                                                                                  | Wrong population |
| Steer, 2009            | Prospective surveillance of invasive group A streptococcal disease, fiji, 2005-2007                                                                                                         | Wrong population |
| Steer, 2008            | High burden of invasive beta-haemolytic streptococcal infections in Fiji                                                                                                                    | Wrong population |
| Tanna, 2006            | Molecular characterization of clinical isolates of M non-typable group A streptococci from invasive disease cases                                                                           | Wrong population |
| Tapiainen, 2016        | Invasive Group A Streptococcal Infections in Children: A Nationwide Survey in Finland                                                                                                       | Wrong population |
| Thanert, 2019          | Molecular profiling of tissue biopsies reveals unique signatures associated with streptococcal necrotizing soft tissue infections                                                           | Wrong population |
| Theis, 2002            | Severe necrotising soft tissue infections in orthopaedic surgery                                                                                                                            | Wrong population |
| Thigpen, 2007          | Nursing home outbreak of invasive group A streptococcal infections caused by 2 distinct strains                                                                                             | Wrong population |
| Urbina, 2019           | Early identification of patients at high risk of group A streptococcus-associated necrotizing skin and soft tissue infections: a retrospective cohort study                                 | Wrong population |
| Vasant, 2019           | Mass prophylaxis in an outbreak of invasive group A streptococcal disease in a residential aged care facility                                                                               | Wrong population |
| Vlaminckx, 2005        | Long-term surveillance of invasive group A streptococcal disease in The Netherlands, 1994-2003                                                                                              | Wrong population |
| Vugia, 1996            | Invasive group A streptococcal infections in children with varicella in Southern California                                                                                                 | Wrong population |
| Waldhausen, 1996       | Surgical implications of necrotizing fasciitis in children with chickenpox                                                                                                                  | Wrong population |
| Watanabe-Ohnishi, 1995 | Selective depletion of V beta-bearing T cells in patients with severe invasive group A streptococcal infections and streptococcal toxic shock syndrome. Ontario Streptococcal Study Project | Wrong population |
| Wheeler, 1991          | Outbreak of group A streptococcus septicemia in children: Clinical, epidemiologic, and microbiological correlates                                                                           | Wrong population |
| Wilson, 1995           | Group A streptococcal necrotizing fasciitis following varicella in children: Case reports and review                                                                                        | Wrong population |
| Wong, 2019             | A Cluster of Pediatric Invasive Group A Streptococcus Disease in Melbourne, Australia, Coinciding with a High-Burden Influenza Season                                                       | Wrong population |
| Yagupsky, 1987         | Group A beta-hemolytic streptococcal bacteremia in children                                                                                                                                 | Wrong population |
| Zerr, 1999             | A case-control study of necrotizing fasciitis during primary varicella                                                                                                                      | Wrong population |
| Zimbelman, 1999        | Improved outcome of clindamycin compared with beta-lactam antibiotic treatment for invasive Streptococcus pyogenes infection                                                                | Wrong population |

|    |                      |                                                                                                                                                                                      |                  |
|----|----------------------|--------------------------------------------------------------------------------------------------------------------------------------------------------------------------------------|------------------|
| 1  |                      |                                                                                                                                                                                      |                  |
| 2  |                      |                                                                                                                                                                                      |                  |
| 3  |                      |                                                                                                                                                                                      |                  |
| 4  |                      | Distribution of emm types of beta hemolytic streptococci associated with necrotizing fasciitis: Clinical profile and outcome                                                         |                  |
| 5  | Abraham, 2016        |                                                                                                                                                                                      | Wrong population |
| 6  |                      | Severe Maternal Sepsis in the UK, 2011-2012: A National Case-Control Study                                                                                                           |                  |
| 7  | Acosta, 2014         |                                                                                                                                                                                      | Wrong population |
| 8  |                      | Investigation into an outbreak of invasive Group A Streptococcal (iGAS) infection at a general hospital in 2010                                                                      |                  |
| 9  | Adams, 2010          |                                                                                                                                                                                      | Wrong population |
| 10 |                      | Identification of invasive streptococcal disease in a pediatric and infant death Cohort-Iowa, 2007-2008                                                                              |                  |
| 11 | Adem, 2009           |                                                                                                                                                                                      | Wrong population |
| 12 |                      | Acute necrotizing fasciitis in Egyptian patients: A case series                                                                                                                      |                  |
| 13 | Afifi, 2008          |                                                                                                                                                                                      | Wrong population |
| 14 |                      | Group A Streptococcal bacteraemia. Experience at King Fahad Medical City in Riyadh, Saudi Arabia                                                                                     |                  |
| 15 | Al-Khadidi, 2017     |                                                                                                                                                                                      | Wrong population |
| 16 |                      | Necrotising fasciitis: A series of seven cases                                                                                                                                       |                  |
| 17 | Alva, 2013           |                                                                                                                                                                                      | Wrong population |
| 18 |                      | Summaries for patients. Invasive streptococcal infections in hospitals in Ontario, Canada, 1992 to 2000                                                                              |                  |
| 19 | Anonymous, 2007      |                                                                                                                                                                                      | Wrong population |
| 20 |                      | Postpartum invasive group A streptococcal disease in the modern era                                                                                                                  |                  |
| 21 | Aronoff, 2008        |                                                                                                                                                                                      | Wrong population |
| 22 |                      | Pivotal Role of Preexisting Pathogen-Specific Antibodies in the Development of Necrotizing Soft-Tissue Infections                                                                    |                  |
| 23 | Babbar, 2018         |                                                                                                                                                                                      | Wrong population |
| 24 |                      | A serological evaluation of the host immune response during Necrotizing Soft Tissue Infections caused by Streptococcus pyogenes                                                      |                  |
| 25 | Babbar, 2016         |                                                                                                                                                                                      | Wrong population |
| 26 |                      | Impact of adjunctive clindamycin in invasive beta-hemolytic streptococcal infections: A propensity score-matched analysis of 1956 beta-lactam treated patients from 118 us hospitals |                  |
| 27 | Babiker, 2019        |                                                                                                                                                                                      | Wrong population |
| 28 |                      | Chemotherapy of acute bone and joint infections                                                                                                                                      |                  |
| 29 | Bajpai, 1977         |                                                                                                                                                                                      | Wrong population |
| 30 |                      | Bacteraemic Streptococcus pyogenes infection in the peripartum period: now a rare disease and prior carriage by the patient may be important                                         |                  |
| 31 | Barnham, 2001        |                                                                                                                                                                                      | Wrong population |
| 32 |                      | Risk factors in the pathogenesis of invasive group A streptococcal infections: Role of protective humoral immunity                                                                   |                  |
| 33 | Basma, 1999          |                                                                                                                                                                                      | Wrong population |
| 34 |                      | Maternal deaths due to sepsis in the state of Michigan, 1999-2006                                                                                                                    |                  |
| 35 | Bauer, 2015          |                                                                                                                                                                                      | Wrong population |
| 36 |                      | Invasive group A Streptococcus infections associated with liposuction surgery at outpatient facilities not subject to state or federal regulation                                    |                  |
| 37 | Beaudoin, 2014       |                                                                                                                                                                                      | Wrong population |
| 38 |                      | Postoperative complications followed by septoplasty comparison between conventional nasal packing and glove finger pack                                                              |                  |
| 39 | Beigh, 2012          |                                                                                                                                                                                      | Wrong population |
| 40 |                      | The relationship of tampon characteristics to menstrual toxic shock syndrome                                                                                                         |                  |
| 41 | Berkley, 1987        |                                                                                                                                                                                      | Wrong population |
| 42 |                      | Necrotizing fasciitis in children: diagnostic and therapeutic aspects                                                                                                                |                  |
| 43 | Bingol-Kologlu, 2007 |                                                                                                                                                                                      | Wrong population |
| 44 |                      | Necrotizing soft tissue infections caused by Streptococcus pyogenes and Streptococcus dysgalactiae subsp. equisimilis of groups C and G in western Norway                            |                  |
| 45 | Bruun, 2013          |                                                                                                                                                                                      | Wrong population |
| 46 |                      | Risk factors and Predictors of Mortality in Streptococcal Necrotizing Soft-Tissue Infections: A Multicenter Prospective Study                                                        |                  |
| 47 | Bruun, 2020          |                                                                                                                                                                                      | Wrong population |
| 48 |                      |                                                                                                                                                                                      |                  |
| 49 |                      |                                                                                                                                                                                      |                  |
| 50 |                      |                                                                                                                                                                                      |                  |
| 51 |                      |                                                                                                                                                                                      |                  |
| 52 |                      |                                                                                                                                                                                      |                  |
| 53 |                      |                                                                                                                                                                                      |                  |
| 54 |                      |                                                                                                                                                                                      |                  |
| 55 |                      |                                                                                                                                                                                      |                  |
| 56 |                      |                                                                                                                                                                                      |                  |
| 57 |                      |                                                                                                                                                                                      |                  |
| 58 |                      |                                                                                                                                                                                      |                  |
| 59 |                      |                                                                                                                                                                                      |                  |
| 60 |                      |                                                                                                                                                                                      |                  |

|    |                           |                                                                                                                                                              |                  |
|----|---------------------------|--------------------------------------------------------------------------------------------------------------------------------------------------------------|------------------|
| 1  |                           |                                                                                                                                                              |                  |
| 2  |                           |                                                                                                                                                              |                  |
| 3  |                           |                                                                                                                                                              |                  |
| 4  | Busowski, 2013            | Puerperal group a streptococcal infections: A case series and discussion                                                                                     | Wrong population |
| 5  |                           |                                                                                                                                                              |                  |
| 6  | Byer, 2006                | Clinical deterioration among patients with fever and erythroderma                                                                                            | Wrong population |
| 7  |                           |                                                                                                                                                              |                  |
| 8  | Centers for Disease, 1982 | Toxic-shock syndrome, United States, 1970-1982                                                                                                               | Wrong population |
| 9  |                           |                                                                                                                                                              |                  |
| 10 | Centers for Disease, 2011 | Invasive group A streptococcus in a skilled nursing facility-- Pennsylvania, 2009-2010                                                                       | Wrong population |
| 11 |                           |                                                                                                                                                              |                  |
| 12 | Chan, 2009                | Toxic shock syndrome and rhinosinusitis in children                                                                                                          | Wrong population |
| 13 |                           |                                                                                                                                                              |                  |
| 14 | Chen, 2011                | The microbiological profile and presence of bloodstream infection influence mortality rates in necrotizing fasciitis                                         | Wrong population |
| 15 |                           |                                                                                                                                                              |                  |
| 16 | Chen, 2015                | Clinical Characteristics and Risk Factor Analysis for Lower-Extremity Amputations in Diabetic Patients With Foot Ulcer Complicated by Necrotizing Fasciitis  | Wrong population |
| 17 |                           |                                                                                                                                                              |                  |
| 18 | Chen, 2018                | Macro- and Microvascular Parameters After Toxic Shock Syndrome                                                                                               | Wrong population |
| 19 |                           |                                                                                                                                                              |                  |
| 20 | Ching, 2019               | Prospective surveillance of pediatric invasive group A Streptococcus infection                                                                               | Wrong population |
| 21 |                           |                                                                                                                                                              |                  |
| 22 | Chiobotaru, 1997          | Changing epidemiology of invasive Streptococcus pyogenes infections in southern Israel: differences between two ethnic population groups                     | Wrong population |
| 23 |                           |                                                                                                                                                              |                  |
| 24 | Christie, 1988            | Bacteremia with group A streptococci in childhood                                                                                                            | Wrong population |
| 25 |                           |                                                                                                                                                              |                  |
| 26 | Corona, 2016              | Necrotising fasciitis of the extremities: implementation of new management technologies                                                                      | Wrong population |
| 27 |                           |                                                                                                                                                              |                  |
| 28 |                           |                                                                                                                                                              |                  |
| 29 | Daneman, 2007             | Surveillance for hospital outbreaks of invasive group a streptococcal infections in Ontario, Canada, 1992 to 2000                                            | Wrong population |
| 30 |                           |                                                                                                                                                              |                  |
| 31 | Daneman, 2005             | Hospital-acquired invasive group A streptococcal infections in Ontario, Canada, 1992-2000                                                                    | Wrong population |
| 32 |                           |                                                                                                                                                              |                  |
| 33 |                           |                                                                                                                                                              |                  |
| 34 | Davies, 1996              | Invasive group A streptococcal infections in Ontario, Canada. Ontario Group A Streptococcal Study Group                                                      | Wrong population |
| 35 |                           |                                                                                                                                                              |                  |
| 36 | Davis, 1982               | Toxic shock syndrome: a critique of the 1980 Wisconsin case-control study                                                                                    | Wrong population |
| 37 |                           |                                                                                                                                                              |                  |
| 38 | De Almeida Torres, 2013   | Group a streptococcus meningitis in children                                                                                                                 | Wrong population |
| 39 |                           |                                                                                                                                                              |                  |
| 40 |                           |                                                                                                                                                              |                  |
| 41 | Deutscher, 2011           | Incidence and severity of invasive Streptococcus pneumoniae, group A Streptococcus, and group B Streptococcus infections among pregnant and postpartum women | Wrong population |
| 42 |                           |                                                                                                                                                              |                  |
| 43 | Devaney, 2015             | Necrotising soft tissue infections: The effect of hyperbaric oxygen on mortality                                                                             | Wrong population |
| 44 |                           |                                                                                                                                                              |                  |
| 45 |                           |                                                                                                                                                              |                  |
| 46 | Dooling, 2013             | Investigation of a prolonged Group A Streptococcal outbreak among residents of a skilled nursing facility, Georgia, 2009-2012                                | Wrong population |
| 47 |                           |                                                                                                                                                              |                  |
| 48 | Dworkin, 2009             | The epidemiology of necrotizing fasciitis including factors associated with death and amputation                                                             | Wrong population |
| 49 |                           |                                                                                                                                                              |                  |
| 50 |                           |                                                                                                                                                              |                  |
| 51 | Eneli, 2007               | Epidemiology and Outcome of Necrotizing Fasciitis in Children: An Active Surveillance Study of the Canadian Paediatric Surveillance Program                  | Wrong population |
| 52 |                           |                                                                                                                                                              |                  |
| 53 | Factor, 2005              | Risk factors for pediatric invasive group A streptococcal disease                                                                                            | Wrong population |
| 54 |                           |                                                                                                                                                              |                  |
| 55 | Factor, 2003              | Invasive group a streptococcal disease: Risk factors for adults                                                                                              | Wrong population |
| 56 |                           |                                                                                                                                                              |                  |
| 57 |                           |                                                                                                                                                              |                  |
| 58 |                           |                                                                                                                                                              |                  |
| 59 |                           |                                                                                                                                                              |                  |
| 60 |                           |                                                                                                                                                              |                  |

|    |                    |                                                                                                                                                                    |                                                                               |
|----|--------------------|--------------------------------------------------------------------------------------------------------------------------------------------------------------------|-------------------------------------------------------------------------------|
| 1  |                    |                                                                                                                                                                    |                                                                               |
| 2  |                    |                                                                                                                                                                    |                                                                               |
| 3  |                    |                                                                                                                                                                    |                                                                               |
| 4  | Fauno Thrane, 2017 | Hyperbaric oxygen may only be optional in head and neck necrotizing fasciitis: a retrospective analysis of 43 cases and review of the literature                   | Wrong population                                                              |
| 5  |                    |                                                                                                                                                                    |                                                                               |
| 6  | Fichtenbaum, 1993  | Ehrlichiosis presenting as a life-threatening illness with features of the toxic shock syndrome                                                                    | Wrong population                                                              |
| 7  |                    |                                                                                                                                                                    |                                                                               |
| 8  | Flavahan, 2014     | Incidence of periorbital necrotising fasciitis in the UK population: A BOSU study                                                                                  | Wrong population                                                              |
| 9  |                    |                                                                                                                                                                    |                                                                               |
| 10 | Flores, 2019       | Capsule-negative EMM types are an increasing cause of pediatric group a streptococcal infections at a large pediatric hospital in Texas                            | Wrong population                                                              |
| 11 |                    |                                                                                                                                                                    |                                                                               |
| 12 | Frere, 2016        | Clinical and Microbiological Characteristics of Invasive Group A Streptococcal Infections Before and After Implementation of a Universal Varicella Vaccine Program | Wrong population                                                              |
| 13 |                    |                                                                                                                                                                    |                                                                               |
| 14 | Givner, 1998       | Invasive disease due to group A beta-hemolytic streptococci: Continued occurrence in children in North Carolina                                                    | Wrong population                                                              |
| 15 |                    |                                                                                                                                                                    |                                                                               |
| 16 | Givner, 1991       | Apparent increase in the incidence of invasive group A beta-hemolytic streptococcal disease in children                                                            | Wrong population                                                              |
| 17 |                    |                                                                                                                                                                    |                                                                               |
| 18 | Gooskens, 2005     | Streptococcal toxic shock syndrome by an iMLS resistant M type 77 Streptococcus pyogenes in the Netherlands                                                        | Wrong population                                                              |
| 19 |                    |                                                                                                                                                                    |                                                                               |
| 20 | Gonzalez, 1996     | Necrotizing fasciitis of the upper extremity                                                                                                                       | Wrong population                                                              |
| 21 |                    |                                                                                                                                                                    |                                                                               |
| 22 | Lesko, 2001        | Invasive group A streptococcal infection and nonsteroidal antiinflammatory drug use among children with primary varicella                                          | Wrong population                                                              |
| 23 |                    |                                                                                                                                                                    |                                                                               |
| 24 | Lin, 2013          | Group a streptococcal necrotizing fasciitis in the emergency department                                                                                            | Wrong population                                                              |
| 25 |                    |                                                                                                                                                                    |                                                                               |
| 26 | Lin, 2015          | Early Differentiation of Kawasaki Disease Shock Syndrome and Toxic Shock Syndrome in a Pediatric Intensive Care Unit                                               | Wrong population                                                              |
| 27 |                    |                                                                                                                                                                    |                                                                               |
| 28 | Parks, 2019        | Elevated risk of invasive group A streptococcal disease and host genetic variation in the human leucocyte antigen locus                                            | Wrong population                                                              |
| 29 |                    |                                                                                                                                                                    |                                                                               |
| 30 | Stromberg, 1991    | Outbreak of group A streptococcal bacteremia in Sweden: an epidemiologic and clinical study                                                                        | Wrong population                                                              |
| 31 |                    |                                                                                                                                                                    |                                                                               |
| 32 | Haggar, 2012       | Clinical and microbiologic characteristics of invasive Streptococcus pyogenes infections in north and south India                                                  | Relationship between prognostic factor and outcome not reported or quantified |
| 33 |                    |                                                                                                                                                                    |                                                                               |
| 34 | Laupland, 2000     | Invasive group A streptococcal disease in children and association with varicella-zoster virus infection. Ontario Group A Streptococcal Study Group                | Relationship between prognostic factor and outcome not reported or quantified |
| 35 |                    |                                                                                                                                                                    |                                                                               |
| 36 | Linnemann, 1986    | Increasing incidence of toxic shock syndrome in the 1970s                                                                                                          | Relationship between prognostic factor and outcome not reported or quantified |
| 37 |                    |                                                                                                                                                                    |                                                                               |
| 38 | Miday, 1988        | Toxic shock syndrome: incidence and geographic distribution from a hospital medical records reporting system                                                       | Relationship between prognostic factor and outcome not reported or quantified |
| 39 |                    |                                                                                                                                                                    |                                                                               |
| 40 | Mosites, 2018      | Outbreak of Invasive Infections from Subtype emm26.3 Group A Streptococcus among Homeless Adults-Anchorage, Alaska, 2016-2017                                      | Relationship between prognostic factor and outcome not reported or quantified |
| 41 |                    |                                                                                                                                                                    |                                                                               |
| 42 |                    |                                                                                                                                                                    |                                                                               |
| 43 |                    |                                                                                                                                                                    |                                                                               |
| 44 |                    |                                                                                                                                                                    |                                                                               |
| 45 |                    |                                                                                                                                                                    |                                                                               |
| 46 |                    |                                                                                                                                                                    |                                                                               |
| 47 |                    |                                                                                                                                                                    |                                                                               |
| 48 |                    |                                                                                                                                                                    |                                                                               |
| 49 |                    |                                                                                                                                                                    |                                                                               |
| 50 |                    |                                                                                                                                                                    |                                                                               |
| 51 |                    |                                                                                                                                                                    |                                                                               |
| 52 |                    |                                                                                                                                                                    |                                                                               |
| 53 |                    |                                                                                                                                                                    |                                                                               |
| 54 |                    |                                                                                                                                                                    |                                                                               |
| 55 |                    |                                                                                                                                                                    |                                                                               |
| 56 |                    |                                                                                                                                                                    |                                                                               |
| 57 |                    |                                                                                                                                                                    |                                                                               |
| 58 |                    |                                                                                                                                                                    |                                                                               |
| 59 |                    |                                                                                                                                                                    |                                                                               |
| 60 |                    |                                                                                                                                                                    |                                                                               |

|                        |                                                                                                                                                               |                                                                               |
|------------------------|---------------------------------------------------------------------------------------------------------------------------------------------------------------|-------------------------------------------------------------------------------|
| O'Grady, 2007          | The epidemiology of invasive group A streptococcal disease in Victoria, Australia                                                                             | Relationship between prognostic factor and outcome not reported or quantified |
| Petitti, 1989          | Update through 1985 on the incidence of toxic shock syndrome among members of a prepaid health plan                                                           | Relationship between prognostic factor and outcome not reported or quantified |
| Pilon, 2019            | Invasive group A streptococcal infection outbreaks of typeemm118 in a long-term care facility, and of type emm74 in the homeless population, Montreal, Quebec | Relationship between prognostic factor and outcome not reported or quantified |
| Rantala, 2012          | Streptococcus pyogenes bacteraemia, emm types and superantigen profiles                                                                                       | Relationship between prognostic factor and outcome not reported or quantified |
| Tanner, 1981           | Toxic shock syndrome                                                                                                                                          | Relationship between prognostic factor and outcome not reported or quantified |
| Teatero, 2018          | Canada-Wide Epidemic of emm74 Group A Streptococcus Invasive Disease                                                                                          | Relationship between prognostic factor and outcome not reported or quantified |
| Todd, 1985             | Toxic shock syndrome. II. Estimated occurrence in Colorado as influenced by case ascertainment methods                                                        | Relationship between prognostic factor and outcome not reported or quantified |
| Tsai, 2014             | Correlation of virulence genes to clinical manifestations and outcome in patients with Streptococcus dysgalactiae subspecies equisimilis bacteremia           | Relationship between prognostic factor and outcome not reported or quantified |
| Vallalta Morales, 2006 | Group A streptococcal bacteremia: outcome and prognostic factors                                                                                              | Relationship between prognostic factor and outcome not reported or quantified |
| Vlaminckx, 2004        | Epidemiological features of invasive and noninvasive group A streptococcal disease in the Netherlands, 1992-1996                                              | Relationship between prognostic factor and outcome not reported or quantified |
| Aydin, 2017            | Clinical indications of intravenous immunoglobulin use in pediatric infectious diseases clinic                                                                | Relationship between prognostic factor and outcome not reported or quantified |
| Ben-Abraham, 2002      | Invasive group A streptococcal infections in a large tertiary center: epidemiology, characteristics and outcome                                               | Relationship between prognostic factor and outcome not reported or quantified |
| Bohicchio, 2001        | Group A Streptococcus (GAS) soft-tissue infections: a lethal organism on the rise                                                                             | Relationship between prognostic factor and outcome not reported or quantified |
| Cancellara, 2016       | Multicenter study on invasive Streptococcus pyogenes infections in children in Argentina                                                                      | Relationship between prognostic factor and                                    |



|                       |                                                                                                                                                      |                                                                               |
|-----------------------|------------------------------------------------------------------------------------------------------------------------------------------------------|-------------------------------------------------------------------------------|
|                       |                                                                                                                                                      | outcome not reported or quantified                                            |
| Chen, 2016            | Toxic shock syndrome in Australian children                                                                                                          | Relationship between prognostic factor and outcome not reported or quantified |
| Doctor, 1995          | Group A beta-hemolytic streptococcal bacteremia: historical overview, changing incidence, and recent association with varicella                      | Relationship between prognostic factor and outcome not reported or quantified |
| Eriksson, 2003        | Group A streptococcal infections in Sweden: a comparative study of invasive and noninvasive infections and analysis of dominant T28 emm28 isolates   | Relationship between prognostic factor and outcome not reported or quantified |
| Norrby-Teglund, 2003  | The treatment of severe group a streptococcal infections                                                                                             | Relationship between prognostic factor and outcome not reported or quantified |
| Rodriguez-Nunez, 2011 | Clinical characteristics of children with group A streptococcal toxic shock syndrome admitted to pediatric intensive care units                      | Relationship between prognostic factor and outcome not reported or quantified |
| Snall, 2016           | Differential neutrophil responses to bacterial stimuli: Streptococcal strains are potent inducers of heparin-binding protein and resistin-release    | Relationship between prognostic factor and outcome not reported or quantified |
| Eriksson, 1998        | Epidemiological and clinical aspects of invasive group A streptococcal infections and the streptococcal toxic shock syndrome                         | Relationship between prognostic factor and outcome not reported or quantified |
| Sahli, 2014           | Necrotizing fasciitis in diabetic patients: A report of 14 cases                                                                                     | Not in English                                                                |
| Arnholm, 2004         | High-dose immunoglobulin - Life-saving in invasive group a streptococcal infection                                                                   | Not in English                                                                |
| Caetano, 2010         | [S. Pyogenes invasive disease in a paediatric hospital: 1996-2009]                                                                                   | Not in English                                                                |
| Costa Orvay, 2007     | [Toxic shock syndrome: experience in a pediatric intensive care unit]                                                                                | Not in English                                                                |
| Dosil Gallardo, 2009  | [Streptococcal toxic shock syndrome: an emerging pathology?]                                                                                         | Not in English                                                                |
| Emmi, 1999            | Severe infection from invasive beta-hemolytic streptococcus group A. Three cases of toxic shock observed in resuscitation                            | Not in English                                                                |
| Faye, 2014            | Management of severe invasive group A streptococcal infections                                                                                       | Not in English                                                                |
| Floret, 2001          | Clinical aspects of staphylococcal and streptococcal toxic diseases                                                                                  | Not in English                                                                |
| Hua, 2018             | [Streptococcal toxic shock syndrome caused by Streptococcus pyogenes: a retrospective study of 15 pediatric cases]                                   | Not in English                                                                |
| Kach, 1993            | [Necrotizing soft tissue infections]                                                                                                                 | Not in English                                                                |
| Kaul, 1999            | Intravenous immunoglobulin therapy for streptococcal toxic shock syndrome--a comparative observational study. The Canadian Streptococcal Study Group | Duplicate                                                                     |
| Salinas, 2005         | Immunoglobulins in sepsis and septic shock                                                                                                           | Not in English                                                                |

|                        |                                                                                                                                                                            |                    |
|------------------------|----------------------------------------------------------------------------------------------------------------------------------------------------------------------------|--------------------|
| Shands, 1982           | Toxic shock syndrome: case-control studies at the Centers for Disease Control                                                                                              | Duplicate          |
| Sierra, 2006           | Group A streptococcal infections in injection drug users in Barcelona, Spain: epidemiologic, clinical, and microbiologic analysis of 3 clusters of cases from 2000 to 2003 | Duplicate          |
| Urbina, 2019           | Early identification of patients at high risk of group A streptococcus-associated necrotizing skin and soft tissue infections: A retrospective cohort study                | Duplicate          |
| Vallalta-Morales, 2005 | [Streptococcal toxic shock syndrome: ten years' experience at a tertiary hospital]                                                                                         | Not in English     |
| Vasant, 2019           | Mass prophylaxis in an outbreak of invasive group A streptococcal disease in a residential aged care facility                                                              | Duplicate          |
| Vugia, 1996            | Invasive group A streptococcal infections in children with varicella in Southern California                                                                                | Duplicate          |
| Zachariadou, 2014      | Differences in the epidemiology between paediatric and adult invasive <i>Streptococcus pyogenes</i> infections                                                             | Duplicate          |
| Bernard, 1995          | [Bacterial dermo-hypodermatitis in adults. Incidence and role of streptococcal etiology]                                                                                   | Not in English     |
| Bleton, 1991           | Necrotizing fasciitis of the upper limb. 12 cases                                                                                                                          | Not in English     |
| Bleton, 1991           | Necrotising fasciitis of the upper limb. Report of twelve cases                                                                                                            | Duplicate          |
| Fan, 2014              | [Clinical characteristics and antimicrobial resistance of invasive group A beta-hemolytic streptococcus infection in children]                                             | Not in English     |
| Fica, 2003             | Molecular epidemiology of a streptococcus pyogenes related nosocomial outbreak in a burn unit                                                                              | Not in English     |
| Fredlund, 1990         | [Increased frequency of group A hemolytic streptococci. Old age and immune deficiency among the risk factors]                                                              | Not in English     |
| Georgiev, 1993         | Puerperal streptococcal sepsis                                                                                                                                             | Not in English     |
| Khan, 2003             | Treatment of necrotizing fasciitis with quinolones                                                                                                                         | Wrong population   |
| Frosi, 1999            | Necrotizing fasciitis: A serious and uncommon alcohol related disease                                                                                                      | Wrong study design |
| Nedrebo, 2020          | Necrotizing Soft Tissue Infections: Case Reports, from the Clinician's Perspectives.                                                                                       | Wrong study design |
| Reicher, 2021          | 450 Obstetrically related group a streptococcal infection and predictors for severity - retrospective 12-year cohort study                                                 | Wrong study design |
| Bajpai, 2020           | Anti-microbial-resistance and profile of exotoxins of invasive beta-haemolytic-streptococci infections in trauma patients                                                  | Wrong population   |
| Adamkova, 2020         | Can gram-negative-like biomarker values in <i>Streptococcus pyogenes</i> sepsis negatively influence right choice of initial antibiotic therapy?                           | Wrong population   |
| Bandi, 2021            | Group A streptococcal infections in children                                                                                                                               | Wrong population   |
| Ceccato, 2020          | Use of corticosteroids in patients with severe CAP admitted to ICU, experience in a real-life setting                                                                      | Wrong population   |
| Tepper, 2021           | Long-term safety and tolerability of atogepant following once daily dosing over 1 year for the preventive treatment of migraine                                            | Wrong population   |

|                         |                                                                                                                                                                                                      |                                                                               |
|-------------------------|------------------------------------------------------------------------------------------------------------------------------------------------------------------------------------------------------|-------------------------------------------------------------------------------|
| Melo, 2021              | Clinical, epidemiological and microbiological features of streptococcus pyogenes invasive infection - 10 year retrospective review                                                                   | Wrong population                                                              |
| Bringel, 2021           | Clinical characteristics and outcomes of children with toxic shock syndrome admitted to a pediatric intensive care unit: A case series                                                               | Wrong population                                                              |
| Neff, 2020              | Characterisation of clinical manifestations and treatment strategies for invasive beta-haemolytic streptococcal infections in a Swiss tertiary hospital.                                             | Wrong population                                                              |
| Urbina, 2020            | Assessing and applying individualized treatment for group A streptococcal necrotizing soft-tissue infection is possible                                                                              | Wrong population                                                              |
| Bergsten, 2020          | Correlation between immunoglobulin dose administered and plasma neutralization of streptococcal superantigens in patients with necrotizing soft tissue infections                                    | Wrong population                                                              |
| Boukthir, 2020          | A prospective survey of Streptococcus pyogenes infections in French Brittany from 2009 to 2017: Comprehensive dynamic of new emergent emm genotypes.                                                 | Wrong population                                                              |
| Escrinhuela-Vidal, 2021 | Clinical Features and Outcomes of Streptococcus anginosus Group Infective Endocarditis: A Multicenter Matched Cohort Study.                                                                          | Wrong population                                                              |
| Babiker, 2021           | Effectiveness of adjunctive clindamycin in beta-lactam antibiotic-treated patients with invasive beta-haemolytic streptococcal infections in US hospitals: a retrospective multicentre cohort study. | Wrong population                                                              |
| Cui, 2021               | Necrotizing soft tissue infection: clinical characteristics, diagnosis, and management of 32 cases in Beijing.                                                                                       | Wrong population                                                              |
| Link-Gelles, 2020       | Characteristics of Intracranial Group A Streptococcal Infections in US Children, 1997-2014.                                                                                                          | Wrong population                                                              |
| Peetermans, 2020        | Use of Intravenous Immunoglobulins in Patients with Suspected Toxin-Mediated Shock Requiring Extracorporeal Membrane Oxygenation.                                                                    | Wrong population                                                              |
| Bruun, 2020             | Beta-Hemolytic Streptococci and Necrotizing Soft Tissue Infections.                                                                                                                                  | Wrong population                                                              |
| Lima-Setta, 2021        | Multisystem inflammatory syndrome in children (MIS-C) during SARS-CoV-2 pandemic in Brazil: a multicenter, prospective cohort study.                                                                 | Wrong population                                                              |
| Kohler, 2020            | Kininogen supports inflammation and bacterial spreading during Streptococcus Pyogenes Sepsis.                                                                                                        | Wrong population                                                              |
| Bruun, 2021             | Risk Factors and Predictors of Mortality in Streptococcal Necrotizing Soft-tissue Infections: A Multicenter Prospective Study.                                                                       | Wrong population                                                              |
| Bjorck, 2020            | Morbidity and mortality in critically ill patients with invasive group A streptococcus infection: an observational study.                                                                            | Wrong population                                                              |
| Contou, 2021            | Menstrual toxic shock syndrome: a French nationwide multicenter retrospective study.                                                                                                                 | Wrong population                                                              |
| Billon, 2020            | Association of characteristics of tampon use with menstrual toxic shock syndrome in France.                                                                                                          | Wrong population                                                              |
| Canetti, 2021           | Invasive Group A Streptococcus Infection in Children in Central Israel in 2012-2019                                                                                                                  | Relationship between prognostic factor and outcome not reported or quantified |

|                   |                                                                                                                                                                    |                                                                               |
|-------------------|--------------------------------------------------------------------------------------------------------------------------------------------------------------------|-------------------------------------------------------------------------------|
| Vilhonen, 2020    | Group A streptococcal bacteremias in Southwest Finland 2007-2018: epidemiology and role of infectious diseases consultation in antibiotic treatment selection.     | Relationship between prognostic factor and outcome not reported or quantified |
| Thielemans, 2020  | Clinical Description and Outcomes of Australian Children With Invasive Group A Streptococcal Disease.                                                              | Relationship between prognostic factor and outcome not reported or quantified |
| Madsen, 2020      | Treatment of Necrotizing Soft Tissue Infections: IVIG                                                                                                              | Wrong study design                                                            |
| Deniskin, 2019    | Clinical Manifestations and Bacterial Genomic Analysis of Group A Streptococcus Strains That Cause Pediatric Toxic Shock Syndrome.                                 | Relationship between prognostic factor and outcome not reported or quantified |
| Mosites, 2018     | Outbreak of Invasive Infections From Subtype emm26.3 Group A Streptococcus Among Homeless Adults-Anchorage, Alaska, 2016-2017.                                     | Relationship between prognostic factor and outcome not reported or quantified |
| Hasin, 2020       | Invasive Group A Streptococcus Infection in Children in Southern Israel Before and After the Introduction of Varicella Vaccine.                                    | Wrong population                                                              |
| Ching, 2019       | Prospective Surveillance of Pediatric Invasive Group A Streptococcus Infection.                                                                                    | Wrong population                                                              |
| Loewen, 2017      | Epidemiologic features of invasive group A Streptococcus infection in a rural hospital: 6-year retrospective report and literature review.                         | Wrong population                                                              |
| Bergsten, 2020    | Correlation Between Immunoglobulin Dose Administered and Plasma Neutralization of Streptococcal Superantigens in Patients With Necrotizing Soft Tissue Infections. | Wrong population                                                              |
| Kobayashi, 2016   | A Cluster of Group A Streptococcal Infections in a Skilled Nursing Facility-the Potential Role of Healthcare Worker Presenteeism.                                  | Wrong population                                                              |
| Adebanjo, 2020    | Evaluating Household Transmission of Invasive Group A Streptococcus Disease in the United States Using Population-based Surveillance Data, 2013-2016.              | Wrong population                                                              |
| Link-Gelles, 2020 | Characteristics of Intracranial Group A Streptococcal Infections in US Children, 1997-2014.                                                                        | Wrong population                                                              |
| Bruun, 2021       | Risk Factors and Predictors of Mortality in Streptococcal Necrotizing Soft-tissue Infections: A Multicenter Prospective Study.                                     | Wrong population                                                              |
| Shah, 2015        | Role of intravenous immune globulin in streptococcal toxic shock syndrome and Clostridium difficile infection.                                                     | Wrong study design                                                            |
| Hayata, 2021      | Nationwide study of mortality and survival in pregnancy-related streptococcal toxic shock syndrome.                                                                | Duplicate                                                                     |

1  
2  
3  
4  
5  
6  
7  
8  
9  
10  
11  
12  
13  
14  
15  
16  
17  
18  
19  
20  
21  
22  
23  
24  
25  
26  
27  
28  
29  
30  
31  
32  
33  
34  
35  
36  
37  
38  
39  
40  
41  
42  
43  
44  
45  
46  
47

### Table of additional study characteristics

| Study                   | Study Design | Country                 | Number of STSS cases | Mean age   | % Male | Cardiovascular Disease (%) | Diabetes (%) | Presence of Necrotizing Fasciitis (%) | Probable GAS STSS (%) | Confirmed GAS STSS (%) | Prognostic factor and outcome combination of interest reported                                                                                                                                                                                                                                                                                                                                                                                                    |
|-------------------------|--------------|-------------------------|----------------------|------------|--------|----------------------------|--------------|---------------------------------------|-----------------------|------------------------|-------------------------------------------------------------------------------------------------------------------------------------------------------------------------------------------------------------------------------------------------------------------------------------------------------------------------------------------------------------------------------------------------------------------------------------------------------------------|
| Abuhammour 2004         | Cohort       | United States           | 2                    | 9          | 100    | NR                         | NR           | NR                                    | NR                    | NR                     | age - clinical cure/improvement^<br>age - ICU admission^<br>age - mortality^<br>any antibiotic - clinical cure/improvement^<br>any antibiotic - ICU admission<br>any antibiotic - mortality                                                                                                                                                                                                                                                                       |
| Adalat 2014             | Cohort       | United Kingdom, Ireland | 29                   | 4 (median) | 62     | NR                         | NR           | 28                                    | 38                    | 62                     | IVIG - mortality                                                                                                                                                                                                                                                                                                                                                                                                                                                  |
| Al-Ajmi 2012            | Case-series  | Qatar                   | 2                    | 35         | 0      | NR                         | NR           | NR                                    | 0                     | 100                    | age - clinical cure/improvement^<br>age - ICU admission^<br>age - mortality^                                                                                                                                                                                                                                                                                                                                                                                      |
| Barnham 2002            | Case-series  | England                 | 12                   | 57         | 64     | NR                         | NR           | 58                                    | 17                    | 83                     | age - ICU admission^<br>age - mortality^<br>any antibiotic - ICU admission<br>any antibiotic - mortality<br>clindamycin - ICU admission^<br>clindamycin - mortality<br>emm type - ICU admission^<br>emm type - mortality^<br>immunocompromised - ICU admission^<br>immunocompromised - mortality<br>IVIG - ICU admission<br>IVIG - mortality<br>IVIG - time to mortality^<br>NF - ICU admission<br>NF - mortality<br>NSAIDs - ICU admission<br>NSAIDs - mortality |
| Bernaldo de Quiros 1997 | Cohort       | Spain                   | 9                    | NR         | NR     | NR                         | NR           | NR                                    | NR                    | NR                     | immunocompromised - mortality^                                                                                                                                                                                                                                                                                                                                                                                                                                    |

| Study                   | Study Design | Country       | Number of STSS cases | Mean age | % Male | Cardiovascular Disease (%) | Diabetes (%) | Presence of Necrotizing Fasciitis (%) | Probable GAS STSS (%) | Confirmed GAS STSS (%) | Prognostic factor and outcome combination of interest reported                                                                                                                                                                                                                                                                                                                                                                                                                                                                                                                                                                                                                                                           |
|-------------------------|--------------|---------------|----------------------|----------|--------|----------------------------|--------------|---------------------------------------|-----------------------|------------------------|--------------------------------------------------------------------------------------------------------------------------------------------------------------------------------------------------------------------------------------------------------------------------------------------------------------------------------------------------------------------------------------------------------------------------------------------------------------------------------------------------------------------------------------------------------------------------------------------------------------------------------------------------------------------------------------------------------------------------|
| Brogan 1995             | Case-series  | United States | 5                    | 6        | 60     | NR                         | NR           | 100                                   | 60                    | 40                     | age - clinical cure/improvement^<br>age - hospital LOS^<br>age - ICU admission^<br>age - ICU LOS^<br>age - mortality^<br>NSAIDs - clinical cure/improvement^<br>NSAIDs - hospital LOS^<br>NSAIDs - ICU admission<br>NSAIDs - ICU LOS^<br>NSAIDs - mortality<br>sex - clinical cure/improvement<br>sex - hospital LOS^<br>sex - ICU admission<br>sex - ICU LOS^<br>sex - mortality                                                                                                                                                                                                                                                                                                                                        |
| Butragueno Laiseca 2017 | Case-series  | Spain         | 13                   | 2        | 50     | NR                         | NR           | 15                                    | 15                    | 85                     | acute renal failure - clinical cure/improvement^<br>acute renal failure - mechanical ventilation<br>acute renal failure - mortality<br>age - clinical cure/improvement^<br>age - ICU LOS^<br>age - mechanical ventilation^<br>age - mortality^<br>clindamycin - clinical cure/improvement^<br>clindamycin - ICU LOS^<br>clindamycin - mechanical ventilation^<br>clindamycin - mortality<br>hemodialysis - clinical cure/improvement<br>hemodialysis - mechanical ventilation<br>hemodialysis - mortality<br>IVIG - clinical cure/improvement<br>IVIG - ICU LOS<br>IVIG - mechanical ventilation<br>IVIG - mortality<br>NF - clinical cure/improvement<br>NF - ICU LOS^<br>NF - mechanical ventilation<br>NF - mortality |
| Carapetis 1995          | Case-series  | Australia     | 5                    | NR       | NR     | NR                         | NR           | NR                                    | NR                    | NR                     | age - mortality^                                                                                                                                                                                                                                                                                                                                                                                                                                                                                                                                                                                                                                                                                                         |

1  
2  
3  
4  
5  
6  
7  
8  
9  
10  
11  
12  
13  
14  
15  
16  
17  
18  
19  
20  
21  
22  
23  
24  
25  
26  
27  
28  
29  
30  
31  
32  
33  
34  
35  
36  
37  
38  
39  
40  
41  
42  
43  
44  
45  
46  
47

1  
2  
3  
4  
5  
6  
7  
8  
9  
10  
11  
12  
13  
14  
15  
16  
17  
18  
19  
20  
21  
22  
23  
24  
25  
26  
27  
28  
29  
30  
31  
32  
33  
34  
35  
36  
37  
38  
39  
40  
41  
42  
43  
44  
45  
46  
47

| Study          | Study Design     | Country                              | Number of STSS cases | Mean age | % Male | Cardiovascular Disease (%) | Diabetes (%) | Presence of Necrotizing Fasciitis (%) | Probable GAS STSS (%) | Confirmed GAS STSS (%) | Prognostic factor and outcome combination of interest reported                                                                                                                                                                                                 |
|----------------|------------------|--------------------------------------|----------------------|----------|--------|----------------------------|--------------|---------------------------------------|-----------------------|------------------------|----------------------------------------------------------------------------------------------------------------------------------------------------------------------------------------------------------------------------------------------------------------|
| Carapetis 2014 | Cohort           | Australia                            | 37                   | 60       | 50     | NR                         | NR           | 100                                   | 0                     | 100                    | age - mortality^<br>IVIG - mortality<br>sex - mortality                                                                                                                                                                                                        |
| Cimolai 1992   | Case-series      | Canada                               | 4                    | 8        | 50     | NR                         | NR           | NR                                    | 0                     | 100                    | age - clinical cure/improvement^<br>age - mortality^<br>sex - clinical cure/improvement<br>sex - mortality                                                                                                                                                     |
| Cook 2020      | Cohort           | United States                        | 27                   | 9        | 44     | NR                         | NR           | 19                                    | 56                    | 44                     | other - other^                                                                                                                                                                                                                                                 |
| Cowan 1994     | Case-series      | United States                        | 3                    | 2        | 67     | NR                         | NR           | NR                                    | 100                   | 0                      | age - clinical cure/improvement^<br>age - ICU admission^<br>age - ICU LOS^<br>age - mechanical ventilation^<br>age - mortality^<br>sex - clinical cure/improvement<br>sex - ICU admission<br>sex - ICU LOS^<br>sex - mechanical ventilation<br>sex - mortality |
| Crum 2004      | Case-series      | United States                        | 2                    | 24       | 100    | NR                         | NR           | 50                                    | 0                     | 100                    | age - clinical cure/improvement^<br>age - ICU admission^<br>age - mechanical ventilation^<br>age - mortality^<br>hemodialysis - clinical cure/improvement<br>hemodialysis - ICU admission<br>hemodialysis - mechanical ventilation<br>hemodialysis - mortality |
| Dahl 2002      | Case-series      | United States                        | 5                    | 53       | NR     | NR                         | NR           | 100                                   | 0                     | 100                    | age - mortality^<br>immunocompromised - mortality                                                                                                                                                                                                              |
| Darenberg 2003 | Randomized trial | Sweden, Norway, Finland, Netherlands | 18                   | 52       | 48     | NR                         | NR           | NR                                    | 11                    | 89                     | IVIG - change in SOFA score^<br>IVIG - mortality<br>IVIG - time to clinical cure/improvement^<br>IVIG - time to mortality^                                                                                                                                     |

| Study          | Study Design | Country       | Number of STSS cases | Mean age       | % Male | Cardiovascular Disease (%) | Diabetes (%) | Presence of Necrotizing Fasciitis (%) | Probable GAS STSS (%) | Confirmed GAS STSS (%) | Prognostic factor and outcome combination of interest reported                                                                                                                                                                                                                                                                                                                     |
|----------------|--------------|---------------|----------------------|----------------|--------|----------------------------|--------------|---------------------------------------|-----------------------|------------------------|------------------------------------------------------------------------------------------------------------------------------------------------------------------------------------------------------------------------------------------------------------------------------------------------------------------------------------------------------------------------------------|
| Donaldson 1993 | Case-series  | England       | 5                    | 67             | 20     | NR                         | NR           | 100                                   | NR                    | NR                     | age - mortality^<br>any antibiotic - mortality<br>sex - mortality                                                                                                                                                                                                                                                                                                                  |
| Erdem 2004     | Case-series  | United States | 3                    | 52             | 67     | NR                         | NR           | 100                                   | NR                    | 33                     | age - mortality^<br>sex - mortality                                                                                                                                                                                                                                                                                                                                                |
| Eriksson 1999  | Cohort       | Sweden        | 6                    | 46             | 83     | NR                         | NR           | NR                                    | 0                     | 100                    | age - mortality^<br>emm type - mortality^<br>sex - mortality                                                                                                                                                                                                                                                                                                                       |
| Forni 1995     | Case-series  | United States | 5                    | 54             | 83     | NR                         | 17           | 50                                    | 0                     | 100                    | acute renal failure - ICU admission^<br>acute renal failure - mortality<br>age - hospital LOS^<br>age - ICU admission^<br>age - mortality^<br>emm type - ICU admission^<br>emm type - mortality^<br>NF - ICU admission<br>NF - mortality                                                                                                                                           |
| Fronhoffs 2000 | Case-series  | Germany       | 7                    | 49             | 71     | 14                         | 14           | 86                                    | 86                    | 14                     | acute renal failure - mechanical ventilation<br>acute renal failure - mortality<br>age - mechanical ventilation^<br>age - mortality^<br>immunocompromised - mechanical ventilation^<br>immunocompromised - mortality<br>NF - mechanical ventilation<br>NF - mortality<br>NSAIDs - mechanical ventilation^<br>NSAIDs - mortality<br>sex - mechanical ventilation<br>sex - mortality |
| Hasegawa 2004  | Case-control | Japan         | 66*                  | Range: 0 to 70 | 59     | NR                         | 18           | NR                                    | 100                   | 0                      | acute renal failure - mortality                                                                                                                                                                                                                                                                                                                                                    |
| Hayata 2021    | Cohort       | Japan         | 28                   | NR             | 0      | NR                         | NR           | NR                                    | 0                     | 100                    | age - mortality^<br>NSAIDs - mortality                                                                                                                                                                                                                                                                                                                                             |



1  
2  
3  
4  
5  
6  
7  
8  
9  
10  
11  
12  
13  
14  
15  
16  
17  
18  
19  
20  
21  
22  
23  
24  
25  
26  
27  
28  
29  
30  
31  
32  
33  
34  
35  
36  
37  
38  
39  
40  
41  
42  
43  
44  
45  
46  
47

| Study            | Study Design | Country                                                                                                   | Number of STSS cases | Mean age | % Male | Cardiovascular Disease (%) | Diabetes (%) | Presence of Necrotizing Fasciitis (%) | Probable GAS STSS (%) | Confirmed GAS STSS (%) | Prognostic factor and outcome combination of interest reported                                                                     |
|------------------|--------------|-----------------------------------------------------------------------------------------------------------|----------------------|----------|--------|----------------------------|--------------|---------------------------------------|-----------------------|------------------------|------------------------------------------------------------------------------------------------------------------------------------|
| Huang 2001       | Case-series  | Taiwan                                                                                                    | 3                    | 6        | 100    | NR                         | NR           | NR                                    | 33                    | 67                     | age - mortality^                                                                                                                   |
| Kansal 2000      | Cohort       | Canada                                                                                                    | 28                   | NR       | NR     | NR                         | NR           | NR                                    | NR                    | NR                     | NF - other^                                                                                                                        |
| Kaul 1999        | Case-control | Canada                                                                                                    | 53                   | 57       | 55     | NR                         | NR           | NR                                    | NR                    | NR                     | dindamycin - mortality<br>IVIG - duration of mechanical ventilation^<br>IVIG - hospital LOS<br>IVIG - mortality<br>NF - mortality  |
| Linder 2017      | Cohort       | United States                                                                                             | 10                   | NR       | NR     | NR                         | NR           | NR                                    | 0                     | 100                    | immunocompromised - mortality                                                                                                      |
| Linnér 2014      | Cohort       | Sweden                                                                                                    | 67                   | 63       | 42     | 48                         | 16           | 28                                    | NR                    | NR                     | age - mortality^<br>dindamycin - mortality<br>IVIG - hospital LOS<br>IVIG - mortality                                              |
| Luca-Harari 2009 | Cohort       | Cyprus, Czech Republic, Denmark, Finland, France, Germany, Greece, Italy, Romania, Sweden, United Kingdom | 476                  | NR       | NR     | NR                         | NR           | NR                                    | NR                    | NR                     | emm type - mortality^                                                                                                              |
| Nelson 2016      | Cohort       | United States                                                                                             | 381                  | NR       | NR     | NR                         | NR           | 19                                    | NR                    | NR                     | age - mortality<br>NF - mortality                                                                                                  |
| O'Loughlin 2007  | Cohort       | United States                                                                                             | 309                  | NR       | NR     | NR                         | NR           | 20                                    | NR                    | NR                     | age - mortality<br>NF - mortality                                                                                                  |
| Page 2011        | Cohort       | Canada                                                                                                    | 16                   | NR       | NR     | NR                         | NR           | NR                                    | NR                    | NR                     | other - other^                                                                                                                     |
| Safar 2011       | Cohort       | New Zealand                                                                                               | 30                   | NR       | NR     | NR                         | NR           | 17                                    | 0                     | 100                    | age - mortality<br>NF - mortality                                                                                                  |
| Schwartz 1992    | Case-series  | United States                                                                                             | 8                    | 40       | 40     | NR                         | NR           | NR                                    | 0                     | 100                    | age - mortality^<br>emm type - mortality^<br>sex - mortality                                                                       |
| Shah 2009        | Cohort       | United States                                                                                             | 192                  | 8        | 49     | NR                         | NR           | NR                                    | NR                    | NR                     | IVIG - cost^<br>IVIG - hospital LOS<br>IVIG - ICU admission<br>IVIG - ICU LOS<br>IVIG - mechanical ventilation<br>IVIG - mortality |

| Study            | Study Design | Country       | Number of STSS cases | Mean age    | % Male | Cardiovascular Disease (%) | Diabetes (%) | Presence of Necrotizing Fasciitis (%) | Probable GAS STSS (%) | Confirmed GAS STSS (%) | Prognostic factor and outcome combination of interest reported                                                                                                                                                                                                                                                                                                                                                                                                                                                                                                                                        |
|------------------|--------------|---------------|----------------------|-------------|--------|----------------------------|--------------|---------------------------------------|-----------------------|------------------------|-------------------------------------------------------------------------------------------------------------------------------------------------------------------------------------------------------------------------------------------------------------------------------------------------------------------------------------------------------------------------------------------------------------------------------------------------------------------------------------------------------------------------------------------------------------------------------------------------------|
| Sriskandan 2000  | Cohort       | England       | 7                    | NR          | NR     | NR                         | NR           | NR                                    | NR                    | NR                     | other - other^                                                                                                                                                                                                                                                                                                                                                                                                                                                                                                                                                                                        |
| Stegmayr 1992    | Case-series  | Sweden        | 11                   | 42          | 64     | NR                         | NR           | NR                                    | 27                    | 73                     | age - clinical cure/improvement^<br>age - ICU admission^<br>age - mechanical ventilation^<br>age - mortality^<br>hemodialysis - clinical cure/improvement<br>hemodialysis - ICU admission<br>hemodialysis - mechanical ventilation<br>hemodialysis - mortality<br>IVIG - clinical cure/improvement<br>IVIG - ICU admission<br>IVIG - mechanical ventilation<br>IVIG - mortality<br>NF - clinical cure/improvement<br>NF - ICU admission<br>NF - mechanical ventilation<br>NF - mortality<br>sex - clinical cure/improvement<br>sex - ICU admission<br>sex - mechanical ventilation<br>sex - mortality |
| Stevens 1989     | Case-series  | United States | 19                   | 41          | 53     | 80                         | 5            | 21                                    | 0                     | 100                    | age - mortality^<br>emm type - mortality^<br>hemodialysis - mortality<br>NF - mortality<br>sex - mortality                                                                                                                                                                                                                                                                                                                                                                                                                                                                                            |
| Stockmann 2012   | Cohort       | United States | 53                   | 30 (median) | NR     | 58                         | 19           | 32                                    | NR                    | NR                     | age - ICU admission^<br>age - mortality                                                                                                                                                                                                                                                                                                                                                                                                                                                                                                                                                               |
| Tagini 2017      | Case-series  | Switzerland   | 5                    | 18          | 60     | NR                         | NR           | NR                                    | 20                    | 80                     | age - mortality^<br>emm type - mortality^<br>sex - mortality                                                                                                                                                                                                                                                                                                                                                                                                                                                                                                                                          |
| Zachariadou 2013 | Cohort       | Greece        | 19                   | NR          | NR     | NR                         | NR           | NR                                    | 0                     | 100                    | age - mortality<br>emm type - mortality^                                                                                                                                                                                                                                                                                                                                                                                                                                                                                                                                                              |

1  
2  
3  
4  
5  
6  
7  
8  
9  
10  
11  
12  
13  
14  
15  
16  
17  
18  
19  
20  
21  
22  
23  
24  
25  
26  
27  
28  
29  
30  
31  
32  
33  
34  
35  
36  
37  
38  
39  
40  
41  
42  
43  
44  
45  
46  
47

1  
2  
3  
4  
5  
6  
7  
8  
9  
10  
11  
12  
13  
14  
15  
16  
17  
18  
19  
20  
21  
22  
23  
24  
25  
26  
27  
28  
29  
30  
31  
32  
33  
34  
35  
36  
37  
38  
39  
40  
41  
42  
43  
44  
45  
46  
47

\*More than 80% of STSS cases due to group A *Streptococcus*  
^Excluded from meta-analysis  
NF=necrotizing fasciitis  
NSAIDs=non-steroidal anti-inflammatory drugs  
ICU=intensive care unit  
IVIG=intravenous immunoglobulin  
GAS=group A *Streptococcus*  
STSS=streptococcal toxic shock syndrome  
NR=not reported

For peer review only

### Risk of bias assessment of included studies

| Author                  | Study participation | Study Attrition | Prognostic Factor Measurement | Outcome Measurement | Study Confounding | Statistical Analysis and Presentation Summary | Overall Risk of Bias |
|-------------------------|---------------------|-----------------|-------------------------------|---------------------|-------------------|-----------------------------------------------|----------------------|
| Abuhammour 2004         | Low                 | Low             | Low                           | Low                 | High              | High                                          | High                 |
| Adalat 2014             | Low                 | High            | High                          | Low                 | High              | High                                          | High                 |
| Al-Ajmi 2012            | NA                  | NA              | NA                            | NA                  | NA                | NA                                            | High                 |
| Barnham 2002            | NA                  | NA              | NA                            | NA                  | NA                | NA                                            | High                 |
| Bernaldo de Quiros 1997 | Low                 | Low             | Low                           | Low                 | High              | High                                          | High                 |
| Brogan 1995             | NA                  | NA              | NA                            | NA                  | NA                | NA                                            | High                 |
| Butragueno Laiseca 2017 | NA                  | NA              | NA                            | NA                  | NA                | NA                                            | High                 |
| Carapetis 1995          | NA                  | NA              | NA                            | NA                  | NA                | NA                                            | High                 |
| Carapetis 2014          | Low                 | Low             | Low                           | Low                 | High              | High                                          | High                 |
| Cimolai 1992            | NA                  | NA              | NA                            | NA                  | NA                | NA                                            | High                 |
| Cook 2021               | Low                 | Low             | Low                           | Low                 | High              | High                                          | High                 |
| Cowan 1994              | NA                  | NA              | NA                            | NA                  | NA                | NA                                            | High                 |
| Crum 2004               | NA                  | NA              | NA                            | NA                  | NA                | NA                                            | High                 |
| Dahl 2002               | NA                  | NA              | NA                            | NA                  | NA                | NA                                            | High                 |
| Darenberg 2003          | Low                 | Moderate        | Low                           | Moderate            | Low               | Low                                           | Moderate             |
| Donaldson 1993          | NA                  | NA              | NA                            | NA                  | NA                | NA                                            | High                 |
| Erdem 2004              | NA                  | NA              | NA                            | NA                  | NA                | NA                                            | High                 |
| Eriksson 1999           | Low                 | Low             | Low                           | Low                 | High              | High                                          | High                 |
| Forni 1995              | NA                  | NA              | NA                            | NA                  | NA                | NA                                            | High                 |
| Fronhoffs 2000          | NA                  | NA              | NA                            | NA                  | NA                | NA                                            | High                 |
| Hasegawa 2004           | Low                 | Low             | Moderate                      | Low                 | High              | High                                          | High                 |
| Hayata 2021             | Low                 | Low             | Low                           | Low                 | High              | High                                          | High                 |
| Huang 2001              | NA                  | NA              | NA                            | NA                  | NA                | NA                                            | High                 |
| Kansal 2000             | Moderate            | Low             | Moderate                      | Low                 | High              | High                                          | High                 |
| Kaul 1999               | Low                 | Low             | Low                           | Low                 | High              | High                                          | High                 |

|                  |          |          |      |          |          |          |          |
|------------------|----------|----------|------|----------|----------|----------|----------|
| Linder 2017      | Low      | Moderate | Low  | Moderate | High     | High     | High     |
| Linner 2014      | Low      | Low      | Low  | Low      | Moderate | Low      | Low      |
| Luca-Harari 2009 | Low      | High     | Low  | Low      | High     | High     | High     |
| Nelson 2016      | Low      | Low      | Low  | Low      | High     | High     | High     |
| O'Loughlin 2007  | Low      | Low      | Low  | Low      | High     | High     | High     |
| Page 2011        | Low      | Low      | Low  | Low      | Moderate | High     | Moderate |
| Safar 2011       | Low      | Low      | Low  | Low      | High     | High     | High     |
| Schwartz 1992    | NA       | NA       | NA   | NA       | NA       | NA       | High     |
| Shah 2009        | Low      | High     | Low  | Low      | Moderate | Moderate | Moderate |
| Sriskandan 2000  | Moderate | Moderate | High | Low      | High     | High     | High     |
| Stegmayr 1992    | NA       | NA       | NA   | NA       | NA       | NA       | High     |
| Stevens 1989     | NA       | NA       | NA   | NA       | NA       | NA       | High     |
| Stockmann 2012   | Low      | Low      | Low  | Low      | High     | High     | High     |
| Tagini 2017      | NA       | NA       | NA   | NA       | NA       | NA       | High     |
| Zachariadou 2013 | Low      | Low      | Low  | Low      | High     | High     | High     |

NA, Not Applicable because case-series study design and rated at high risk of bias.

## Forest plots

**n<sub>e</sub>**: number of patients with the outcome exposed to or experiencing the prognostic factor (experimental group)

**N<sub>e</sub>**: total number of patients exposed to or experiencing the prognostic factor (experimental group)

**n<sub>c</sub>**: number of patients with the outcome not exposed to or experiencing the prognostic factor (control group)

**N<sub>c</sub>**: total number of patients not exposed to or experiencing the prognostic factor (control group)

Percentages in forest plots correspond to the percent weight contribution of each study in the meta-analysis.

For mortality, ICU admission and need for mechanical ventilation outcomes, an odds ratio greater than 1 corresponds with a worse STSS prognosis and an odds ratio less than 1 corresponds with a better STSS prognosis.

For clinical cure or improvement outcome, an odds ratio greater than 1 corresponds with a better STSS prognosis and an odds ratio less than 1 corresponds with a worse STSS prognosis.

For duration of hospitalization and ICU stay outcomes, a mean difference greater than 1 corresponds with a worse STSS prognosis and a mean difference less than 1 corresponds with a better STSS prognosis.

### Mortality

#### 1. Sex: male vs female (reference)

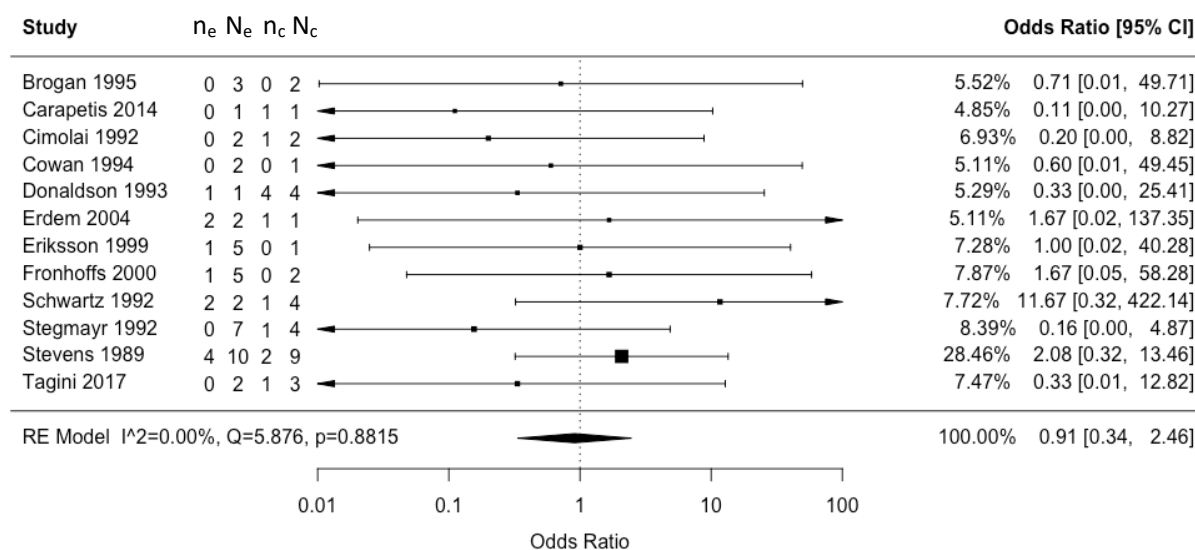

## 2.A) IVIG in all STSS patients: yes vs no (reference)

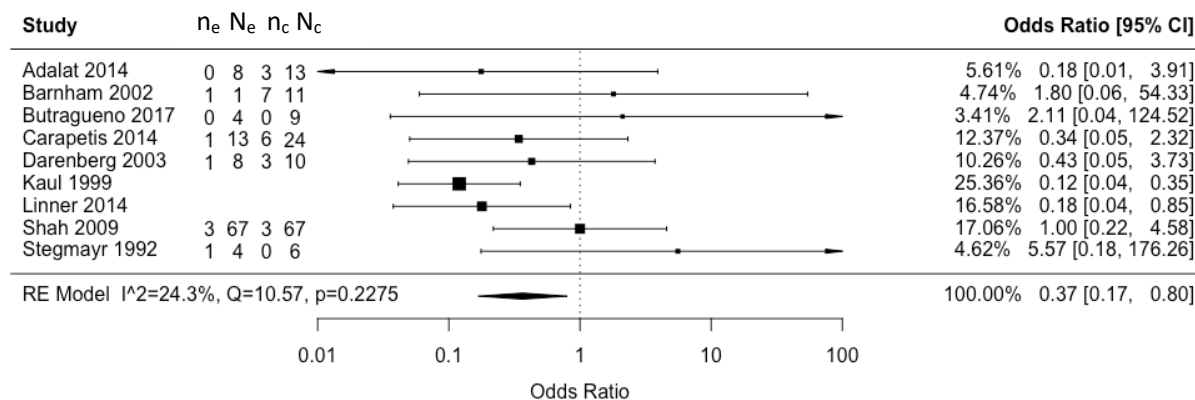

## 2.B) IVIG in the subset of STSS patients treated with clindamycin: yes vs no (reference)

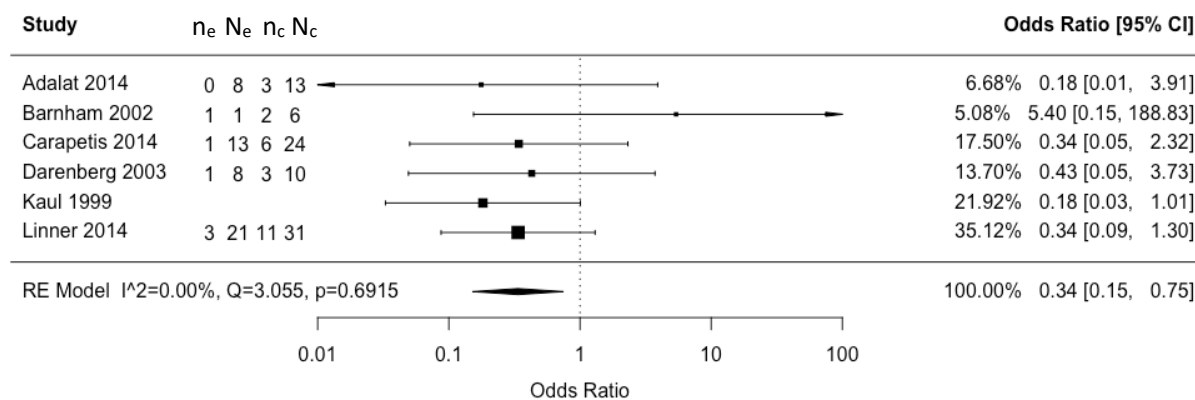

3. Any antibiotic: yes vs no (reference)

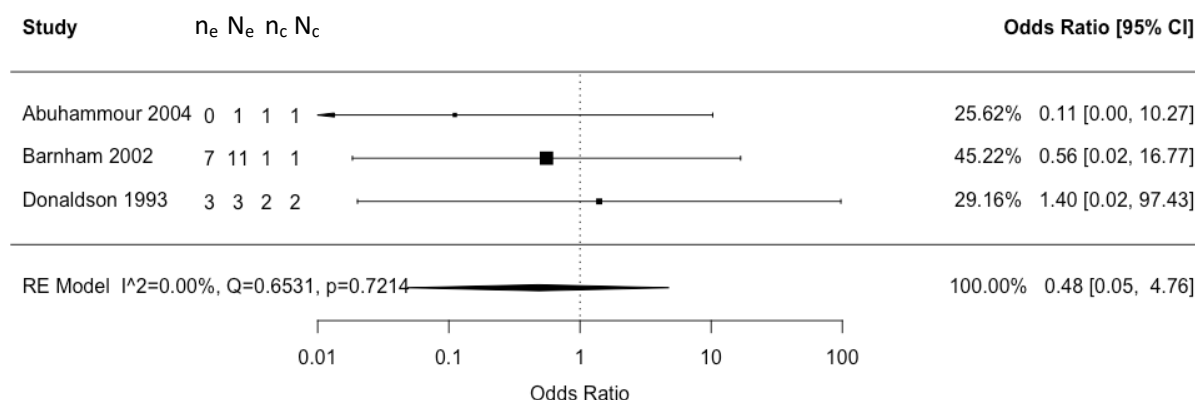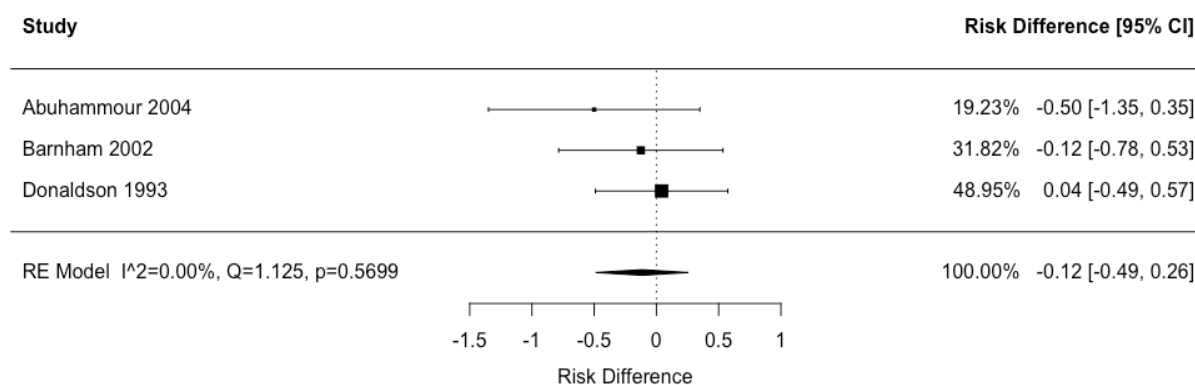

4. Necrotizing fasciitis: yes vs no (reference)

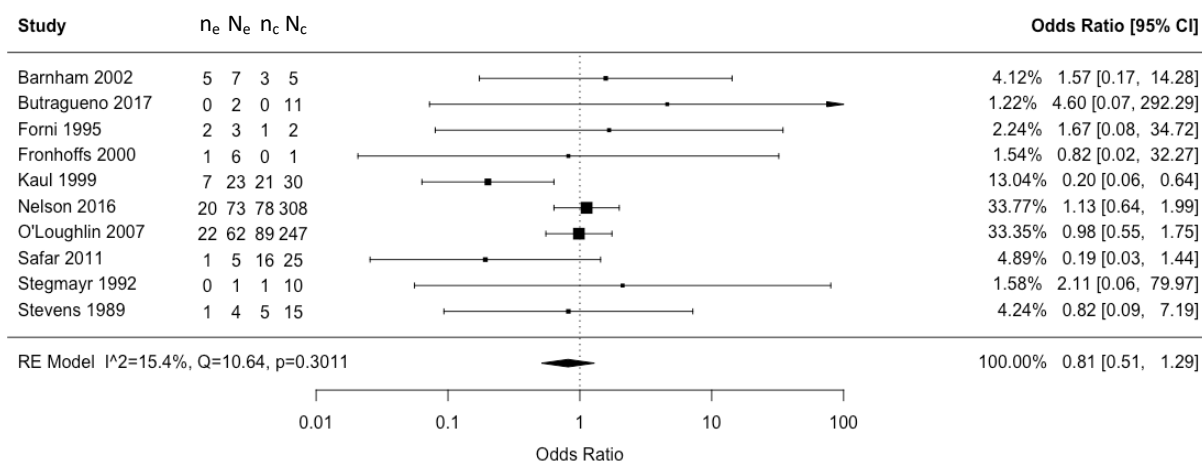



5. NSAIDs: yes vs no (reference)

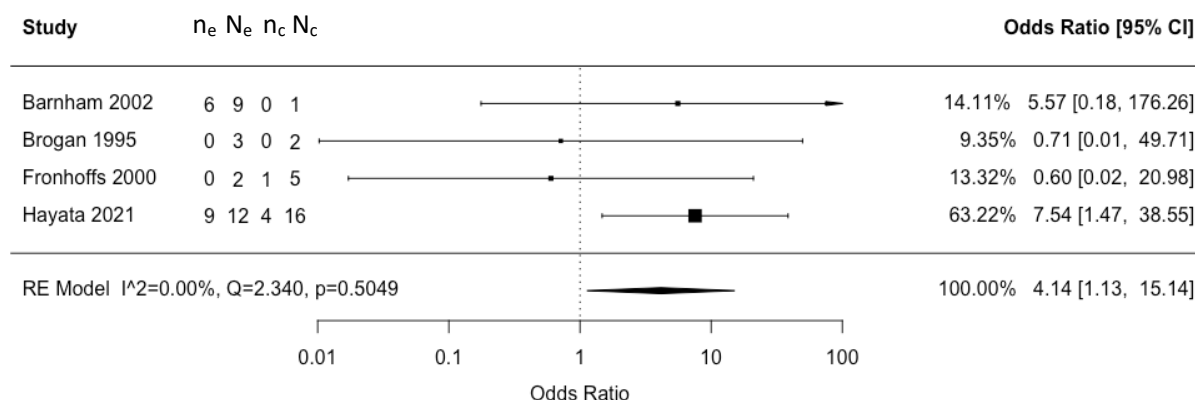

6. Immunocompromised: yes vs no (reference)

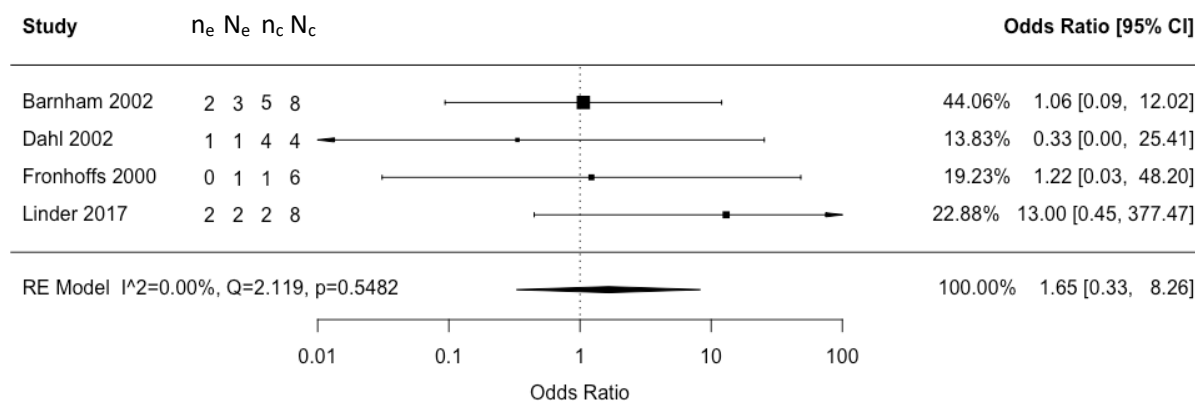

7. Age: <18 years vs 18-64 years (reference)

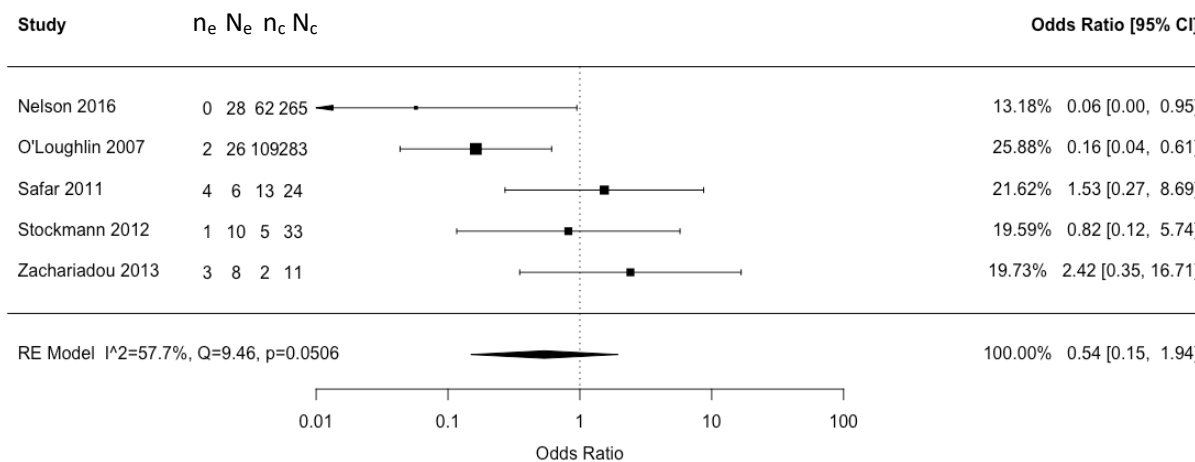

8. Age: ≥65 years vs <18 years (reference)

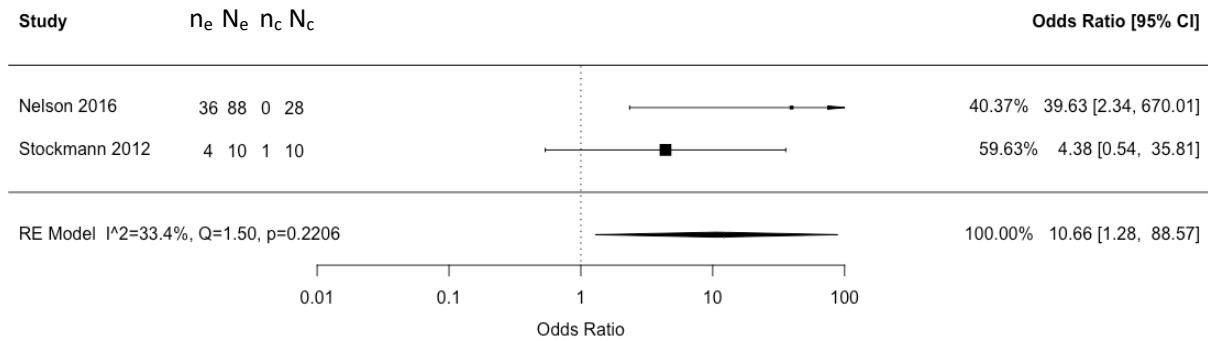

9: Age: ≥65 years vs 18-64 years (reference)

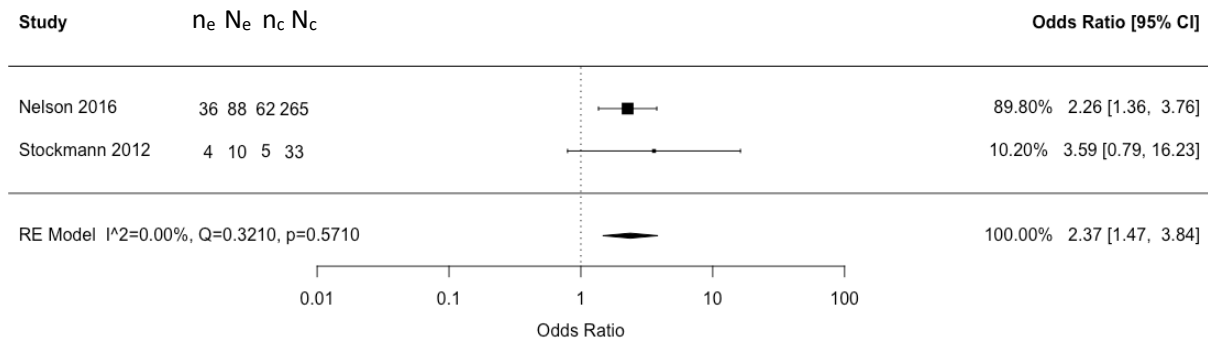

10. Clindamycin antibiotic vs no clindamycin antibiotic (reference)

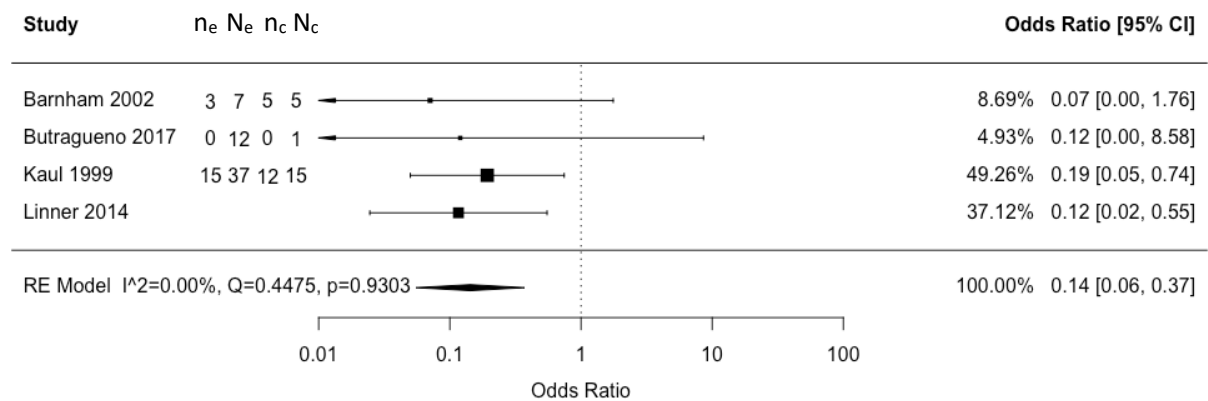

## 11. Acute renal failure: yes vs no (reference)

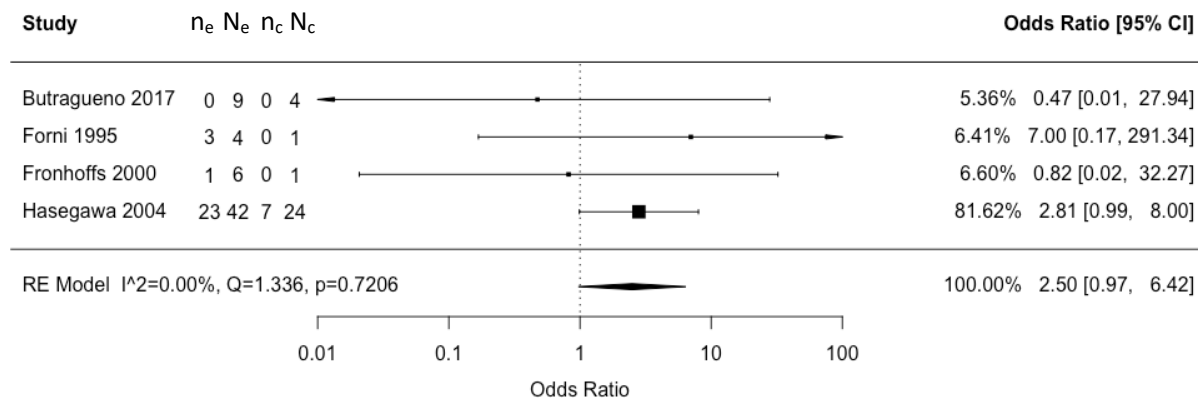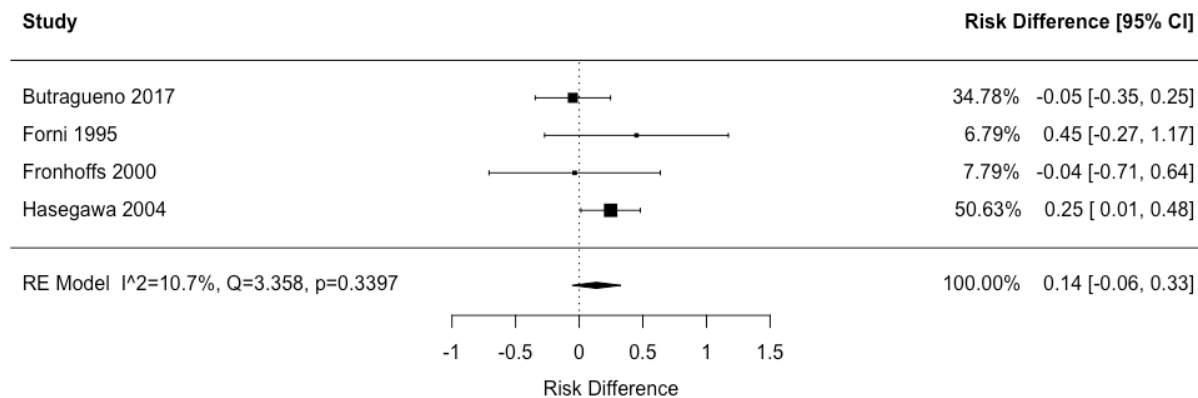

## 12. Hemodialysis: yes vs no (reference)

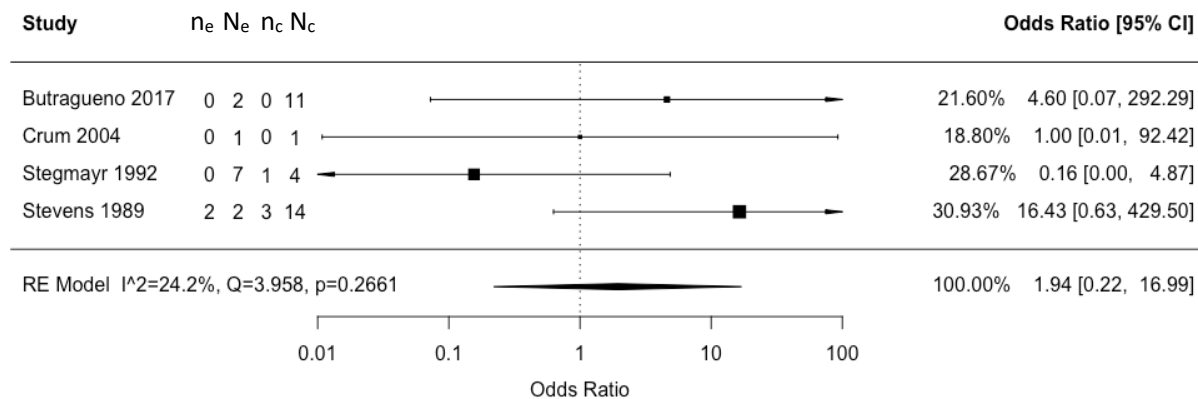

ICU admission

This note pertains to meta-analyses of the outcome ICU admission that include the study Stegmayr 1992. For this study, 10 of 11 STSS patients were admitted to the ICU. Despite no explicit mention of which one patient was not admitted to the ICU, our interpretation of the clinical profiles and patient-level data allowed us to deduce that patient 1 likely did not require ICU admission. We reached out to the corresponding author to confirm if our interpretation was correct, but did not receive a response.

1. Sex: male vs female (reference)

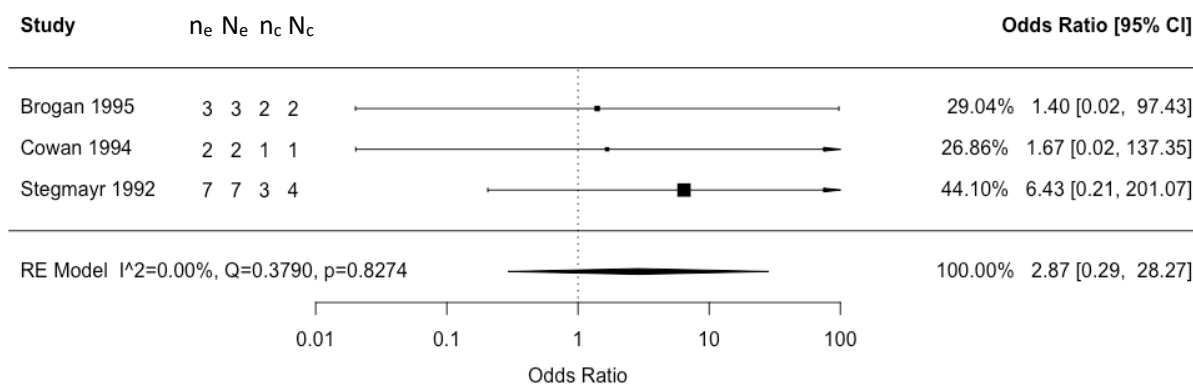

2. Any antibiotic: yes vs no (reference)

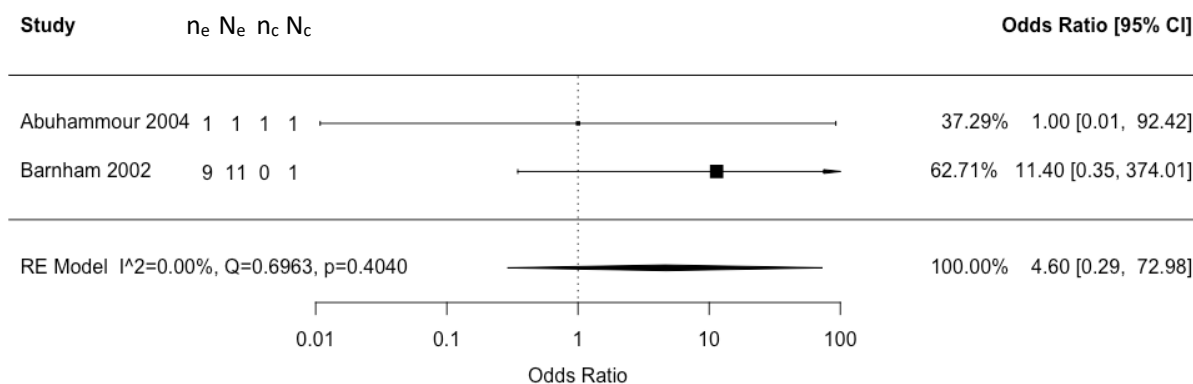

3. Necrotizing fasciitis: yes vs no (reference)

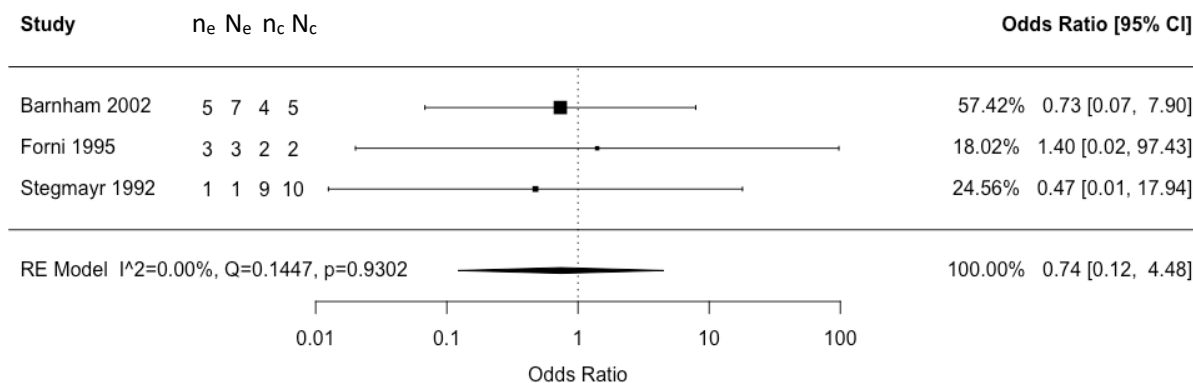

4. NSAIDs: yes vs no (reference)

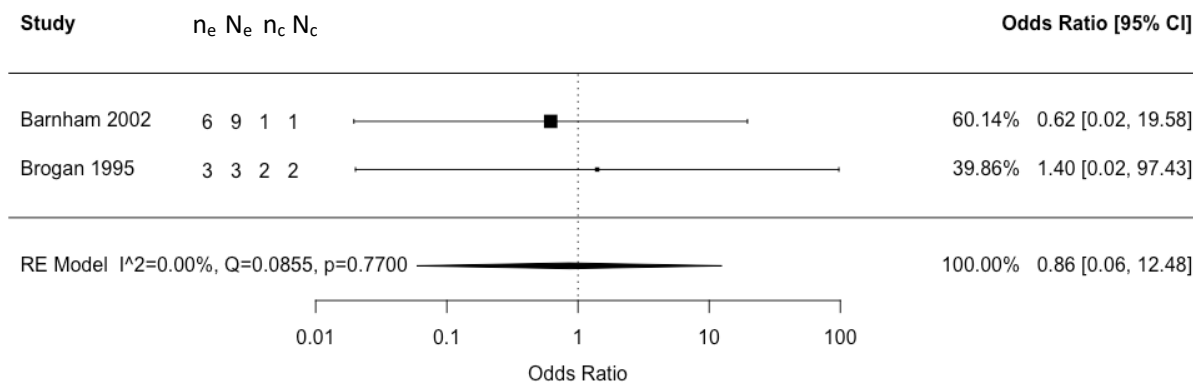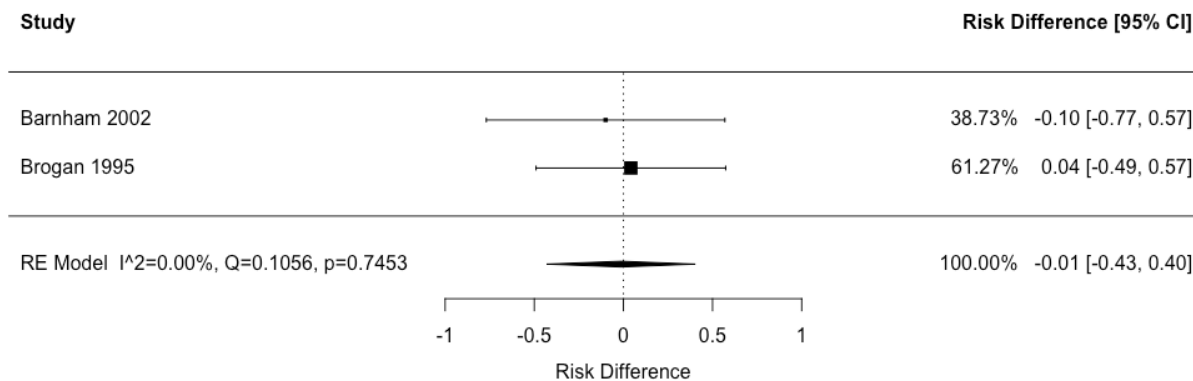

5. IVIG in all STSS patients: yes vs no (reference)

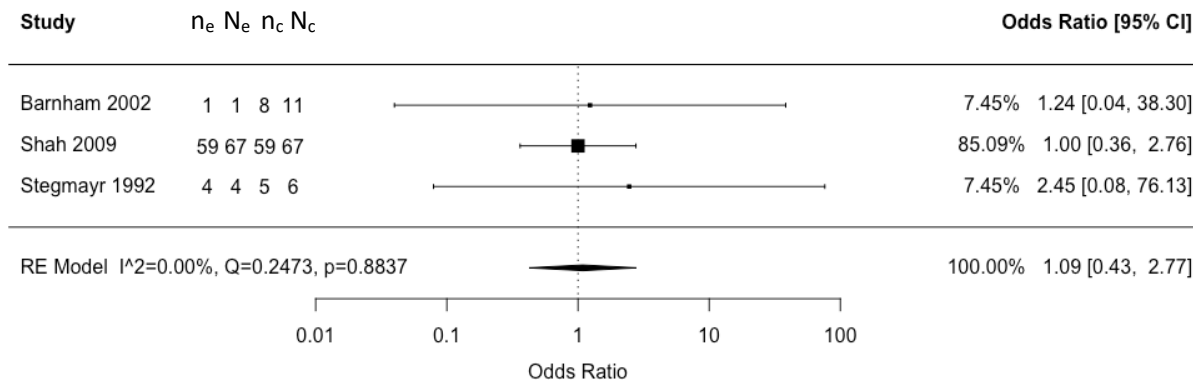

6. Hemodialysis: yes vs no (reference)



peer review only

Clinical cure or improvement

1. Sex: male vs female (reference)



2. IVIG in all STSS patients: yes vs no (reference)

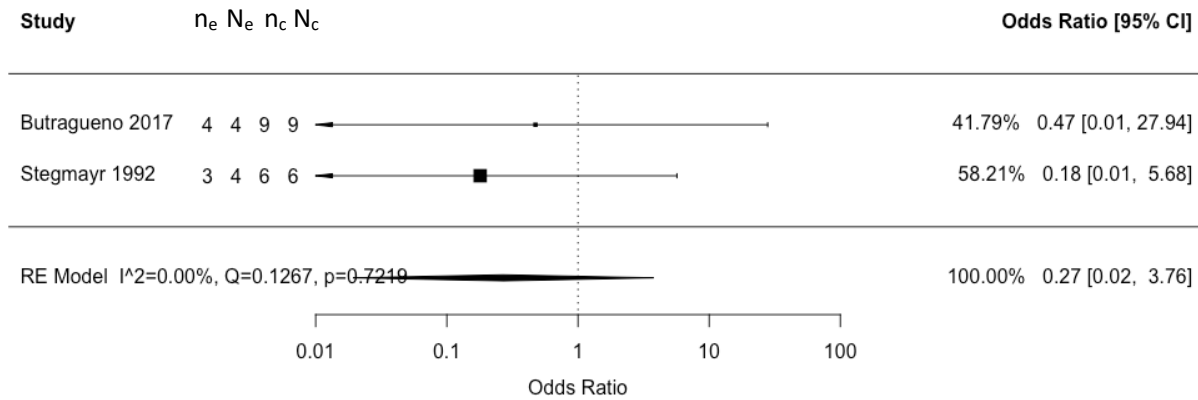



3. Necrotizing fasciitis: yes vs no (reference)

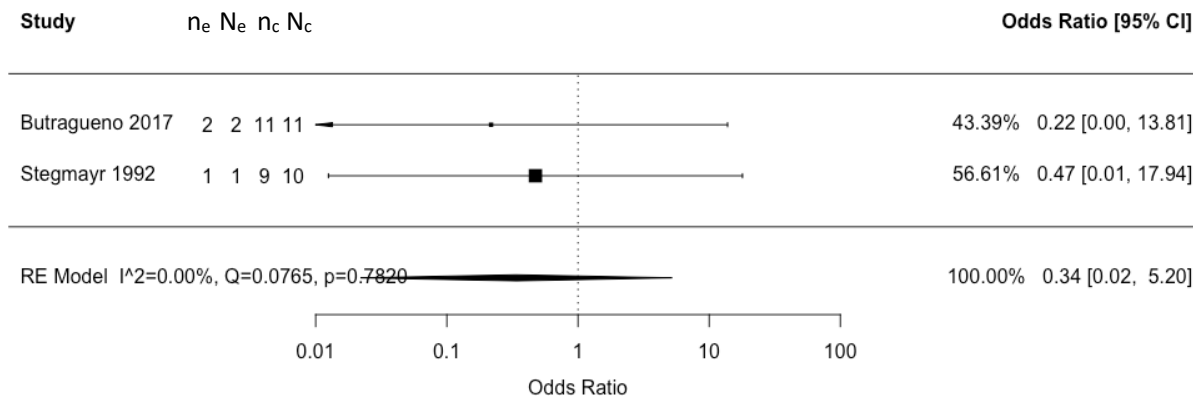

4. Hemodialysis: yes vs no (reference)

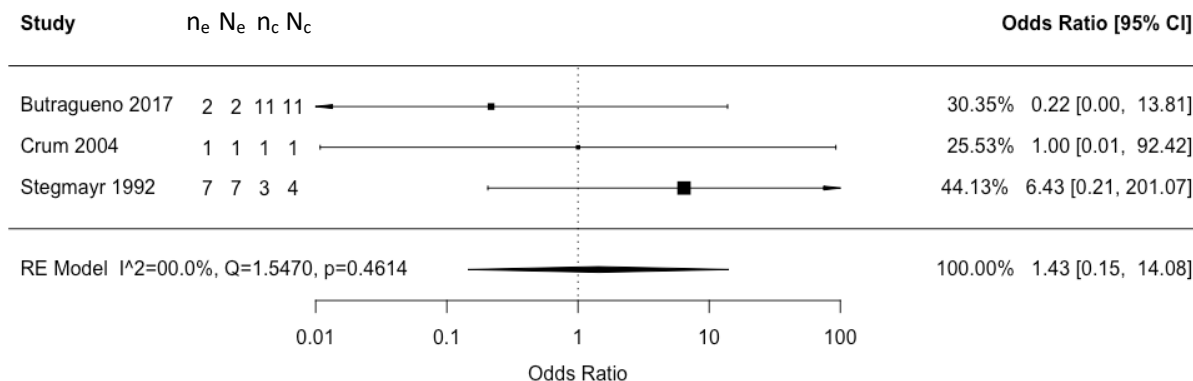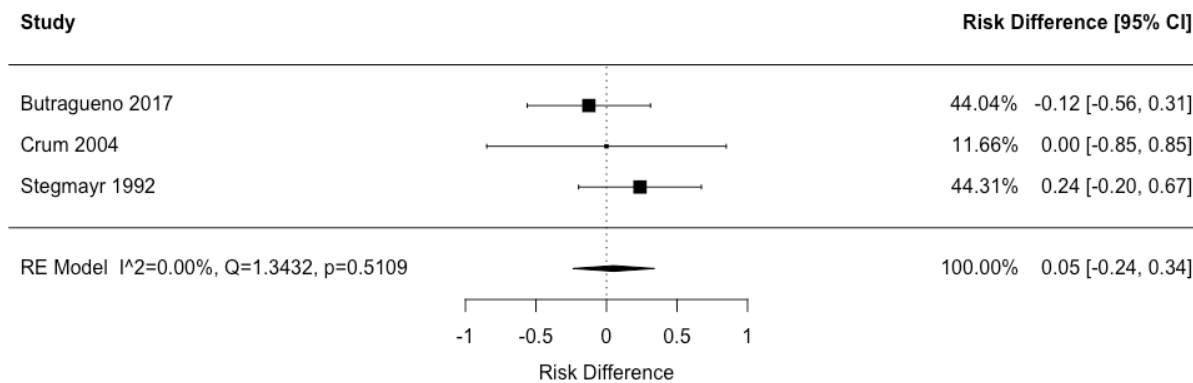

Mechanical ventilation

1. Sex: male vs female (reference)

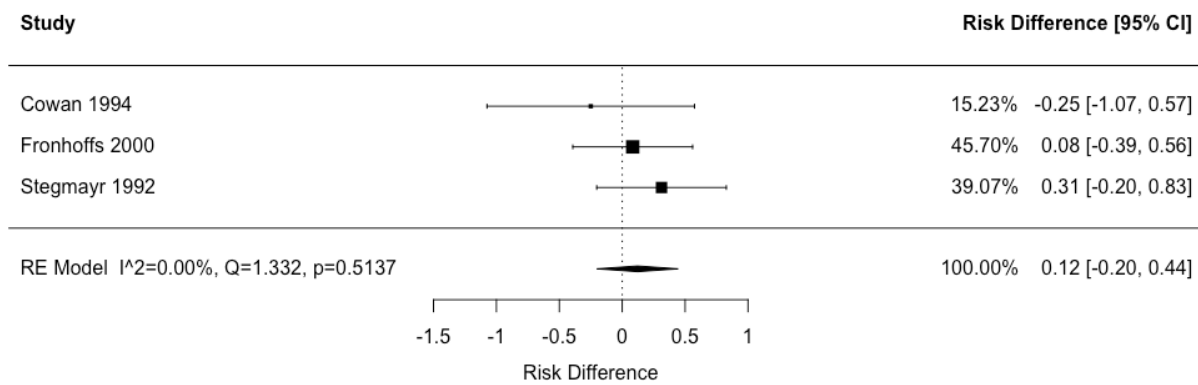

2. Acute renal failure: yes vs no (reference)



3. IVIG in all STSS patients: yes vs no (reference)

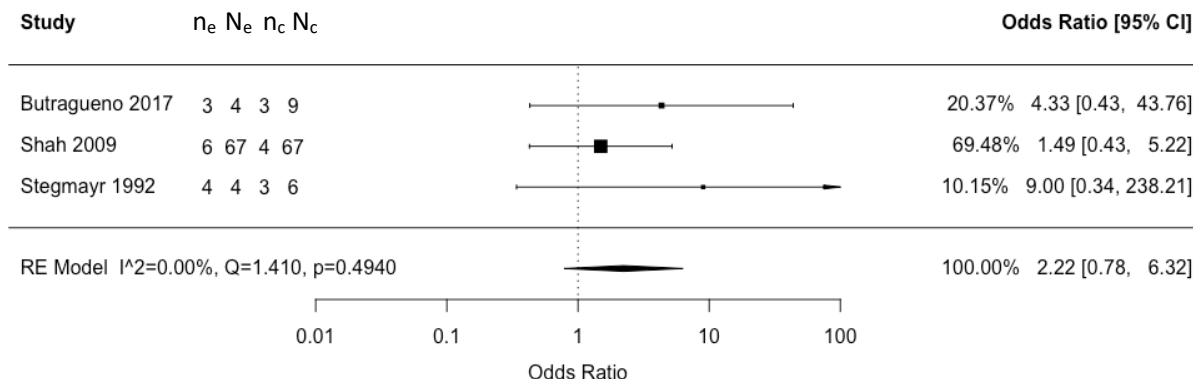

4. Necrotizing fasciitis: yes vs no (reference)

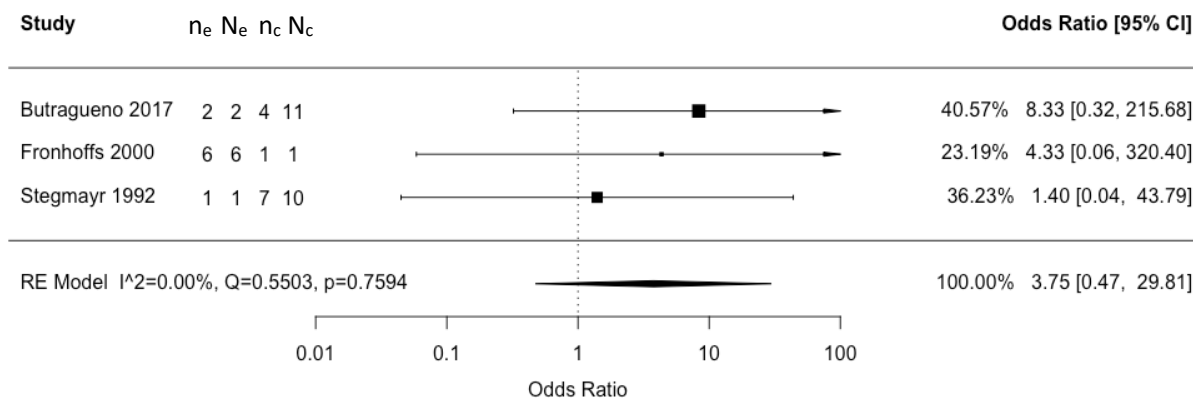

5. Hemodialysis: yes vs no (reference)

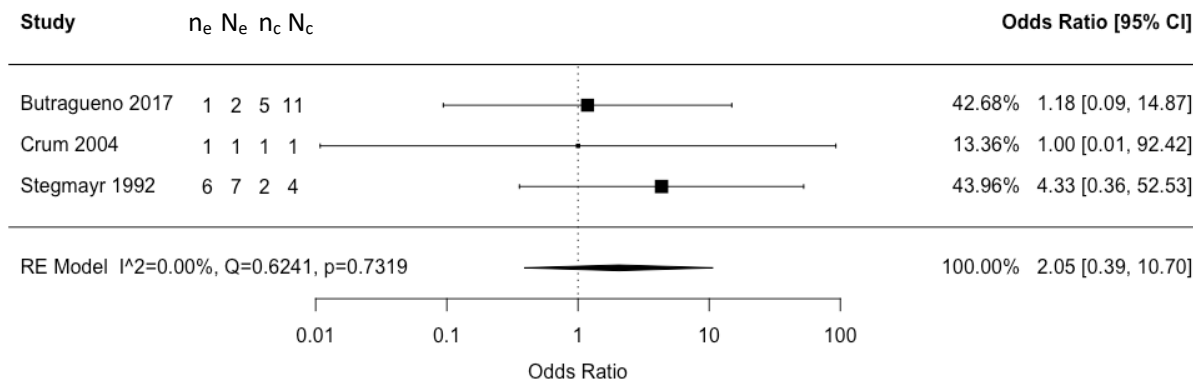

Hospital length-of-stay

1. IVIG: yes vs no (reference)

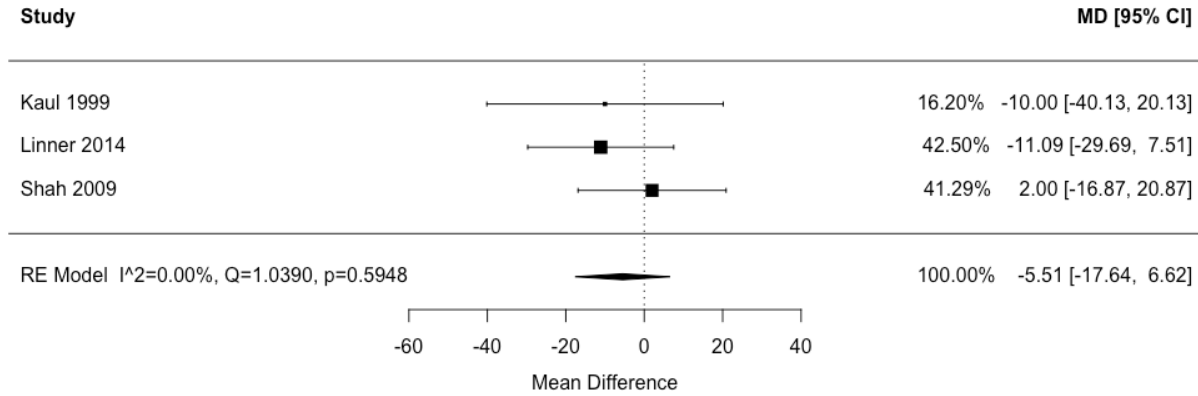

ICU length-of-stay

1. IVIG: yes vs no (reference)

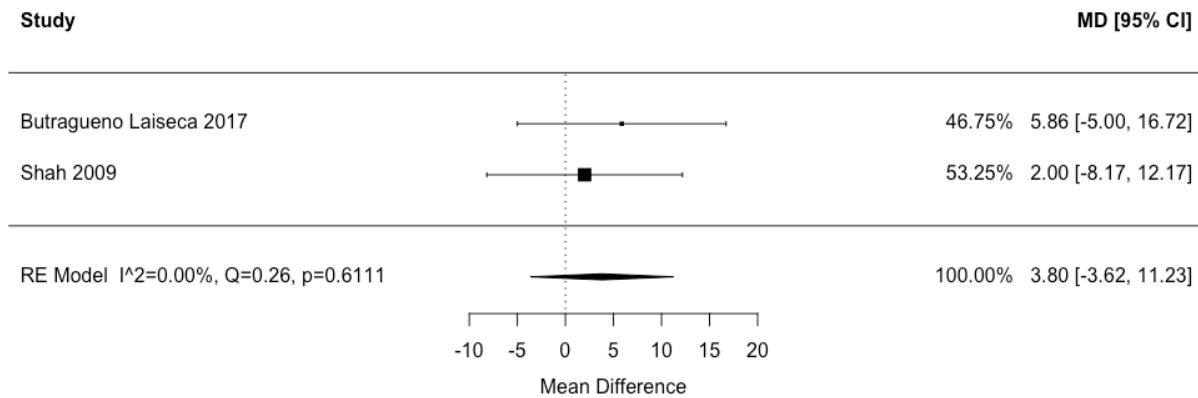

## Description of studies ineligible for meta-analysis by outcome

### Mortality

| Prognostic factor of interest        | N reporting | N analyzed | Reasons for exclusion from meta-analysis                                                                                                                      |
|--------------------------------------|-------------|------------|---------------------------------------------------------------------------------------------------------------------------------------------------------------|
| acute renal failure                  | 4           | 4          |                                                                                                                                                               |
| age                                  | 28          | 5          | n=17 case-series with <10 patients, precluding the aggregation of patient-level data; n=6 study population consisted of patients all within same age category |
| antibiotic                           | 3           | 3          |                                                                                                                                                               |
| clindamycin                          | 4           | 4          |                                                                                                                                                               |
| early hypotension                    | 0           | 0          |                                                                                                                                                               |
| emmtype                              | 7           | 0          | n=7 variability in reporting of molecular characteristics and comparators                                                                                     |
| hemodialysis                         | 4           | 4          |                                                                                                                                                               |
| immunocompromised                    | 5           | 4          | n=1 insufficient data for meta-analysis (only p value reported)                                                                                               |
| IVIG in all STSS patients            | 9           | 9          |                                                                                                                                                               |
| IVIG in clindamycin-treated patients | 6           | 6          |                                                                                                                                                               |
| NF                                   | 10          | 10         |                                                                                                                                                               |
| NSAIDs                               | 4           | 4          |                                                                                                                                                               |
| sex                                  | 12          | 12         |                                                                                                                                                               |
| timetoantibiotic                     | 1           | 0          | Meta-analysis precluded with only one study                                                                                                                   |

## (P)ICU admission

| Prognostic factor of interest        | N reporting | N analyzed | Reasons for exclusion from meta-analysis                                                                                                                                                                                                 |
|--------------------------------------|-------------|------------|------------------------------------------------------------------------------------------------------------------------------------------------------------------------------------------------------------------------------------------|
| acute renal failure                  | 1           | 0          | Meta-analysis precluded with only one study                                                                                                                                                                                              |
| age                                  | 9           | 0          | n=5 case-series with <10 patients, precluding the aggregation of patient-level data; n=3 study population consisted of patients all within same age category; n=1 eligible for analysis, but meta-analysis precluded with only one study |
| antibiotic                           | 2           | 2          |                                                                                                                                                                                                                                          |
| clindamycin                          | 1           | 0          | Meta-analysis precluded with only one study                                                                                                                                                                                              |
| early hypotension                    | 0           | 0          |                                                                                                                                                                                                                                          |
| emctype                              | 2           | 0          | n=2 variability in reporting of molecular characteristics and comparators                                                                                                                                                                |
| hemodialysis                         | 2           | 2          |                                                                                                                                                                                                                                          |
| immunocompromised                    | 1           | 0          | Meta-analysis precluded with only one study                                                                                                                                                                                              |
| IVIG in all STSS patients            | 3           | 3          |                                                                                                                                                                                                                                          |
| IVIG in clindamycin-treated patients | 0           | 0          |                                                                                                                                                                                                                                          |
| NF                                   | 3           | 3          |                                                                                                                                                                                                                                          |
| NSAIDs                               | 2           | 2          |                                                                                                                                                                                                                                          |
| sex                                  | 3           | 3          |                                                                                                                                                                                                                                          |
| timetoantibiotic                     | 0           | 0          |                                                                                                                                                                                                                                          |

## Clinical cure or improvement

| Prognostic factor of interest        | N reporting | N analyzed | Reasons for exclusion from meta-analysis                                                                                                                     |
|--------------------------------------|-------------|------------|--------------------------------------------------------------------------------------------------------------------------------------------------------------|
| acute renal failure                  | 1           | 0          | Meta-analysis precluded with only one study                                                                                                                  |
| age                                  | 8           | 0          | n=6 case-series with <10 patients, precluding the aggregation of patient-level data; n=2 study population consisted of patients all within same age category |
| antibiotic                           | 1           | 0          | Meta-analysis precluded with only one study                                                                                                                  |
| clindamycin                          | 1           | 0          | Meta-analysis precluded with only one study                                                                                                                  |
| earlyhypotension                     | 0           | 0          |                                                                                                                                                              |
| emctype                              | 0           | 0          |                                                                                                                                                              |
| hemodialysis                         | 3           | 3          |                                                                                                                                                              |
| immunocompromised                    | 0           | 0          |                                                                                                                                                              |
| IVIG in all STSS patients            | 2           | 2          |                                                                                                                                                              |
| IVIG in clindamycin-treated patients | 0           | 0          |                                                                                                                                                              |
| NF                                   | 2           | 2          |                                                                                                                                                              |
| NSAIDs                               | 1           | 0          | Meta-analysis precluded with only one study                                                                                                                  |
| sex                                  | 4           | 4          |                                                                                                                                                              |
| timetoantibiotic                     | 0           | 0          |                                                                                                                                                              |

## Mechanical ventilation

| Prognostic factor of interest        | N reporting | N analyzed | Reasons for exclusion from meta-analysis                                                                                                                     |
|--------------------------------------|-------------|------------|--------------------------------------------------------------------------------------------------------------------------------------------------------------|
| acute renal failure                  | 2           | 2          |                                                                                                                                                              |
| age                                  | 5           | 0          | n=3 case-series with <10 patients, precluding the aggregation of patient-level data; n=2 study population consisted of patients all within same age category |
| antibiotic                           | 0           | 0          |                                                                                                                                                              |
| clindamycin                          | 1           | 0          | Meta-analysis precluded with only one study                                                                                                                  |
| earlyhypotension                     | 0           | 0          |                                                                                                                                                              |
| emctype                              | 0           | 0          |                                                                                                                                                              |
| hemodialysis                         | 3           | 3          |                                                                                                                                                              |
| immunocompromised                    | 1           | 0          | Meta-analysis precluded with only one study                                                                                                                  |
| IVIG in all STSS patients            | 3           | 3          |                                                                                                                                                              |
| IVIG in clindamycin-treated patients | 0           | 0          |                                                                                                                                                              |
| NF                                   | 3           | 3          |                                                                                                                                                              |
| NSAIDs                               | 1           | 0          | Meta-analysis precluded with only one study                                                                                                                  |
| sex                                  | 3           | 3          |                                                                                                                                                              |
| timetoantibiotic                     | 0           | 0          |                                                                                                                                                              |

## Hospital length-of-stay

| Prognostic factor of interest        | N reporting | N analyzed | Reasons for exclusion from meta-analysis                                            |
|--------------------------------------|-------------|------------|-------------------------------------------------------------------------------------|
| acute renal failure                  | 0           | 0          |                                                                                     |
| age                                  | 2           | 0          | n=2 case-series with <10 patients, precluding the aggregation of patient-level data |
| antibiotic                           | 0           | 0          |                                                                                     |
| clindamycin                          | 0           | 0          |                                                                                     |
| early hypotension                    | 0           | 0          |                                                                                     |
| emctype                              | 0           | 0          |                                                                                     |
| hemodialysis                         | 0           | 0          |                                                                                     |
| immunocompromised                    | 0           | 0          |                                                                                     |
| IVIG in all STSS patients            | 3           | 3          |                                                                                     |
| IVIG in clindamycin-treated patients | 0           | 0          |                                                                                     |
| NF                                   | 0           | 0          |                                                                                     |
| NSAIDs                               | 1           | 0          | Meta-analysis precluded with only one study                                         |
| sex                                  | 1           | 0          | Meta-analysis precluded with only one study                                         |
| timetoantibiotic                     | 0           | 0          |                                                                                     |

## Duration of mechanical ventilation

| Prognostic factor of interest        | N reporting | N analyzed | Reasons for exclusion from meta-analysis    |
|--------------------------------------|-------------|------------|---------------------------------------------|
| acute renal failure                  | 0           | 0          |                                             |
| age                                  | 0           | 0          |                                             |
| antibiotic                           | 0           | 0          |                                             |
| clindamycin                          | 0           | 0          |                                             |
| early hypotension                    | 0           | 0          |                                             |
| emctype                              | 0           | 0          |                                             |
| hemodialysis                         | 0           | 0          |                                             |
| immunocompromised                    | 0           | 0          |                                             |
| IVIG in all STSS patients            | 1           | 0          | Meta-analysis precluded with only one study |
| IVIG in clindamycin-treated patients | 0           | 0          |                                             |
| NF                                   | 0           | 0          |                                             |
| NSAIDs                               | 0           | 0          |                                             |
| sex                                  | 0           | 0          |                                             |
| timetoantibiotic                     | 0           | 0          |                                             |



## ICU length-of-stay

| Prognostic factor of interest        | N reporting | N analyzed | Reasons for exclusion from meta-analysis                                                                                                                     |
|--------------------------------------|-------------|------------|--------------------------------------------------------------------------------------------------------------------------------------------------------------|
| acute renal failure                  | 0           | 0          |                                                                                                                                                              |
| age                                  | 3           | 0          | n=2 case-series with <10 patients, precluding the aggregation of patient-level data; n=1 study population consisted of patients all within same age category |
| antibiotic                           | 0           | 0          |                                                                                                                                                              |
| clindamycin                          | 1           | 0          | Meta-analysis precluded with only one study                                                                                                                  |
| early hypotension                    | 0           | 0          |                                                                                                                                                              |
| emctype                              | 0           | 0          |                                                                                                                                                              |
| hemodialysis                         | 0           | 0          |                                                                                                                                                              |
| immunocompromised                    | 0           | 0          |                                                                                                                                                              |
| IVIG in all STSS patients            | 2           | 2          |                                                                                                                                                              |
| IVIG in clindamycin-treated patients | 0           | 0          |                                                                                                                                                              |
| NF                                   | 1           | 0          | Meta-analysis precluded with only one study                                                                                                                  |
| NSAIDs                               | 1           | 0          | Meta-analysis precluded with only one study                                                                                                                  |
| sex                                  | 2           | 0          | n=1 study with one person in each group > cannot calculate mean; n=1 meta-analysis precluded with only one study                                             |
| timetoantibiotic                     | 0           | 0          |                                                                                                                                                              |

## Change in SOFA score from baseline

| Prognostic factor of interest        | N reporting | N analyzed | Reasons for exclusion from meta-analysis    |
|--------------------------------------|-------------|------------|---------------------------------------------|
| acute renal failure                  | 0           | 0          |                                             |
| age                                  | 0           | 0          |                                             |
| antibiotic                           | 0           | 0          |                                             |
| clindamycin                          | 0           | 0          |                                             |
| early hypotension                    | 0           | 0          |                                             |
| emctype                              | 0           | 0          |                                             |
| hemodialysis                         | 0           | 0          |                                             |
| immunocompromised                    | 0           | 0          |                                             |
| IVIG in all STSS patients            | 1           | 0          | Meta-analysis precluded with only one study |
| IVIG in clindamycin-treated patients | 0           | 0          |                                             |
| NF                                   | 0           | 0          |                                             |
| NSAIDs                               | 0           | 0          |                                             |
| sex                                  | 0           | 0          |                                             |
| timetoantibiotic                     | 0           | 0          |                                             |

## Functional status

| Prognostic factor of interest        | N reporting | N analyzed | Reasons for exclusion from meta-analysis |
|--------------------------------------|-------------|------------|------------------------------------------|
| acute renal failure                  | 0           | 0          |                                          |
| age                                  | 0           | 0          |                                          |
| antibiotic                           | 0           | 0          |                                          |
| clindamycin                          | 0           | 0          |                                          |
| early hypotension                    | 0           | 0          |                                          |
| emctype                              | 0           | 0          |                                          |
| hemodialysis                         | 0           | 0          |                                          |
| immunocompromised                    | 0           | 0          |                                          |
| IVIG in all STSS patients            | 0           | 0          |                                          |
| IVIG in clindamycin-treated patients | 0           | 0          |                                          |
| NF                                   | 0           | 0          |                                          |
| NSAIDs                               | 0           | 0          |                                          |
| sex                                  | 0           | 0          |                                          |
| timetoantibiotic                     | 0           | 0          |                                          |

## Health related quality of life

| Prognostic factor of interest        | N reporting | N analyzed | Reasons for exclusion from meta-analysis |
|--------------------------------------|-------------|------------|------------------------------------------|
| acute renal failure                  | 0           | 0          |                                          |
| age                                  | 0           | 0          |                                          |
| antibiotic                           | 0           | 0          |                                          |
| clindamycin                          | 0           | 0          |                                          |
| early hypotension                    | 0           | 0          |                                          |
| emctype                              | 0           | 0          |                                          |
| hemodialysis                         | 0           | 0          |                                          |
| immunocompromised                    | 0           | 0          |                                          |
| IVIG in all STSS patients            | 0           | 0          |                                          |
| IVIG in clindamycin-treated patients | 0           | 0          |                                          |
| NF                                   | 0           | 0          |                                          |
| NSAIDs                               | 0           | 0          |                                          |
| sex                                  | 0           | 0          |                                          |
| timetoantibiotic                     | 0           | 0          |                                          |

## Cost

| Prognostic factor of interest        | N reporting | N analyzed | Reasons for exclusion from meta-analysis    |
|--------------------------------------|-------------|------------|---------------------------------------------|
| acute renal failure                  | 0           | 0          |                                             |
| age                                  | 0           | 0          |                                             |
| antibiotic                           | 0           | 0          |                                             |
| clindamycin                          | 0           | 0          |                                             |
| early hypotension                    | 0           | 0          |                                             |
| emctype                              | 0           | 0          |                                             |
| hemodialysis                         | 0           | 0          |                                             |
| immunocompromised                    | 0           | 0          |                                             |
| IVIG in all STSS patients            | 1           | 0          | Meta-analysis precluded with only one study |
| IVIG in clindamycin-treated patients | 0           | 0          |                                             |
| NF                                   | 0           | 0          |                                             |
| NSAIDs                               | 0           | 0          |                                             |
| sex                                  | 0           | 0          |                                             |
| timetoantibiotic                     | 0           | 0          |                                             |

## Time to mortality

| Prognostic factor of interest        | N reporting | N analyzed | Reasons for exclusion from meta-analysis                                                                         |
|--------------------------------------|-------------|------------|------------------------------------------------------------------------------------------------------------------|
| acute renal failure                  | 0           | 0          |                                                                                                                  |
| age                                  | 0           | 0          |                                                                                                                  |
| antibiotic                           | 0           | 0          |                                                                                                                  |
| clindamycin                          | 0           | 0          |                                                                                                                  |
| early hypotension                    | 0           | 0          |                                                                                                                  |
| emctype                              | 0           | 0          |                                                                                                                  |
| hemodialysis                         | 0           | 0          |                                                                                                                  |
| immunocompromised                    | 0           | 0          |                                                                                                                  |
| IVIG in all STSS patients            | 2           | 0          | n=1 study with one person in each group > cannot calculate mean; n=1 meta-analysis precluded with only one study |
| IVIG in clindamycin-treated patients | 2           | 0          | n=1 study with one person in each group > cannot calculate mean; n=1 meta-analysis precluded with only one study |
| NF                                   | 0           | 0          |                                                                                                                  |
| NSAIDs                               | 0           | 0          |                                                                                                                  |
| sex                                  | 0           | 0          |                                                                                                                  |
| timetoantibiotic                     | 0           | 0          |                                                                                                                  |

## Time to clinical improvement or resolution of shock

| Prognostic factor of interest        | N reporting | N analyzed | Reasons for exclusion from meta-analysis    |
|--------------------------------------|-------------|------------|---------------------------------------------|
| acute renal failure                  | 0           | 0          |                                             |
| age                                  | 0           | 0          |                                             |
| antibiotic                           | 0           | 0          |                                             |
| clindamycin                          | 0           | 0          |                                             |
| early hypotension                    | 0           | 0          |                                             |
| emctype                              | 0           | 0          |                                             |
| hemodialysis                         | 0           | 0          |                                             |
| immunocompromised                    | 0           | 0          |                                             |
| IVIG in all STSS patients            | 1           | 0          | Meta-analysis precluded with only one study |
| IVIG in clindamycin-treated patients | 1           | 0          | Meta-analysis precluded with only one study |
| NF                                   | 0           | 0          |                                             |
| NSAIDs                               | 0           | 0          |                                             |
| sex                                  | 0           | 0          |                                             |
| timetoantibiotic                     | 0           | 0          |                                             |

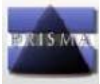

## PRISMA 2020 Checklist

| Section and Topic             | Item # | Checklist item                                                                                                                                                                                                                                                                                       | Location where item is reported |
|-------------------------------|--------|------------------------------------------------------------------------------------------------------------------------------------------------------------------------------------------------------------------------------------------------------------------------------------------------------|---------------------------------|
| <b>TITLE</b>                  |        |                                                                                                                                                                                                                                                                                                      |                                 |
| Title                         | 1      | Identify the report as a systematic review.                                                                                                                                                                                                                                                          | 1                               |
| <b>ABSTRACT</b>               |        |                                                                                                                                                                                                                                                                                                      |                                 |
| Abstract                      | 2      | See the PRISMA 2020 for Abstracts checklist.                                                                                                                                                                                                                                                         | 2                               |
| <b>INTRODUCTION</b>           |        |                                                                                                                                                                                                                                                                                                      |                                 |
| Rationale                     | 3      | Describe the rationale for the review in the context of existing knowledge.                                                                                                                                                                                                                          | 4                               |
| Objectives                    | 4      | Provide an explicit statement of the objective(s) or question(s) the review addresses.                                                                                                                                                                                                               | 4                               |
| <b>METHODS</b>                |        |                                                                                                                                                                                                                                                                                                      |                                 |
| Eligibility criteria          | 5      | Specify the inclusion and exclusion criteria for the review and how studies were grouped for the syntheses.                                                                                                                                                                                          | 4-9                             |
| Information sources           | 6      | Specify all databases, registers, websites, organisations, reference lists and other sources searched or consulted to identify studies. Specify the date when each source was last searched or consulted.                                                                                            | 4-9                             |
| Search strategy               | 7      | Present the full search strategies for all databases, registers and websites, including any filters and limits used.                                                                                                                                                                                 | 4-9                             |
| Selection process             | 8      | Specify the methods used to decide whether a study met the inclusion criteria of the review, including how many reviewers screened each record and each report retrieved, whether they worked independently, and if applicable, details of automation tools used in the process.                     | 4-9                             |
| Data collection process       | 9      | Specify the methods used to collect data from reports, including how many reviewers collected data from each report, whether they worked independently, any processes for obtaining or confirming data from study investigators, and if applicable, details of automation tools used in the process. | 4-9                             |
| Data items                    | 10a    | List and define all outcomes for which data were sought. Specify whether all results that were compatible with each outcome domain in each study were sought (e.g. for all measures, time points, analyses), and if not, the methods used to decide which results to collect.                        | 4-9                             |
|                               | 10b    | List and define all other variables for which data were sought (e.g. participant and intervention characteristics, funding sources). Describe any assumptions made about any missing or unclear information.                                                                                         | 4-9                             |
| Study risk of bias assessment | 11     | Specify the methods used to assess risk of bias in the included studies, including details of the tool(s) used, how many reviewers assessed each study and whether they worked independently, and if applicable, details of automation tools used in the process.                                    | 4-9                             |
| Effect measures               | 12     | Specify for each outcome the effect measure(s) (e.g. risk ratio, mean difference) used in the synthesis or presentation of results.                                                                                                                                                                  | 4-9                             |
| Synthesis methods             | 13a    | Describe the processes used to decide which studies were eligible for each synthesis (e.g. tabulating the study intervention characteristics and comparing against the planned groups for each synthesis (item #5)).                                                                                 | 4-9                             |
|                               | 13b    | Describe any methods required to prepare the data for presentation or synthesis, such as handling of missing summary statistics, or data conversions.                                                                                                                                                | 4-9                             |
|                               | 13c    | Describe any methods used to tabulate or visually display results of individual studies and syntheses.                                                                                                                                                                                               | 4-9                             |
|                               | 13d    | Describe any methods used to synthesize results and provide a rationale for the choice(s). If meta-analysis was performed, describe the model(s), method(s) to identify the presence and extent of statistical heterogeneity, and software package(s) used.                                          | 4-9                             |
|                               | 13e    | Describe any methods used to explore possible causes of heterogeneity among study results (e.g. subgroup analysis, meta-regression).                                                                                                                                                                 | 4-9                             |
|                               | 13f    | Describe any sensitivity analyses conducted to assess robustness of the synthesized results.                                                                                                                                                                                                         | 4-9                             |
| Reporting bias assessment     | 14     | Describe any methods used to assess risk of bias due to missing results in a synthesis (arising from reporting biases).                                                                                                                                                                              | 4-9                             |
| Certainty                     | 15     | Describe any methods used to assess certainty (or confidence) in the body of evidence for an outcome.                                                                                                                                                                                                | 4-9                             |

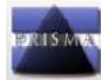

## PRISMA 2020 Checklist

| Section and Topic                              | Item # | Checklist item                                                                                                                                                                                                                                                                       | Location where item is reported |
|------------------------------------------------|--------|--------------------------------------------------------------------------------------------------------------------------------------------------------------------------------------------------------------------------------------------------------------------------------------|---------------------------------|
| assessment                                     |        |                                                                                                                                                                                                                                                                                      |                                 |
| <b>RESULTS</b>                                 |        |                                                                                                                                                                                                                                                                                      |                                 |
| Study selection                                | 16a    | Describe the results of the search and selection process, from the number of records identified in the search to the number of studies included in the review, ideally using a flow diagram.                                                                                         | 9-17                            |
|                                                | 16b    | Cite studies that might appear to meet the inclusion criteria, but which were excluded, and explain why they were excluded.                                                                                                                                                          | 9-17                            |
| Study characteristics                          | 17     | Cite each included study and present its characteristics.                                                                                                                                                                                                                            | 9-17                            |
| Risk of bias in studies                        | 18     | Present assessments of risk of bias for each included study.                                                                                                                                                                                                                         | 9-17                            |
| Results of individual studies                  | 19     | For all outcomes, present, for each study: (a) summary statistics for each group (where appropriate) and (b) an effect estimate and its precision (e.g. confidence/credible interval), ideally using structured tables or plots.                                                     | 9-17                            |
| Results of syntheses                           | 20a    | For each synthesis, briefly summarise the characteristics and risk of bias among contributing studies.                                                                                                                                                                               | 9-17                            |
|                                                | 20b    | Present results of all statistical syntheses conducted. If meta-analysis was done, present for each the summary estimate and its precision (e.g. confidence/credible interval) and measures of statistical heterogeneity. If comparing groups, describe the direction of the effect. | 9-17                            |
|                                                | 20c    | Present results of all investigations of possible causes of heterogeneity among study results.                                                                                                                                                                                       | 9-17                            |
|                                                | 20d    | Present results of all sensitivity analyses conducted to assess the robustness of the synthesized results.                                                                                                                                                                           | 9-17                            |
| Reporting biases                               | 21     | Present assessments of risk of bias due to missing results (arising from reporting biases) for each synthesis assessed.                                                                                                                                                              | 9-17                            |
| Certainty of evidence                          | 22     | Present assessments of certainty (or confidence) in the body of evidence for each outcome assessed.                                                                                                                                                                                  | 9-17                            |
| <b>DISCUSSION</b>                              |        |                                                                                                                                                                                                                                                                                      |                                 |
| Discussion                                     | 23a    | Provide a general interpretation of the results in the context of other evidence.                                                                                                                                                                                                    | 17-19                           |
|                                                | 23b    | Discuss any limitations of the evidence included in the review.                                                                                                                                                                                                                      | 17-19                           |
|                                                | 23c    | Discuss any limitations of the review processes used.                                                                                                                                                                                                                                | 17-19                           |
|                                                | 23d    | Discuss implications of the results for practice, policy, and future research.                                                                                                                                                                                                       | 17-19                           |
| <b>OTHER INFORMATION</b>                       |        |                                                                                                                                                                                                                                                                                      |                                 |
| Registration and protocol                      | 24a    | Provide registration information for the review, including register name and registration number, or state that the review was not registered.                                                                                                                                       | 4                               |
|                                                | 24b    | Indicate where the review protocol can be accessed, or state that a protocol was not prepared.                                                                                                                                                                                       | 4                               |
|                                                | 24c    | Describe and explain any amendments to information provided at registration or in the protocol.                                                                                                                                                                                      | 4                               |
| Support                                        | 25     | Describe sources of financial or non-financial support for the review, and the role of the funders or sponsors in the review.                                                                                                                                                        | 20                              |
| Competing interests                            | 26     | Declare any competing interests of review authors.                                                                                                                                                                                                                                   | 20                              |
| Availability of data, code and other materials | 27     | Report which of the following are publicly available and where they can be found: template data collection forms; data extracted from included studies; data used for all analyses; analytic code; any other materials used in the review.                                           | 21                              |

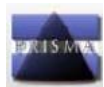

## PRISMA 2020 Checklist

- 1
- 2
- 3
- 4
- 5
- 6
- 7
- 8
- 9
- 10
- 11
- 12
- 13
- 14
- 15
- 16
- 17
- 18
- 19
- 20
- 21
- 22
- 23
- 24
- 25
- 26
- 27
- 28
- 29
- 30
- 31
- 32
- 33
- 34
- 35
- 36
- 37
- 38
- 39
- 40
- 41
- 42
- 43
- 44
- 45
- 46
- 47

10.1136/bmj.n71

For more information, visit: <http://www.prisma-statement.org/>

For peer review only



## MOOSE (Meta-analyses Of Observational Studies in Epidemiology) Checklist

A reporting checklist for Authors, Editors, and Reviewers of Meta-analyses of Observational Studies. You must report the page number in your manuscript where you consider each of the items listed in this checklist. If you have not included this information, either revise your manuscript accordingly before submitting or note N/A.

| Reporting Criteria                                                                                              | Reported (Yes/No) | Reported on Page No. |
|-----------------------------------------------------------------------------------------------------------------|-------------------|----------------------|
| <b>Reporting of Background</b>                                                                                  |                   |                      |
| Problem definition                                                                                              |                   |                      |
| Hypothesis statement                                                                                            |                   |                      |
| Description of Study Outcome(s)                                                                                 |                   |                      |
| Type of exposure or intervention used                                                                           |                   |                      |
| Type of study design used                                                                                       |                   |                      |
| Study population                                                                                                |                   |                      |
| <b>Reporting of Search Strategy</b>                                                                             |                   |                      |
| Qualifications of searchers (eg, librarians and investigators)                                                  |                   |                      |
| Search strategy, including time period included in the synthesis and keywords                                   |                   |                      |
| Effort to include all available studies, including contact with authors                                         |                   |                      |
| Databases and registries searched                                                                               |                   |                      |
| Search software used, name and version, including special features used (eg, explosion)                         |                   |                      |
| Use of hand searching (eg, reference lists of obtained articles)                                                |                   |                      |
| List of citations located and those excluded, including justification                                           |                   |                      |
| Method for addressing articles published in languages other than English                                        |                   |                      |
| Method of handling abstracts and unpublished studies                                                            |                   |                      |
| Description of any contact with authors                                                                         |                   |                      |
| <b>Reporting of Methods</b>                                                                                     |                   |                      |
| Description of relevance or appropriateness of studies assembled for assessing the hypothesis to be tested      |                   |                      |
| Rationale for the selection and coding of data (eg, sound clinical principles or convenience)                   |                   |                      |
| Documentation of how data were classified and coded (eg, multiple raters, blinding, and interrater reliability) |                   |                      |
| Assessment of confounding (eg, comparability of cases and controls in studies where appropriate)                |                   |                      |

| Reporting Criteria                                                                                                                                                                                                                                                           | Reported (Yes/No) | Reported on Page No. |
|------------------------------------------------------------------------------------------------------------------------------------------------------------------------------------------------------------------------------------------------------------------------------|-------------------|----------------------|
| Assessment of study quality, including blinding of quality assessors; stratification or regression on possible predictors of study results                                                                                                                                   |                   |                      |
| Assessment of heterogeneity                                                                                                                                                                                                                                                  |                   |                      |
| Description of statistical methods (eg, complete description of fixed or random effects models, justification of whether the chosen models account for predictors of study results, dose-response models, or cumulative meta-analysis) in sufficient detail to be replicated |                   |                      |
| Provision of appropriate tables and graphics                                                                                                                                                                                                                                 |                   |                      |
| <b>Reporting of Results</b>                                                                                                                                                                                                                                                  |                   |                      |
| Table giving descriptive information for each study included                                                                                                                                                                                                                 |                   |                      |
| Results of sensitivity testing (eg, subgroup analysis)                                                                                                                                                                                                                       |                   |                      |
| Indication of statistical uncertainty of findings                                                                                                                                                                                                                            |                   |                      |
| <b>Reporting of Discussion</b>                                                                                                                                                                                                                                               |                   |                      |
| Quantitative assessment of bias (eg, publication bias)                                                                                                                                                                                                                       |                   |                      |
| Justification for exclusion (eg, exclusion of non-English-language citations)                                                                                                                                                                                                |                   |                      |
| Assessment of quality of included studies                                                                                                                                                                                                                                    |                   |                      |
| <b>Reporting of Conclusions</b>                                                                                                                                                                                                                                              |                   |                      |
| Consideration of alternative explanations for observed results                                                                                                                                                                                                               |                   |                      |
| Generalization of the conclusions (ie, appropriate for the data presented and within the domain of the literature review)                                                                                                                                                    |                   |                      |
| Guidelines for future research                                                                                                                                                                                                                                               |                   |                      |
| Disclosure of funding source                                                                                                                                                                                                                                                 |                   |                      |

Once you have completed this checklist, please save a copy and upload it as part of your submission. DO NOT include this checklist as part of the main manuscript document. It must be uploaded as a separate file.

# BMJ Open

## PROGNOSTIC FACTORS FOR STREPTOCOCCAL TOXIC SHOCK SYNDROME: SYSTEMATIC REVIEW AND META-ANALYSIS

|                                 |                                                                                                                                                                                                                                                                                                                                                                                                                                                                                                                                                                                                                                                                                                                                                                                        |
|---------------------------------|----------------------------------------------------------------------------------------------------------------------------------------------------------------------------------------------------------------------------------------------------------------------------------------------------------------------------------------------------------------------------------------------------------------------------------------------------------------------------------------------------------------------------------------------------------------------------------------------------------------------------------------------------------------------------------------------------------------------------------------------------------------------------------------|
| Journal:                        | <i>BMJ Open</i>                                                                                                                                                                                                                                                                                                                                                                                                                                                                                                                                                                                                                                                                                                                                                                        |
| Manuscript ID                   | bmjopen-2022-063023.R2                                                                                                                                                                                                                                                                                                                                                                                                                                                                                                                                                                                                                                                                                                                                                                 |
| Article Type:                   | Original research                                                                                                                                                                                                                                                                                                                                                                                                                                                                                                                                                                                                                                                                                                                                                                      |
| Date Submitted by the Author:   | 29-Sep-2022                                                                                                                                                                                                                                                                                                                                                                                                                                                                                                                                                                                                                                                                                                                                                                            |
| Complete List of Authors:       | Bartoszko, Jessica; McMaster University, Department of Health Research Methods, Evidence and Impact<br>Elias, Zeyad; University of Toronto, Department of Medicine<br>Rudziak, Paulina; Western University, Department of Biology<br>Lo, Carson KL; McMaster University, Department of Medicine<br>Thabane, Lehana; McMaster University, Department of Health Research Methods, Evidence and Impact; McMaster University, Departments of Anesthesia and Pediatrics<br>Mertz, Dominik; McMaster University, Department of Health Research Methods, Evidence and Impact; McMaster University, Department of Medicine<br>Loeb, Mark; McMaster University, Department of Health Research Methods, Evidence and Impact; McMaster University, Department of Pathology and Molecular Medicine |
| <b>Primary Subject Heading</b>: | Infectious diseases                                                                                                                                                                                                                                                                                                                                                                                                                                                                                                                                                                                                                                                                                                                                                                    |
| Secondary Subject Heading:      | Evidence based practice                                                                                                                                                                                                                                                                                                                                                                                                                                                                                                                                                                                                                                                                                                                                                                |
| Keywords:                       | Epidemiology < INFECTIOUS DISEASES, EPIDEMIOLOGY, BACTERIOLOGY, GENERAL MEDICINE (see Internal Medicine)                                                                                                                                                                                                                                                                                                                                                                                                                                                                                                                                                                                                                                                                               |
|                                 |                                                                                                                                                                                                                                                                                                                                                                                                                                                                                                                                                                                                                                                                                                                                                                                        |

SCHOLARONE™  
Manuscripts



I, the Submitting Author has the right to grant and does grant on behalf of all authors of the Work (as defined in the below author licence), an exclusive licence and/or a non-exclusive licence for contributions from authors who are: i) UK Crown employees; ii) where BMJ has agreed a CC-BY licence shall apply, and/or iii) in accordance with the terms applicable for US Federal Government officers or employees acting as part of their official duties; on a worldwide, perpetual, irrevocable, royalty-free basis to BMJ Publishing Group Ltd ("BMJ") its licensees and where the relevant Journal is co-owned by BMJ to the co-owners of the Journal, to publish the Work in this journal and any other BMJ products and to exploit all rights, as set out in our [licence](#).

The Submitting Author accepts and understands that any supply made under these terms is made by BMJ to the Submitting Author unless you are acting as an employee on behalf of your employer or a postgraduate student of an affiliated institution which is paying any applicable article publishing charge ("APC") for Open Access articles. Where the Submitting Author wishes to make the Work available on an Open Access basis (and intends to pay the relevant APC), the terms of reuse of such Open Access shall be governed by a Creative Commons licence – details of these licences and which [Creative Commons](#) licence will apply to this Work are set out in our licence referred to above.

Other than as permitted in any relevant BMJ Author's Self Archiving Policies, I confirm this Work has not been accepted for publication elsewhere, is not being considered for publication elsewhere and does not duplicate material already published. I confirm all authors consent to publication of this Work and authorise the granting of this licence.

1  
2  
3 **PROGNOSTIC FACTORS FOR STREPTOCOCCAL TOXIC SHOCK SYNDROME:**  
4 **SYSTEMATIC REVIEW AND META-ANALYSIS**  
5  
6  
7

8 Jessica J Bartoszko HBSc<sup>1</sup>, Zeyad Elias BSc<sup>2</sup>, Paulina Rudziak BSc(c)<sup>3</sup>, Carson KL Lo MD<sup>4</sup>,  
9 Lehana Thabane PhD<sup>1,5,6</sup>, Dominik Mertz MD<sup>1,4,7,8</sup>, Mark Loeb MD<sup>1,7,8</sup>  
10  
11

12  
13 <sup>1</sup> Department of Health Research Methods, Evidence and Impact, McMaster University,  
14 Hamilton, Ontario, Canada  
15

16 <sup>2</sup> Department of Medicine, University of Toronto, Toronto, Ontario, Canada  
17

18 <sup>3</sup> Department of Biology, Western University, London, Ontario, Canada  
19

20 <sup>4</sup> Division of Infectious Diseases, Department of Medicine, McMaster University, Hamilton,  
21 Ontario, Canada  
22

23 <sup>5</sup> Departments of Anesthesia and Pediatrics, McMaster University, Hamilton, Ontario, Canada  
24

25 <sup>6</sup> Biostatistics Unit, St. Joseph's Healthcare Hamilton, Hamilton, Ontario, Canada  
26

27 <sup>7</sup> Institute for Infectious Disease Research, McMaster University, Hamilton, Ontario, Canada  
28

29 <sup>8</sup> Department of Pathology and Molecular Medicine, McMaster University, Hamilton, Ontario,  
30 Canada  
31

32  
33  
34 Corresponding author:  
35

36 Dr. Mark Loeb, [loebm@mcmaster.ca](mailto:loebm@mcmaster.ca), McMaster University, Hamilton, Canada, L8S 4L8  
37  
38

39 Key words: streptococcal toxic shock syndrome (STSS); systematic review; meta-analysis  
40  
41

42  
43 Word count: 4320  
44  
45  
46  
47  
48  
49  
50  
51  
52  
53  
54  
55  
56  
57  
58  
59  
60

## ABSTRACT

**Objectives:** To quantify the prognostic effects of demographic and modifiable factors in streptococcal toxic shock syndrome (STSS).

**Design:** Systematic review and meta-analysis.

**Data sources:** MEDLINE, EMBASE and CINAHL from inception to 19 September 2022, along with citations of included studies.

**Eligibility criteria:** Pairs of reviewers independently screened potentially eligible studies of patients with GAS-induced STSS that quantified the association between at least one prognostic factor and outcome of interest.

**Data extraction and synthesis:** We performed random-effects meta-analysis after duplicate data extraction and risk of bias assessments. We rated the certainty of evidence using the GRADE approach.

**Results:** One randomized trial and 40 observational studies were eligible (n=1,918 patients). We found a statistically significant association between clindamycin treatment and mortality (n=144; odds ratio [OR] 0.14, 95% CI 0.06 to 0.37), but the certainty of evidence was low. Within clindamycin-treated STSS patients, we found a statistically significant association between intravenous immunoglobulin (IVIG) treatment and mortality (n=188; OR 0.34, 95% CI 0.15 to 0.75), but the certainty of evidence was also low. The odds of mortality may increase in patients  $\geq 65$  years when compared to patients 18-64 years (n=396; OR 2.37, 95% CI 1.47 to 3.84), but the certainty of evidence was low. We are uncertain whether non-steroidal anti-inflammatory drugs (NSAIDs) increased the odds of mortality (n=50; OR 4.14, 95% CI 1.13 to 15.14; very low certainty). Results failed to show a significant association between any other prognostic factor and outcome combination (very low to low certainty evidence) and no studies quantified the association between a prognostic factor and morbidity post-infection in STSS survivors.

**Conclusions:** Treatment with clindamycin and within clindamycin-treated patients, IVIG, was each significantly associated with mortality, but the certainty of evidence was low. Future research should focus on morbidity post-infection in STSS survivors.

## STRENGTHS AND LIMITATIONS OF THIS STUDY

- Strengths of this review include its systematic and explicit search of the literature, capture of a wide breadth of patient-important outcomes within and outside of critical care and the use of meta-analysis to increase statistical power in studying relationships between prognostic factors and outcomes in STSS patients.
- These strengths directly address limitations of an existing narrative synthesis of STSS prognosis restricted to the critical care setting.
- In the absence of large cohort studies and randomized trials, conclusions for STSS prognosis in this review are limited by very low to low certainty evidence.
- A limitation of the evidence is the lack of long-term outcome data reported, including morbidity post-infection in STSS survivors.

## Introduction

Streptococcal toxic shock syndrome (STSS) is an acute and severe life-threatening complication of predominantly invasive Group A *Streptococcus* (GAS) infections. STSS is relatively uncommon, but is fatal [1]. Using US data from 2000 to 2004, the Center for Diseases Control and Prevention estimated an annual incidence rate of 0.2 cases per 100,000 people and a fatality rate of 36% [2]. STSS has important consequences for morbidity as well, in which patients may require radical surgical debridement, and patients with organ failure may have permanent respiratory and renal insufficiency [1].

Although extensive multidisciplinary clinical management efforts by intensivists, infectious disease specialists, and surgeons have curbed STSS all-cause mortality [1], data on the natural history of long-term sequelae in surviving patients, such as renal, respiratory and neuropsychiatric complications, are sparse [1-4]. Published studies of prognostic and treatment factors for STSS have consistently focused on associations with all-cause mortality [5-14], with few reporting on outcomes capturing the morbidity post-infection in STSS survivors [7, 12]. Furthermore, a thorough and systematic review to corroborate this evidence is lacking. A narrative review of STSS was limited by the lack of a systematic or explicit search of the literature, it included studies that were only narratively synthesized, and the focus was limited to studies within a critical care setting [1].

Understanding prognosis of STSS is important for patients, clinicians, and healthcare decision makers. We conducted a systematic review to summarize the prognostic and treatment factors, and outcomes of STSS. We aimed to capture a wide breadth of patient-important outcomes with follow up that included both short- and long-term outcomes within and outside of critical care.

## Materials and methods

We registered a protocol for the present systematic review and meta-analysis with PROSPERO (CRD42020166961) [15, 16]. We report this systematic review and meta-analysis following the guidelines of the Preferred Reporting Items for Systematic Reviews and Meta-Analyses (PRISMA) and Meta-analyses of Observational Studies in Epidemiology (MOOSE) checklists [17, 18]. Decisions regarding criteria for study inclusion, search methods for identification of



1  
2  
3 studies, data collection, risk of bias, evaluation of the certainty of evidence and analysis were  
4 established a priori.  
5  
6  
7

### 8 **Search strategy and selection criteria**

9

10 We searched MEDLINE (OVID interface, Epub Ahead of Print, In-Process & Other Non-  
11 Indexed Citations, 1946 to 19 September 2022), EMBASE (OVID interface, 1974 to 19  
12 September 2022) and the Cumulative Index to Nursing And Allied Health Literature (CINAHL)  
13 from inception to 19 September 2022, with no restrictions on publication date. We applied search  
14 filters for randomized controlled trials and non-randomized studies (cohort, case-control and case  
15 series with at least 2 STSS patients) [19, 20], and tailored search strategies to each database. We  
16 restricted included studies to the English language to facilitate screening of full-texts [21, 22]  
17 and searched citations of included studies to minimize the risk of failing to include relevant  
18 studies.  
19  
20  
21  
22  
23  
24  
25  
26

27 We included studies of randomized and non-randomized designs that reported the association of  
28 at least one prognostic factor of interest on at least one outcome of interest, and compared GAS-  
29 induced STSS patients with the prognostic factor of interest (i.e. exposed) to GAS-induced STSS  
30 patients without the prognostic factor of interest (i.e. unexposed). Studies of patients with  
31 microbiologically confirmed STSS, probable cases of STSS and patients with clinical evidence  
32 of STSS as defined by study authors and generally consistent with the below criteria were  
33 eligible [3, 23]. Clinical evidence of STSS included hypotension and at least two of the  
34 following: renal impairment, coagulopathy, liver function abnormality, acute respiratory distress  
35 syndrome, generalized erythematous macular rash (with desquamation), soft-tissue necrosis  
36 (including necrotizing fasciitis, myositis or gangrene), or meningitis. Probable cases of STSS  
37 were defined as meeting clinical evidence with GAS isolated from a non-sterile site (e.g. throat,  
38 sputum, superficial skin lesion) or antigen detected. Confirmed cases of STSS were defined as  
39 meeting clinical evidence with GAS isolated from a sterile site (e.g. blood, cerebrospinal fluid,  
40 deep tissue specimen taken during surgery) [3, 23]. Demographic, comorbidity, infection,  
41 modifiable and process variables were prognostic factors of interest. Informed by clinical  
42 expertise in the review team, we selected outcomes based on importance to patients. Further, we  
43 aimed to capture the long-term sequelae in patients surviving STSS [1, 2, 4]. We chose the  
44  
45  
46  
47  
48  
49  
50  
51  
52  
53  
54  
55  
56  
57  
58  
59  
60

1  
2  
3 following outcomes of interest: (time to) mortality, hospital length-of-stay, pediatric (P)  
4 intensive care unit (ICU) admission, (P)ICU length-of-stay, mechanical ventilation, duration of  
5 mechanical ventilation, (time to) clinical cure/improvement or resolution of shock, change in  
6 Sequential Organ Failure Assessment (SOFA) score from baseline, functional status (e.g.  
7 physical component summary (PCS) score on the 36-item short form health survey (SF-36)) and  
8 health related quality of life (HRQoL). We also extracted on cost outcomes, which are relevant  
9 to hospital and patient payees.  
10  
11  
12  
13  
14  
15  
16

17 We excluded case reports and conference abstracts, and studies in which the population was less  
18 than 80% GAS-induced STSS cases (i.e. toxic shock syndrome of bacterial aetiologies other than  
19 GAS made up more than 20% of the study population). Because prognostic evidence in STSS  
20 patients is scarce [1, 2, 4], we did not apply any restrictions based on analytical method (e.g.  
21 conducting an adjusted, multivariable analysis) or sample size.  
22  
23  
24  
25  
26

27 Using a systematic review software, Rayyan [24], following training and calibration exercises,  
28 pairs of reviewers independently screened all titles and abstracts, followed by full-texts of  
29 records that were identified as potentially eligible. When necessary, consensus was reached  
30 through discussion between the review pair, and arbitration by a senior co-investigator in the  
31 absence of consensus.  
32  
33  
34  
35  
36  
37

### 38 **Data analysis**

39 For each eligible study, pairs of reviewers extracted data independently using a standardized,  
40 pilot tested data extraction form. Reviewers collected information on study characteristics (study  
41 design as defined by study authors, sample size, country), patient characteristics (age, sex),  
42 disease characteristics (confirmed vs probable STSS, presence of necrotizing fasciitis),  
43 prognostic factors and outcomes of interest (means or medians and measures of variability for  
44 continuous outcomes and the proportion of participants who experienced an event for  
45 dichotomous outcomes). If multiple time points were reported for outcomes of interest, we  
46 extracted all time points. To minimize risk of confounding associated with prognostic effect  
47 estimates on dichotomous outcomes in non-randomized studies, we preferentially extracted  
48 adjusted odds ratios (ORs) and corresponding 95% confidence intervals (CI) over proportions  
49  
50  
51  
52  
53  
54  
55  
56  
57  
58  
59  
60

1  
2  
3 when both were reported. We used the proportions to calculate crude ORs when no adjusted ORs  
4 were provided. Reviewers resolved discrepancies by discussion and, when necessary, with  
5 adjudication by a senior co-investigator.  
6  
7

8  
9  
10 Following training and calibration exercises, reviewers, independently and in duplicate, used the  
11 Quality in Prognosis Studies (QUIPS) tool to rate each prognostic factor and outcome  
12 combination at low, moderate or high risk of bias. Based on prespecified sets of questions, we  
13 assessed risk of bias across the following domains: participation, attrition, prognostic factor  
14 measurement, outcome measurement, confounding, and statistical analysis and reporting [25].  
15 For studies addressing more than one prognostic factor and outcome combination, we reported  
16 the highest risk of bias rating among the prognostic factor and outcome combinations within a  
17 study for each domain. In addition to assessing risk of bias at the domain-level as outlined in the  
18 QUIPS tool, we applied the following rules to assess risk of bias overall at the study-level. We  
19 rated overall study risk of bias as low if the study was prospective and five or more domains  
20 were assessed as low risk of bias, and high if two or more domains were assessed as high risk of  
21 bias. All other studies were rated as moderate risk of bias overall. Due to high risk of selection  
22 bias and residual confounding, we rated all case series as high risk of bias overall. Reviewer  
23 pairs resolved discrepancies by discussion and, when needed, with adjudication by a senior co-  
24 investigator.  
25  
26  
27  
28  
29  
30  
31  
32  
33  
34  
35  
36  
37

38 Pairs of reviewers used the grading of recommendations, assessment, development, and  
39 evaluation (GRADE) approach to independently assess the certainty of prognostic evidence for  
40 each meta-analysed outcome. Criteria for rating the certainty for each prognostic factor and  
41 outcome as high, moderate, low, or very low, included considerations of risk of bias,  
42 inconsistency, indirectness, size and precision of the association and publication bias [26, 27].  
43 Judgments of imprecision for this systematic review were made using a minimally contextualised  
44 approach. This approach considers whether confidence intervals include the null effect. Further,  
45 the terminology used to report GRADE ratings (e.g. low certainty evidence) is based on  
46 published GRADE guidance [28, 29]. The supplementary file presents the detailed guidance we  
47 developed to facilitate the certainty of the evidence assessment in this review. To facilitate  
48 interpretation of the results in which the summary measure was an OR, we used the median  
49  
50  
51  
52  
53  
54  
55  
56  
57  
58  
59  
60

1  
2  
3 event rate in the reference group of studies reporting proportions to calculate baseline risks and  
4 subsequently calculated absolute effects. GRADE evidence summaries (Summary of Findings  
5 tables) were generated in the MAGIC Authoring and Publication Platform ([www.magicapp.org](http://www.magicapp.org)).  
6  
7  
8

9  
10 When at least two included studies reported on the same prognostic factor and outcome in  
11 patients with GAS-induced STSS, we conducted DerSimonian and Laird random-effects meta-  
12 analyses using the *metafor* package in R version 4.0.4 (R Studio, Boston, MA, USA) [30]. We  
13 summarised the effects of prognostic factors on dichotomous outcomes using ORs and  
14 corresponding 95% CI, and on continuous outcomes using mean differences and corresponding  
15 95% CI. For prognostic factor and dichotomous outcome combinations in which every patient in  
16 the reference arm experienced the outcome, we summarised the effects by directly calculating  
17 risk differences and corresponding 95% CI. We set the criterion for statistical significance at  
18  $\alpha = 0.05$ . Visual inspection of forest plots and the chi-square test were performed to evaluate  
19 heterogeneity. We interpreted an  $I^2$  statistic value of 0%-40%, 30%-60%, 50%-90%, or 75%-  
20 100% as not likely important, moderate, substantial, or considerable heterogeneity, respectively  
21 [31]. If an  $I^2$  statistic value was within a range of overlapping values (e.g. 80%), we would  
22 interpret heterogeneity as more important (e.g. considerable instead of substantial) if the meta-  
23 analysis contained few studies, we observed inconsistent magnitudes and directions of summary  
24 estimates upon visual inspection of the forest plots, or the chi-square test was significant [31].  
25 For meta-analyses of continuous outcomes, we imputed means and standard deviations for  
26 studies reporting medians and (interquartile) ranges, respectively [32, 33].  
27  
28  
29  
30  
31  
32  
33  
34  
35  
36  
37  
38  
39  
40

41 Patient-level data from case-series were aggregated when possible to enable comparative  
42 analysis via meta-analysis. We planned to perform a regression analysis for each study for which  
43 age was reported at the patient level to generate a study and age category (0 to 17 years old vs 18  
44 to 64 years old vs 65 years old or older) specific OR that could be used in meta-analysis when a  
45 study had at least 10 observations for continuous outcomes and 10 events for dichotomous  
46 outcomes; however, no study met the sample size or event number requirements. Further,  
47 scarcity and variability of data precluded our plan to narratively synthesize the evidence from  
48 included studies for which meta-analysis of a prognostic factor and outcome combination was  
49 not possible.  
50  
51  
52  
53  
54  
55  
56  
57  
58  
59  
60

1  
2  
3  
4  
5 The analysis plan included performing subgroup analyses of STSS patients treated with  
6 clindamycin vs no clindamycin, STSS patients with necrotizing fasciitis vs without necrotizing  
7 fasciitis, age (0 to 17 years old vs 18 to 64 years old vs 65 years old or older), sex (male vs  
8 female) and risk of bias (high vs moderate vs low) when at least two studies were present for  
9 each subgroup. Because select meta-analyses were limited by small numbers of events, we  
10 performed a post-hoc sensitivity analysis using the Peto method for meta-analysis, which is  
11 recommended for meta-analysis of rare events [34], and compared the results to those from the  
12 DerSimonian and Laird method we applied in this review.  
13  
14  
15  
16  
17  
18  
19

### 20 **Patient and public involvement**

21 It was not appropriate or possible to involve patients or the public in the design, or conduct, or  
22 reporting, or dissemination plans of our research.  
23  
24  
25  
26

### 27 **Results**

28 After screening 27,321 titles and abstracts, and 305 full texts, 41 studies that reported on the  
29 association between at least one prognostic factor and outcome of interest in STSS patients  
30 proved eligible (Figure 1). All but one study (40/41, 98%) were non-randomized. Eligible studies  
31 were published between 1989 and 2021, ranged in sample size from 2 to 476, included 1,918  
32 STSS patients in total and were conducted in 22 different countries, most commonly in the  
33 United States (15/41, 37%).  
34  
35  
36  
37  
38  
39  
40

41 Table 1 describes the characteristics of included studies reporting on the association of at least  
42 one prognostic factor and outcome of interest. The supplementary data includes additional study  
43 characteristics for each study. Of the 41 included studies, 29 (71%) reported on demographic  
44 prognostic factors of interest, 5 (12%) medical history of being immunocompromised, 11 (27%)  
45 early disease characteristics, and 16 (39%) treatment. Of the dichotomous outcomes, mortality  
46 was most commonly reported (36/41, 88%), followed by (P)ICU admission (10/41, 24%),  
47 clinical cure or improvement (8/41, 20%) and need for mechanical ventilation (6/41, 15%). Few  
48 studies reported on hospital (3/41, 7%) and ICU length-of-stay (2/41, 5%). Two studies reported  
49 on time to mortality in days [7, 35]; however, only one reported sufficient data precluding meta-  
50  
51  
52  
53  
54  
55  
56  
57  
58  
59  
60

analysis [7]. One study each reported on cost [14], change in SOFA score [7], time to clinical improvement or resolution of shock [7] and duration of mechanical ventilation [10] precluding meta-analysis for these continuous outcomes. No studies quantified the association between a prognostic factor and functional status or health related quality of life outcomes. A multivariable analysis was conducted in two (5%) of the included studies [10, 11]. A total of 19 of the 41 studies were cohort studies (authors reported on at least one comparative analysis), 19 were case series (authors did not report a comparative analysis) and 2 were case-control studies. To meta-analyse the data, we aggregated the data from the individual patients the case series reported on. Further, we pooled the one randomized study [7] with non-randomized studies in meta-analyses and included patients receiving intravenous or intramuscular IVIG from one non-randomized study [36].

**Table 1. Study characteristics. Values are numbers (percentages) of studies unless stated otherwise.**

| <b>Characteristics</b>       | <b>(41 studies, 1918 patients)</b> |
|------------------------------|------------------------------------|
| Range of publication year    | 1989 to 2021                       |
| Median (IQR) No. of patients | 11 (5 to 29)                       |
| Geographical region:         |                                    |
| North America                | 19 (46)                            |
| Europe                       | 14 (34)                            |
| Central/South America        | 0 (0)                              |
| Asia                         | 4 (10)                             |
| Other                        | 4 (10)                             |
| Study design:                |                                    |
| Randomized trial             | 1 (2)                              |
| Cohort                       | 19 (46)                            |
| Case-control                 | 2 (5)                              |
| Case-series                  | 19 (46)                            |
| Case definition:             |                                    |
| Probable STSS patients       | 115 (6)                            |
| Confirmed STSS patients      | 227 (12)                           |
| Prognostic factor type:      |                                    |
| Demographic                  | 29 (71)                            |
| Medical history              | 5 (12)                             |
| Early disease                | 11 (27)                            |
| Treatment                    | 16 (39)                            |

1  
2  
3 IQR=interquartile range

4 STSS=streptococcal toxic shock syndrome

5 Medical history included prognostic variable: immunocompromised

6 Early disease included prognostic variables: necrotizing fasciitis, acute renal failure

7  
8  
9  
10 The supplementary material includes the forest plots depicting the studies included in the meta-  
11 analysis of each prognostic factor-outcome combination. It also includes the list of studies  
12 reporting on prognostic factor-outcome combinations of interest that were not eligible for any  
13 meta-analysis, along with the reasons for exclusion from meta-analysis.  
14  
15

### 16 17 18 **Risk of bias in included studies**

19  
20 The supplementary file presents the risk of bias assessment of the 41 included studies. The  
21 majority of studies were rated as high risk of bias overall owing to residual confounding and lack  
22 of adjustment for confounding in statistical analyses (37/41, 90%) [2, 5, 6, 10, 35-67]. Three  
23 studies were rated at moderate risk of bias overall [7, 14, 68] and one at low risk of bias overall  
24 [11].  
25  
26  
27  
28  
29

### 30 31 **Prognostic factors for mortality**

32 Eleven prognostic factors from 32 studies including 1343 patients were eligible for analysis  
33 (table 2, supplementary data). We found a statistically significant association between  
34 clindamycin treatment and mortality (figure 2A; n=144; odds ratio [OR] 0.14, 95% CI 0.06 to  
35 0.37), but the certainty of evidence was low. Within clindamycin-treated STSS patients, we  
36 found a statistically significant association between intravenous immunoglobulin (IVIG)  
37 treatment and mortality (figure 2B; n=188; OR 0.34, 95% CI 0.15 to 0.75), but the certainty of  
38 evidence was also low. We are uncertain whether IVIG treatment reduces the odds of mortality  
39 in all STSS patients regardless of concurrent clindamycin treatment (n=365, OR 0.37, 95% CI  
40 0.17 to 0.80; very low certainty of evidence). The odds of mortality may increase in patients  $\geq 65$   
41 years when compared to patients 18-64 years (n=396; OR 2.37, 95% CI 1.47 to 3.84), but the  
42 certainty of evidence was low. We are less certain whether the same is true for patients  $\geq 65$  years  
43 compared to patients  $< 18$  years (n=136, OR 10.66, 95% CI 1.28 to 88.57; very low certainty of  
44 evidence). We are also uncertain whether NSAIDs increase the odds of mortality (n=50, OR  
45 4.14, 95% CI 1.13 to 15.14; very low certainty of evidence). Very low certainty evidence failed  
46  
47  
48  
49  
50  
51  
52  
53  
54  
55  
56  
57  
58  
59  
60

to show a significant association with any other prognostic factor and mortality in STSS patients: male vs female (n=80, OR 0.95, 95% CI 0.36 to 2.52), patients <18 years vs patients 18 to 64 years (n=694, OR 0.54, 95% CI 0.15 to 1.94), immunocompromised vs not immunocompromised (n=33, OR 1.65, 95% CI 0.33 to 8.26), necrotizing fasciitis vs no necrotizing fasciitis (n=840, OR 0.81, 95% CI 0.51 to 1.29), acute renal failure vs no acute renal failure (n=91, OR 2.50, 95% CI 0.97 to 6.42), hemodialysis vs no hemodialysis (n=42, OR 1.94, 95% CI 0.22 to 16.99) and any antibiotic vs no antibiotic (n=19, OR 0.48, 95% CI 0.05 to 4.76).

**Table 2. Summary of findings for prognostic factor – outcome meta-analyses.**

| Prognostic factor                                                  | Number of patients (studies) | Odds ratio (95% confidence interval) | Absolute effect estimates           |                             | GRADE: Certainty of the Evidence                                                               |
|--------------------------------------------------------------------|------------------------------|--------------------------------------|-------------------------------------|-----------------------------|------------------------------------------------------------------------------------------------|
|                                                                    |                              |                                      | Risk without prognostic factor      | Risk with prognostic factor |                                                                                                |
| <b>MORTALITY</b>                                                   |                              |                                      |                                     |                             |                                                                                                |
| Demographic                                                        |                              |                                      |                                     |                             |                                                                                                |
| Male vs Female                                                     | 80 (13)                      | 0.95 (0.36 to 2.52)                  | 250 per 1000<br>-9 (-143 to 207)    | 241 per 1000                | <b>Very low</b><br>Due to very serious risk of bias and imprecision                            |
| <18 vs 18-64 years                                                 | 694 (5)                      | 0.54 (0.15 to 1.94)                  | 234 per 1000<br>-92 (-190 to 138)   | 142 per 1000                | <b>Very low</b><br>Due to very serious risk of bias and imprecision, and serious inconsistency |
| ≥65 vs <18 years                                                   | 136 (2)                      | 10.66 (1.28 to 88.57)*               | 50 per 1000<br>309 (13 to 773)      | 359 per 1000                | <b>Very low</b><br>Due to very serious risk of bias and serious imprecision                    |
| ≥65 vs 18-64 years                                                 | 396 (2)                      | 2.37 (1.47 to 3.84)*                 | 193 per 1000<br>169 (67 to 286)     | 362 per 1000                | <b>Low</b><br>Due to very serious risk of bias                                                 |
| Medical history                                                    |                              |                                      |                                     |                             |                                                                                                |
| Immunocompromised vs Not Immunocompromised                         | 33 (4)                       | 1.65 (0.33 to 8.26)                  | 438 per 1000<br>125 (-233 to 428)   | 563 per 1000                | <b>Very low</b><br>Due to very serious risk of bias and imprecision                            |
| Early disease                                                      |                              |                                      |                                     |                             |                                                                                                |
| Acute Renal Failure vs No Acute Renal Failure                      | 91 (4)                       | 2.50 (0.97 to 6.42)                  | NA per 1000<br>140 (-60 to 330)     | NA per 1000                 | <b>Very low</b><br>Due to very serious risk of bias and imprecision                            |
| Necrotizing Fasciitis vs No Necrotizing Fasciitis                  | 840 (10)                     | 0.81 (0.51 to 1.29)                  | 347 per 1000<br>-46 (-134 to 60)    | 301 per 1000                | <b>Very low</b><br>Due to very serious risk of bias and imprecision                            |
| Treatment                                                          |                              |                                      |                                     |                             |                                                                                                |
| IVIG vs No IVIG (all STSS patients)                                | 365 (9)                      | 0.37 (0.17 to 0.80)*                 | 231 per 1000<br>-131 (-182 to -37)  | 100 per 1000                | <b>Very low</b><br>Due to very serious risk of bias and serious imprecision                    |
| IVIG vs No IVIG (subset of STSS patients treated with clindamycin) | 188 (6)                      | 0.34 (0.15 to 0.75)*                 | 300 per 1000<br>-173 (-240 to -57)  | 127 per 1000                | <b>Low</b><br>Due to serious risk of bias and imprecision                                      |
| Any Antibiotic vs No Antibiotic                                    | 19 (3)                       | 0.48 (0.05 to 4.76)                  | NA per 1000<br>-120 (-490 to 260)   | NA per 1000                 | <b>Very low</b><br>Due to very serious risk of bias and imprecision                            |
| Clindamycin vs No Clindamycin Antibiotic                           | 144 (4)                      | 0.14 (0.06 to 0.37)*                 | 800 per 1000<br>-441 (-606 to -203) | 359 per 1000                | <b>Low</b><br>Due to serious risk of bias and imprecision                                      |
| Hemodialysis vs No Hemodialysis                                    | 42 (4)                       | 1.94 (0.22 to 16.99)                 | 107 per 1000                        | 189 per 1000                | <b>Very low</b>                                                                                |



|                                                          |         |                       |                    |                                                  |
|----------------------------------------------------------|---------|-----------------------|--------------------|--------------------------------------------------|
|                                                          |         |                       | 82 (-81 to 564)    | Due to very serious risk of bias and imprecision |
| NSAIDs vs No NSAIDs                                      | 50 (4)  | 4.14 (1.13 to 15.14)* | 100 per 1000       | 315 per 1000                                     |
|                                                          |         |                       | 215 (12 to 527)    |                                                  |
| Due to very serious risk of bias and serious imprecision |         |                       |                    |                                                  |
| <b>ICU ADMISSION</b>                                     |         |                       |                    |                                                  |
| Demographic                                              |         |                       |                    |                                                  |
| Male vs Female                                           | 19 (3)  | 2.87 (0.29 to 28.27)  | NA per 1000        | NA per 1000                                      |
|                                                          |         |                       | 150 (-160 to 450)  |                                                  |
| Due to very serious risk of bias and imprecision         |         |                       |                    |                                                  |
| Early disease                                            |         |                       |                    |                                                  |
| Necrotizing Fasciitis vs No Necrotizing Fasciitis        | 28 (3)  | 0.74 (0.12 to 4.48)   | 900 per 1000       | 869 per 1000                                     |
|                                                          |         |                       | -31 (-381 to 76)   |                                                  |
| Due to very serious risk of bias and imprecision         |         |                       |                    |                                                  |
| Treatment                                                |         |                       |                    |                                                  |
| IVIG vs No IVIG (all STSS patients)                      | 156 (3) | 1.09 (0.43 to 2.77)   | 833 per 1000       | 845 per 1000                                     |
|                                                          |         |                       | 12 (-151 to 100)   |                                                  |
| Due to very serious risk of bias and imprecision         |         |                       |                    |                                                  |
| Any Antibiotic vs No Antibiotic                          | 14 (2)  | 4.60 (0.29 to 72.89)  | 500 per 1000       | 821 per 1000                                     |
|                                                          |         |                       | 321 (-275 to 486)  |                                                  |
| Due to very serious risk of bias and imprecision         |         |                       |                    |                                                  |
| Hemodialysis vs No Hemodialysis                          | 13 (2)  | 3.25 (0.21 to 50.35)  | 875 per 1000       | 958 per 1000                                     |
|                                                          |         |                       | 83 (-280 to 122)   |                                                  |
| Due to very serious risk of bias and imprecision         |         |                       |                    |                                                  |
| NSAIDs vs No NSAIDs                                      | 15 (2)  | 0.86 (0.06 to 12.48)  | NA per 1000        | NA per 1000                                      |
|                                                          |         |                       | -10 (-430 to 400)  |                                                  |
| Due to very serious risk of bias and imprecision         |         |                       |                    |                                                  |
| <b>CLINICAL CURE OR IMPROVEMENT</b>                      |         |                       |                    |                                                  |
| Demographic                                              |         |                       |                    |                                                  |
| Male vs Female                                           | 23 (4)  | 3.33 (0.47 to 23.59)  | 875 per 1000       | 959 per 1000                                     |
|                                                          |         |                       | 84 (-108 to 119)   |                                                  |
| Due to very serious risk of bias and imprecision         |         |                       |                    |                                                  |
| Early disease                                            |         |                       |                    |                                                  |
| Necrotizing Fasciitis vs No Necrotizing Fasciitis        | 24 (2)  | 0.34 (0.02 to 5.20)   | 950 per 1000       | 866 per 1000                                     |
|                                                          |         |                       | -84 (-675 to 40)   |                                                  |
| Due to very serious risk of bias and serious imprecision |         |                       |                    |                                                  |
| Treatment                                                |         |                       |                    |                                                  |
| IVIG vs No IVIG (in all STSS patients)                   | 23 (2)  | 0.27 (0.02 to 3.76)   | NA per 1000        | NA per 1000                                      |
|                                                          |         |                       | -100 (-350 to 140) |                                                  |
| Due to very serious risk of bias and imprecision         |         |                       |                    |                                                  |
| Hemodialysis vs No Hemodialysis                          | 26 (3)  | 1.43 (0.15 to 14.08)  | NA per 1000        | NA per 1000                                      |
|                                                          |         |                       | 50 (-240 to 340)   |                                                  |
| Due to very serious risk of bias and imprecision         |         |                       |                    |                                                  |
| <b>NEED FOR MECHANICAL VENTILATION</b>                   |         |                       |                    |                                                  |
| Demographic                                              |         |                       |                    |                                                  |
| Male vs Female                                           | 21 (3)  | 2.09 (0.32 to 13.74)  | NA per 1000        | NA per 1000                                      |
|                                                          |         |                       | 120 (-200 to 440)  |                                                  |
| Due to very serious risk of bias and imprecision         |         |                       |                    |                                                  |
| Early disease                                            |         |                       |                    |                                                  |
| Acute Renal Failure vs No Acute Renal Failure            | 20 (2)  | 1.14 (0.17 to 7.82)   | 750 per 1000       | 774 per 1000                                     |
|                                                          |         |                       | 24 (-412 to 209)   |                                                  |
| Due to very serious risk of bias and imprecision         |         |                       |                    |                                                  |
| Necrotizing Fasciitis vs No Necrotizing Fasciitis        | 31 (3)  | 3.75 (0.47 to 29.81)  | 700 per 1000       | 897 per 1000                                     |
|                                                          |         |                       | 197 (-177 to 286)  |                                                  |
| Due to very serious risk of bias and imprecision         |         |                       |                    |                                                  |
| Treatment                                                |         |                       |                    |                                                  |
| IVIG vs No IVIG (in all STSS patients)                   | 157 (3) | 2.22 (0.78 to 6.32)   | 333 per 1000       | 526 per 1000                                     |
|                                                          |         |                       | 193 (-53 to 426)   |                                                  |
| Due to very serious risk of bias and imprecision         |         |                       |                    |                                                  |

|                                      |         |                      |                                                        |              |                                                                             |
|--------------------------------------|---------|----------------------|--------------------------------------------------------|--------------|-----------------------------------------------------------------------------|
| Hemodialysis vs No Hemodialysis      | 26 (3)  | 2.05 (0.39 to 10.70) | 500 per 1000                                           | 672 per 1000 | <b>Very low</b><br>Due to very serious risk of bias and imprecision         |
|                                      |         |                      | 172 (-219 to 415)                                      |              |                                                                             |
| DURATION OF HOSPITALIZATION          |         |                      |                                                        |              |                                                                             |
| Treatment                            |         |                      |                                                        |              |                                                                             |
| IVIG vs no IVIG (all STSS patients)  | 201 (3) | NA                   | NA per 1000                                            | NA per 1000  | <b>Low</b><br>Due to serious risk of bias and imprecision                   |
|                                      |         |                      | On average, 5.51 fewer days (17.64 fewer to 6.62 more) |              |                                                                             |
| DURATION OF INTENSIVE CARE UNIT STAY |         |                      |                                                        |              |                                                                             |
| Treatment                            |         |                      |                                                        |              |                                                                             |
| IVIG vs no IVIG (all STSS patients)  | 131 (2) | NA                   | NA per 1000                                            | NA per 1000  | <b>Very low</b><br>Due to very serious risk of bias and serious imprecision |
|                                      |         |                      | On average, 3.80 more days (3.62 fewer to 11.23 more)  |              |                                                                             |

\*statistical evidence of an association

### Prognostic factors for ICU admission

Six prognostic factors from eight studies including 174 patients were eligible for analysis (table 2, supplementary data). We found no statistical evidence of an association between any prognostic factor and ICU admission: male vs female sex (n=19, OR 2.87, 95% CI 0.29 to 28.27), necrotizing fasciitis vs no necrotizing fasciitis (n=28, OR 0.74, 95% CI 0.12 to 4.48), hemodialysis vs no hemodialysis (n=13, OR 3.25, 95% CI 0.21 to 50.35), NSAIDs vs no NSAIDs (n=15, OR 0.86, 95% CI 0.06 to 12.48), IVIG treatment vs no IVIG treatment (n=156, OR 1.09, 95% CI 0.43 to 2.77) and antibiotic treatment vs no antibiotic treatment (n=14, OR 4.60, 95% CI 0.29 to 72.98). The certainty of all ICU admission evidence was very low due to very serious risk of bias and imprecision.

### Prognostic factors for clinical cure or improvement

Four prognostic factors from six studies including 38 STSS patients were eligible for analysis (table 2, supplementary data). We found no statistical evidence of an association between any prognostic factor and clinical cure or improvement: male vs female sex (n=23, OR 3.33, 95% CI 0.47 to 23.59), necrotizing fasciitis vs no necrotizing fasciitis (n=24, OR 0.34, 95% CI 0.02 to 5.20), hemodialysis vs no hemodialysis (n=26, OR 1.43, 95% CI 0.15 to 14.08) and IVIG treatment vs no IVIG treatment (n=23, OR 0.27, 95% CI 0.02 to 3.76). The certainty of all clinical cure or improvement evidence was very low due to very serious risk of bias and serious or very serious imprecision.

### **Prognostic factors for mechanical ventilation**

Five prognostic factors from six studies including 170 STSS patients were eligible for analysis (table 2, supplementary data). We found no statistical evidence of an association between any prognostic factor and need for mechanical ventilation: male vs female sex (n=21, OR 2.09, 95% CI 0.32 to 13.74), necrotizing fasciitis vs no necrotizing fasciitis (n=31, OR 3.75, 95% CI 0.47 to 29.81), acute renal failure vs no acute renal failure (n=20, OR 1.14, 95% CI 0.17 to 7.82), hemodialysis vs no hemodialysis (n=26, OR 2.05, 95% CI 0.39 to 10.70) and IVIG treatment vs no IVIG treatment (n=157, OR 2.22, 95% CI 0.78 to 6.32). The certainty of all need for mechanical ventilation evidence was very low due to very serious risk of bias and imprecision.

### **Prognostic factors for hospital length-of-stay**

One prognostic factor from three studies including 201 STSS patients was eligible for analysis (table 2, supplementary data). Low certainty evidence – due to serious risk of bias and imprecision – provides no support for an association between IVIG treatment and hospital length-of-stay, when compared to no IVIG treatment (n=201, MD -5.51 days, 95% CI -17.64 to 6.62).

### **Prognostic factors for intensive care unit length-of-stay**

One prognostic factor from two studies including 131 STSS patients was eligible for analysis (table 2, supplementary data). We are uncertain if IVIG treatment compared to no IVIG treatment is associated with ICU length-of-stay (n=131, MD 3.80 days, 95% CI -3.62 to 11.23; very low certainty evidence due to very serious risk of bias and serious imprecision).

### **Subgroup and sensitivity analysis**

Sparsity of data precluded our planned subgroup analyses by clindamycin treatment, presence of necrotizing fasciitis and sex (i.e. each subgroup did not have at least two studies). We collapsed the low and moderate risk of bias categories to allow for subgroup analysis by risk of bias (low or moderate vs high). The prognostic factor-outcome combinations for which there was sufficient evidence for subgroup analysis by age or modified risk of bias level were IVIG-mortality and sex-mortality. We found no statistical evidence that the association between IVIG and mortality differed between low or moderate and high risk of bias studies in all STSS patients

1  
2  
3 (p=0.884) and clindamycin-treated STSS patients (p=0.867) or between studies with STSS  
4 patients <18 years and patients 18-64 years (p=0.328). We also found no statistical evidence that  
5 the association between sex and mortality differed between studies with patients <18 years and  
6 patients 18-64 years (p=0.666). Because results were consistent across Peto, and DerSimonian  
7 and Laird methods, our post-hoc sensitivity analysis applying the Peto method supported our  
8 main results.  
9  
10  
11  
12  
13  
14

## 15 **Discussion**

16 This systematic review and meta-analysis provides a comprehensive overview of the prognostic  
17 evidence for STSS. Prognostic factors for which there was a statistically significant association  
18 with mortality in STSS patients were age, clindamycin treatment, IVIG treatment and NSAIDs  
19 treatment. Patients  $\geq 65$  years compared to patients 18 to 64 years may have increased odds of  
20 mortality (low certainty of evidence); however we are uncertain if the same is true for patients  
21  $\geq 65$  years compared to patients <18 years (very low certainty of evidence). We are also uncertain  
22 whether NSAIDs increase the odds of mortality (very low certainty of evidence). Low certainty  
23 evidence suggests the odds of mortality may be reduced by treatment with clindamycin and  
24 within clindamycin-treated patients, IVIG. We are highly uncertain whether IVIG reduces  
25 mortality in all STSS patients, regardless of clindamycin treatment (very low certainty of  
26 evidence). Results failed to show a significant association between all other meta-analyzed  
27 prognostic factors and outcomes (table 2). The certainty of STSS prognostic evidence was low or  
28 very low due to serious or very serious risk of bias and imprecision concerns.  
29  
30  
31  
32  
33  
34  
35  
36  
37  
38  
39  
40

41 Strengths of this review include its systematic and explicit search of the literature, capture of a  
42 wide breadth of patient-important outcomes within and outside of critical care and the use of  
43 meta-analysis to increase statistical power in studying relationships between prognostic factors  
44 and outcomes in STSS patients. These strengths directly address limitations of a narrative  
45 synthesis of STSS prognosis restricted to the critical care setting [1].  
46  
47  
48  
49  
50

51 In the absence of large cohort studies and randomized trials, conclusions for STSS prognosis in  
52 this review are limited by very low to low certainty evidence. The majority of included studies  
53 were non-randomized (40/41, 98%) and small (median sample size was 11 patients), introducing  
54  
55  
56  
57  
58  
59  
60

1  
2  
3 bias from residual confounding and imprecision around pooled summary estimates. Small  
4 numbers of events further contributed to the imprecision around summary estimates and limited  
5 the interpretation of our findings. With few participants and events, minor changes in the data  
6 can cause major changes in the results. In such instances, results can be exaggerated by the  
7 presentation of relative effect estimates only. To minimize the risk of misinterpreting results  
8 from the inclusion of small studies in our meta-analyses, we calculated an absolute effect  
9 estimate for each relative effect estimate (table 2). Further, despite expecting small studies to be  
10 more heterogeneous than large studies, we did not find statistical evidence of heterogeneity in  
11 any of our 33 meta-analyses and in interpreting the  $I^2$  statistic value, we found not likely  
12 important heterogeneity in all but one meta-analysis [69]. Creation of an international registry of  
13 STSS patients may improve the credibility of prognostic evidence for STSS and facilitate the  
14 conduct of high-quality cohort studies. Although we meta-analyzed adjusted odds ratios from  
15 included studies when possible, almost all included studies reported crude data (39/41, 95%),  
16 precluding adjustment for important confounders. A limitation of the evidence is the lack of  
17 long-term outcome data reported. For example, no studies quantified associations between  
18 prognostic factors and functional status or health related quality of life outcomes post-infection  
19 in STSS survivors. Given the high morbidity associated with STSS [70], future research in STSS  
20 prognosis should quantify these patient-important outcomes, facilitating future meta-analyses  
21 and providing further insights into STSS prognosis.  
22  
23  
24  
25  
26  
27  
28  
29  
30  
31  
32  
33  
34  
35  
36

37  
38 Our finding that IVIG treatment may reduce the odds of mortality in STSS patients who receive  
39 clindamycin treatment is consistent with a systematic review and meta-analysis of IVIG  
40 treatment in clindamycin-treated STSS patients, which found statistical evidence of a decreased  
41 risk of mortality in IVIG- and clindamycin-treated STSS patients when compared to only  
42 clindamycin-treated STSS patients [70]. For this question relevant to clindamycin-treated STSS  
43 patients, our meta-analysis included one additional non-randomized study, whose small sample  
44 size and imprecision contributed to an overall point estimate of greater magnitude [35]. Our  
45 findings suggest that treatment regimens of IVIG in adjunct to clindamycin and clindamycin  
46 alone may significantly improve STSS prognosis. We found a significant association between a  
47 regimen of IVIG regardless of clindamycin treatment and mortality; however, due to very serious  
48 risk of bias and serious imprecision, and thus very low certainty evidence, we cannot rule out the  
49  
50  
51  
52  
53  
54  
55  
56  
57  
58  
59  
60

possibility that clindamycin treatment may be necessary for STSS patients to benefit from IVIG treatment. Further, only one study reported on IVIG treatment in STSS patients that were not also treated with clindamycin [36]; therefore, our planned subgroup analysis to test if the beneficial effect of IVIG is modified in the absence of clindamycin was precluded. Based on very low certainty evidence, our finding that NSAID treatment is significantly associated with mortality in STSS patients can be explained by clinical and basic science literature, which suggests nonselective NSAIDs mask early signs and symptoms of GAS infection, such as fever, subsequently delaying time to antibiotic treatment – a risk factor for severe sepsis and shock, and mortality [71, 72].

After analyzing 30 different prognostic factor and outcome combinations, we found that clindamycin treatment was significantly associated with an improved STSS prognosis. Further, we found that IVIG treatment may reduce the odds of mortality in STSS patients who receive clindamycin treatment, but we are uncertain if this is true for all STSS patients, regardless of clindamycin treatment. Although these findings support the use of IVIG as an adjunctive treatment in clindamycin-treated STSS patients, the certainty of evidence was low due to serious risk of bias and imprecision. Age equal to or older than 65 years and treatment with NSAIDs were significantly associated with a worse STSS prognosis. Results from very low to low certainty evidence failed to show a significant association between any other factors of interest and STSS prognosis.

### Contributors

All authors attest they meet the ICMJE criteria for authorship. All authors have made substantial contributions to the following: (1) the conception and design of the study (Jessica J Bartoszko, Lehana Thabane, Dominik Mertz, Mark Loeb), acquisition of data (Jessica J Bartoszko, Zeyad Elias, Paulina Rudziak, Carson KL Lo), analysis and interpretation of data (Jessica J Bartoszko, Zeyad Elias, Paulina Rudziak, Carson KL Lo, Mark Loeb); (2) drafting the article and revising it critically for important intellectual content (Jessica J Bartoszko, Lehana Thabane, Dominik Mertz, Mark Loeb), (3) final approval of the version to be submitted (Jessica J Bartoszko, Zeyad Elias, Paulina Rudziak, Carson KL Lo, Lehana Thabane, Dominik Mertz, Mark Loeb).

### **Declaration of interests**

Mark Loeb declares grants or contracts from the World Health Organization, consulting fees from AVIR Pharma, and participating on data safety monitoring or advisory boards for Paladin Labs and Sunovion Pharmaceuticals.

I, the Submitting Author has the right to grant and does grant on behalf of all authors of the Work (as defined in the below author licence), an exclusive licence and/or a non-exclusive licence for contributions from authors who are: i) UK Crown employees; ii) where BMJ has agreed a CC-BY licence shall apply, and/or iii) in accordance with the terms applicable for US Federal Government officers or employees acting as part of their official duties; on a worldwide, perpetual, irrevocable, royalty-free basis to BMJ Publishing Group Ltd (“BMJ”) its licensees and where the relevant Journal is co-owned by BMJ to the co-owners of the Journal, to publish the Work in BMJ Medicine and any other BMJ products and to exploit all rights, as set out in our licence.

The Submitting Author accepts and understands that any supply made under these terms is made by BMJ to the Submitting Author unless you are acting as an employee on behalf of your employer or a postgraduate student of an affiliated institution which is paying any applicable article publishing charge (“APC”) for Open Access articles. Where the Submitting Author wishes to make the Work available on an Open Access basis (and intends to pay the relevant APC), the terms of reuse of such Open Access shall be governed by a Creative Commons licence – details of these licences and which Creative Commons licence will apply to this Work are set out in our licence referred to above.

### **Role of the funding source**

There was no funding source for this study.

### **Data availability statement**

Data extracted from individual studies are available upon reasonable request to the corresponding author. All other data relevant to the study are included in the article or uploaded as online supplemental information.

1  
2  
3  
4  
5 **Ethics statement**

6 Patient consent for publication not applicable.  
7  
8  
9

10 **Figure 1. PRISMA study flow diagram.**  
11  
12

13 **Figure 2. Meta-analyses comparing IVIG treatment to no IVIG treatment for the outcome**  
14 **mortality in A) all STSS patients; and B) the subset of STSS patients treated with**  
15 **clindamycin. Please note proportions are blank for study rows where we meta-analyzed**  
16 **adjusted odds ratios instead of crude proportions.**  
17  
18  
19  
20  
21  
22  
23  
24  
25  
26  
27  
28  
29  
30  
31  
32  
33  
34  
35  
36  
37  
38  
39  
40  
41  
42  
43  
44  
45  
46  
47  
48  
49  
50  
51  
52  
53  
54  
55  
56  
57  
58  
59  
60



## References

1. Schmitz, M., et al., *Streptococcal toxic shock syndrome in the intensive care unit*. *Annals of intensive care*, 2018. **8**(1): p. 88-88.
2. O'Loughlin, R.E., et al., *The epidemiology of invasive group A streptococcal infection and potential vaccine implications: United States, 2000-2004*. *Clin Infect Dis*, 2007. **45**(7): p. 853-62.
3. Canada, G.o., *Group A Streptococcal diseases: For health professionals*. <https://www.canada.ca/en/public-health/services/diseases/group-a-streptococcal-diseases/health-professionals.html>, 2019.
4. Davies, H.D., et al., *Invasive Group A Streptococcal Infections in Ontario, Canada*. *New England Journal of Medicine*, 1996. **335**(8): p. 547-554.
5. Adalat, S., et al., *Toxic shock syndrome surveillance in UK children*. *Arch Dis Child*, 2014. **99**(12): p. 1078-82.
6. Carapetis, J.R., et al., *Effectiveness of clindamycin and intravenous immunoglobulin, and risk of disease in contacts, in invasive group a streptococcal infections*. *Clin Infect Dis*, 2014. **59**(3): p. 358-65.
7. Darenberg, J., et al., *Intravenous immunoglobulin G therapy in streptococcal toxic shock syndrome: a European randomized, double-blind, placebo-controlled trial*. *Clin Infect Dis*, 2003. **37**(3): p. 333-40.
8. Kadri, S.S., et al., *Impact of Intravenous Immunoglobulin on Survival in Necrotizing Fasciitis With Vasopressor-Dependent Shock: A Propensity Score-Matched Analysis From 130 US Hospitals*. *Clin Infect Dis*, 2017. **64**(7): p. 877-885.
9. Kaul, R., et al., *Population-based surveillance for group A streptococcal necrotizing fasciitis: Clinical features, prognostic indicators, and microbiologic analysis of seventy-seven cases. Ontario Group A Streptococcal Study*. *Am J Med*, 1997. **103**(1): p. 18-24.
10. Kaul, R., et al., *Intravenous immunoglobulin therapy for streptococcal toxic shock syndrome--a comparative observational study. The Canadian Streptococcal Study Group*. *Clin Infect Dis*, 1999. **28**(4): p. 800-7.
11. Linnér, A., et al., *Clinical efficacy of polyspecific intravenous immunoglobulin therapy in patients with streptococcal toxic shock syndrome: a comparative observational study*. *Clin Infect Dis*, 2014. **59**(6): p. 851-7.
12. Madsen, M.B., et al., *Immunoglobulin G for patients with necrotising soft tissue infection (INSTINCT): a randomised, blinded, placebo-controlled trial*. *Intensive Care Med*, 2017. **43**(11): p. 1585-1593.
13. Mehta, S., et al., *Morbidity and mortality of patients with invasive group A streptococcal infections admitted to the ICU*. *Chest*, 2006. **130**(6): p. 1679-86.
14. Shah, S.S., et al., *Intravenous immunoglobulin in children with streptococcal toxic shock syndrome*. *Clin Infect Dis*, 2009. **49**(9): p. 1369-76.
15. York., C.f.R.a.D.U.o., *PROSPERO. International prospective register of systematic reviews*. <<http://www.crd.york.ac.uk/PROSPERO/>>. 2017.
16. Jessica Bartoszko, Z.E., Dominik Mertz, Lehana Thabane, Mark Loeb., *Natural History and Prognosis of Streptococcal Toxic Shock Syndrome: Systematic Review and Meta-*

- 1  
2  
3  
4  
5  
6  
7  
8  
9  
10  
11  
12  
13  
14  
15  
16  
17  
18  
19  
20  
21  
22  
23  
24  
25  
26  
27  
28  
29  
30  
31  
32  
33  
34  
35  
36  
37  
38  
39  
40  
41  
42  
43  
44  
45  
46  
47  
48  
49  
50  
51  
52  
53  
54  
55  
56  
57  
58  
59  
60
- Analysis*. Available from:  
[https://www.crd.york.ac.uk/prospero/display\\_record.php?ID=CRD42020166961](https://www.crd.york.ac.uk/prospero/display_record.php?ID=CRD42020166961), 2020.
17. Moher, D., et al., *Preferred reporting items for systematic reviews and meta-analyses: the PRISMA statement*. *BMJ*, 2009. **339**: p. b2535.
  18. Stroup, D.F., et al., *Meta-analysis of observational studies in epidemiology: a proposal for reporting*. *Meta-analysis Of Observational Studies in Epidemiology (MOOSE) group*. *Jama*, 2000. **283**(15): p. 2008-12.
  19. Practice, B.B., *Study design search filters*.  
<https://bestpractice.bmj.com/info/toolkit/learn-ebm/study-design-search-filters/>.
  20. Sterne, J.A.C., et al., *Recommendations for examining and interpreting funnel plot asymmetry in meta-analyses of randomised controlled trials*. *BMJ*, 2011. **343**: p. d4002.
  21. Morrison, A., et al., *The effect of English-language restriction on systematic review-based meta-analyses: a systematic review of empirical studies*. *Int J Technol Assess Health Care*, 2012. **28**(2): p. 138-44.
  22. Moher, D., et al., *What contributions do languages other than English make on the results of meta-analyses?* *J Clin Epidemiol*, 2000. **53**(9): p. 964-72.
  23. Canada, G.o., *National case definition: Invasive group A streptococcal disease*. 2008.
  24. Ouzzani, M., et al., *Rayyan—a web and mobile app for systematic reviews*. *Systematic Reviews*, 2016. **5**(1): p. 210.
  25. Hayden, J.A., et al., *Assessing bias in studies of prognostic factors*. *Ann Intern Med*, 2013. **158**(4): p. 280-6.
  26. Guyatt, G., et al., *GRADE guidelines: 1. Introduction-GRADE evidence profiles and summary of findings tables*. (1878-5921 (Electronic)).
  27. Huguet, A., et al., *Judging the quality of evidence in reviews of prognostic factor research: adapting the GRADE framework*. *Systematic Reviews*, 2013. **2**(1): p. 71.
  28. *Cochrane Style Manual: Common terms and terminology*. Available from:  
<https://community.cochrane.org/style-manual/names-common-terms-and-terminology/common-terms-and-terminology>.
  29. Guyatt, R.S.a.G. *What is GRADE?* *BMJ Best Practice*.
  30. Viechtbauer, W., *Conducting Meta-Analyses in R with the metafor Package*. *Journal of Statistical Software*; Vol 1, Issue 3 (2010), 2010.
  31. Higgins JP, G.S., *Cochrane handbook for systematic reviews of interventions version 5.1.0 (updated March 2011)*. The Cochrane Collaboration , 2011. [handbook.cochrane.org](http://handbook.cochrane.org), 2011.
  32. Hozo, S.P., B. Djulbegovic, and I. Hozo, *Estimating the mean and variance from the median, range, and the size of a sample*. *BMC Medical Research Methodology*, 2005. **5**(1): p. 13.
  33. Wan, X., et al., *Estimating the sample mean and standard deviation from the sample size, median, range and/or interquartile range*. *BMC Medical Research Methodology*, 2014. **14**(1): p. 135.
  34. Efthimiou, O., *Practical guide to the meta-analysis of rare events*. *Evidence Based Mental Health*, 2018. **21**(2): p. 72.
  35. Barnham, M.R., et al., *Streptococcal toxic shock syndrome: a description of 14 cases from North Yorkshire, UK*. *Clin Microbiol Infect*, 2002. **8**(3): p. 174-81.

- 1
- 2
- 3
- 4 36. Stegmayr, B., et al., *Septic shock induced by group A streptococcal infection: clinical and*
- 5 *therapeutic aspects*. Scand J Infect Dis, 1992. **24**(5): p. 589-97.
- 6 37. Abuhammour, W., R.A. Hasan, and E. Unuvar, *Group A beta-hemolytic streptococcal*
- 7 *bacteremia*. Indian J Pediatr, 2004. **71**(10): p. 915-9.
- 8 38. Al-ajmi, J.A., et al., *Group A Streptococcus Toxic Shock Syndrome: An outbreak report*
- 9 *and review of the literature*. J Infect Public Health, 2012. **5**(6): p. 388-93.
- 10 39. Bernaldo de Quirós, J.C., et al., *Group A streptococcal bacteremia. A 10-year prospective*
- 11 *study*. Medicine (Baltimore), 1997. **76**(4): p. 238-48.
- 12 40. Brogan, T.V., et al., *Group A streptococcal necrotizing fasciitis complicating primary*
- 13 *varicella: a series of fourteen patients*. Pediatr Infect Dis J, 1995. **14**(7): p. 588-94.
- 14 41. Butragueño Laiseca, L., et al., *Toxic shock syndrome in a paediatric intensive care unit*
- 15 *over the last 15 years*. Anales de Pediatría (English Edition), 2017. **87**(2): p. 111-113.
- 16 42. Carapetis, J., et al., *Increasing severity of invasive group A streptococcal disease in*
- 17 *Australia: clinical and molecular epidemiological features and identification of a new*
- 18 *virulent M-nontypeable clone*. Clin Infect Dis, 1995. **21**(5): p. 1220-7.
- 19 43. Cimolai, N., et al., *Invasive Streptococcus pyogenes infections in children*. Can J Public
- 20 *Health*, 1992. **83**(3): p. 230-3.
- 21 44. Cook, A., et al., *Manifestations of Toxic Shock Syndrome in Children, Columbus, Ohio,*
- 22 *USA, 2010-2017(1)*. Emerging infectious diseases, 2020. **26**(6): p. 1077-1083.
- 23 45. Cowan, M.R., et al., *Serious group A beta-hemolytic streptococcal infections*
- 24 *complicating varicella*. Ann Emerg Med, 1994. **23**(4): p. 818-22.
- 25 46. Crum, N.F., et al., *A case series of group A Streptococcus necrotizing fasciitis in military*
- 26 *trainees*. Mil Med, 2004. **169**(5): p. 373-5.
- 27 47. Dahl, P.R., et al., *Fulminant group A streptococcal necrotizing fasciitis: clinical and*
- 28 *pathologic findings in 7 patients*. J Am Acad Dermatol, 2002. **47**(4): p. 489-92.
- 29 48. Donaldson, P.M., et al., *Rapidly fatal necrotising fasciitis caused by Streptococcus*
- 30 *pyogenes*. Journal of clinical pathology, 1993. **46**(7): p. 617-620.
- 31 49. Erdem, G., et al., *Characterization of a community cluster of group a streptococcal*
- 32 *invasive disease in Maui, Hawaii*. The Pediatric infectious disease journal, 2004. **23**(7): p.
- 33 677-679.
- 34 50. Eriksson, B.K., et al., *Invasive group A streptococcal infections: T1M1 isolates expressing*
- 35 *pyrogenic exotoxins A and B in combination with selective lack of toxin-neutralizing*
- 36 *antibodies are associated with increased risk of streptococcal toxic shock syndrome*. J
- 37 *Infect Dis*, 1999. **180**(2): p. 410-8.
- 38 51. Forni, A.L., et al., *Clinical and microbiological characteristics of severe group A*
- 39 *streptococcus infections and streptococcal toxic shock syndrome*. Clin Infect Dis, 1995.
- 40 **21**(2): p. 333-40.
- 41 52. Fronhoffs, S., et al., *The effect of C1-esterase inhibitor in definite and suspected*
- 42 *streptococcal toxic shock syndrome. Report of seven patients*. Intensive Care Med, 2000.
- 43 **26**(10): p. 1566-70.
- 44 53. Hasegawa, T., et al., *Factors determining prognosis in streptococcal toxic shock-like*
- 45 *syndrome: results of a nationwide investigation in Japan*. Microbes Infect, 2004. **6**(12): p.
- 46 1073-7.
- 47
- 48
- 49
- 50
- 51
- 52
- 53
- 54
- 55
- 56
- 57
- 58
- 59
- 60

- 1
  - 2
  - 3
  - 4
  - 5
  - 6
  - 7
  - 8
  - 9
  - 10
  - 11
  - 12
  - 13
  - 14
  - 15
  - 16
  - 17
  - 18
  - 19
  - 20
  - 21
  - 22
  - 23
  - 24
  - 25
  - 26
  - 27
  - 28
  - 29
  - 30
  - 31
  - 32
  - 33
  - 34
  - 35
  - 36
  - 37
  - 38
  - 39
  - 40
  - 41
  - 42
  - 43
  - 44
  - 45
  - 46
  - 47
  - 48
  - 49
  - 50
  - 51
  - 52
  - 53
  - 54
  - 55
  - 56
  - 57
  - 58
  - 59
  - 60
54. Hayata, E., et al., *Nationwide study of mortality and survival in pregnancy-related streptococcal toxic shock syndrome*. The journal of obstetrics and gynaecology research, 2021. **47**(3): p. 928-934.
55. Huang, Y.C., et al., *A family cluster of streptococcal toxic shock syndrome in children: clinical implication and epidemiological investigation*. Pediatrics, 2001. **107**(5): p. 1181-3.
56. Kansal, R.G., et al., *Inverse relation between disease severity and expression of the streptococcal cysteine protease, SpeB, among clonal M1T1 isolates recovered from invasive group A streptococcal infection cases*. Infect Immun, 2000. **68**(11): p. 6362-9.
57. Linder, K.A., et al., *Effect of underlying immune compromise on the manifestations and outcomes of group A streptococcal bacteremia*. J Infect, 2017. **74**(5): p. 450-455.
58. Luca-Harari, B., et al., *Clinical and microbiological characteristics of severe Streptococcus pyogenes disease in Europe*. J Clin Microbiol, 2009. **47**(4): p. 1155-65.
59. Nelson, G.E., et al., *Epidemiology of Invasive Group A Streptococcal Infections in the United States, 2005-2012*. Clin Infect Dis, 2016. **63**(4): p. 478-86.
60. Safar, A., et al., *Invasive Group A Streptococcal Infection and Vaccine Implications, Auckland, New Zealand*. Emerging Infectious Diseases, 2011. **17**(6): p. 983-989.
61. Schwartz, B., et al., *Clusters of invasive group A streptococcal infections in family, hospital, and nursing home settings*. Clin Infect Dis, 1992. **15**(2): p. 277-84.
62. Sriskandan, S. and J. Cohen, *Kallikrein-kinin system activation in streptococcal toxic shock syndrome*. Clin Infect Dis, 2000. **30**(6): p. 961-2.
63. Stockmann, C., et al., *Evolving epidemiologic characteristics of invasive group a streptococcal disease in Utah, 2002-2010*. Clin Infect Dis, 2012. **55**(4): p. 479-87.
64. Tagini, F., et al., *Importance of whole genome sequencing for the assessment of outbreaks in diagnostic laboratories: analysis of a case series of invasive Streptococcus pyogenes infections*. Eur J Clin Microbiol Infect Dis, 2017. **36**(7): p. 1173-1180.
65. Zachariadou, L., et al., *Differences in the epidemiology between paediatric and adult invasive Streptococcus pyogenes infections*. Epidemiol Infect, 2014. **142**(3): p. 512-9.
66. Stevens, D.L., et al., *Severe group A streptococcal infections associated with a toxic shock-like syndrome and scarlet fever toxin A*. N Engl J Med, 1989. **321**(1): p. 1-7.
67. Torimitsu, S., et al., *Streptococcal toxic shock syndrome with fatal outcome: Report on four forensic autopsy cases*. Leg Med (Tokyo), 2021. **50**: p. 101851.
68. Page, A.V., et al., *Systemic dysregulation of angiopoietin-1/2 in streptococcal toxic shock syndrome*. Clin Infect Dis, 2011. **52**(8): p. e157-61.
69. IntHout, J., et al., *Small studies are more heterogeneous than large ones: a meta-meta-analysis*. Journal of Clinical Epidemiology, 2015. **68**(8): p. 860-869.
70. Parks, T., et al., *Polyspecific Intravenous Immunoglobulin in Clindamycin-treated Patients With Streptococcal Toxic Shock Syndrome: A Systematic Review and Meta-analysis*. Clinical infectious diseases : an official publication of the Infectious Diseases Society of America, 2018. **67**(9): p. 1434-1436.
71. Legras, A., et al., *A multicentre case-control study of nonsteroidal anti-inflammatory drugs as a risk factor for severe sepsis and septic shock*. Critical Care, 2009. **13**(2): p. R43.

- 1  
2  
3 72. Bryant, A.E., et al., *The roles of injury and nonsteroidal anti-inflammatory drugs in the*  
4 *development and outcomes of severe group A streptococcal soft tissue infections.*  
5 *Current Opinion in Infectious Diseases*, 2015. **28**(3).  
6  
7  
8  
9  
10  
11  
12  
13  
14  
15  
16  
17  
18  
19  
20  
21  
22  
23  
24  
25  
26  
27  
28  
29  
30  
31  
32  
33  
34  
35  
36  
37  
38  
39  
40  
41  
42  
43  
44  
45  
46  
47  
48  
49  
50  
51  
52  
53  
54  
55  
56  
57  
58  
59  
60

1  
2  
3 **Figure 1. PRISMA study flow diagram.**  
4  
5  
6  
7

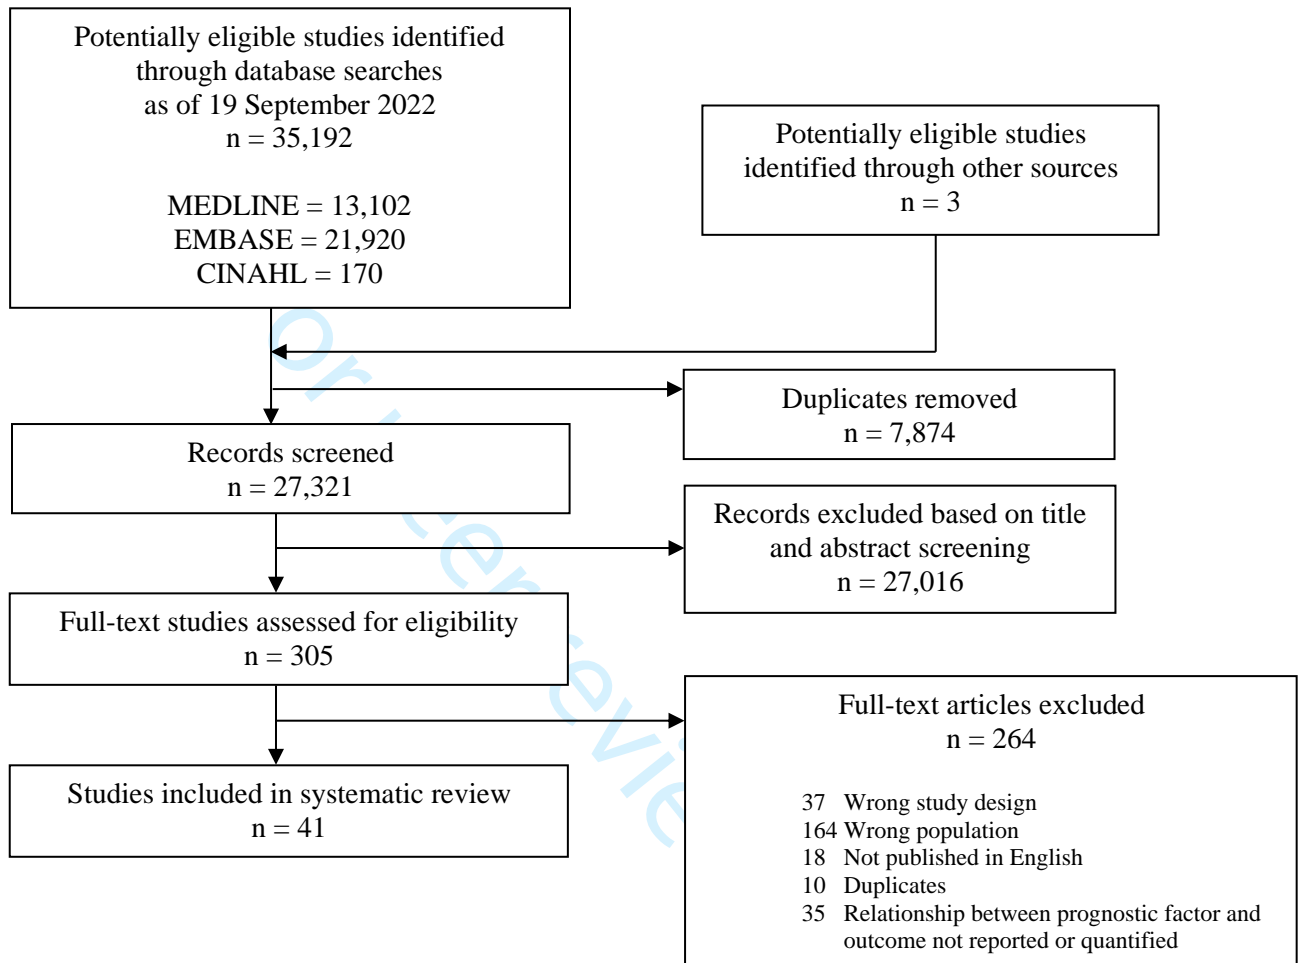

**Figure 2. Meta-analyses comparing IVIG treatment to no IVIG treatment for the outcome mortality in A) all STSS patients; and B) the subset of STSS patients treated with clindamycin. Please note proportions are blank for study rows where we meta-analyzed adjusted odds ratios instead of crude proportions.**

**A)**

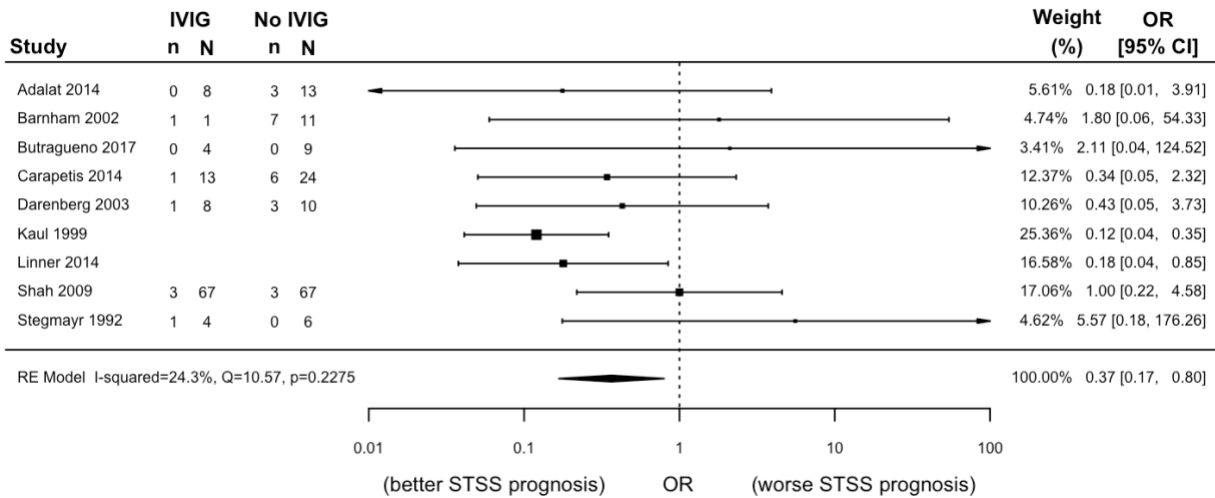

**B)**

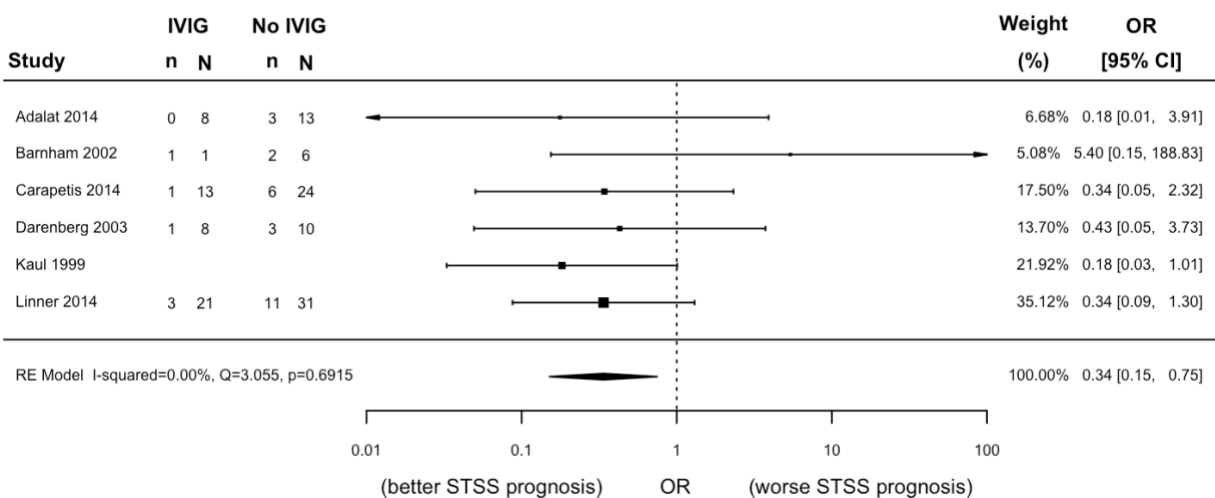

# PROGNOSTIC FACTORS FOR STREPTOCOCCAL TOXIC SHOCK SYNDROME: SYSTEMATIC REVIEW AND META-ANALYSIS

## Supplementary Material

| <b>Table of contents</b>                                       | <b>Page</b> |
|----------------------------------------------------------------|-------------|
| Search strategy                                                | 2           |
| GRADE assessment guidance                                      | 4           |
| Description of studies excluded at full text stage             | 6           |
| Additional study characteristics                               | 20          |
| Risk of bias assessment                                        | 27          |
| Forest plots for pairwise meta-analyses                        | 29          |
| Description of studies ineligible for meta-analysis by outcome | 44          |



## Search strategies

1) Database: OVID Medline Epub Ahead of Print, In-Process & Other Non-Indexed Citations, Ovid MEDLINE(R) Daily and Ovid MEDLINE(R) 1946 to Present

Search Strategy:

-----

- 1 toxic shock syndrome.mp. or exp Shock, Septic/ or STSS.mp. or streptococcal toxic shock syndrome.mp. or necrotizing fasciitis.mp. or exp Fasciitis, Necrotizing/ or septic shock.mp.
- 2 (group a streptococc\* or group A streptococc\* or pyogenes or streptococcus pyogenes).mp. or exp Streptococcus pyogenes/
- 3 exp Cohort Studies/
- 4 cohort\$.tw.
- 5 controlled clinical trial.pt.
- 6 epidemiologic methods/
- 7 limit 6 to yr=1966-1989
- 8 exp case-control studies/
- 9 (case\$ and control\$).tw.
- 10 (case\$ and series).tw.
- 11 or/3-5,7-10
- 12 randomized controlled trial.pt.
- 13 (random\$ or placebo\$ or single blind\$ or double blind\$ or triple blind\$).ti,ab.
- 14 (retraction of publication or retracted publication).pt.
- 15 or/12-14
- 16 (animals not humans).sh.
- 17 ((comment or editorial or meta-analysis or practice-guideline or review or letter) not randomized controlled trial).pt.
- 18 (random sampl\$ or random digit\$ or random effect\$ or random survey or random regression).ti,ab. not randomized controlled trial.pt.
- 19 15 not (16 or 17 or 18)
- 20 animals/ not humans/
- 21 (1 or 2) and (11 or 19)
- 22 21 not 20

2) Database: Embase <1974 to 2020 February 03>

Search Strategy:

-----

- 1 toxic shock syndrome.mp. or exp septic shock/ or STSS.mp. or streptococcal toxic shock syndrome.mp. or necrotizing fasciitis.mp. or exp necrotizing fasciitis/ or septic shock.mp. or exp toxic shock syndrome/
- 2 (group a streptococc\* or group A streptococc\* or pyogenes or streptococcus pyogenes).mp. or exp Streptococcus pyogenes/ or exp Streptococcus group A/
- 3 exp cohort analysis/
- 4 exp longitudinal study/
- 5 exp prospective study/

1  
2  
3 6 exp follow up/  
4 7 cohort\$.tw.  
5 8 exp case control study/ or (case\$ and control\$).tw.  
6 9 exp case study/ or (case\$ and series).tw.  
7 10 or/3-9  
8 11 (random\$ or placebo\$ or single blind\$ or double blind\$ or triple blind\$).ti,ab.  
9 12 RETRACTED ARTICLE/  
10 13 or/11-12  
11 14 (animal\$ not human\$).sh,hw.  
12 15 (book or conference paper or editorial or letter or review).pt. not exp randomized controlled  
13 trial/  
14 16 (random sampl\$ or random digit\$ or random effect\$ or random survey or random  
15 regression).ti,ab. not exp randomized controlled trial/  
16 17 13 not (14 or 15 or 16)  
17 18 exp animal/  
18 19 exp human/  
19 20 18 not 19  
20 21 (1 or 2) and (10 or 17)  
21 22 21 not 20  
22  
23  
24  
25  
26  
27  
28  
29  
30  
31  
32  
33  
34  
35  
36  
37  
38  
39  
40  
41  
42  
43  
44  
45  
46  
47  
48  
49  
50  
51  
52  
53  
54  
55  
56  
57  
58  
59  
60

## GRADE assessment guidance

Based on GRADE guidance for prognostic studies, we start with high certainty evidence for each meta-analysis.

### Risk of bias

For each meta-analysis, we downgraded the certainty of the evidence once for risk of bias when studies with moderate or high risk of bias contributed >50% weight to the pooled effect estimates or when studies providing unadjusted estimates contributed >50% weight to the pooled effect estimate (i.e. serious risk of bias). We downgraded the certainty of the evidence twice for risk of bias when studies with moderate or high risk of bias contributed >80% weight to the pooled effect estimates or when studies providing unadjusted estimates contributed >80% weight to the pooled effect estimate (i.e. very serious risk of bias).

### Inconsistency

We used visual inspection of the forest plots and the  $I^2$  statistic to assess inconsistency. For visual inspection of the forest plots, we considered the variability in point estimates and confidence interval overlap in relation to the null effect. Further, we downgraded the certainty of the evidence once when there was substantial ( $I^2$  50-90%) heterogeneity and twice when there was considerable ( $I^2$  75-100%) heterogeneity.

### Imprecision

We downgraded the certainty of the evidence once for imprecision if:

- 1) The effect on the patient, or clinical action, would differ depending on whether the upper or the lower boundary of the confidence interval represented the truth, **OR**
- 2) The 95% CI of the pooled absolute estimate crossed the null effect by less than 50 people per 1000 on one or both sides, **OR**
- 3) In cases where we had large effects that did not cross the null, we assessed the optimal information size. If the ratio of the upper to the lower limit of the confidence interval of the relative estimate was >3, the optimal information size would never be met; thus, we rated down once for imprecision, **OR**
- 4) There were fewer than 10 outcome events for each prognostic variable (for dichotomous outcomes, **OR**
- 5) There were fewer than 100 cases reaching endpoint (for continuous outcomes).

We downgraded the certainty of the evidence twice for imprecision if:

- 1) The 95% CI of the pooled absolute estimate crossed the null effect by more than 50 people per 1000 on both sides.

### Indirectness

We rated down once if the study sample, the prognostic factor, and/or the outcome in the primary studies did not accurately reflect the review question.

### Publication bias

We rated down once if:

- 1) Small studies reported higher rates compared to large studies, suggesting the selective publication of “positive” studies, **OR**

1  
2  
3 2) The value of the risk/protective factor in predicting the outcome has NOT been repetitively  
4 investigated (e.g. only exploratory studies with no external validation, replication or  
5 confirmation exist).  
6

## 7 8 **References**

- 9 1. Guyatt GH, Oxman AD, Kunz R, et al. GRADE Guidelines 6. Rating the Quality of  
10 Evidence—Imprecision. *J Clin Epidemiol* 2011; 64(12): 1283–93.  
11 <https://doi.org/10.1016/j.jclinepi.2011.01.012>
- 12 2. Hugueta A, Hayden JA, Stinson J, et al. Judging the quality of evidence in reviews of  
13 prognostic factor research: adapting the GRADE framework. *Syst Rev.* 2013;2:71.  
14 Published 2013 Sep 5. doi:10.1186/2046-4053-2-71  
15  
16  
17  
18  
19  
20  
21  
22  
23  
24  
25  
26  
27  
28  
29  
30  
31  
32  
33  
34  
35  
36  
37  
38  
39  
40  
41  
42  
43  
44  
45  
46  
47  
48  
49  
50  
51  
52  
53  
54  
55  
56  
57  
58  
59  
60

## Table of excluded full texts (n=264)

| Author, Year     | Title                                                                                                                                                               | Reason for Exclusion |
|------------------|---------------------------------------------------------------------------------------------------------------------------------------------------------------------|----------------------|
| Hamilton, 2013   | Pregnancy-related group a streptococcal infections: Temporal relationships between bacterial acquisition, infection onset, clinical findings, and outcome           | Wrong study design   |
| Ichiyama, 1997   | Transmission of Streptococcus pyogenes causing toxic shock-like syndrome among family members and confirmation by DNA macrorestriction analysis                     | Wrong study design   |
| Idubor, 2019     | Invasive group a streptococcus infections among residents of multiple nursing Homes-Denver, Colorado, 2017-2018                                                     | Wrong study design   |
| Ikebe, 2015      | Increased prevalence of group A streptococcus isolates in streptococcal toxic shock syndrome cases in Japan from 2010 to 2012                                       | Wrong study design   |
| Klinker, 1997    | Toxic shock syndrome in AIDS                                                                                                                                        | Wrong study design   |
| Langmuir, 1982   | Toxic-shock syndrome--an epidemiologist's view                                                                                                                      | Wrong study design   |
| McIvor, 1982     | Treatment of recurrent toxic shock syndrome with oral contraceptive agents                                                                                          | Wrong study design   |
| Pathi, 2013      | Prompt recognition and multidisciplinary approach in Group A streptococcal sepsis                                                                                   | Wrong study design   |
| Shah, 2015       | Role of intravenous immune globulin in streptococcal toxic shock syndrome and Clostridium difficile infection                                                       | Wrong study design   |
| Stallones, 1982  | A review of the epidemiologic studies of toxic shock syndrome                                                                                                       | Wrong study design   |
| Stevens, 2000    | Molecular epidemiology of nga and NAD glycohydrolase/ADP-ribosyltransferase activity among Streptococcus pyogenes causing streptococcal toxic shock syndrome        | Wrong study design   |
| Turner, 2015     | Emergence of a New Highly Successful Acapsular Group A Streptococcus Clade of Genotype emm89 in the United Kingdom                                                  | Wrong study design   |
| Udagawa, 1999    | Serious group A streptococcal infection around delivery                                                                                                             | Wrong study design   |
| Valiquette, 2006 | A survey of physician's attitudes regarding management of severe group A streptococcal infections                                                                   | Wrong study design   |
| Valiquette, 2009 | Assessing the impact of intravenous immunoglobulin in the management of streptococcal toxic shock syndrome: a noble but difficult quest                             | Wrong study design   |
| Wozniak, 2012    | M-protein gene-type distribution and hyaluronic acid capsule in group A Streptococcus clinical isolates in Chile: Association of emm gene markers with csrR alleles | Wrong study design   |
| Anonymous, 1984  | Diagnostic bias and toxic shock syndrome                                                                                                                            | Wrong study design   |
| Blonde, 2017     | A prospective multicentric study of severe cutaneous infections in pediatric intensive care: The SCIPIC cohort                                                      | Wrong study design   |
| Busowski, 2010   | Puerperal group A streptococci (GAS) infection: Reemergence of a dreaded disease - A case series                                                                    | Wrong study design   |
| Cimolai, 2002    | Nonhemolytic Streptococcus pyogenes causing invasive infection                                                                                                      | Wrong study design   |
| Clark, 2010      | Puerperal group a streptococcal sepsis and proinflammatory immune response                                                                                          | Wrong study design   |

|    |                       |                                                                                                                                                                                              |                    |
|----|-----------------------|----------------------------------------------------------------------------------------------------------------------------------------------------------------------------------------------|--------------------|
| 1  |                       |                                                                                                                                                                                              |                    |
| 2  |                       |                                                                                                                                                                                              |                    |
| 3  |                       |                                                                                                                                                                                              |                    |
| 4  | Dahdi, 2018           | Necrotizing soft tissue infection: Microbiological distribution from district region                                                                                                         | Wrong study design |
| 5  |                       |                                                                                                                                                                                              |                    |
| 6  | Das, 2012             | Necrotizing fasciitis in New Zealand - Risk factors, microbiological findings and outcomes in a large case series                                                                            | Wrong study design |
| 7  |                       |                                                                                                                                                                                              |                    |
| 8  | De Zoysa, 2013        | Invasive group A streptococcal disease in the UK, 2008-2012 and molecular characterisation of isolates during enhanced surveillance                                                          | Wrong study design |
| 9  |                       |                                                                                                                                                                                              |                    |
| 10 |                       |                                                                                                                                                                                              |                    |
| 11 | Donawa, 1984          | Toxic shock syndrome: chronology of state and federal epidemiologic studies and regulatory decision-making                                                                                   | Wrong study design |
| 12 |                       |                                                                                                                                                                                              |                    |
| 13 | Figueira, 2013        | Peri-ocular necrotising fasciitis: A multicentre retrospective australian series                                                                                                             | Wrong study design |
| 14 |                       |                                                                                                                                                                                              |                    |
| 15 | Gaensbauer, 2016      | Importance of toxic shock syndrome in pediatric septic shock clinical decision-making                                                                                                        | Wrong study design |
| 16 |                       |                                                                                                                                                                                              |                    |
| 17 | Goldberg, 2015        | Group A beta streptococcal infections in children after oral or dental trauma: A case series of 5 patients                                                                                   | Wrong study design |
| 18 |                       |                                                                                                                                                                                              |                    |
| 19 | McViety, 2014         | Don't forget IGAS: Lessons learnt from review of 2 peak seasons in the north west and North Wales, UK                                                                                        | Wrong study design |
| 20 |                       |                                                                                                                                                                                              |                    |
| 21 | Zangara, 2019         | Epidemiology, outcomes from treatment, and the spectrum of soft tissue infections over time in hospitalized patients: A populationbased description of inpatients in the state of california | Wrong study design |
| 22 |                       |                                                                                                                                                                                              |                    |
| 23 | Arias-Constanti, 2018 | Invasive disease by Streptococcus pyogenes: patients hospitalized for 6 years                                                                                                                | Wrong population   |
| 24 |                       |                                                                                                                                                                                              |                    |
| 25 | Hankins, 2008         | Factors that affect the clinical course of group A beta-haemolytic streptococcal infections of the hand and upper extremity: a retrospective study                                           | Wrong population   |
| 26 |                       |                                                                                                                                                                                              |                    |
| 27 | Henrichsen, 1997      | Invasive infections caused by Streptococcus pyogenes in Denmark 1990- 1994                                                                                                                   | Wrong population   |
| 28 |                       |                                                                                                                                                                                              |                    |
| 29 | Hoge, 1993            | The changing epidemiology of invasive group A streptococcal infections and the emergence of streptococcal toxic shock-like syndrome. A retrospective population-based study                  | Wrong population   |
| 30 |                       |                                                                                                                                                                                              |                    |
| 31 | Jauregui, 2015        | Life- and limb-threatening infections following the use of an external fixator                                                                                                               | Wrong population   |
| 32 |                       |                                                                                                                                                                                              |                    |
| 33 | Kadri, 2017           | Impact of Intravenous Immunoglobulin on Survival in Necrotizing Fasciitis With Vasopressor-Dependent Shock: A Propensity Score-Matched Analysis From 130 US Hospitals                        | Wrong population   |
| 34 |                       |                                                                                                                                                                                              |                    |
| 35 | Leggiadro, 1993       | Group A streptococcal bacteremia in a mid-south children's hospital                                                                                                                          | Wrong population   |
| 36 |                       |                                                                                                                                                                                              |                    |
| 37 | Madsen, 2019          | Patient's characteristics and outcomes in necrotising soft-tissue infections: results from a Scandinavian, multicentre, prospective cohort study                                             | Wrong population   |
| 38 |                       |                                                                                                                                                                                              |                    |
| 39 | Mitchell, 2011        | A strep in the wrong direction-invasive group a streptococcal disease                                                                                                                        | Wrong population   |
| 40 |                       |                                                                                                                                                                                              |                    |
| 41 | Moses, 1995           | Group A streptococcus bacteremia at the Hadassah Medical Center in Jerusalem                                                                                                                 | Wrong population   |
| 42 |                       |                                                                                                                                                                                              |                    |
| 43 | Mosites, 2017         | Use of single-dose azithromycin to control a community outbreak of EMM26.3 group a streptococcus invasive disease-Alaska, 2017                                                               | Wrong population   |
| 44 |                       |                                                                                                                                                                                              |                    |
| 45 | Mosites, 2019         | Risk for invasive streptococcal infections among adults experiencing homelessness, anchorage, Alaska, USA, 2002-2015                                                                         | Wrong population   |
| 46 |                       |                                                                                                                                                                                              |                    |
| 47 |                       |                                                                                                                                                                                              |                    |
| 48 |                       |                                                                                                                                                                                              |                    |
| 49 |                       |                                                                                                                                                                                              |                    |
| 50 |                       |                                                                                                                                                                                              |                    |
| 51 |                       |                                                                                                                                                                                              |                    |
| 52 |                       |                                                                                                                                                                                              |                    |
| 53 |                       |                                                                                                                                                                                              |                    |
| 54 |                       |                                                                                                                                                                                              |                    |
| 55 |                       |                                                                                                                                                                                              |                    |
| 56 |                       |                                                                                                                                                                                              |                    |
| 57 |                       |                                                                                                                                                                                              |                    |
| 58 |                       |                                                                                                                                                                                              |                    |
| 59 |                       |                                                                                                                                                                                              |                    |
| 60 |                       |                                                                                                                                                                                              |                    |

|                |                                                                                                                                                                            |                  |
|----------------|----------------------------------------------------------------------------------------------------------------------------------------------------------------------------|------------------|
| Mulla, 2007    | Clinical and epidemiologic features of invasive group A streptococcal infections in children                                                                               | Wrong population |
| Mulla, 2003    | Invasive group A streptococcal infections in Florida                                                                                                                       | Wrong population |
| Navarro, 1993  | A comparison of Streptococcus pyogenes (group A streptococcal) bacteremia at an urban and a suburban hospital. The importance of intravenous drug use                      | Wrong population |
| Norton, 2004   | Invasive group A streptococcal disease in North Queensland (1996 - 2001)                                                                                                   | Wrong population |
| Nuwayhid, 2007 | Blunt Trauma as a Risk Factor for Group A Streptococcal Necrotizing Fasciitis                                                                                              | Wrong population |
| Oliver, 2019   | Invasive group A Streptococcus disease in Australian children: 2016 to 2018 - a descriptive cohort study                                                                   | Wrong population |
| Oliver, 2019   | Recent trends in invasive group A Streptococcus disease in Victoria                                                                                                        | Wrong population |
| Peterson, 1996 | Risk factors for invasive group A streptococcal infections in children with varicella: A case-control study                                                                | Wrong population |
| Rainbow, 2008  | Invasive group A streptococcal disease in nursing homes, Minnesota, 1995-2006                                                                                              | Wrong population |
| Rathore, 1992  | Suppurative group A beta-hemolytic streptococcal infections in children                                                                                                    | Wrong population |
| Reingold, 1984 | Epidemiology of toxic-shock syndrome, United States, 1960-1984                                                                                                             | Wrong population |
| Reingold, 1989 | Risk factors for menstrual toxic shock syndrome: results of a multistate case-control study                                                                                | Wrong population |
| Remy, 2019     | Septic shock and toxic shock syndrome-two infectious shocks with different immune response                                                                                 | Wrong population |
| Rudolph, 2016  | Epidemiology of invasive group a streptococcal disease in Alaska, 2001 to 2013                                                                                             | Wrong population |
| Saldana, 2010  | Periorbital necrotizing fasciitis: Outcomes using a CT-guided surgical debridement approach                                                                                | Wrong population |
| Sarangi, 1995  | A nursing home outbreak of group A streptococcal infection: case control study of environmental contamination                                                              | Wrong population |
| Scaber, 2011   | Group a streptococcal infections during the seasonal influenza outbreak 2010/11 in South East England                                                                      | Wrong population |
| Scheuer, 2018  | Rising high rate of invasive group a streptococcus infections among persons experiencing homelessness in San Francisco, 2010-2017                                          | Wrong population |
| Schlech, 1982  | Risk factors for development of toxic shock syndrome. Association with a tampon brand                                                                                      | Wrong population |
| Schwartz, 1989 | Nonmenstrual toxic shock syndrome associated with barrier contraceptives: report of a case-control study                                                                   | Wrong population |
| Shands, 1982   | Toxic shock syndrome: Case-control studies at the centers for disease control                                                                                              | Wrong population |
| Sharma, 2019   | Real-time whole genome sequencing to control a Streptococcus pyogenes outbreak at a national orthopaedic hospital                                                          | Wrong population |
| Sierra, 2006   | Group A streptococcal infections in injection drug users in Barcelona, Spain: Epidemiologic, clinical, and microbiologic analysis of 3 clusters of cases from 2000 to 2003 | Wrong population |

|    |                        |                                                                                                                                                                                             |                  |
|----|------------------------|---------------------------------------------------------------------------------------------------------------------------------------------------------------------------------------------|------------------|
| 1  |                        |                                                                                                                                                                                             |                  |
| 2  |                        |                                                                                                                                                                                             |                  |
| 3  |                        |                                                                                                                                                                                             |                  |
| 4  |                        | The importance of serum creatine phosphokinase level in the                                                                                                                                 |                  |
| 5  | Simonart, 2004         | early diagnosis and microbiological evaluation of necrotizing fasciitis                                                                                                                     | Wrong population |
| 6  |                        |                                                                                                                                                                                             |                  |
| 7  | Smith, 2003            | Mass antibiotic treatment for group A streptococcus outbreaks in two long-term care facilities                                                                                              | Wrong population |
| 8  |                        |                                                                                                                                                                                             |                  |
| 9  | Spargen, 2011          | Proinflammatory immune response and puerperal group a streptococcal sepsis                                                                                                                  | Wrong population |
| 10 |                        |                                                                                                                                                                                             |                  |
| 11 | Steer, 2009            | Prospective surveillance of invasive group A streptococcal disease, fiji, 2005-2007                                                                                                         | Wrong population |
| 12 |                        |                                                                                                                                                                                             |                  |
| 13 | Steer, 2008            | High burden of invasive beta-haemolytic streptococcal infections in Fiji                                                                                                                    | Wrong population |
| 14 |                        |                                                                                                                                                                                             |                  |
| 15 | Tanna, 2006            | Molecular characterization of clinical isolates of M non-typable group A streptococci from invasive disease cases                                                                           | Wrong population |
| 16 |                        |                                                                                                                                                                                             |                  |
| 17 | Tapiainen, 2016        | Invasive Group A Streptococcal Infections in Children: A Nationwide Survey in Finland                                                                                                       | Wrong population |
| 18 |                        |                                                                                                                                                                                             |                  |
| 19 | Thanert, 2019          | Molecular profiling of tissue biopsies reveals unique signatures associated with streptococcal necrotizing soft tissue infections                                                           | Wrong population |
| 20 |                        |                                                                                                                                                                                             |                  |
| 21 | Theis, 2002            | Severe necrotising soft tissue infections in orthopaedic surgery                                                                                                                            | Wrong population |
| 22 |                        |                                                                                                                                                                                             |                  |
| 23 | Thigpen, 2007          | Nursing home outbreak of invasive group A streptococcal infections caused by 2 distinct strains                                                                                             | Wrong population |
| 24 |                        |                                                                                                                                                                                             |                  |
| 25 | Urbina, 2019           | Early identification of patients at high risk of group A streptococcus-associated necrotizing skin and soft tissue infections: a retrospective cohort study                                 | Wrong population |
| 26 |                        |                                                                                                                                                                                             |                  |
| 27 | Vasant, 2019           | Mass prophylaxis in an outbreak of invasive group A streptococcal disease in a residential aged care facility                                                                               | Wrong population |
| 28 |                        |                                                                                                                                                                                             |                  |
| 29 | Vlaminckx, 2005        | Long-term surveillance of invasive group A streptococcal disease in The Netherlands, 1994-2003                                                                                              | Wrong population |
| 30 |                        |                                                                                                                                                                                             |                  |
| 31 | Vugia, 1996            | Invasive group A streptococcal infections in children with varicella in Southern California                                                                                                 | Wrong population |
| 32 |                        |                                                                                                                                                                                             |                  |
| 33 | Waldhausen, 1996       | Surgical implications of necrotizing fasciitis in children with chickenpox                                                                                                                  | Wrong population |
| 34 |                        |                                                                                                                                                                                             |                  |
| 35 | Watanabe-Ohnishi, 1995 | Selective depletion of V beta-bearing T cells in patients with severe invasive group A streptococcal infections and streptococcal toxic shock syndrome. Ontario Streptococcal Study Project | Wrong population |
| 36 |                        |                                                                                                                                                                                             |                  |
| 37 | Wheeler, 1991          | Outbreak of group A streptococcus septicemia in children: Clinical, epidemiologic, and microbiological correlates                                                                           | Wrong population |
| 38 |                        |                                                                                                                                                                                             |                  |
| 39 | Wilson, 1995           | Group A streptococcal necrotizing fasciitis following varicella in children: Case reports and review                                                                                        | Wrong population |
| 40 |                        |                                                                                                                                                                                             |                  |
| 41 | Wong, 2019             | A Cluster of Pediatric Invasive Group A Streptococcus Disease in Melbourne, Australia, Coinciding with a High-Burden Influenza Season                                                       | Wrong population |
| 42 |                        |                                                                                                                                                                                             |                  |
| 43 | Yagupsky, 1987         | Group A beta-hemolytic streptococcal bacteremia in children                                                                                                                                 | Wrong population |
| 44 |                        |                                                                                                                                                                                             |                  |
| 45 | Zerr, 1999             | A case-control study of necrotizing fasciitis during primary varicella                                                                                                                      | Wrong population |
| 46 |                        |                                                                                                                                                                                             |                  |
| 47 | Zimbelman, 1999        | Improved outcome of clindamycin compared with beta-lactam antibiotic treatment for invasive Streptococcus pyogenes infection                                                                | Wrong population |
| 48 |                        |                                                                                                                                                                                             |                  |
| 49 |                        |                                                                                                                                                                                             |                  |
| 50 |                        |                                                                                                                                                                                             |                  |
| 51 |                        |                                                                                                                                                                                             |                  |
| 52 |                        |                                                                                                                                                                                             |                  |
| 53 |                        |                                                                                                                                                                                             |                  |
| 54 |                        |                                                                                                                                                                                             |                  |
| 55 |                        |                                                                                                                                                                                             |                  |
| 56 |                        |                                                                                                                                                                                             |                  |
| 57 |                        |                                                                                                                                                                                             |                  |
| 58 |                        |                                                                                                                                                                                             |                  |
| 59 |                        |                                                                                                                                                                                             |                  |
| 60 |                        |                                                                                                                                                                                             |                  |



|    |                      |                                                                                                                                                                                      |                  |
|----|----------------------|--------------------------------------------------------------------------------------------------------------------------------------------------------------------------------------|------------------|
| 1  |                      |                                                                                                                                                                                      |                  |
| 2  |                      |                                                                                                                                                                                      |                  |
| 3  |                      |                                                                                                                                                                                      |                  |
| 4  |                      | Distribution of emm types of beta hemolytic streptococci associated with necrotizing fasciitis: Clinical profile and outcome                                                         |                  |
| 5  | Abraham, 2016        |                                                                                                                                                                                      | Wrong population |
| 6  |                      | Severe Maternal Sepsis in the UK, 2011-2012: A National Case-Control Study                                                                                                           |                  |
| 7  | Acosta, 2014         |                                                                                                                                                                                      | Wrong population |
| 8  |                      | Investigation into an outbreak of invasive Group A Streptococcal (iGAS) infection at a general hospital in 2010                                                                      |                  |
| 9  | Adams, 2010          |                                                                                                                                                                                      | Wrong population |
| 10 |                      | Identification of invasive streptococcal disease in a pediatric and infant death Cohort-Iowa, 2007-2008                                                                              |                  |
| 11 | Adem, 2009           |                                                                                                                                                                                      | Wrong population |
| 12 |                      | Acute necrotizing fasciitis in Egyptian patients: A case series                                                                                                                      |                  |
| 13 | Afifi, 2008          |                                                                                                                                                                                      | Wrong population |
| 14 |                      | Group A Streptococcal bacteraemia. Experience at King Fahad Medical City in Riyadh, Saudi Arabia                                                                                     |                  |
| 15 | Al-Khadidi, 2017     |                                                                                                                                                                                      | Wrong population |
| 16 |                      | Necrotising fasciitis: A series of seven cases                                                                                                                                       |                  |
| 17 | Alva, 2013           |                                                                                                                                                                                      | Wrong population |
| 18 |                      | Summaries for patients. Invasive streptococcal infections in hospitals in Ontario, Canada, 1992 to 2000                                                                              |                  |
| 19 | Anonymous, 2007      |                                                                                                                                                                                      | Wrong population |
| 20 |                      | Postpartum invasive group A streptococcal disease in the modern era                                                                                                                  |                  |
| 21 | Aronoff, 2008        |                                                                                                                                                                                      | Wrong population |
| 22 |                      | Pivotal Role of Preexisting Pathogen-Specific Antibodies in the Development of Necrotizing Soft-Tissue Infections                                                                    |                  |
| 23 | Babbar, 2018         |                                                                                                                                                                                      | Wrong population |
| 24 |                      | A serological evaluation of the host immune response during Necrotizing Soft Tissue Infections caused by Streptococcus pyogenes                                                      |                  |
| 25 | Babbar, 2016         |                                                                                                                                                                                      | Wrong population |
| 26 |                      | Impact of adjunctive clindamycin in invasive beta-hemolytic streptococcal infections: A propensity score-matched analysis of 1956 beta-lactam treated patients from 118 us hospitals |                  |
| 27 | Babiker, 2019        |                                                                                                                                                                                      | Wrong population |
| 28 |                      | Chemotherapy of acute bone and joint infections                                                                                                                                      |                  |
| 29 | Bajpai, 1977         |                                                                                                                                                                                      | Wrong population |
| 30 |                      | Bacteraemic Streptococcus pyogenes infection in the peripartum period: now a rare disease and prior carriage by the patient may be important                                         |                  |
| 31 | Barnham, 2001        |                                                                                                                                                                                      | Wrong population |
| 32 |                      | Risk factors in the pathogenesis of invasive group A streptococcal infections: Role of protective humoral immunity                                                                   |                  |
| 33 | Basma, 1999          |                                                                                                                                                                                      | Wrong population |
| 34 |                      | Maternal deaths due to sepsis in the state of Michigan, 1999-2006                                                                                                                    |                  |
| 35 | Bauer, 2015          |                                                                                                                                                                                      | Wrong population |
| 36 |                      | Invasive group A Streptococcus infections associated with liposuction surgery at outpatient facilities not subject to state or federal regulation                                    |                  |
| 37 | Beaudoin, 2014       |                                                                                                                                                                                      | Wrong population |
| 38 |                      | Postoperative complications followed by septoplasty comparison between conventional nasal packing and glove finger pack                                                              |                  |
| 39 | Beigh, 2012          |                                                                                                                                                                                      | Wrong population |
| 40 |                      | The relationship of tampon characteristics to menstrual toxic shock syndrome                                                                                                         |                  |
| 41 | Berkley, 1987        |                                                                                                                                                                                      | Wrong population |
| 42 |                      | Necrotizing fasciitis in children: diagnostic and therapeutic aspects                                                                                                                |                  |
| 43 | Bingol-Kologlu, 2007 |                                                                                                                                                                                      | Wrong population |
| 44 |                      | Necrotizing soft tissue infections caused by Streptococcus pyogenes and Streptococcus dysgalactiae subsp. equisimilis of groups C and G in western Norway                            |                  |
| 45 | Bruun, 2013          |                                                                                                                                                                                      | Wrong population |
| 46 |                      | Risk factors and Predictors of Mortality in Streptococcal Necrotizing Soft-Tissue Infections: A Multicenter Prospective Study                                                        |                  |
| 47 | Bruun, 2020          |                                                                                                                                                                                      | Wrong population |
| 48 |                      |                                                                                                                                                                                      |                  |
| 49 |                      |                                                                                                                                                                                      |                  |
| 50 |                      |                                                                                                                                                                                      |                  |
| 51 |                      |                                                                                                                                                                                      |                  |
| 52 |                      |                                                                                                                                                                                      |                  |
| 53 |                      |                                                                                                                                                                                      |                  |
| 54 |                      |                                                                                                                                                                                      |                  |
| 55 |                      |                                                                                                                                                                                      |                  |
| 56 |                      |                                                                                                                                                                                      |                  |
| 57 |                      |                                                                                                                                                                                      |                  |
| 58 |                      |                                                                                                                                                                                      |                  |
| 59 |                      |                                                                                                                                                                                      |                  |
| 60 |                      |                                                                                                                                                                                      |                  |

|    |                           |                                                                                                                                                              |                  |
|----|---------------------------|--------------------------------------------------------------------------------------------------------------------------------------------------------------|------------------|
| 1  |                           |                                                                                                                                                              |                  |
| 2  |                           |                                                                                                                                                              |                  |
| 3  |                           |                                                                                                                                                              |                  |
| 4  | Busowski, 2013            | Puerperal group a streptococcal infections: A case series and discussion                                                                                     | Wrong population |
| 5  |                           |                                                                                                                                                              |                  |
| 6  | Byer, 2006                | Clinical deterioration among patients with fever and erythroderma                                                                                            | Wrong population |
| 7  |                           |                                                                                                                                                              |                  |
| 8  | Centers for Disease, 1982 | Toxic-shock syndrome, United States, 1970-1982                                                                                                               | Wrong population |
| 9  |                           |                                                                                                                                                              |                  |
| 10 | Centers for Disease, 2011 | Invasive group A streptococcus in a skilled nursing facility-- Pennsylvania, 2009-2010                                                                       | Wrong population |
| 11 |                           |                                                                                                                                                              |                  |
| 12 | Chan, 2009                | Toxic shock syndrome and rhinosinusitis in children                                                                                                          | Wrong population |
| 13 |                           |                                                                                                                                                              |                  |
| 14 | Chen, 2011                | The microbiological profile and presence of bloodstream infection influence mortality rates in necrotizing fasciitis                                         | Wrong population |
| 15 |                           |                                                                                                                                                              |                  |
| 16 | Chen, 2015                | Clinical Characteristics and Risk Factor Analysis for Lower-Extremity Amputations in Diabetic Patients With Foot Ulcer Complicated by Necrotizing Fasciitis  | Wrong population |
| 17 |                           |                                                                                                                                                              |                  |
| 18 | Chen, 2018                | Macro- and Microvascular Parameters After Toxic Shock Syndrome                                                                                               | Wrong population |
| 19 |                           |                                                                                                                                                              |                  |
| 20 | Ching, 2019               | Prospective surveillance of pediatric invasive group A Streptococcus infection                                                                               | Wrong population |
| 21 |                           |                                                                                                                                                              |                  |
| 22 | Chiobotaru, 1997          | Changing epidemiology of invasive Streptococcus pyogenes infections in southern Israel: differences between two ethnic population groups                     | Wrong population |
| 23 |                           |                                                                                                                                                              |                  |
| 24 | Christie, 1988            | Bacteremia with group A streptococci in childhood                                                                                                            | Wrong population |
| 25 |                           |                                                                                                                                                              |                  |
| 26 | Corona, 2016              | Necrotising fasciitis of the extremities: implementation of new management technologies                                                                      | Wrong population |
| 27 |                           |                                                                                                                                                              |                  |
| 28 |                           |                                                                                                                                                              |                  |
| 29 | Daneman, 2007             | Surveillance for hospital outbreaks of invasive group a streptococcal infections in Ontario, Canada, 1992 to 2000                                            | Wrong population |
| 30 |                           |                                                                                                                                                              |                  |
| 31 | Daneman, 2005             | Hospital-acquired invasive group A streptococcal infections in Ontario, Canada, 1992-2000                                                                    | Wrong population |
| 32 |                           |                                                                                                                                                              |                  |
| 33 |                           |                                                                                                                                                              |                  |
| 34 | Davies, 1996              | Invasive group A streptococcal infections in Ontario, Canada. Ontario Group A Streptococcal Study Group                                                      | Wrong population |
| 35 |                           |                                                                                                                                                              |                  |
| 36 | Davis, 1982               | Toxic shock syndrome: a critique of the 1980 Wisconsin case-control study                                                                                    | Wrong population |
| 37 |                           |                                                                                                                                                              |                  |
| 38 | De Almeida Torres, 2013   | Group a streptococcus meningitis in children                                                                                                                 | Wrong population |
| 39 |                           |                                                                                                                                                              |                  |
| 40 |                           |                                                                                                                                                              |                  |
| 41 | Deutscher, 2011           | Incidence and severity of invasive Streptococcus pneumoniae, group A Streptococcus, and group B Streptococcus infections among pregnant and postpartum women | Wrong population |
| 42 |                           |                                                                                                                                                              |                  |
| 43 | Devaney, 2015             | Necrotising soft tissue infections: The effect of hyperbaric oxygen on mortality                                                                             | Wrong population |
| 44 |                           |                                                                                                                                                              |                  |
| 45 |                           |                                                                                                                                                              |                  |
| 46 | Dooling, 2013             | Investigation of a prolonged Group A Streptococcal outbreak among residents of a skilled nursing facility, Georgia, 2009-2012                                | Wrong population |
| 47 |                           |                                                                                                                                                              |                  |
| 48 | Dworkin, 2009             | The epidemiology of necrotizing fasciitis including factors associated with death and amputation                                                             | Wrong population |
| 49 |                           |                                                                                                                                                              |                  |
| 50 |                           |                                                                                                                                                              |                  |
| 51 | Eneli, 2007               | Epidemiology and Outcome of Necrotizing Fasciitis in Children: An Active Surveillance Study of the Canadian Paediatric Surveillance Program                  | Wrong population |
| 52 |                           |                                                                                                                                                              |                  |
| 53 | Factor, 2005              | Risk factors for pediatric invasive group A streptococcal disease                                                                                            | Wrong population |
| 54 |                           |                                                                                                                                                              |                  |
| 55 | Factor, 2003              | Invasive group a streptococcal disease: Risk factors for adults                                                                                              | Wrong population |
| 56 |                           |                                                                                                                                                              |                  |
| 57 |                           |                                                                                                                                                              |                  |
| 58 |                           |                                                                                                                                                              |                  |
| 59 |                           |                                                                                                                                                              |                  |
| 60 |                           |                                                                                                                                                              |                  |

|    |                    |                                                                                                                                                                    |                                                                               |
|----|--------------------|--------------------------------------------------------------------------------------------------------------------------------------------------------------------|-------------------------------------------------------------------------------|
| 1  |                    |                                                                                                                                                                    |                                                                               |
| 2  |                    |                                                                                                                                                                    |                                                                               |
| 3  |                    |                                                                                                                                                                    |                                                                               |
| 4  | Fauno Thrane, 2017 | Hyperbaric oxygen may only be optional in head and neck necrotizing fasciitis: a retrospective analysis of 43 cases and review of the literature                   | Wrong population                                                              |
| 5  |                    |                                                                                                                                                                    |                                                                               |
| 6  | Fichtenbaum, 1993  | Ehrlichiosis presenting as a life-threatening illness with features of the toxic shock syndrome                                                                    | Wrong population                                                              |
| 7  |                    |                                                                                                                                                                    |                                                                               |
| 8  | Flavahan, 2014     | Incidence of periorbital necrotising fasciitis in the UK population: A BOSU study                                                                                  | Wrong population                                                              |
| 9  |                    |                                                                                                                                                                    |                                                                               |
| 10 | Flores, 2019       | Capsule-negative EMM types are an increasing cause of pediatric group a streptococcal infections at a large pediatric hospital in Texas                            | Wrong population                                                              |
| 11 |                    |                                                                                                                                                                    |                                                                               |
| 12 | Frere, 2016        | Clinical and Microbiological Characteristics of Invasive Group A Streptococcal Infections Before and After Implementation of a Universal Varicella Vaccine Program | Wrong population                                                              |
| 13 |                    |                                                                                                                                                                    |                                                                               |
| 14 | Givner, 1998       | Invasive disease due to group A beta-hemolytic streptococci: Continued occurrence in children in North Carolina                                                    | Wrong population                                                              |
| 15 |                    |                                                                                                                                                                    |                                                                               |
| 16 | Givner, 1991       | Apparent increase in the incidence of invasive group A beta-hemolytic streptococcal disease in children                                                            | Wrong population                                                              |
| 17 |                    |                                                                                                                                                                    |                                                                               |
| 18 | Gooskens, 2005     | Streptococcal toxic shock syndrome by an iMLS resistant M type 77 Streptococcus pyogenes in the Netherlands                                                        | Wrong population                                                              |
| 19 |                    |                                                                                                                                                                    |                                                                               |
| 20 | Gonzalez, 1996     | Necrotizing fasciitis of the upper extremity                                                                                                                       | Wrong population                                                              |
| 21 |                    |                                                                                                                                                                    |                                                                               |
| 22 | Lesko, 2001        | Invasive group A streptococcal infection and nonsteroidal antiinflammatory drug use among children with primary varicella                                          | Wrong population                                                              |
| 23 |                    |                                                                                                                                                                    |                                                                               |
| 24 | Lin, 2013          | Group a streptococcal necrotizing fasciitis in the emergency department                                                                                            | Wrong population                                                              |
| 25 |                    |                                                                                                                                                                    |                                                                               |
| 26 | Lin, 2015          | Early Differentiation of Kawasaki Disease Shock Syndrome and Toxic Shock Syndrome in a Pediatric Intensive Care Unit                                               | Wrong population                                                              |
| 27 |                    |                                                                                                                                                                    |                                                                               |
| 28 | Parks, 2019        | Elevated risk of invasive group A streptococcal disease and host genetic variation in the human leucocyte antigen locus                                            | Wrong population                                                              |
| 29 |                    |                                                                                                                                                                    |                                                                               |
| 30 | Stromberg, 1991    | Outbreak of group A streptococcal bacteremia in Sweden: an epidemiologic and clinical study                                                                        | Wrong population                                                              |
| 31 |                    |                                                                                                                                                                    |                                                                               |
| 32 | Haggar, 2012       | Clinical and microbiologic characteristics of invasive Streptococcus pyogenes infections in north and south India                                                  | Relationship between prognostic factor and outcome not reported or quantified |
| 33 |                    |                                                                                                                                                                    |                                                                               |
| 34 | Laupland, 2000     | Invasive group A streptococcal disease in children and association with varicella-zoster virus infection. Ontario Group A Streptococcal Study Group                | Relationship between prognostic factor and outcome not reported or quantified |
| 35 |                    |                                                                                                                                                                    |                                                                               |
| 36 | Linnemann, 1986    | Increasing incidence of toxic shock syndrome in the 1970s                                                                                                          | Relationship between prognostic factor and outcome not reported or quantified |
| 37 |                    |                                                                                                                                                                    |                                                                               |
| 38 | Miday, 1988        | Toxic shock syndrome: incidence and geographic distribution from a hospital medical records reporting system                                                       | Relationship between prognostic factor and outcome not reported or quantified |
| 39 |                    |                                                                                                                                                                    |                                                                               |
| 40 | Mosites, 2018      | Outbreak of Invasive Infections from Subtype emm26.3 Group A Streptococcus among Homeless Adults-Anchorage, Alaska, 2016-2017                                      | Relationship between prognostic factor and outcome not reported or quantified |
| 41 |                    |                                                                                                                                                                    |                                                                               |
| 42 |                    |                                                                                                                                                                    |                                                                               |
| 43 |                    |                                                                                                                                                                    |                                                                               |
| 44 |                    |                                                                                                                                                                    |                                                                               |
| 45 |                    |                                                                                                                                                                    |                                                                               |
| 46 |                    |                                                                                                                                                                    |                                                                               |
| 47 |                    |                                                                                                                                                                    |                                                                               |
| 48 |                    |                                                                                                                                                                    |                                                                               |
| 49 |                    |                                                                                                                                                                    |                                                                               |
| 50 |                    |                                                                                                                                                                    |                                                                               |
| 51 |                    |                                                                                                                                                                    |                                                                               |
| 52 |                    |                                                                                                                                                                    |                                                                               |
| 53 |                    |                                                                                                                                                                    |                                                                               |
| 54 |                    |                                                                                                                                                                    |                                                                               |
| 55 |                    |                                                                                                                                                                    |                                                                               |
| 56 |                    |                                                                                                                                                                    |                                                                               |
| 57 |                    |                                                                                                                                                                    |                                                                               |
| 58 |                    |                                                                                                                                                                    |                                                                               |
| 59 |                    |                                                                                                                                                                    |                                                                               |
| 60 |                    |                                                                                                                                                                    |                                                                               |

|    |                        |                                                                                                                                                               |                                    |
|----|------------------------|---------------------------------------------------------------------------------------------------------------------------------------------------------------|------------------------------------|
| 1  |                        |                                                                                                                                                               |                                    |
| 2  |                        |                                                                                                                                                               |                                    |
| 3  |                        |                                                                                                                                                               |                                    |
| 4  |                        |                                                                                                                                                               | Relationship between               |
| 5  |                        |                                                                                                                                                               | prognostic factor and              |
| 6  | O'Grady, 2007          | The epidemiology of invasive group A streptococcal disease in Victoria, Australia                                                                             | outcome not reported or quantified |
| 7  |                        |                                                                                                                                                               |                                    |
| 8  |                        |                                                                                                                                                               | Relationship between               |
| 9  | Petitti, 1989          | Update through 1985 on the incidence of toxic shock syndrome among members of a prepaid health plan                                                           | outcome not reported or quantified |
| 10 |                        |                                                                                                                                                               |                                    |
| 11 |                        |                                                                                                                                                               | Relationship between               |
| 12 |                        |                                                                                                                                                               | prognostic factor and              |
| 13 | Pilon, 2019            | Invasive group A streptococcal infection outbreaks of typeemm118 in a long-term care facility, and of type emm74 in the homeless population, Montreal, Quebec | outcome not reported or quantified |
| 14 |                        |                                                                                                                                                               |                                    |
| 15 |                        |                                                                                                                                                               | Relationship between               |
| 16 |                        |                                                                                                                                                               | prognostic factor and              |
| 17 | Rantala, 2012          | Streptococcus pyogenes bacteraemia, emm types and superantigen profiles                                                                                       | outcome not reported or quantified |
| 18 |                        |                                                                                                                                                               |                                    |
| 19 |                        |                                                                                                                                                               | Relationship between               |
| 20 |                        |                                                                                                                                                               | prognostic factor and              |
| 21 | Tanner, 1981           | Toxic shock syndrome                                                                                                                                          | outcome not reported or quantified |
| 22 |                        |                                                                                                                                                               |                                    |
| 23 |                        |                                                                                                                                                               | Relationship between               |
| 24 |                        |                                                                                                                                                               | prognostic factor and              |
| 25 | Teatero, 2018          | Canada-Wide Epidemic of emm74 Group A Streptococcus Invasive Disease                                                                                          | outcome not reported or quantified |
| 26 |                        |                                                                                                                                                               |                                    |
| 27 |                        |                                                                                                                                                               | Relationship between               |
| 28 |                        |                                                                                                                                                               | prognostic factor and              |
| 29 | Todd, 1985             | Toxic shock syndrome. II. Estimated occurrence in Colorado as influenced by case ascertainment methods                                                        | outcome not reported or quantified |
| 30 |                        |                                                                                                                                                               |                                    |
| 31 |                        |                                                                                                                                                               | Relationship between               |
| 32 |                        |                                                                                                                                                               | prognostic factor and              |
| 33 | Tsai, 2014             | Correlation of virulence genes to clinical manifestations and outcome in patients with Streptococcus dysgalactiae subspecies equisimilis bacteremia           | outcome not reported or quantified |
| 34 |                        |                                                                                                                                                               |                                    |
| 35 |                        |                                                                                                                                                               | Relationship between               |
| 36 | Vallalta Morales, 2006 | Group A streptococcal bacteremia: outcome and prognostic factors                                                                                              | outcome not reported or quantified |
| 37 |                        |                                                                                                                                                               |                                    |
| 38 |                        |                                                                                                                                                               | Relationship between               |
| 39 |                        |                                                                                                                                                               | prognostic factor and              |
| 40 |                        |                                                                                                                                                               | outcome not reported or            |
| 41 | Vlaminckx, 2004        | Epidemiological features of invasive and noninvasive group A streptococcal disease in the Netherlands, 1992-1996                                              | quantified                         |
| 42 |                        |                                                                                                                                                               |                                    |
| 43 |                        |                                                                                                                                                               | Relationship between               |
| 44 |                        |                                                                                                                                                               | prognostic factor and              |
| 45 | Aydin, 2017            | Clinical indications of intravenous immunoglobulin use in pediatric infectious diseases clinic                                                                | outcome not reported or quantified |
| 46 |                        |                                                                                                                                                               |                                    |
| 47 |                        |                                                                                                                                                               | Relationship between               |
| 48 | Ben-Abraham, 2002      | Invasive group A streptococcal infections in a large tertiary center: epidemiology, characteristics and outcome                                               | outcome not reported or quantified |
| 49 |                        |                                                                                                                                                               |                                    |
| 50 |                        |                                                                                                                                                               | Relationship between               |
| 51 |                        |                                                                                                                                                               | prognostic factor and              |
| 52 | Bohicchio, 2001        | Group A Streptococcus (GAS) soft-tissue infections: a lethal organism on the rise                                                                             | outcome not reported or quantified |
| 53 |                        |                                                                                                                                                               |                                    |
| 54 |                        |                                                                                                                                                               | Relationship between               |
| 55 | Cancellara, 2016       | Multicenter study on invasive Streptococcus pyogenes infections in children in Argentina                                                                      | prognostic factor and              |
| 56 |                        |                                                                                                                                                               |                                    |
| 57 |                        |                                                                                                                                                               |                                    |
| 58 |                        |                                                                                                                                                               |                                    |
| 59 |                        |                                                                                                                                                               |                                    |
| 60 |                        |                                                                                                                                                               |                                    |

|                       |                                                                                                                                                      |                                                                               |
|-----------------------|------------------------------------------------------------------------------------------------------------------------------------------------------|-------------------------------------------------------------------------------|
|                       |                                                                                                                                                      | outcome not reported or quantified                                            |
| Chen, 2016            | Toxic shock syndrome in Australian children                                                                                                          | Relationship between prognostic factor and outcome not reported or quantified |
| Doctor, 1995          | Group A beta-hemolytic streptococcal bacteremia: historical overview, changing incidence, and recent association with varicella                      | Relationship between prognostic factor and outcome not reported or quantified |
| Eriksson, 2003        | Group A streptococcal infections in Sweden: a comparative study of invasive and noninvasive infections and analysis of dominant T28 emm28 isolates   | Relationship between prognostic factor and outcome not reported or quantified |
| Norrby-Teglund, 2003  | The treatment of severe group a streptococcal infections                                                                                             | Relationship between prognostic factor and outcome not reported or quantified |
| Rodriguez-Nunez, 2011 | Clinical characteristics of children with group A streptococcal toxic shock syndrome admitted to pediatric intensive care units                      | Relationship between prognostic factor and outcome not reported or quantified |
| Snall, 2016           | Differential neutrophil responses to bacterial stimuli: Streptococcal strains are potent inducers of heparin-binding protein and resistin-release    | Relationship between prognostic factor and outcome not reported or quantified |
| Eriksson, 1998        | Epidemiological and clinical aspects of invasive group A streptococcal infections and the streptococcal toxic shock syndrome                         | Relationship between prognostic factor and outcome not reported or quantified |
| Sahli, 2014           | Necrotizing fasciitis in diabetic patients: A report of 14 cases                                                                                     | Not in English                                                                |
| Arnholm, 2004         | High-dose immunoglobulin - Life-saving in invasive group a streptococcal infection                                                                   | Not in English                                                                |
| Caetano, 2010         | [S. Pyogenes invasive disease in a paediatric hospital: 1996-2009]                                                                                   | Not in English                                                                |
| Costa Orvay, 2007     | [Toxic shock syndrome: experience in a pediatric intensive care unit]                                                                                | Not in English                                                                |
| Dosil Gallardo, 2009  | [Streptococcal toxic shock syndrome: an emerging pathology?]                                                                                         | Not in English                                                                |
| Emmi, 1999            | Severe infection from invasive beta-hemolytic streptococcus group A. Three cases of toxic shock observed in resuscitation                            | Not in English                                                                |
| Faye, 2014            | Management of severe invasive group A streptococcal infections                                                                                       | Not in English                                                                |
| Floret, 2001          | Clinical aspects of staphylococcal and streptococcal toxic diseases                                                                                  | Not in English                                                                |
| Hua, 2018             | [Streptococcal toxic shock syndrome caused by Streptococcus pyogenes: a retrospective study of 15 pediatric cases]                                   | Not in English                                                                |
| Kach, 1993            | [Necrotizing soft tissue infections]                                                                                                                 | Not in English                                                                |
| Kaul, 1999            | Intravenous immunoglobulin therapy for streptococcal toxic shock syndrome--a comparative observational study. The Canadian Streptococcal Study Group | Duplicate                                                                     |
| Salinas, 2005         | Immunoglobulins in sepsis and septic shock                                                                                                           | Not in English                                                                |

|                        |                                                                                                                                                                            |                    |
|------------------------|----------------------------------------------------------------------------------------------------------------------------------------------------------------------------|--------------------|
| Shands, 1982           | Toxic shock syndrome: case-control studies at the Centers for Disease Control                                                                                              | Duplicate          |
| Sierra, 2006           | Group A streptococcal infections in injection drug users in Barcelona, Spain: epidemiologic, clinical, and microbiologic analysis of 3 clusters of cases from 2000 to 2003 | Duplicate          |
| Urbina, 2019           | Early identification of patients at high risk of group A streptococcus-associated necrotizing skin and soft tissue infections: A retrospective cohort study                | Duplicate          |
| Vallalta-Morales, 2005 | [Streptococcal toxic shock syndrome: ten years' experience at a tertiary hospital]                                                                                         | Not in English     |
| Vasant, 2019           | Mass prophylaxis in an outbreak of invasive group A streptococcal disease in a residential aged care facility                                                              | Duplicate          |
| Vugia, 1996            | Invasive group A streptococcal infections in children with varicella in Southern California                                                                                | Duplicate          |
| Zachariadou, 2014      | Differences in the epidemiology between paediatric and adult invasive <i>Streptococcus pyogenes</i> infections                                                             | Duplicate          |
| Bernard, 1995          | [Bacterial dermo-hypodermatitis in adults. Incidence and role of streptococcal etiology]                                                                                   | Not in English     |
| Bleton, 1991           | Necrotizing fasciitis of the upper limb. 12 cases                                                                                                                          | Not in English     |
| Bleton, 1991           | Necrotising fasciitis of the upper limb. Report of twelve cases                                                                                                            | Duplicate          |
| Fan, 2014              | [Clinical characteristics and antimicrobial resistance of invasive group A beta-hemolytic streptococcus infection in children]                                             | Not in English     |
| Fica, 2003             | Molecular epidemiology of a streptococcus pyogenes related nosocomial outbreak in a burn unit                                                                              | Not in English     |
| Fredlund, 1990         | [Increased frequency of group A hemolytic streptococci. Old age and immune deficiency among the risk factors]                                                              | Not in English     |
| Georgiev, 1993         | Puerperal streptococcal sepsis                                                                                                                                             | Not in English     |
| Khan, 2003             | Treatment of necrotizing fasciitis with quinolones                                                                                                                         | Wrong population   |
| Frosi, 1999            | Necrotizing fasciitis: A serious and uncommon alcohol related disease                                                                                                      | Wrong study design |
| Nedrebo, 2020          | Necrotizing Soft Tissue Infections: Case Reports, from the Clinician's Perspectives.                                                                                       | Wrong study design |
| Reicher, 2021          | 450 Obstetrically related group a streptococcal infection and predictors for severity - retrospective 12-year cohort study                                                 | Wrong study design |
| Bajpai, 2020           | Anti-microbial-resistance and profile of exotoxins of invasive beta-haemolytic-streptococci infections in trauma patients                                                  | Wrong population   |
| Adamkova, 2020         | Can gram-negative-like biomarker values in <i>Streptococcus pyogenes</i> sepsis negatively influence right choice of initial antibiotic therapy?                           | Wrong population   |
| Bandi, 2021            | Group A streptococcal infections in children                                                                                                                               | Wrong population   |
| Ceccato, 2020          | Use of corticosteroids in patients with severe CAP admitted to ICU, experience in a real-life setting                                                                      | Wrong population   |
| Tepper, 2021           | Long-term safety and tolerability of atogepant following once daily dosing over 1 year for the preventive treatment of migraine                                            | Wrong population   |

|                     |                                                                                                                                                                                                      |                                                                               |
|---------------------|------------------------------------------------------------------------------------------------------------------------------------------------------------------------------------------------------|-------------------------------------------------------------------------------|
| Melo, 2021          | Clinical, epidemiological and microbiological features of streptococcus pyogenes invasive infection - 10 year retrospective review                                                                   | Wrong population                                                              |
| Bringel, 2021       | Clinical characteristics and outcomes of children with toxic shock syndrome admitted to a pediatric intensive care unit: A case series                                                               | Wrong population                                                              |
| Neff, 2020          | Characterisation of clinical manifestations and treatment strategies for invasive beta-haemolytic streptococcal infections in a Swiss tertiary hospital.                                             | Wrong population                                                              |
| Urbina, 2020        | Assessing and applying individualized treatment for group A streptococcal necrotizing soft-tissue infection is possible                                                                              | Wrong population                                                              |
| Bergsten, 2020      | Correlation between immunoglobulin dose administered and plasma neutralization of streptococcal superantigens in patients with necrotizing soft tissue infections                                    | Wrong population                                                              |
| Boukthir, 2020      | A prospective survey of Streptococcus pyogenes infections in French Brittany from 2009 to 2017: Comprehensive dynamic of new emergent emm genotypes.                                                 | Wrong population                                                              |
| Escriva-Vidal, 2021 | Clinical Features and Outcomes of Streptococcus anginosus Group Infective Endocarditis: A Multicenter Matched Cohort Study.                                                                          | Wrong population                                                              |
| Babiker, 2021       | Effectiveness of adjunctive clindamycin in beta-lactam antibiotic-treated patients with invasive beta-haemolytic streptococcal infections in US hospitals: a retrospective multicentre cohort study. | Wrong population                                                              |
| Cui, 2021           | Necrotizing soft tissue infection: clinical characteristics, diagnosis, and management of 32 cases in Beijing.                                                                                       | Wrong population                                                              |
| Link-Gelles, 2020   | Characteristics of Intracranial Group A Streptococcal Infections in US Children, 1997-2014.                                                                                                          | Wrong population                                                              |
| Peetermans, 2020    | Use of Intravenous Immunoglobulins in Patients with Suspected Toxin-Mediated Shock Requiring Extracorporeal Membrane Oxygenation.                                                                    | Wrong population                                                              |
| Bruun, 2020         | Beta-Hemolytic Streptococci and Necrotizing Soft Tissue Infections.                                                                                                                                  | Wrong population                                                              |
| Lima-Setta, 2021    | Multisystem inflammatory syndrome in children (MIS-C) during SARS-CoV-2 pandemic in Brazil: a multicenter, prospective cohort study.                                                                 | Wrong population                                                              |
| Kohler, 2020        | Kininogen supports inflammation and bacterial spreading during Streptococcus Pyogenes Sepsis.                                                                                                        | Wrong population                                                              |
| Bruun, 2021         | Risk Factors and Predictors of Mortality in Streptococcal Necrotizing Soft-tissue Infections: A Multicenter Prospective Study.                                                                       | Wrong population                                                              |
| Bjorck, 2020        | Morbidity and mortality in critically ill patients with invasive group A streptococcus infection: an observational study.                                                                            | Wrong population                                                              |
| Contou, 2021        | Menstrual toxic shock syndrome: a French nationwide multicenter retrospective study.                                                                                                                 | Wrong population                                                              |
| Billon, 2020        | Association of characteristics of tampon use with menstrual toxic shock syndrome in France.                                                                                                          | Wrong population                                                              |
| Canetti, 2021       | Invasive Group A Streptococcus Infection in Children in Central Israel in 2012-2019                                                                                                                  | Relationship between prognostic factor and outcome not reported or quantified |

|    |                         |                                                                                                                                                                          |                                                                               |
|----|-------------------------|--------------------------------------------------------------------------------------------------------------------------------------------------------------------------|-------------------------------------------------------------------------------|
| 1  |                         |                                                                                                                                                                          |                                                                               |
| 2  |                         |                                                                                                                                                                          |                                                                               |
| 3  |                         |                                                                                                                                                                          |                                                                               |
| 4  |                         |                                                                                                                                                                          |                                                                               |
| 5  |                         |                                                                                                                                                                          |                                                                               |
| 6  | Vilhonen, 2020          | Group A streptococcal bacteremias in Southwest Finland 2007-2018: epidemiology and role of infectious diseases consultation in antibiotic treatment selection.           | Relationship between prognostic factor and outcome not reported or quantified |
| 7  |                         |                                                                                                                                                                          |                                                                               |
| 8  |                         |                                                                                                                                                                          |                                                                               |
| 9  | Thielemans, 2020        | Clinical Description and Outcomes of Australian Children With Invasive Group A Streptococcal Disease.                                                                    | Relationship between prognostic factor and outcome not reported or quantified |
| 10 |                         |                                                                                                                                                                          |                                                                               |
| 11 | Madsen, 2020            | Treatment of Necrotizing Soft Tissue Infections: IVIG                                                                                                                    | Wrong study design                                                            |
| 12 |                         |                                                                                                                                                                          |                                                                               |
| 13 |                         |                                                                                                                                                                          |                                                                               |
| 14 | Deniskin, 2019          | Clinical Manifestations and Bacterial Genomic Analysis of Group A Streptococcus Strains That Cause Pediatric Toxic Shock Syndrome.                                       | Relationship between prognostic factor and outcome not reported or quantified |
| 15 |                         |                                                                                                                                                                          |                                                                               |
| 16 |                         |                                                                                                                                                                          |                                                                               |
| 17 |                         |                                                                                                                                                                          |                                                                               |
| 18 | Mosites, 2018           | Outbreak of Invasive Infections From Subtype emm26.3 Group A Streptococcus Among Homeless Adults-Anchorage, Alaska, 2016-2017.                                           | Relationship between prognostic factor and outcome not reported or quantified |
| 19 |                         |                                                                                                                                                                          |                                                                               |
| 20 |                         |                                                                                                                                                                          |                                                                               |
| 21 | Hasin, 2020             | Invasive Group A Streptococcus Infection in Children in Southern Israel Before and After the Introduction of Varicella Vaccine.                                          | Wrong population                                                              |
| 22 |                         |                                                                                                                                                                          |                                                                               |
| 23 | Ching, 2019             | Prospective Surveillance of Pediatric Invasive Group A Streptococcus Infection.                                                                                          | Wrong population                                                              |
| 24 |                         |                                                                                                                                                                          |                                                                               |
| 25 |                         |                                                                                                                                                                          |                                                                               |
| 26 | Loewen, 2017            | Epidemiologic features of invasive group A Streptococcus infection in a rural hospital: 6-year retrospective report and literature review.                               | Wrong population                                                              |
| 27 |                         |                                                                                                                                                                          |                                                                               |
| 28 |                         |                                                                                                                                                                          |                                                                               |
| 29 | Bergsten, 2020          | Correlation Between Immunoglobulin Dose Administered and Plasma Neutralization of Streptococcal Superantigens in Patients With Necrotizing Soft Tissue Infections.       | Wrong population                                                              |
| 30 |                         |                                                                                                                                                                          |                                                                               |
| 31 | Kobayashi, 2016         | A Cluster of Group A Streptococcal Infections in a Skilled Nursing Facility-the Potential Role of Healthcare Worker Presenteeism.                                        | Wrong population                                                              |
| 32 |                         |                                                                                                                                                                          |                                                                               |
| 33 |                         |                                                                                                                                                                          |                                                                               |
| 34 | Adebanjo, 2020          | Evaluating Household Transmission of Invasive Group A Streptococcus Disease in the United States Using Population-based Surveillance Data, 2013-2016.                    | Wrong population                                                              |
| 35 |                         |                                                                                                                                                                          |                                                                               |
| 36 |                         |                                                                                                                                                                          |                                                                               |
| 37 | Link-Gelles, 2020       | Characteristics of Intracranial Group A Streptococcal Infections in US Children, 1997-2014.                                                                              | Wrong population                                                              |
| 38 |                         |                                                                                                                                                                          |                                                                               |
| 39 |                         |                                                                                                                                                                          |                                                                               |
| 40 | Bruun, 2021             | Risk Factors and Predictors of Mortality in Streptococcal Necrotizing Soft-tissue Infections: A Multicenter Prospective Study.                                           | Wrong population                                                              |
| 41 |                         |                                                                                                                                                                          |                                                                               |
| 42 |                         |                                                                                                                                                                          |                                                                               |
| 43 | Shah, 2015              | Role of intravenous immune globulin in streptococcal toxic shock syndrome and Clostridium difficile infection.                                                           | Wrong study design                                                            |
| 44 |                         |                                                                                                                                                                          |                                                                               |
| 45 | Hayata, 2021            | Nationwide study of mortality and survival in pregnancy-related streptococcal toxic shock syndrome.                                                                      | Duplicate                                                                     |
| 46 |                         |                                                                                                                                                                          |                                                                               |
| 47 | Fernandez-Galilea, 2022 | Clindamycin but not Intravenous Immunoglobulins reduces mortality in a retrospective cohort of critically ill patients with bacteremic Group A Streptococcal infections. | Wrong population                                                              |
| 48 |                         |                                                                                                                                                                          |                                                                               |
| 49 |                         |                                                                                                                                                                          |                                                                               |
| 50 | Heil, 2021              | Role of Clindamycin Versus Linezolid for Serious Group A Streptococcal Infections                                                                                        | Wrong population                                                              |
| 51 |                         |                                                                                                                                                                          |                                                                               |
| 52 |                         |                                                                                                                                                                          |                                                                               |
| 53 | Nanduri, 2022           | Challenges in Surveillance for Streptococcal Toxic Shock Syndrome: Active Bacterial Core Surveillance, United States, 2014-2017.                                         | Wrong study design                                                            |
| 54 |                         |                                                                                                                                                                          |                                                                               |
| 55 |                         |                                                                                                                                                                          |                                                                               |
| 56 |                         |                                                                                                                                                                          |                                                                               |
| 57 |                         |                                                                                                                                                                          |                                                                               |
| 58 |                         |                                                                                                                                                                          |                                                                               |
| 59 |                         |                                                                                                                                                                          |                                                                               |
| 60 |                         |                                                                                                                                                                          |                                                                               |



|                   |                                                                                                                                                                               |                                                                               |
|-------------------|-------------------------------------------------------------------------------------------------------------------------------------------------------------------------------|-------------------------------------------------------------------------------|
| Hamada, 2022      | Association between adjunct clindamycin and in-hospital mortality in patients with necrotizing soft tissue infection due to group A Streptococcus: a nationwide cohort study. | Wrong population                                                              |
| Fay, 2021         | Patterns of Antibiotic Nonsusceptibility Among Invasive Group A Streptococcus Infections, United States, 2006-2017.                                                           | Relationship between prognostic factor and outcome not reported or quantified |
| Horn, 2021        | Outcomes of $\alpha$ -Hemolytic Streptococcal Necrotizing Skin and Soft-tissue Infections and the Impact of Clindamycin Resistance.                                           | Relationship between prognostic factor and outcome not reported or quantified |
| Contou, 2022      | Menstrual Toxic Shock Syndrome: A French Nationwide Multicenter Retrospective Study.                                                                                          | Wrong population                                                              |
| Valenciano, 2021  | Invasive Group A Streptococcal Infections Among People Who Inject Drugs and People Experiencing Homelessness in the United States, 2010-2017.                                 | Relationship between prognostic factor and outcome not reported or quantified |
| Jutras, 2021      | Intravenous Immunoglobulin Use In Critically Ill Children.                                                                                                                    | Wrong population                                                              |
| Metcalf, 2022     | Cluster Transmission Drives Invasive Group A Streptococcus Disease Within the United States and Is Focused on Communities Experiencing Disadvantage.                          | Wrong population                                                              |
| Dunne, 2022       | Increasing Incidence of Invasive Group A Streptococcus Disease, Idaho, USA, 2008-2019.                                                                                        | Relationship between prognostic factor and outcome not reported or quantified |
| VanZeeland, 2022  | Public health response following an iGAS outbreak in a residential aged care facility in Queensland.                                                                          | Wrong population                                                              |
| Barisiene, 2021   | Lithuanian tertiary pediatric centre experience of multi-system inflammatory syndrome in children (MIS-C): clinical cases study                                               | Wrong population                                                              |
| Silvestre, 2022   | Toxic shock syndrome: diagnosis and management.                                                                                                                               | Wrong study design                                                            |
| Nabarro, 2022     | Invasive Group A Streptococcus Outbreaks Associated with Home Healthcare, England, 2018-2019.                                                                                 | Wrong population                                                              |
| Nagata, 2022      | Necrotizing fasciitis of the extremities in high and low Charlson Comorbidity Index: A multi-center retrospective cohort study.                                               | Wrong population                                                              |
| deNeergaard, 2022 | Invasive streptococcal infection can lead to the generation of cross-strain opsonic antibodies                                                                                | Wrong population                                                              |
| Pershing, 2021    | Pediatric Group A Streptococcal Peritonitis: A Single-Center Eleven Patient Case Series                                                                                       | Wrong population                                                              |
| Nawijn, 2021      | Incidence and mortality of necrotizing fasciitis in The Netherlands: the impact of group A Streptococcus.                                                                     | Wrong population                                                              |
| Sahin, 2022       | Clinical and Laboratory Features of Invasive Group A Streptococcal Infections: 8 Years Experience.                                                                            | Wrong population                                                              |
| Thean, 2020       | The epidemiology and clinical course of invasive staphylococcus aureus and group a streptococcus infections in Fiji: A prospective study                                      | Wrong population                                                              |

1  
2  
3  
4  
5  
6  
7  
8  
9  
10  
11  
12  
13  
14  
15  
16  
17  
18  
19  
20  
21  
22  
23  
24  
25  
26  
27  
28  
29  
30  
31  
32  
33  
34  
35  
36  
37  
38  
39  
40  
41  
42  
43  
44  
45  
46  
47  
48  
49  
50  
51  
52  
53  
54  
55  
56  
57  
58  
59  
60

|              |                                                                                                    |           |
|--------------|----------------------------------------------------------------------------------------------------|-----------|
| Hayata, 2021 | Nationwide study of mortality and survival in pregnancy-related streptococcal toxic shock syndrome | Duplicate |
|--------------|----------------------------------------------------------------------------------------------------|-----------|

For peer review only

**Table of additional study characteristics**

| Study                   | Study Design | Country                 | Number of STSS cases | Mean age   | % Male | Cardiovascular Disease (%) | Diabetes (%) | Presence of Necrotizing Fasciitis (%) | Probable GAS STSS (%) | Confirmed GAS STSS (%) | Prognostic factor and outcome combination of interest reported                                                                                                                                                                                                                                                                                                                                                                                                    |
|-------------------------|--------------|-------------------------|----------------------|------------|--------|----------------------------|--------------|---------------------------------------|-----------------------|------------------------|-------------------------------------------------------------------------------------------------------------------------------------------------------------------------------------------------------------------------------------------------------------------------------------------------------------------------------------------------------------------------------------------------------------------------------------------------------------------|
| Abuhammour 2004         | Cohort       | United States           | 2                    | 9          | 100    | NR                         | NR           | NR                                    | NR                    | NR                     | age - clinical cure/improvement^<br>age - ICU admission^<br>age - mortality^<br>any antibiotic - clinical cure/improvement^<br>any antibiotic - ICU admission<br>any antibiotic - mortality                                                                                                                                                                                                                                                                       |
| Adalat 2014             | Cohort       | United Kingdom, Ireland | 29                   | 4 (median) | 62     | NR                         | NR           | 28                                    | 38                    | 62                     | IVIG - mortality                                                                                                                                                                                                                                                                                                                                                                                                                                                  |
| Al-Ajmi 2012            | Case-series  | Qatar                   | 2                    | 35         | 0      | NR                         | NR           | NR                                    | 0                     | 100                    | age - clinical cure/improvement^<br>age - ICU admission^<br>age - mortality^                                                                                                                                                                                                                                                                                                                                                                                      |
| Barnham 2002            | Case-series  | England                 | 12                   | 57         | 64     | NR                         | NR           | 58                                    | 17                    | 83                     | age - ICU admission^<br>age - mortality^<br>any antibiotic - ICU admission<br>any antibiotic - mortality<br>clindamycin - ICU admission^<br>clindamycin - mortality<br>emm type - ICU admission^<br>emm type - mortality^<br>immunocompromised - ICU admission^<br>immunocompromised - mortality<br>IVIG - ICU admission<br>IVIG - mortality<br>IVIG - time to mortality^<br>NF - ICU admission<br>NF - mortality<br>NSAIDs - ICU admission<br>NSAIDs - mortality |
| Bernaldo de Quiros 1997 | Cohort       | Spain                   | 9                    | NR         | NR     | NR                         | NR           | NR                                    | NR                    | NR                     | immunocompromised - mortality^                                                                                                                                                                                                                                                                                                                                                                                                                                    |

1  
2  
3  
4  
5  
6  
7  
8  
9  
10  
11  
12  
13  
14  
15  
16  
17  
18  
19  
20  
21  
22  
23  
24  
25  
26  
27  
28  
29  
30  
31  
32  
33  
34  
35  
36  
37  
38  
39  
40  
41  
42  
43  
44  
45  
46  
47

| Study                   | Study Design | Country       | Number of STSS cases | Mean age | % Male | Cardiovascular Disease (%) | Diabetes (%) | Presence of Necrotizing Fasciitis (%) | Probable GAS STSS (%) | Confirmed GAS STSS (%) | Prognostic factor and outcome combination of interest reported                                                                                                                                                                                                                                                                                                                                                                                                                                                                                                                                                                                                                                                           |
|-------------------------|--------------|---------------|----------------------|----------|--------|----------------------------|--------------|---------------------------------------|-----------------------|------------------------|--------------------------------------------------------------------------------------------------------------------------------------------------------------------------------------------------------------------------------------------------------------------------------------------------------------------------------------------------------------------------------------------------------------------------------------------------------------------------------------------------------------------------------------------------------------------------------------------------------------------------------------------------------------------------------------------------------------------------|
| Brogan 1995             | Case-series  | United States | 5                    | 6        | 60     | NR                         | NR           | 100                                   | 60                    | 40                     | age - clinical cure/improvement^<br>age - hospital LOS^<br>age - ICU admission^<br>age - ICU LOS^<br>age - mortality^<br>NSAIDs - clinical cure/improvement^<br>NSAIDs - hospital LOS^<br>NSAIDs - ICU admission<br>NSAIDs - ICU LOS^<br>NSAIDs - mortality<br>sex - clinical cure/improvement<br>sex - hospital LOS^<br>sex - ICU admission<br>sex - ICU LOS^<br>sex - mortality                                                                                                                                                                                                                                                                                                                                        |
| Butragueno Laiseca 2017 | Case-series  | Spain         | 13                   | 2        | 50     | NR                         | NR           | 15                                    | 15                    | 85                     | acute renal failure - clinical cure/improvement^<br>acute renal failure - mechanical ventilation<br>acute renal failure - mortality<br>age - clinical cure/improvement^<br>age - ICU LOS^<br>age - mechanical ventilation^<br>age - mortality^<br>clindamycin - clinical cure/improvement^<br>clindamycin - ICU LOS^<br>clindamycin - mechanical ventilation^<br>clindamycin - mortality<br>hemodialysis - clinical cure/improvement<br>hemodialysis - mechanical ventilation<br>hemodialysis - mortality<br>IVIg - clinical cure/improvement<br>IVIg - ICU LOS<br>IVIg - mechanical ventilation<br>IVIg - mortality<br>NF - clinical cure/improvement<br>NF - ICU LOS^<br>NF - mechanical ventilation<br>NF - mortality |
| Carapetis 1995          | Case-series  | Australia     | 5                    | NR       | NR     | NR                         | NR           | NR                                    | NR                    | NR                     | age - mortality^                                                                                                                                                                                                                                                                                                                                                                                                                                                                                                                                                                                                                                                                                                         |

| Study          | Study Design     | Country                              | Number of STSS cases | Mean age | % Male | Cardiovascular Disease (%) | Diabetes (%) | Presence of Necrotizing Fasciitis (%) | Probable GAS STSS (%) | Confirmed GAS STSS (%) | Prognostic factor and outcome combination of interest reported                                                                                                                                                                                                 |
|----------------|------------------|--------------------------------------|----------------------|----------|--------|----------------------------|--------------|---------------------------------------|-----------------------|------------------------|----------------------------------------------------------------------------------------------------------------------------------------------------------------------------------------------------------------------------------------------------------------|
| Carapetis 2014 | Cohort           | Australia                            | 37                   | 60       | 50     | NR                         | NR           | 100                                   | 0                     | 100                    | age - mortality^<br>IVIG - mortality<br>sex - mortality                                                                                                                                                                                                        |
| Cimolai 1992   | Case-series      | Canada                               | 4                    | 8        | 50     | NR                         | NR           | NR                                    | 0                     | 100                    | age - clinical cure/improvement^<br>age - mortality^<br>sex - clinical cure/improvement<br>sex - mortality                                                                                                                                                     |
| Cook 2020      | Cohort           | United States                        | 27                   | 9        | 44     | NR                         | NR           | 19                                    | 56                    | 44                     | other - other^                                                                                                                                                                                                                                                 |
| Cowan 1994     | Case-series      | United States                        | 3                    | 2        | 67     | NR                         | NR           | NR                                    | 100                   | 0                      | age - clinical cure/improvement^<br>age - ICU admission^<br>age - ICU LOS^<br>age - mechanical ventilation^<br>age - mortality^<br>sex - clinical cure/improvement<br>sex - ICU admission<br>sex - ICU LOS^<br>sex - mechanical ventilation<br>sex - mortality |
| Crum 2004      | Case-series      | United States                        | 2                    | 24       | 100    | NR                         | NR           | 50                                    | 0                     | 100                    | age - clinical cure/improvement^<br>age - ICU admission^<br>age - mechanical ventilation^<br>age - mortality^<br>hemodialysis - clinical cure/improvement<br>hemodialysis - ICU admission<br>hemodialysis - mechanical ventilation<br>hemodialysis - mortality |
| Dahl 2002      | Case-series      | United States                        | 5                    | 53       | NR     | NR                         | NR           | 100                                   | 0                     | 100                    | age - mortality^<br>immunocompromised - mortality                                                                                                                                                                                                              |
| Darenberg 2003 | Randomized trial | Sweden, Norway, Finland, Netherlands | 18                   | 52       | 48     | NR                         | NR           | NR                                    | 11                    | 89                     | IVIG - change in SOFA score^<br>IVIG - mortality<br>IVIG - time to clinical cure/improvement^<br>IVIG - time to mortality^                                                                                                                                     |

1  
2  
3  
4  
5  
6  
7  
8  
9  
10  
11  
12  
13  
14  
15  
16  
17  
18  
19  
20  
21  
22  
23  
24  
25  
26  
27  
28  
29  
30  
31  
32  
33  
34  
35  
36  
37  
38  
39  
40  
41  
42  
43  
44  
45  
46  
47

| Study          | Study Design | Country       | Number of STSS cases | Mean age       | % Male | Cardiovascular Disease (%) | Diabetes (%) | Presence of Necrotizing Fasciitis (%) | Probable GAS STSS (%) | Confirmed GAS STSS (%) | Prognostic factor and outcome combination of interest reported                                                                                                                                                                                                                                                                                                                     |
|----------------|--------------|---------------|----------------------|----------------|--------|----------------------------|--------------|---------------------------------------|-----------------------|------------------------|------------------------------------------------------------------------------------------------------------------------------------------------------------------------------------------------------------------------------------------------------------------------------------------------------------------------------------------------------------------------------------|
| Donaldson 1993 | Case-series  | England       | 5                    | 67             | 20     | NR                         | NR           | 100                                   | NR                    | NR                     | age - mortality^<br>any antibiotic - mortality<br>sex - mortality                                                                                                                                                                                                                                                                                                                  |
| Erdem 2004     | Case-series  | United States | 3                    | 52             | 67     | NR                         | NR           | 100                                   | NR                    | 33                     | age - mortality^<br>sex - mortality                                                                                                                                                                                                                                                                                                                                                |
| Eriksson 1999  | Cohort       | Sweden        | 6                    | 46             | 83     | NR                         | NR           | NR                                    | 0                     | 100                    | age - mortality^<br>emm type - mortality^<br>sex - mortality                                                                                                                                                                                                                                                                                                                       |
| Forni 1995     | Case-series  | United States | 5                    | 54             | 83     | NR                         | 17           | 50                                    | 0                     | 100                    | acure renal failure - ICU admission^<br>acute renal failure - mortality<br>age - hospital LOS^<br>age - ICU admission^<br>age - mortality^<br>emm type - ICU admission^<br>emm type - mortality^<br>NF - ICU admission<br>NF - mortality                                                                                                                                           |
| Fronhoffs 2000 | Case-series  | Germany       | 7                    | 49             | 71     | 14                         | 14           | 86                                    | 86                    | 14                     | acute renal failure - mechanical ventilation<br>acute renal failure - mortality<br>age - mechanical ventilation^<br>age - mortality^<br>immunocompromised - mechanical ventilation^<br>immunocompromised - mortality<br>NF - mechanical ventilation<br>NF - mortality<br>NSAIDs - mechanical ventilation^<br>NSAIDs - mortality<br>sex - mechanical ventilation<br>sex - mortality |
| Hasegawa 2004  | Case-control | Japan         | 66*                  | Range: 0 to 70 | 59     | NR                         | 18           | NR                                    | 100                   | 0                      | acute renal failure - mortality                                                                                                                                                                                                                                                                                                                                                    |
| Hayata 2021    | Cohort       | Japan         | 28                   | NR             | 0      | NR                         | NR           | NR                                    | 0                     | 100                    | age - mortality^<br>NSAIDs - mortality                                                                                                                                                                                                                                                                                                                                             |

| Study            | Study Design | Country                                                                                                   | Number of STSS cases | Mean age | % Male | Cardiovascular Disease (%) | Diabetes (%) | Presence of Necrotizing Fasciitis (%) | Probable GAS STSS (%) | Confirmed GAS STSS (%) | Prognostic factor and outcome combination of interest reported                                                                     |
|------------------|--------------|-----------------------------------------------------------------------------------------------------------|----------------------|----------|--------|----------------------------|--------------|---------------------------------------|-----------------------|------------------------|------------------------------------------------------------------------------------------------------------------------------------|
| Huang 2001       | Case-series  | Taiwan                                                                                                    | 3                    | 6        | 100    | NR                         | NR           | NR                                    | 33                    | 67                     | age - mortality^                                                                                                                   |
| Kansal 2000      | Cohort       | Canada                                                                                                    | 28                   | NR       | NR     | NR                         | NR           | NR                                    | NR                    | NR                     | NF - other^                                                                                                                        |
| Kaul 1999        | Case-control | Canada                                                                                                    | 53                   | 57       | 55     | NR                         | NR           | NR                                    | NR                    | NR                     | dindamycin - mortality<br>IVIG - duration of mechanical ventilation^<br>IVIG - hospital LOS<br>IVIG - mortality<br>NF - mortality  |
| Linder 2017      | Cohort       | United States                                                                                             | 10                   | NR       | NR     | NR                         | NR           | NR                                    | 0                     | 100                    | immunocompromised - mortality                                                                                                      |
| Linnér 2014      | Cohort       | Sweden                                                                                                    | 67                   | 63       | 42     | 48                         | 16           | 28                                    | NR                    | NR                     | age - mortality^<br>dindamycin - mortality<br>IVIG - hospital LOS<br>IVIG - mortality                                              |
| Luca-Harari 2009 | Cohort       | Cyprus, Czech Republic, Denmark, Finland, France, Germany, Greece, Italy, Romania, Sweden, United Kingdom | 476                  | NR       | NR     | NR                         | NR           | NR                                    | NR                    | NR                     | emm type - mortality^                                                                                                              |
| Nelson 2016      | Cohort       | United States                                                                                             | 381                  | NR       | NR     | NR                         | NR           | 19                                    | NR                    | NR                     | age - mortality<br>NF - mortality                                                                                                  |
| O'Loughlin 2007  | Cohort       | United States                                                                                             | 309                  | NR       | NR     | NR                         | NR           | 20                                    | NR                    | NR                     | age - mortality<br>NF - mortality                                                                                                  |
| Page 2011        | Cohort       | Canada                                                                                                    | 16                   | NR       | NR     | NR                         | NR           | NR                                    | NR                    | NR                     | other - other^                                                                                                                     |
| Safar 2011       | Cohort       | New Zealand                                                                                               | 30                   | NR       | NR     | NR                         | NR           | 17                                    | 0                     | 100                    | age - mortality<br>NF - mortality                                                                                                  |
| Schwartz 1992    | Case-series  | United States                                                                                             | 8                    | 40       | 40     | NR                         | NR           | NR                                    | 0                     | 100                    | age - mortality^<br>emm type - mortality^<br>sex - mortality                                                                       |
| Shah 2009        | Cohort       | United States                                                                                             | 192                  | 8        | 49     | NR                         | NR           | NR                                    | NR                    | NR                     | IVIG - cost^<br>IVIG - hospital LOS<br>IVIG - ICU admission<br>IVIG - ICU LOS<br>IVIG - mechanical ventilation<br>IVIG - mortality |

1  
2  
3  
4  
5  
6  
7  
8  
9  
10  
11  
12  
13  
14  
15  
16  
17  
18  
19  
20  
21  
22  
23  
24  
25  
26  
27  
28  
29  
30  
31  
32  
33  
34  
35  
36  
37  
38  
39  
40  
41  
42  
43  
44  
45  
46  
47

| Study            | Study Design | Country       | Number of STSS cases | Mean age    | % Male | Cardiovascular Disease (%) | Diabetes (%) | Presence of Necrotizing Fasciitis (%) | Probable GAS STSS (%) | Confirmed GAS STSS (%) | Prognostic factor and outcome combination of interest reported                                                                                                                                                                                                                                                                                                                                                                                                                                                                                                                                        |
|------------------|--------------|---------------|----------------------|-------------|--------|----------------------------|--------------|---------------------------------------|-----------------------|------------------------|-------------------------------------------------------------------------------------------------------------------------------------------------------------------------------------------------------------------------------------------------------------------------------------------------------------------------------------------------------------------------------------------------------------------------------------------------------------------------------------------------------------------------------------------------------------------------------------------------------|
| Sriskandan 2000  | Cohort       | England       | 7                    | NR          | NR     | NR                         | NR           | NR                                    | NR                    | NR                     | other - other^                                                                                                                                                                                                                                                                                                                                                                                                                                                                                                                                                                                        |
| Stegmayr 1992    | Case-series  | Sweden        | 11                   | 42          | 64     | NR                         | NR           | NR                                    | 27                    | 73                     | age - clinical cure/improvement^<br>age - ICU admission^<br>age - mechanical ventilation^<br>age - mortality^<br>hemodialysis - clinical cure/improvement<br>hemodialysis - ICU admission<br>hemodialysis - mechanical ventilation<br>hemodialysis - mortality<br>IVIG - clinical cure/improvement<br>IVIG - ICU admission<br>IVIG - mechanical ventilation<br>IVIG - mortality<br>NF - clinical cure/improvement<br>NF - ICU admission<br>NF - mechanical ventilation<br>NF - mortality<br>sex - clinical cure/improvement<br>sex - ICU admission<br>sex - mechanical ventilation<br>sex - mortality |
| Stevens 1989     | Case-series  | United States | 19                   | 41          | 53     | 80                         | 5            | 21                                    | 0                     | 100                    | age - mortality^<br>emm type - mortality^<br>hemodialysis - mortality<br>NF - mortality<br>sex - mortality                                                                                                                                                                                                                                                                                                                                                                                                                                                                                            |
| Stockmann 2012   | Cohort       | United States | 53                   | 30 (median) | NR     | 58                         | 19           | 32                                    | NR                    | NR                     | age - ICU admission^<br>age - mortality                                                                                                                                                                                                                                                                                                                                                                                                                                                                                                                                                               |
| Tagini 2017      | Case-series  | Switzerland   | 5                    | 18          | 60     | NR                         | NR           | NR                                    | 20                    | 80                     | age - mortality^<br>emm type - mortality^<br>sex - mortality                                                                                                                                                                                                                                                                                                                                                                                                                                                                                                                                          |
| Torimitsu 2021   | Case-series  | Japan         | 4                    | NR          | 75     | NR                         | 50           | 25                                    | 0                     | 100                    | sex - mortality                                                                                                                                                                                                                                                                                                                                                                                                                                                                                                                                                                                       |
| Zachariadou 2013 | Cohort       | Greece        | 19                   | NR          | NR     | NR                         | NR           | NR                                    | 0                     | 100                    | age - mortality<br>emm type - mortality^                                                                                                                                                                                                                                                                                                                                                                                                                                                                                                                                                              |



1  
2  
3  
4  
5 \*More than 80% of STSS cases due to group A *Streptococcus*

6 ^Excluded from meta-analysis

7 NF=necrotizing fasciitis

8 NSAIDs=non-steroidal anti-inflammatory drugs

9 ICU=intensive care unit

10 IVIG=intravenous immunoglobulin

11 GAS=group A *Streptococcus*

12 STSS=streptococcal toxic shock syndrome

13 NR=not reported  
14  
15  
16  
17  
18  
19  
20  
21  
22  
23  
24  
25  
26  
27  
28  
29  
30  
31  
32  
33  
34  
35  
36  
37  
38  
39  
40  
41  
42  
43  
44  
45  
46  
47

For peer review only

### Risk of bias assessment of included studies

| Author                  | Study participation | Study Attrition | Prognostic Factor Measurement | Outcome Measurement | Study Confounding | Statistical Analysis and Presentation Summary | Overall Risk of Bias |
|-------------------------|---------------------|-----------------|-------------------------------|---------------------|-------------------|-----------------------------------------------|----------------------|
| Abuhammour 2004         | Low                 | Low             | Low                           | Low                 | High              | High                                          | High                 |
| Adalat 2014             | Low                 | High            | High                          | Low                 | High              | High                                          | High                 |
| Al-Ajmi 2012            | NA                  | NA              | NA                            | NA                  | NA                | NA                                            | High                 |
| Barnham 2002            | NA                  | NA              | NA                            | NA                  | NA                | NA                                            | High                 |
| Bernaldo de Quiros 1997 | Low                 | Low             | Low                           | Low                 | High              | High                                          | High                 |
| Brogan 1995             | NA                  | NA              | NA                            | NA                  | NA                | NA                                            | High                 |
| Butragueno Laiseca 2017 | NA                  | NA              | NA                            | NA                  | NA                | NA                                            | High                 |
| Carapetis 1995          | NA                  | NA              | NA                            | NA                  | NA                | NA                                            | High                 |
| Carapetis 2014          | Low                 | Low             | Low                           | Low                 | High              | High                                          | High                 |
| Cimolai 1992            | NA                  | NA              | NA                            | NA                  | NA                | NA                                            | High                 |
| Cook 2021               | Low                 | Low             | Low                           | Low                 | High              | High                                          | High                 |
| Cowan 1994              | NA                  | NA              | NA                            | NA                  | NA                | NA                                            | High                 |
| Crum 2004               | NA                  | NA              | NA                            | NA                  | NA                | NA                                            | High                 |
| Dahl 2002               | NA                  | NA              | NA                            | NA                  | NA                | NA                                            | High                 |
| Darenberg 2003          | Low                 | Moderate        | Low                           | Moderate            | Low               | Low                                           | Moderate             |
| Donaldson 1993          | NA                  | NA              | NA                            | NA                  | NA                | NA                                            | High                 |
| Erdem 2004              | NA                  | NA              | NA                            | NA                  | NA                | NA                                            | High                 |
| Eriksson 1999           | Low                 | Low             | Low                           | Low                 | High              | High                                          | High                 |
| Forni 1995              | NA                  | NA              | NA                            | NA                  | NA                | NA                                            | High                 |
| Fronhoffs 2000          | NA                  | NA              | NA                            | NA                  | NA                | NA                                            | High                 |
| Hasegawa 2004           | Low                 | Low             | Moderate                      | Low                 | High              | High                                          | High                 |
| Hayata 2021             | Low                 | Low             | Low                           | Low                 | High              | High                                          | High                 |
| Huang 2001              | NA                  | NA              | NA                            | NA                  | NA                | NA                                            | High                 |
| Kansal 2000             | Moderate            | Low             | Moderate                      | Low                 | High              | High                                          | High                 |
| Kaul 1999               | Low                 | Low             | Low                           | Low                 | High              | High                                          | High                 |

|                  |          |          |      |          |          |          |          |
|------------------|----------|----------|------|----------|----------|----------|----------|
| Linder 2017      | Low      | Moderate | Low  | Moderate | High     | High     | High     |
| Linner 2014      | Low      | Low      | Low  | Low      | Moderate | Low      | Low      |
| Luca-Harari 2009 | Low      | High     | Low  | Low      | High     | High     | High     |
| Nelson 2016      | Low      | Low      | Low  | Low      | High     | High     | High     |
| O'Loughlin 2007  | Low      | Low      | Low  | Low      | High     | High     | High     |
| Page 2011        | Low      | Low      | Low  | Low      | Moderate | High     | Moderate |
| Safar 2011       | Low      | Low      | Low  | Low      | High     | High     | High     |
| Schwartz 1992    | NA       | NA       | NA   | NA       | NA       | NA       | High     |
| Shah 2009        | Low      | High     | Low  | Low      | Moderate | Moderate | Moderate |
| Sriskandan 2000  | Moderate | Moderate | High | Low      | High     | High     | High     |
| Stegmayr 1992    | NA       | NA       | NA   | NA       | NA       | NA       | High     |
| Stevens 1989     | NA       | NA       | NA   | NA       | NA       | NA       | High     |
| Stockmann 2012   | Low      | Low      | Low  | Low      | High     | High     | High     |
| Tagini 2017      | NA       | NA       | NA   | NA       | NA       | NA       | High     |
| Torimitsu 2021   | NA       | NA       | NA   | NA       | NA       | NA       | High     |
| Zachariadou 2013 | Low      | Low      | Low  | Low      | High     | High     | High     |

NA, Not Applicable because case-series study design and rated at high risk of bias.

## Forest plots

$n_e$ : number of patients with the outcome exposed to or experiencing the prognostic factor (experimental group)

$N_e$ : total number of patients exposed to or experiencing the prognostic factor (experimental group)

$n_c$ : number of patients with the outcome not exposed to or experiencing the prognostic factor (control group)

$N_c$ : total number of patients not exposed to or experiencing the prognostic factor (control group)

Percentages in forest plots correspond to the percent weight contribution of each study in the meta-analysis.

For mortality, ICU admission and need for mechanical ventilation outcomes, an odds ratio greater than 1 corresponds with a worse STSS prognosis and an odds ratio less than 1 corresponds with a better STSS prognosis.

For clinical cure or improvement outcome, an odds ratio greater than 1 corresponds with a better STSS prognosis and an odds ratio less than 1 corresponds with a worse STSS prognosis.

For duration of hospitalization and ICU stay outcomes, a mean difference greater than 1 corresponds with a worse STSS prognosis and a mean difference less than 1 corresponds with a better STSS prognosis.

### Mortality

#### 1. Sex: male vs female (reference)

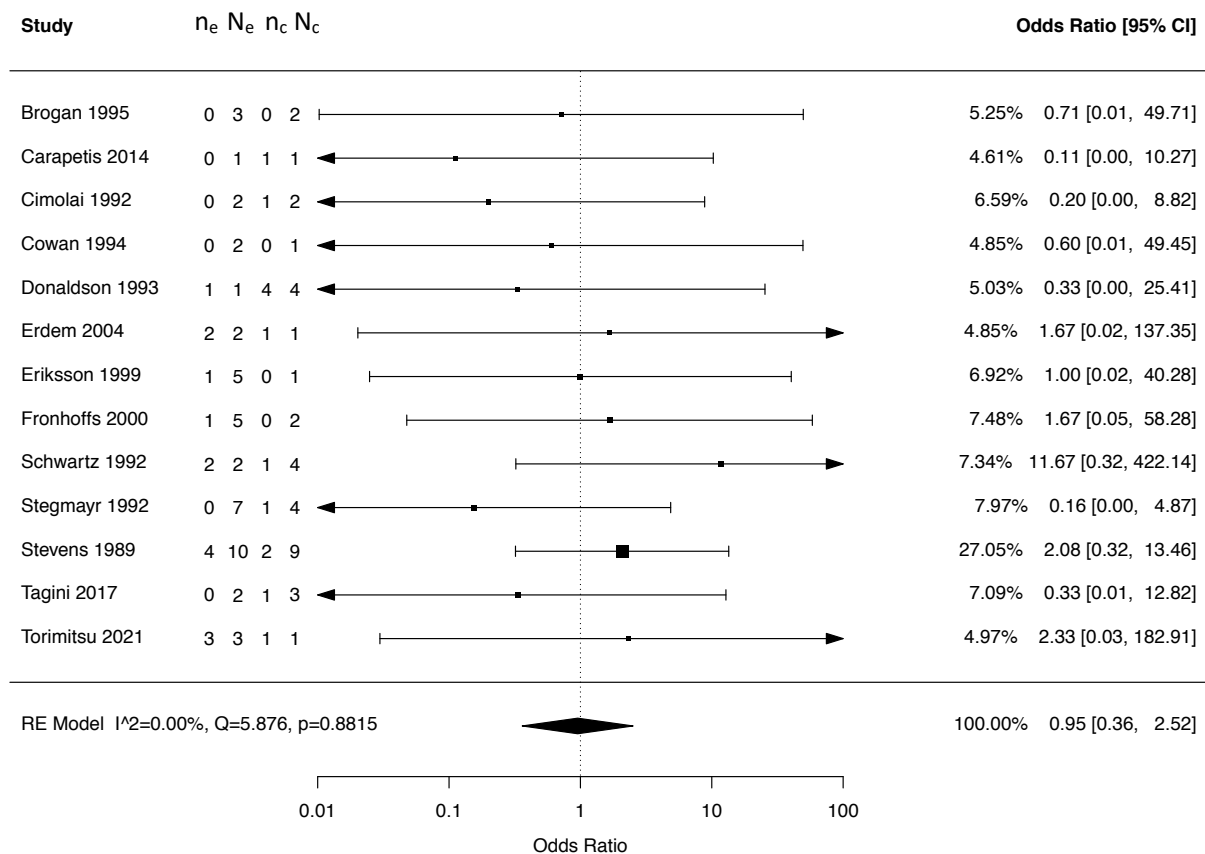

2.A) IVIG in all STSS patients: yes vs no (reference)

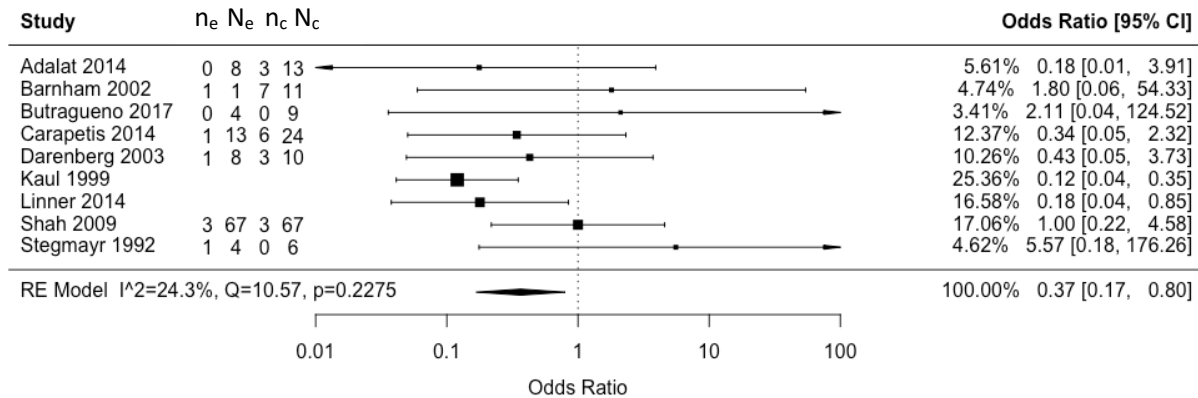

2.B) IVIG in the subset of STSS patients treated with clindamycin: yes vs no (reference)

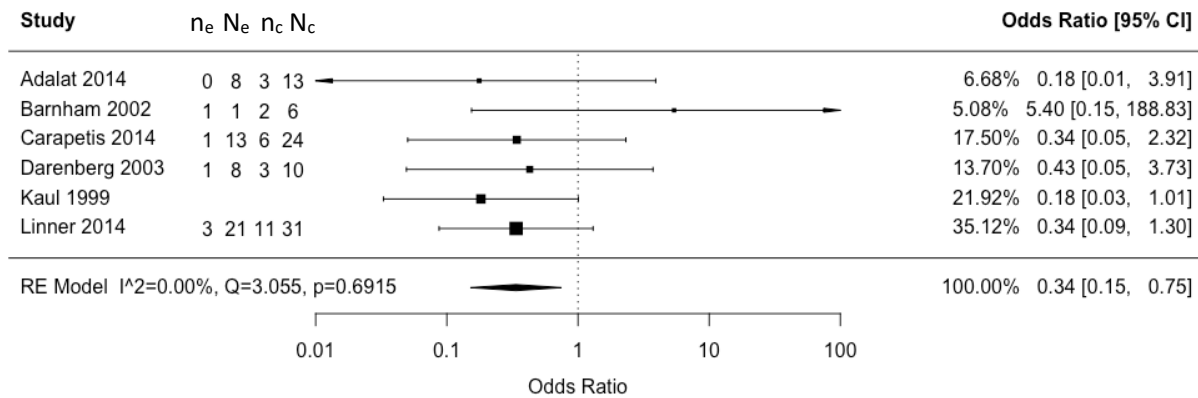

Only

3. Any antibiotic: yes vs no (reference)

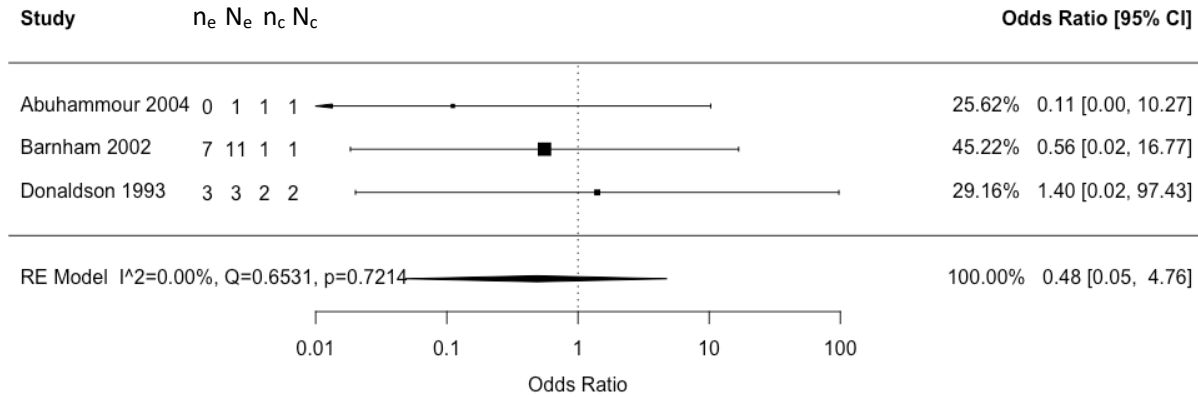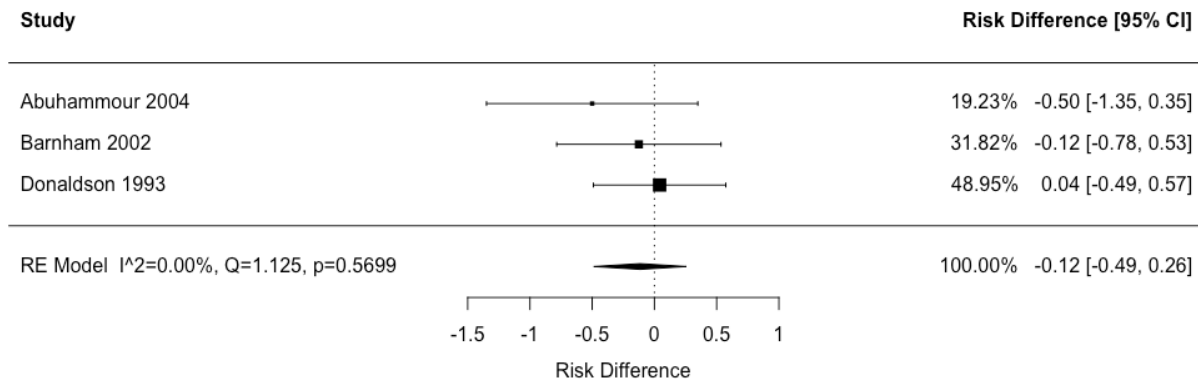

4. Necrotizing fasciitis: yes vs no (reference)

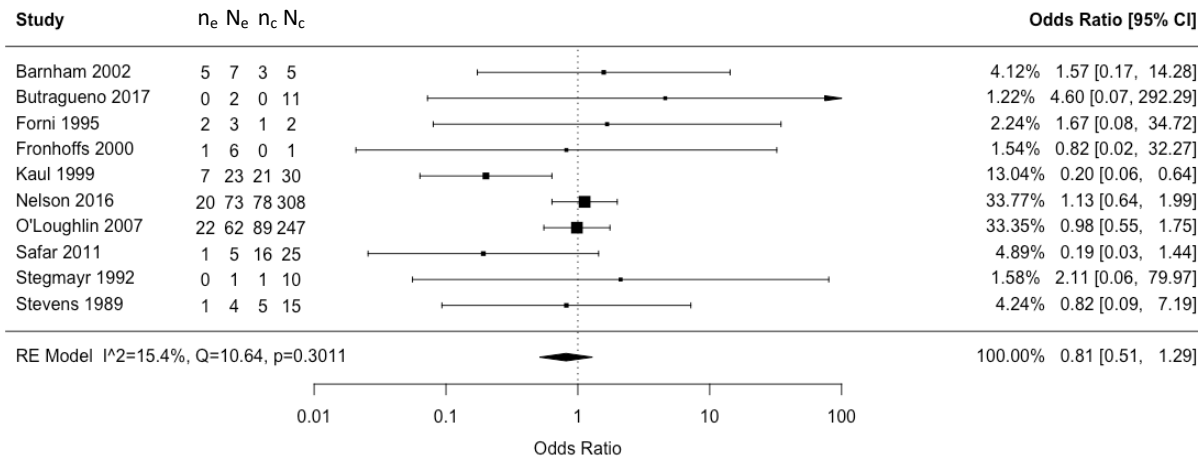

5. NSAIDs: yes vs no (reference)

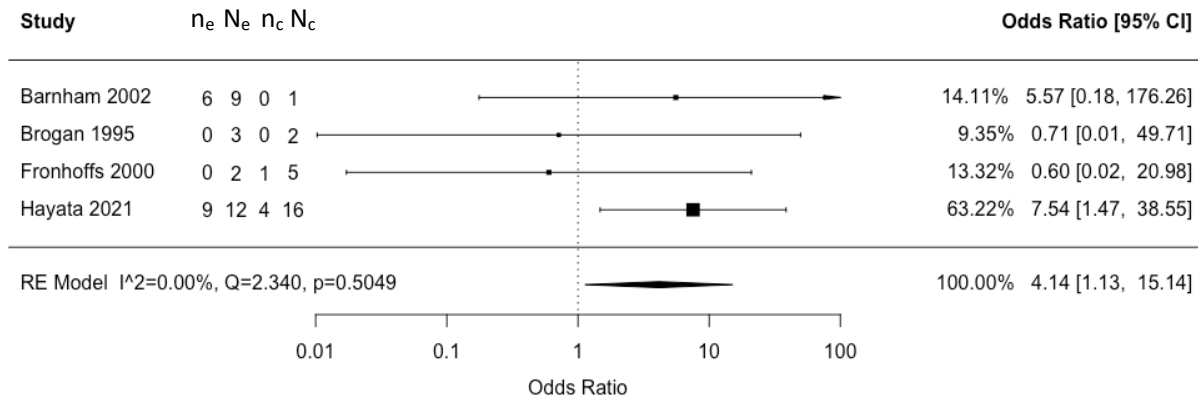

6. Immunocompromised: yes vs no (reference)

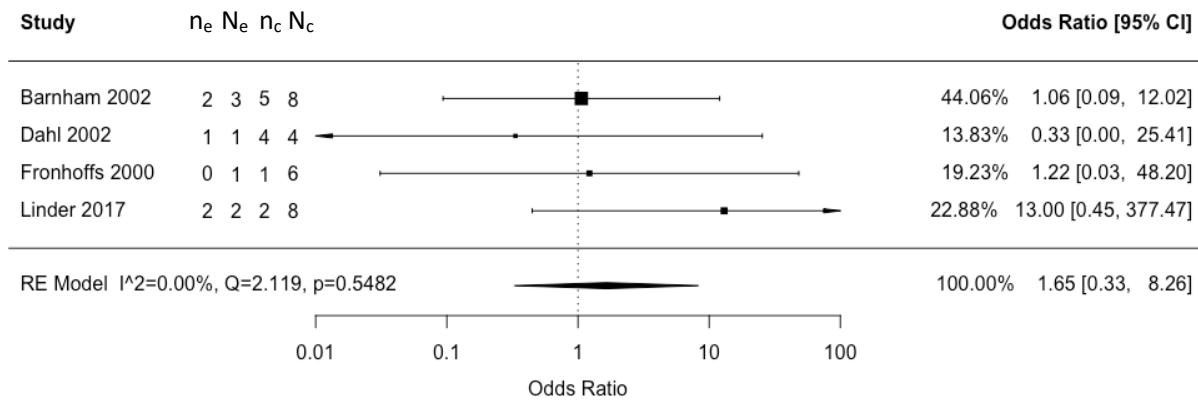

7. Age: <18 years vs 18-64 years (reference)

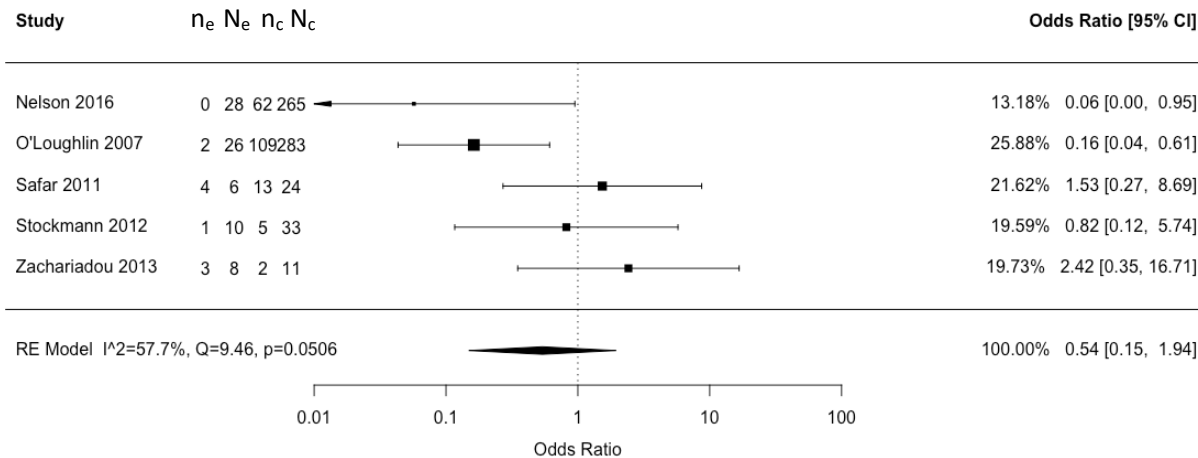

8. Age:  $\geq 65$  years vs  $< 18$  years (reference)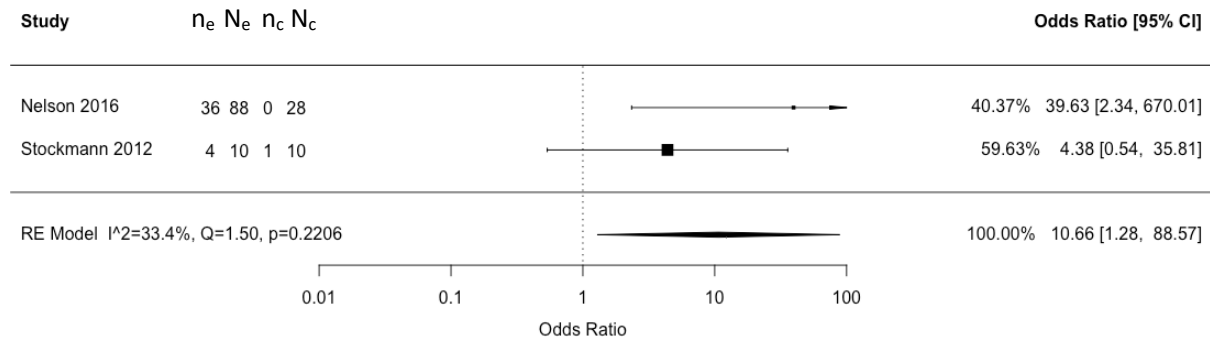9: Age:  $\geq 65$  years vs 18-64 years (reference)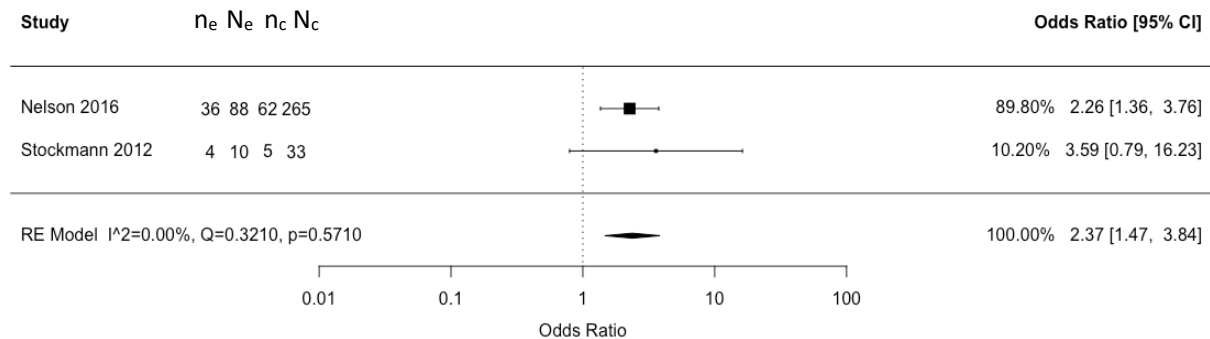

## 10. Clindamycin antibiotic vs no clindamycin antibiotic (reference)

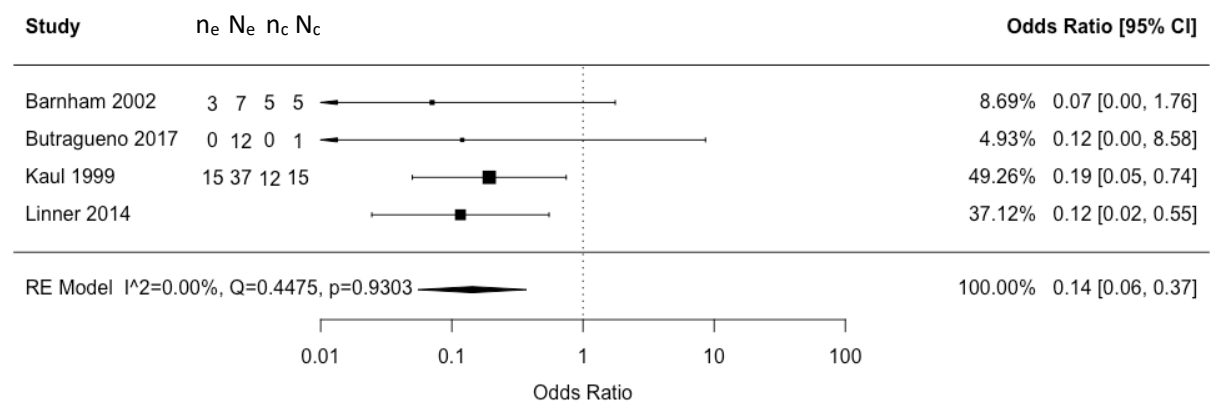



11. Acute renal failure: yes vs no (reference)

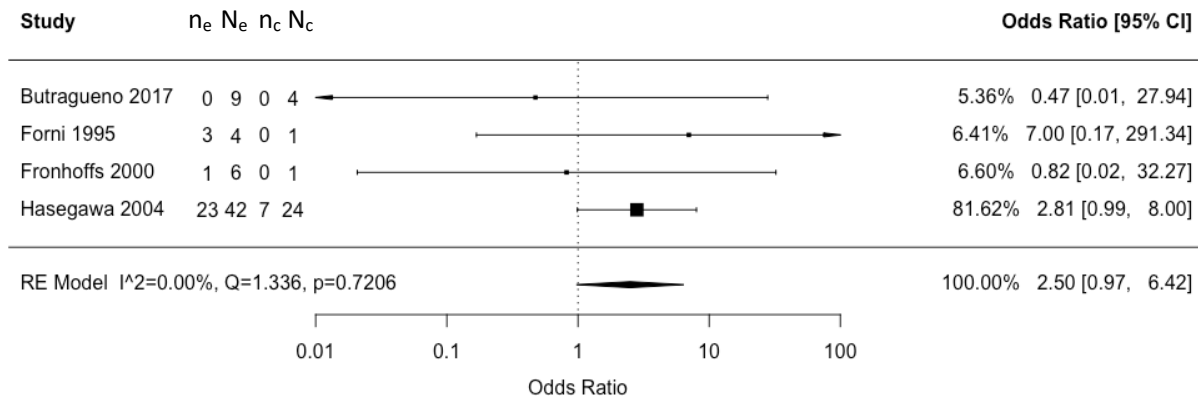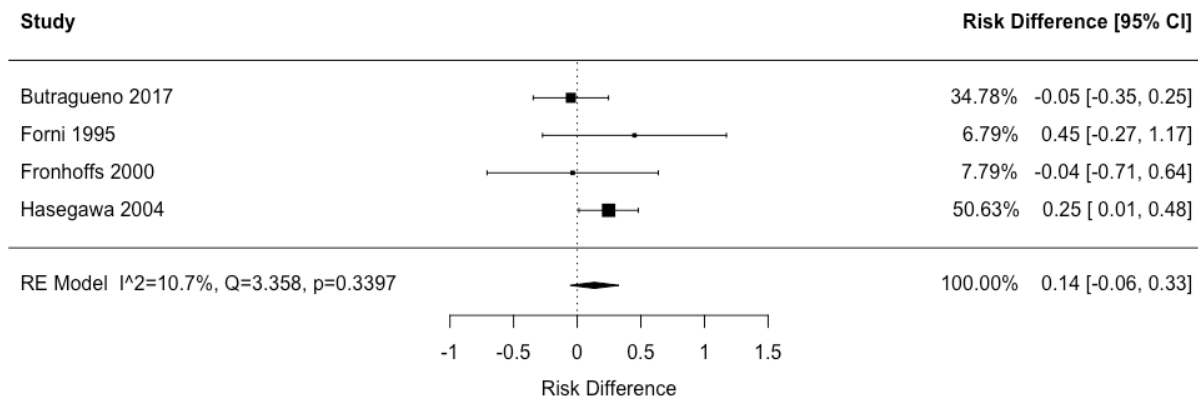

12. Hemodialysis: yes vs no (reference)

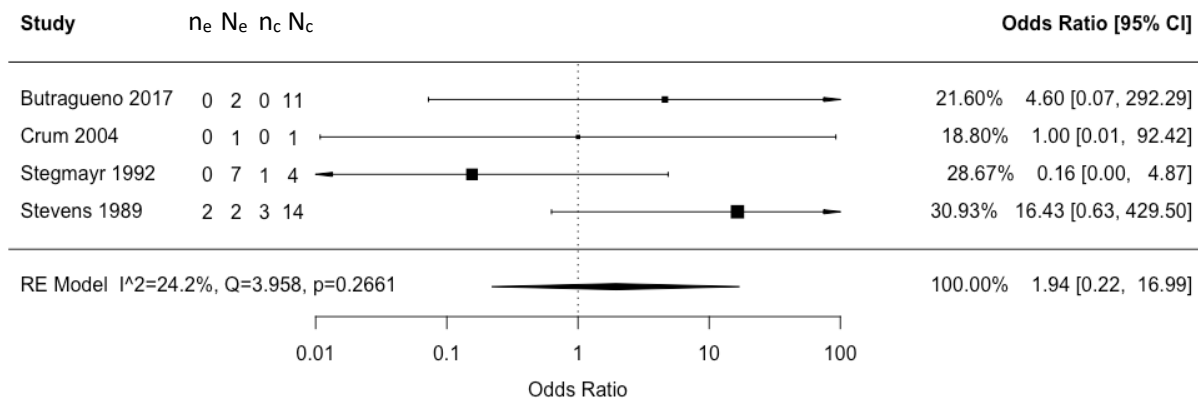

## ICU admission

This note pertains to meta-analyses of the outcome ICU admission that include the study Stegmayr 1992. For this study, 10 of 11 STSS patients were admitted to the ICU. Despite no explicit mention of which one patient was not admitted to the ICU, our interpretation of the clinical profiles and patient-level data allowed us to deduce that patient 1 likely did not require ICU admission. We reached out to the corresponding author to confirm if our interpretation was correct, but did not receive a response.

### 1. Sex: male vs female (reference)

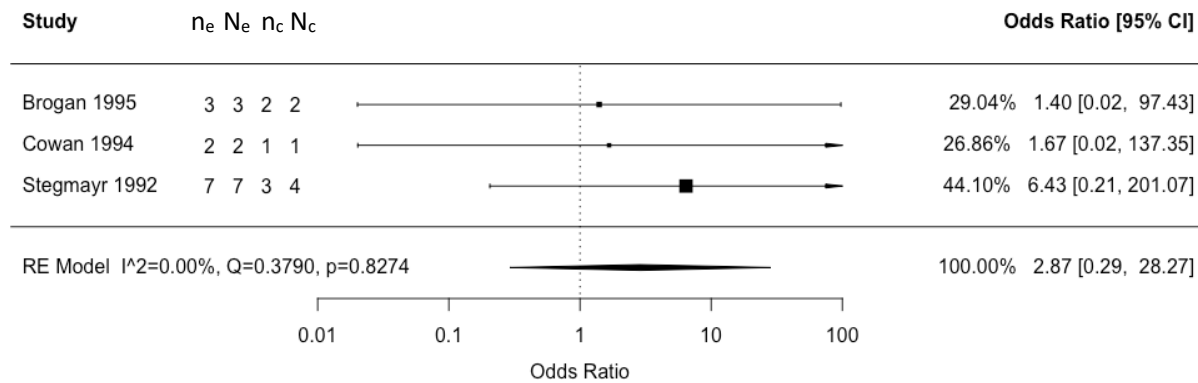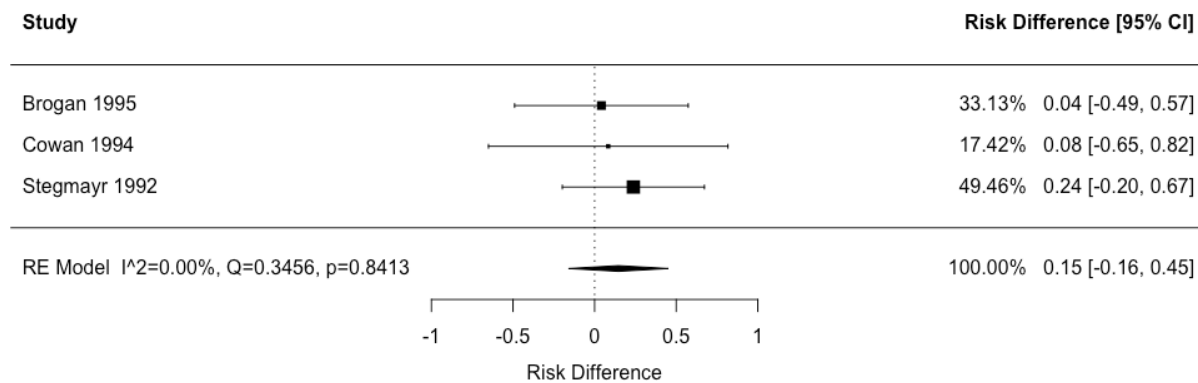

2. Any antibiotic: yes vs no (reference)

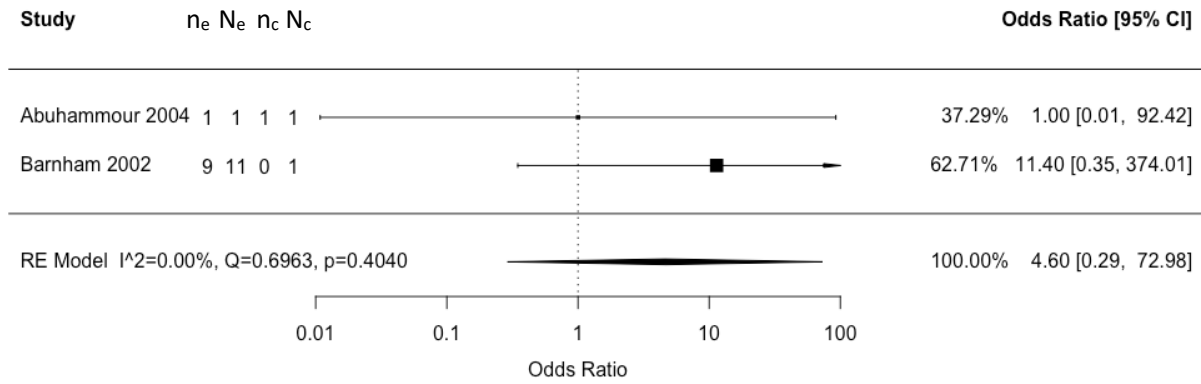

3. Necrotizing fasciitis: yes vs no (reference)

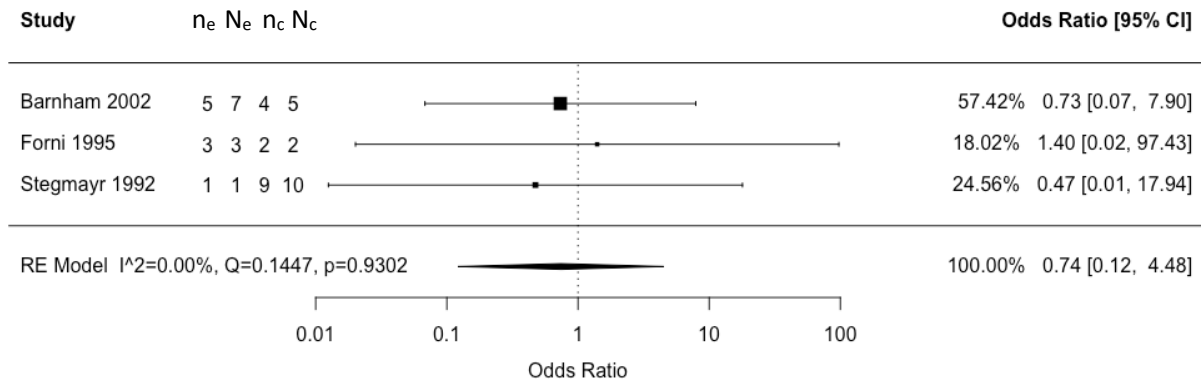

## 4. NSAIDs: yes vs no (reference)

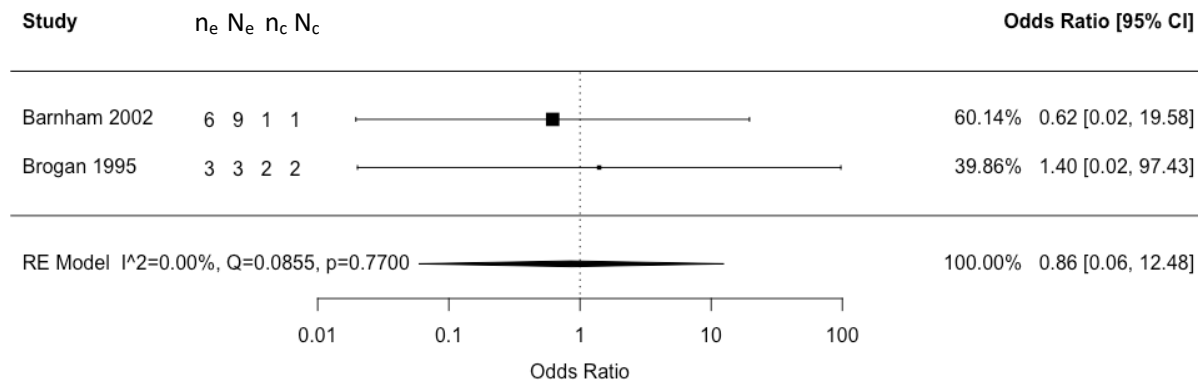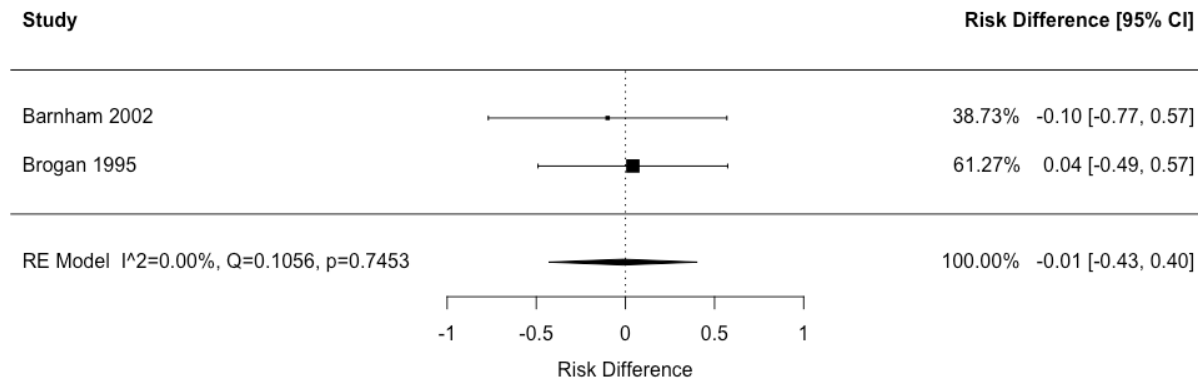

## 5. IVIG in all STSS patients: yes vs no (reference)

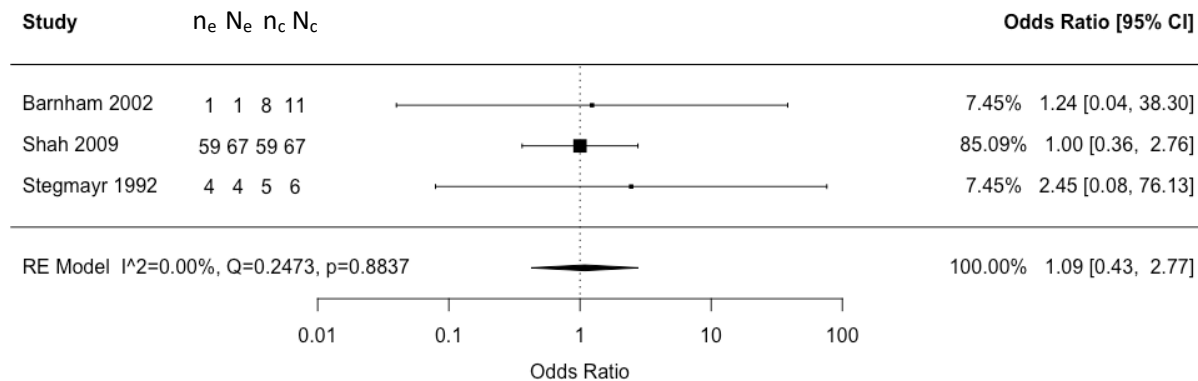

6. Hemodialysis: yes vs no (reference)

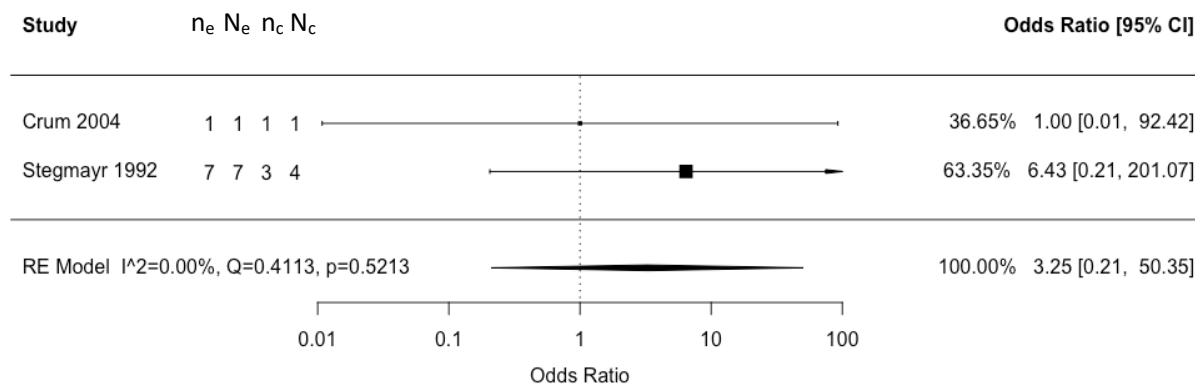

peer review only

## Clinical cure or improvement

### 1. Sex: male vs female (reference)

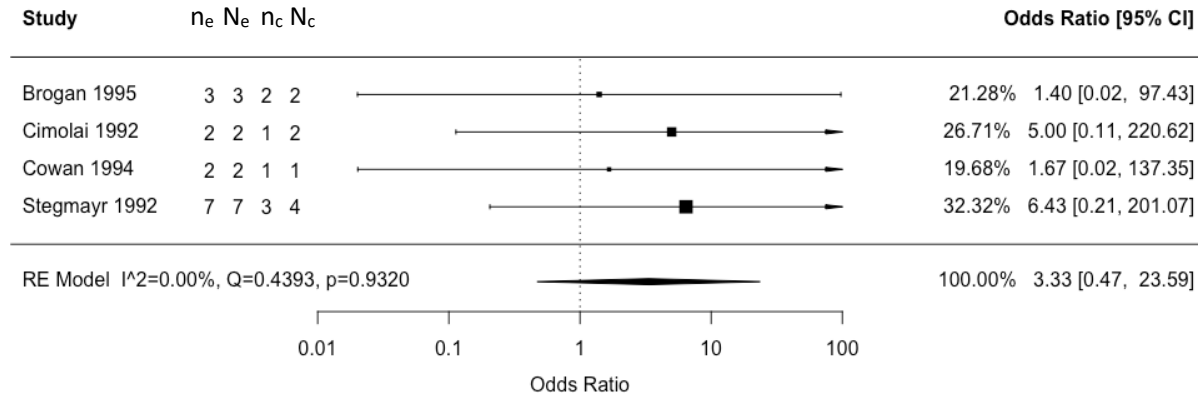

### 2. IVIG in all STSS patients: yes vs no (reference)

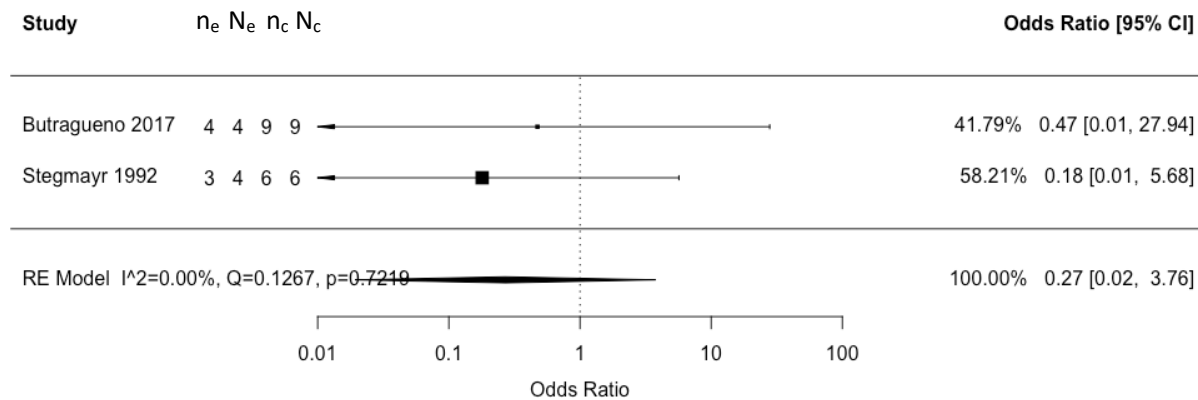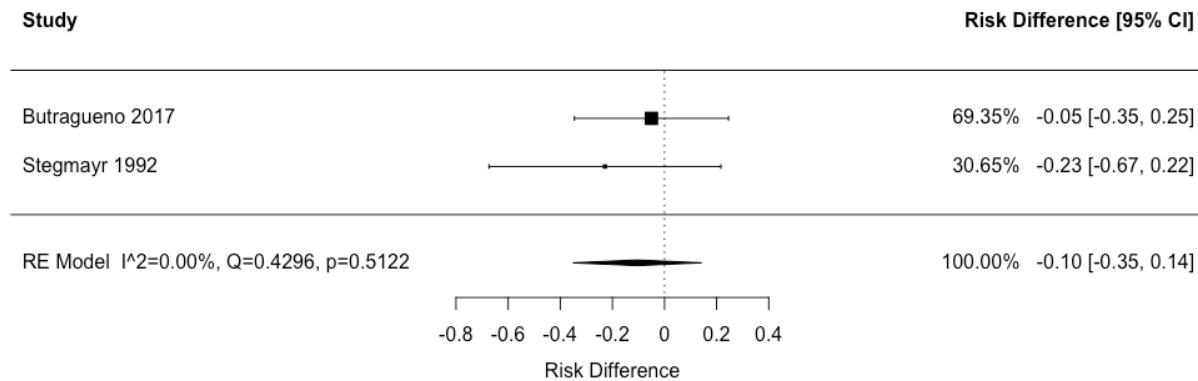

3. Necrotizing fasciitis: yes vs no (reference)

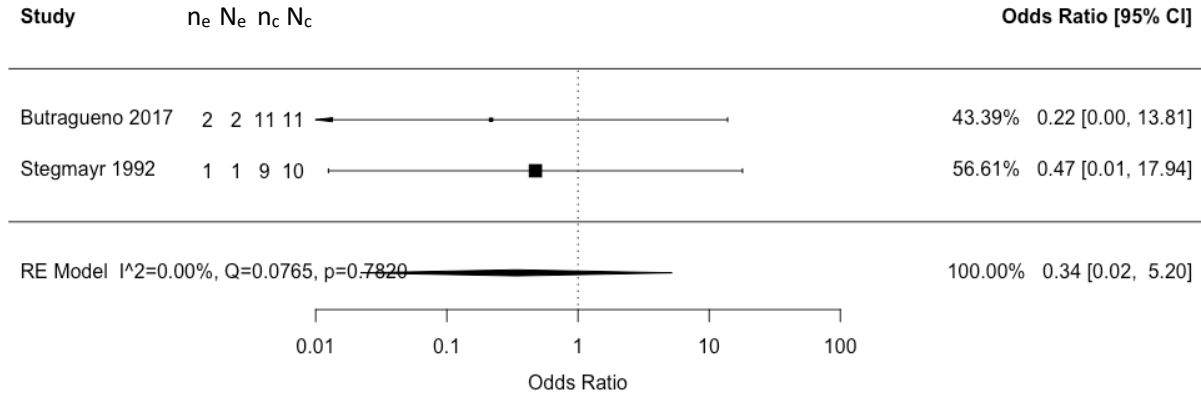

4. Hemodialysis: yes vs no (reference)

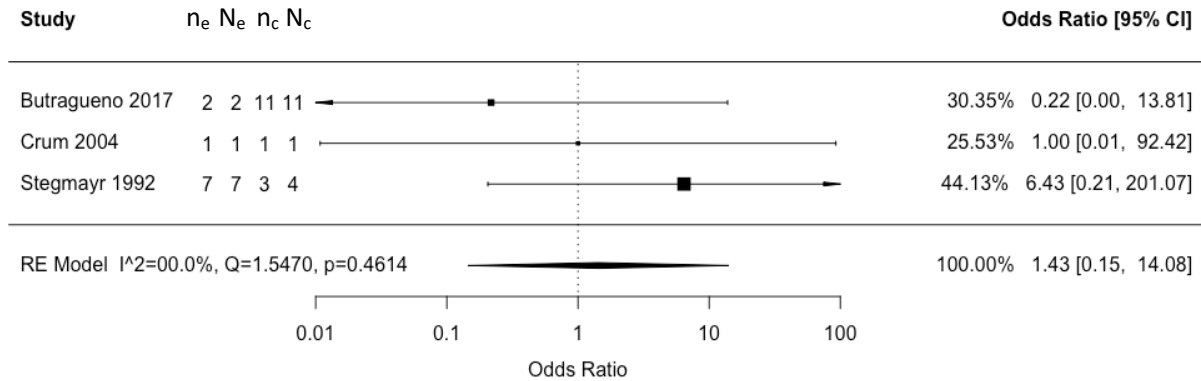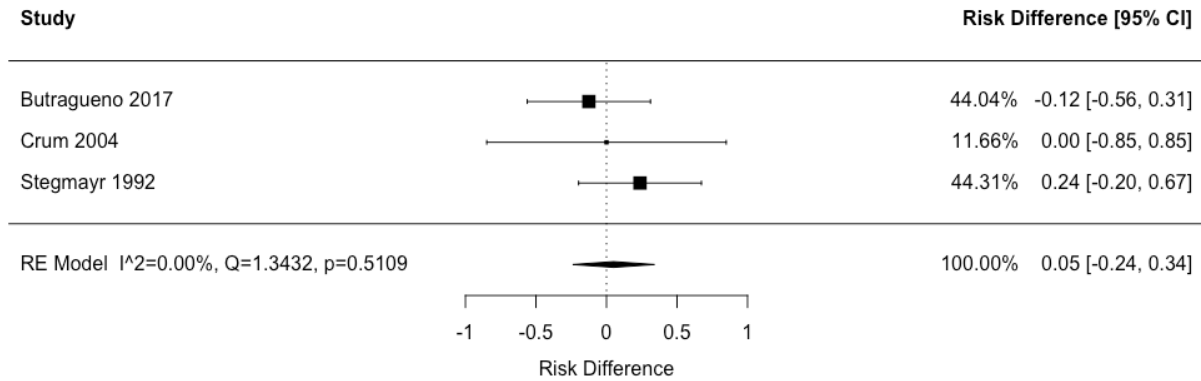

Mechanical ventilation

1. Sex: male vs female (reference)

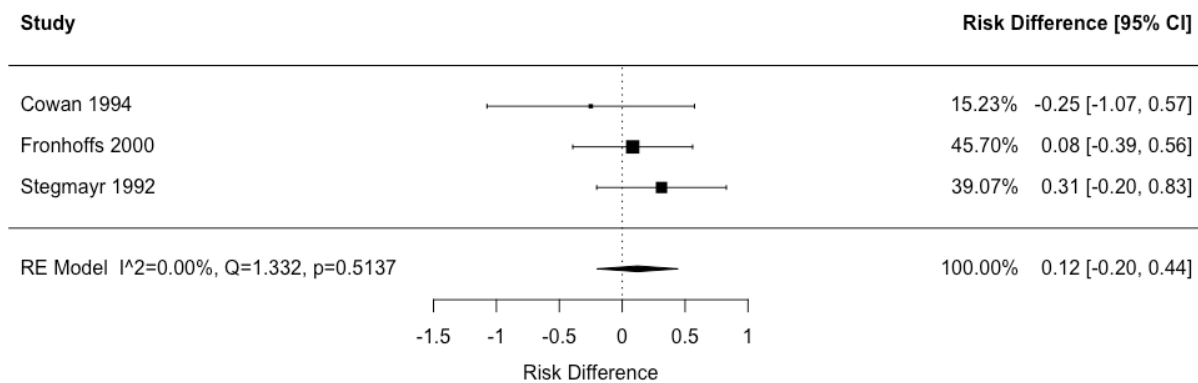

2. Acute renal failure: yes vs no (reference)





3. IVIG in all STSS patients: yes vs no (reference)

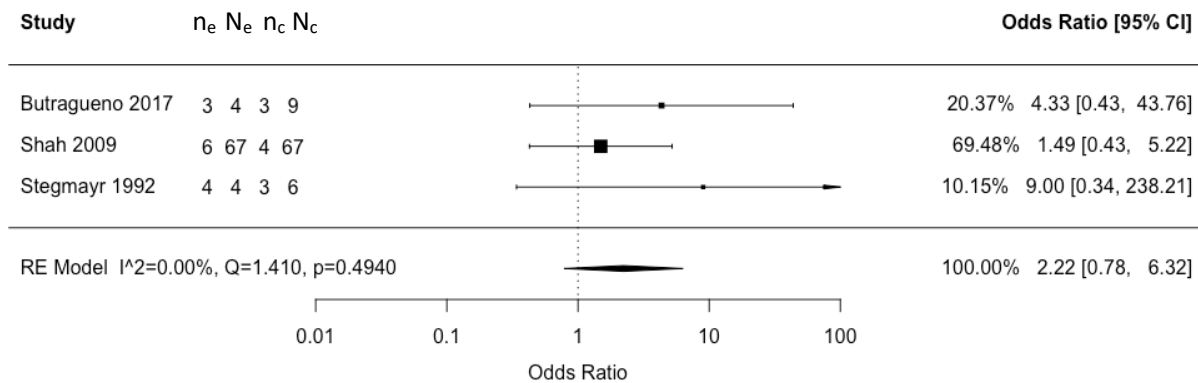

4. Necrotizing fasciitis: yes vs no (reference)

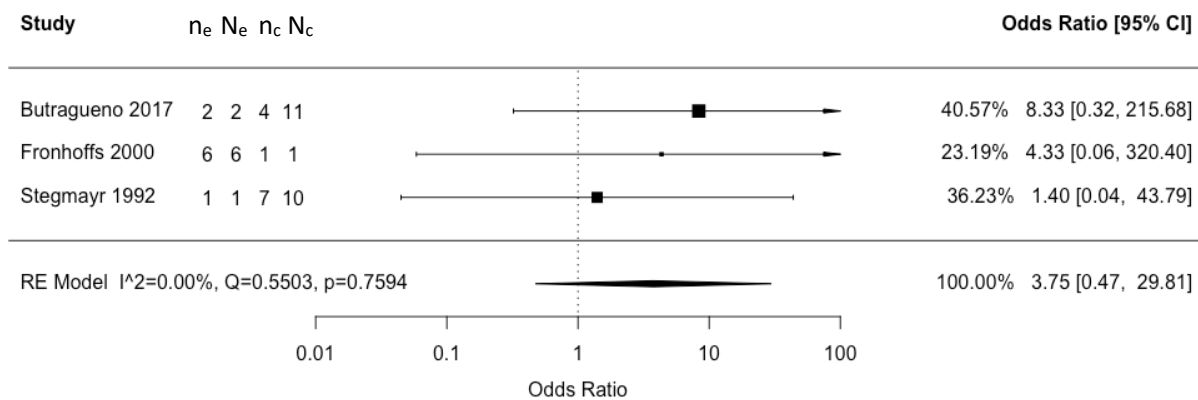

5. Hemodialysis: yes vs no (reference)

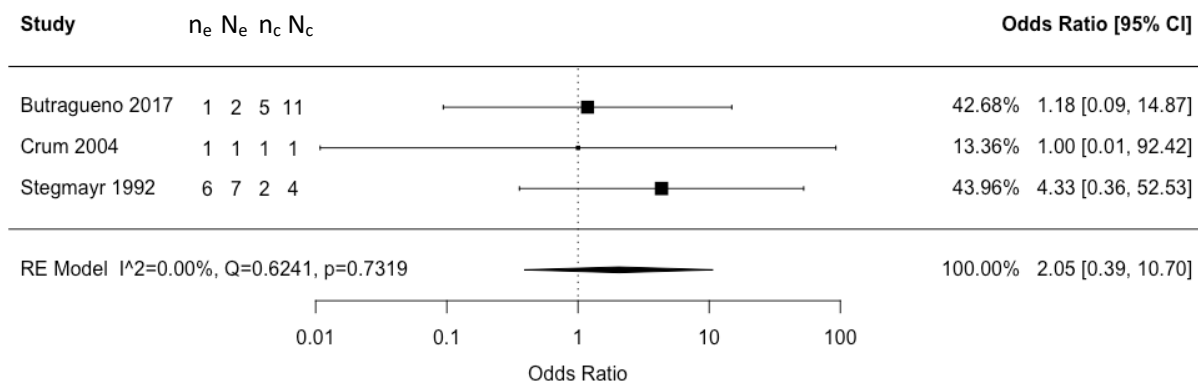

Hospital length-of-stay

1. IVIG: yes vs no (reference)



ICU length-of-stay

1. IVIG: yes vs no (reference)



## Description of studies ineligible for meta-analysis by outcome

### Mortality

| Prognostic factor of interest        | N reporting | N analyzed | Reasons for exclusion from meta-analysis                                                                                                                      |
|--------------------------------------|-------------|------------|---------------------------------------------------------------------------------------------------------------------------------------------------------------|
| acute renal failure                  | 4           | 4          |                                                                                                                                                               |
| age                                  | 28          | 5          | n=17 case-series with <10 patients, precluding the aggregation of patient-level data; n=6 study population consisted of patients all within same age category |
| antibiotic                           | 3           | 3          |                                                                                                                                                               |
| clindamycin                          | 4           | 4          |                                                                                                                                                               |
| early hypotension                    | 0           | 0          |                                                                                                                                                               |
| emmtype                              | 7           | 0          | n=7 variability in reporting of molecular characteristics and comparators                                                                                     |
| hemodialysis                         | 4           | 4          |                                                                                                                                                               |
| immunocompromised                    | 5           | 4          | n=1 insufficient data for meta-analysis (only p value reported)                                                                                               |
| IVIG in all STSS patients            | 9           | 9          |                                                                                                                                                               |
| IVIG in clindamycin-treated patients | 6           | 6          |                                                                                                                                                               |
| NF                                   | 10          | 10         |                                                                                                                                                               |
| NSAIDs                               | 4           | 4          |                                                                                                                                                               |
| sex                                  | 12          | 12         |                                                                                                                                                               |
| timetoantibiotic                     | 1           | 0          | Meta-analysis precluded with only one study                                                                                                                   |

## (P)ICU admission

| Prognostic factor of interest        | N reporting | N analyzed | Reasons for exclusion from meta-analysis                                                                                                                                                                                                 |
|--------------------------------------|-------------|------------|------------------------------------------------------------------------------------------------------------------------------------------------------------------------------------------------------------------------------------------|
| acute renal failure                  | 1           | 0          | Meta-analysis precluded with only one study                                                                                                                                                                                              |
| age                                  | 9           | 0          | n=5 case-series with <10 patients, precluding the aggregation of patient-level data; n=3 study population consisted of patients all within same age category; n=1 eligible for analysis, but meta-analysis precluded with only one study |
| antibiotic                           | 2           | 2          |                                                                                                                                                                                                                                          |
| clindamycin                          | 1           | 0          | Meta-analysis precluded with only one study                                                                                                                                                                                              |
| early hypotension                    | 0           | 0          |                                                                                                                                                                                                                                          |
| emctype                              | 2           | 0          | n=2 variability in reporting of molecular characteristics and comparators                                                                                                                                                                |
| hemodialysis                         | 2           | 2          |                                                                                                                                                                                                                                          |
| immunocompromised                    | 1           | 0          | Meta-analysis precluded with only one study                                                                                                                                                                                              |
| IVIG in all STSS patients            | 3           | 3          |                                                                                                                                                                                                                                          |
| IVIG in clindamycin-treated patients | 0           | 0          |                                                                                                                                                                                                                                          |
| NF                                   | 3           | 3          |                                                                                                                                                                                                                                          |
| NSAIDs                               | 2           | 2          |                                                                                                                                                                                                                                          |
| sex                                  | 3           | 3          |                                                                                                                                                                                                                                          |
| timetoantibiotic                     | 0           | 0          |                                                                                                                                                                                                                                          |

## Clinical cure or improvement

| Prognostic factor of interest        | N reporting | N analyzed | Reasons for exclusion from meta-analysis                                                                                                                     |
|--------------------------------------|-------------|------------|--------------------------------------------------------------------------------------------------------------------------------------------------------------|
| acute renal failure                  | 1           | 0          | Meta-analysis precluded with only one study                                                                                                                  |
| age                                  | 8           | 0          | n=6 case-series with <10 patients, precluding the aggregation of patient-level data; n=2 study population consisted of patients all within same age category |
| antibiotic                           | 1           | 0          | Meta-analysis precluded with only one study                                                                                                                  |
| clindamycin                          | 1           | 0          | Meta-analysis precluded with only one study                                                                                                                  |
| earlyhypotension                     | 0           | 0          |                                                                                                                                                              |
| emctype                              | 0           | 0          |                                                                                                                                                              |
| hemodialysis                         | 3           | 3          |                                                                                                                                                              |
| immunocompromised                    | 0           | 0          |                                                                                                                                                              |
| IVIG in all STSS patients            | 2           | 2          |                                                                                                                                                              |
| IVIG in clindamycin-treated patients | 0           | 0          |                                                                                                                                                              |
| NF                                   | 2           | 2          |                                                                                                                                                              |
| NSAIDs                               | 1           | 0          | Meta-analysis precluded with only one study                                                                                                                  |
| sex                                  | 4           | 4          |                                                                                                                                                              |
| timetoantibiotic                     | 0           | 0          |                                                                                                                                                              |

## Mechanical ventilation

| Prognostic factor of interest        | N reporting | N analyzed | Reasons for exclusion from meta-analysis                                                                                                                     |
|--------------------------------------|-------------|------------|--------------------------------------------------------------------------------------------------------------------------------------------------------------|
| acute renal failure                  | 2           | 2          |                                                                                                                                                              |
| age                                  | 5           | 0          | n=3 case-series with <10 patients, precluding the aggregation of patient-level data; n=2 study population consisted of patients all within same age category |
| antibiotic                           | 0           | 0          |                                                                                                                                                              |
| clindamycin                          | 1           | 0          | Meta-analysis precluded with only one study                                                                                                                  |
| earlyhypotension                     | 0           | 0          |                                                                                                                                                              |
| emctype                              | 0           | 0          |                                                                                                                                                              |
| hemodialysis                         | 3           | 3          |                                                                                                                                                              |
| immunocompromised                    | 1           | 0          | Meta-analysis precluded with only one study                                                                                                                  |
| IVIG in all STSS patients            | 3           | 3          |                                                                                                                                                              |
| IVIG in clindamycin-treated patients | 0           | 0          |                                                                                                                                                              |
| NF                                   | 3           | 3          |                                                                                                                                                              |
| NSAIDs                               | 1           | 0          | Meta-analysis precluded with only one study                                                                                                                  |
| sex                                  | 3           | 3          |                                                                                                                                                              |
| timetoantibiotic                     | 0           | 0          |                                                                                                                                                              |

## Hospital length-of-stay

| Prognostic factor of interest        | N reporting | N analyzed | Reasons for exclusion from meta-analysis                                            |
|--------------------------------------|-------------|------------|-------------------------------------------------------------------------------------|
| acute renal failure                  | 0           | 0          |                                                                                     |
| age                                  | 2           | 0          | n=2 case-series with <10 patients, precluding the aggregation of patient-level data |
| antibiotic                           | 0           | 0          |                                                                                     |
| clindamycin                          | 0           | 0          |                                                                                     |
| early hypotension                    | 0           | 0          |                                                                                     |
| emctype                              | 0           | 0          |                                                                                     |
| hemodialysis                         | 0           | 0          |                                                                                     |
| immunocompromised                    | 0           | 0          |                                                                                     |
| IVIG in all STSS patients            | 3           | 3          |                                                                                     |
| IVIG in clindamycin-treated patients | 0           | 0          |                                                                                     |
| NF                                   | 0           | 0          |                                                                                     |
| NSAIDs                               | 1           | 0          | Meta-analysis precluded with only one study                                         |
| sex                                  | 1           | 0          | Meta-analysis precluded with only one study                                         |
| timetoantibiotic                     | 0           | 0          |                                                                                     |

## Duration of mechanical ventilation

| Prognostic factor of interest        | N reporting | N analyzed | Reasons for exclusion from meta-analysis    |
|--------------------------------------|-------------|------------|---------------------------------------------|
| acute renal failure                  | 0           | 0          |                                             |
| age                                  | 0           | 0          |                                             |
| antibiotic                           | 0           | 0          |                                             |
| clindamycin                          | 0           | 0          |                                             |
| early hypotension                    | 0           | 0          |                                             |
| emctype                              | 0           | 0          |                                             |
| hemodialysis                         | 0           | 0          |                                             |
| immunocompromised                    | 0           | 0          |                                             |
| IVIG in all STSS patients            | 1           | 0          | Meta-analysis precluded with only one study |
| IVIG in clindamycin-treated patients | 0           | 0          |                                             |
| NF                                   | 0           | 0          |                                             |
| NSAIDs                               | 0           | 0          |                                             |
| sex                                  | 0           | 0          |                                             |
| timetoantibiotic                     | 0           | 0          |                                             |

## ICU length-of-stay

| Prognostic factor of interest        | N reporting | N analyzed | Reasons for exclusion from meta-analysis                                                                                                                     |
|--------------------------------------|-------------|------------|--------------------------------------------------------------------------------------------------------------------------------------------------------------|
| acute renal failure                  | 0           | 0          |                                                                                                                                                              |
| age                                  | 3           | 0          | n=2 case-series with <10 patients, precluding the aggregation of patient-level data; n=1 study population consisted of patients all within same age category |
| antibiotic                           | 0           | 0          |                                                                                                                                                              |
| clindamycin                          | 1           | 0          | Meta-analysis precluded with only one study                                                                                                                  |
| early hypotension                    | 0           | 0          |                                                                                                                                                              |
| emctype                              | 0           | 0          |                                                                                                                                                              |
| hemodialysis                         | 0           | 0          |                                                                                                                                                              |
| immunocompromised                    | 0           | 0          |                                                                                                                                                              |
| IVIG in all STSS patients            | 2           | 2          |                                                                                                                                                              |
| IVIG in clindamycin-treated patients | 0           | 0          |                                                                                                                                                              |
| NF                                   | 1           | 0          | Meta-analysis precluded with only one study                                                                                                                  |
| NSAIDs                               | 1           | 0          | Meta-analysis precluded with only one study                                                                                                                  |
| sex                                  | 2           | 0          | n=1 study with one person in each group > cannot calculate mean; n=1 meta-analysis precluded with only one study                                             |
| timetoantibiotic                     | 0           | 0          |                                                                                                                                                              |

## Change in SOFA score from baseline

| Prognostic factor of interest        | N reporting | N analyzed | Reasons for exclusion from meta-analysis    |
|--------------------------------------|-------------|------------|---------------------------------------------|
| acute renal failure                  | 0           | 0          |                                             |
| age                                  | 0           | 0          |                                             |
| antibiotic                           | 0           | 0          |                                             |
| clindamycin                          | 0           | 0          |                                             |
| early hypotension                    | 0           | 0          |                                             |
| emctype                              | 0           | 0          |                                             |
| hemodialysis                         | 0           | 0          |                                             |
| immunocompromised                    | 0           | 0          |                                             |
| IVIG in all STSS patients            | 1           | 0          | Meta-analysis precluded with only one study |
| IVIG in clindamycin-treated patients | 0           | 0          |                                             |
| NF                                   | 0           | 0          |                                             |
| NSAIDs                               | 0           | 0          |                                             |
| sex                                  | 0           | 0          |                                             |
| timetoantibiotic                     | 0           | 0          |                                             |

## Functional status

| Prognostic factor of interest        | N reporting | N analyzed | Reasons for exclusion from meta-analysis |
|--------------------------------------|-------------|------------|------------------------------------------|
| acute renal failure                  | 0           | 0          |                                          |
| age                                  | 0           | 0          |                                          |
| antibiotic                           | 0           | 0          |                                          |
| clindamycin                          | 0           | 0          |                                          |
| early hypotension                    | 0           | 0          |                                          |
| emctype                              | 0           | 0          |                                          |
| hemodialysis                         | 0           | 0          |                                          |
| immunocompromised                    | 0           | 0          |                                          |
| IVIG in all STSS patients            | 0           | 0          |                                          |
| IVIG in clindamycin-treated patients | 0           | 0          |                                          |
| NF                                   | 0           | 0          |                                          |
| NSAIDs                               | 0           | 0          |                                          |
| sex                                  | 0           | 0          |                                          |
| timetoantibiotic                     | 0           | 0          |                                          |



## Health related quality of life

| Prognostic factor of interest        | N reporting | N analyzed | Reasons for exclusion from meta-analysis |
|--------------------------------------|-------------|------------|------------------------------------------|
| acute renal failure                  | 0           | 0          |                                          |
| age                                  | 0           | 0          |                                          |
| antibiotic                           | 0           | 0          |                                          |
| clindamycin                          | 0           | 0          |                                          |
| early hypotension                    | 0           | 0          |                                          |
| emctype                              | 0           | 0          |                                          |
| hemodialysis                         | 0           | 0          |                                          |
| immunocompromised                    | 0           | 0          |                                          |
| IVIG in all STSS patients            | 0           | 0          |                                          |
| IVIG in clindamycin-treated patients | 0           | 0          |                                          |
| NF                                   | 0           | 0          |                                          |
| NSAIDs                               | 0           | 0          |                                          |
| sex                                  | 0           | 0          |                                          |
| timetoantibiotic                     | 0           | 0          |                                          |

## Cost

| Prognostic factor of interest        | N reporting | N analyzed | Reasons for exclusion from meta-analysis    |
|--------------------------------------|-------------|------------|---------------------------------------------|
| acute renal failure                  | 0           | 0          |                                             |
| age                                  | 0           | 0          |                                             |
| antibiotic                           | 0           | 0          |                                             |
| clindamycin                          | 0           | 0          |                                             |
| early hypotension                    | 0           | 0          |                                             |
| emctype                              | 0           | 0          |                                             |
| hemodialysis                         | 0           | 0          |                                             |
| immunocompromised                    | 0           | 0          |                                             |
| IVIG in all STSS patients            | 1           | 0          | Meta-analysis precluded with only one study |
| IVIG in clindamycin-treated patients | 0           | 0          |                                             |
| NF                                   | 0           | 0          |                                             |
| NSAIDs                               | 0           | 0          |                                             |
| sex                                  | 0           | 0          |                                             |
| timetoantibiotic                     | 0           | 0          |                                             |

## Time to mortality

| Prognostic factor of interest        | N reporting | N analyzed | Reasons for exclusion from meta-analysis                                                                         |
|--------------------------------------|-------------|------------|------------------------------------------------------------------------------------------------------------------|
| acute renal failure                  | 0           | 0          |                                                                                                                  |
| age                                  | 0           | 0          |                                                                                                                  |
| antibiotic                           | 0           | 0          |                                                                                                                  |
| clindamycin                          | 0           | 0          |                                                                                                                  |
| early hypotension                    | 0           | 0          |                                                                                                                  |
| emctype                              | 0           | 0          |                                                                                                                  |
| hemodialysis                         | 0           | 0          |                                                                                                                  |
| immunocompromised                    | 0           | 0          |                                                                                                                  |
| IVIG in all STSS patients            | 2           | 0          | n=1 study with one person in each group > cannot calculate mean; n=1 meta-analysis precluded with only one study |
| IVIG in clindamycin-treated patients | 2           | 0          | n=1 study with one person in each group > cannot calculate mean; n=1 meta-analysis precluded with only one study |
| NF                                   | 0           | 0          |                                                                                                                  |
| NSAIDs                               | 0           | 0          |                                                                                                                  |
| sex                                  | 0           | 0          |                                                                                                                  |
| timetoantibiotic                     | 0           | 0          |                                                                                                                  |

## Time to clinical improvement or resolution of shock

| <b>Prognostic factor of interest</b> | <b>N reporting</b> | <b>N analyzed</b> | <b>Reasons for exclusion from meta-analysis</b> |
|--------------------------------------|--------------------|-------------------|-------------------------------------------------|
| acute renal failure                  | 0                  | 0                 |                                                 |
| age                                  | 0                  | 0                 |                                                 |
| antibiotic                           | 0                  | 0                 |                                                 |
| clindamycin                          | 0                  | 0                 |                                                 |
| early hypotension                    | 0                  | 0                 |                                                 |
| emctype                              | 0                  | 0                 |                                                 |
| hemodialysis                         | 0                  | 0                 |                                                 |
| immunocompromised                    | 0                  | 0                 |                                                 |
| IVIG in all STSS patients            | 1                  | 0                 | Meta-analysis precluded with only one study     |
| IVIG in clindamycin-treated patients | 1                  | 0                 | Meta-analysis precluded with only one study     |
| NF                                   | 0                  | 0                 |                                                 |
| NSAIDs                               | 0                  | 0                 |                                                 |
| sex                                  | 0                  | 0                 |                                                 |
| timetoantibiotic                     | 0                  | 0                 |                                                 |

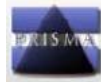

## PRISMA 2020 Checklist

| Section and Topic             | Item # | Checklist item                                                                                                                                                                                                                                                                                       | Location where item is reported |
|-------------------------------|--------|------------------------------------------------------------------------------------------------------------------------------------------------------------------------------------------------------------------------------------------------------------------------------------------------------|---------------------------------|
| <b>TITLE</b>                  |        |                                                                                                                                                                                                                                                                                                      |                                 |
| Title                         | 1      | Identify the report as a systematic review.                                                                                                                                                                                                                                                          | 1                               |
| <b>ABSTRACT</b>               |        |                                                                                                                                                                                                                                                                                                      |                                 |
| Abstract                      | 2      | See the PRISMA 2020 for Abstracts checklist.                                                                                                                                                                                                                                                         | 2                               |
| <b>INTRODUCTION</b>           |        |                                                                                                                                                                                                                                                                                                      |                                 |
| Rationale                     | 3      | Describe the rationale for the review in the context of existing knowledge.                                                                                                                                                                                                                          | 4                               |
| Objectives                    | 4      | Provide an explicit statement of the objective(s) or question(s) the review addresses.                                                                                                                                                                                                               | 4                               |
| <b>METHODS</b>                |        |                                                                                                                                                                                                                                                                                                      |                                 |
| Eligibility criteria          | 5      | Specify the inclusion and exclusion criteria for the review and how studies were grouped for the syntheses.                                                                                                                                                                                          | 4-9                             |
| Information sources           | 6      | Specify all databases, registers, websites, organisations, reference lists and other sources searched or consulted to identify studies. Specify the date when each source was last searched or consulted.                                                                                            | 4-9                             |
| Search strategy               | 7      | Present the full search strategies for all databases, registers and websites, including any filters and limits used.                                                                                                                                                                                 | 4-9                             |
| Selection process             | 8      | Specify the methods used to decide whether a study met the inclusion criteria of the review, including how many reviewers screened each record and each report retrieved, whether they worked independently, and if applicable, details of automation tools used in the process.                     | 4-9                             |
| Data collection process       | 9      | Specify the methods used to collect data from reports, including how many reviewers collected data from each report, whether they worked independently, any processes for obtaining or confirming data from study investigators, and if applicable, details of automation tools used in the process. | 4-9                             |
| Data items                    | 10a    | List and define all outcomes for which data were sought. Specify whether all results that were compatible with each outcome domain in each study were sought (e.g. for all measures, time points, analyses), and if not, the methods used to decide which results to collect.                        | 4-9                             |
|                               | 10b    | List and define all other variables for which data were sought (e.g. participant and intervention characteristics, funding sources). Describe any assumptions made about any missing or unclear information.                                                                                         | 4-9                             |
| Study risk of bias assessment | 11     | Specify the methods used to assess risk of bias in the included studies, including details of the tool(s) used, how many reviewers assessed each study and whether they worked independently, and if applicable, details of automation tools used in the process.                                    | 4-9                             |
| Effect measures               | 12     | Specify for each outcome the effect measure(s) (e.g. risk ratio, mean difference) used in the synthesis or presentation of results.                                                                                                                                                                  | 4-9                             |
| Synthesis methods             | 13a    | Describe the processes used to decide which studies were eligible for each synthesis (e.g. tabulating the study intervention characteristics and comparing against the planned groups for each synthesis (item #5)).                                                                                 | 4-9                             |
|                               | 13b    | Describe any methods required to prepare the data for presentation or synthesis, such as handling of missing summary statistics, or data conversions.                                                                                                                                                | 4-9                             |
|                               | 13c    | Describe any methods used to tabulate or visually display results of individual studies and syntheses.                                                                                                                                                                                               | 4-9                             |
|                               | 13d    | Describe any methods used to synthesize results and provide a rationale for the choice(s). If meta-analysis was performed, describe the model(s), method(s) to identify the presence and extent of statistical heterogeneity, and software package(s) used.                                          | 4-9                             |
|                               | 13e    | Describe any methods used to explore possible causes of heterogeneity among study results (e.g. subgroup analysis, meta-regression).                                                                                                                                                                 | 4-9                             |
|                               | 13f    | Describe any sensitivity analyses conducted to assess robustness of the synthesized results.                                                                                                                                                                                                         | 4-9                             |
| Reporting bias assessment     | 14     | Describe any methods used to assess risk of bias due to missing results in a synthesis (arising from reporting biases).                                                                                                                                                                              | 4-9                             |
| Certainty                     | 15     | Describe any methods used to assess certainty (or confidence) in the body of evidence for an outcome.                                                                                                                                                                                                | 4-9                             |

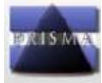

## PRISMA 2020 Checklist

| Section and Topic                              | Item # | Checklist item                                                                                                                                                                                                                                                                       | Location where item is reported |
|------------------------------------------------|--------|--------------------------------------------------------------------------------------------------------------------------------------------------------------------------------------------------------------------------------------------------------------------------------------|---------------------------------|
| assessment                                     |        |                                                                                                                                                                                                                                                                                      |                                 |
| <b>RESULTS</b>                                 |        |                                                                                                                                                                                                                                                                                      |                                 |
| Study selection                                | 16a    | Describe the results of the search and selection process, from the number of records identified in the search to the number of studies included in the review, ideally using a flow diagram.                                                                                         | 9-17                            |
|                                                | 16b    | Cite studies that might appear to meet the inclusion criteria, but which were excluded, and explain why they were excluded.                                                                                                                                                          | 9-17                            |
| Study characteristics                          | 17     | Cite each included study and present its characteristics.                                                                                                                                                                                                                            | 9-17                            |
| Risk of bias in studies                        | 18     | Present assessments of risk of bias for each included study.                                                                                                                                                                                                                         | 9-17                            |
| Results of individual studies                  | 19     | For all outcomes, present, for each study: (a) summary statistics for each group (where appropriate) and (b) an effect estimate and its precision (e.g. confidence/credible interval), ideally using structured tables or plots.                                                     | 9-17                            |
| Results of syntheses                           | 20a    | For each synthesis, briefly summarise the characteristics and risk of bias among contributing studies.                                                                                                                                                                               | 9-17                            |
|                                                | 20b    | Present results of all statistical syntheses conducted. If meta-analysis was done, present for each the summary estimate and its precision (e.g. confidence/credible interval) and measures of statistical heterogeneity. If comparing groups, describe the direction of the effect. | 9-17                            |
|                                                | 20c    | Present results of all investigations of possible causes of heterogeneity among study results.                                                                                                                                                                                       | 9-17                            |
|                                                | 20d    | Present results of all sensitivity analyses conducted to assess the robustness of the synthesized results.                                                                                                                                                                           | 9-17                            |
| Reporting biases                               | 21     | Present assessments of risk of bias due to missing results (arising from reporting biases) for each synthesis assessed.                                                                                                                                                              | 9-17                            |
| Certainty of evidence                          | 22     | Present assessments of certainty (or confidence) in the body of evidence for each outcome assessed.                                                                                                                                                                                  | 9-17                            |
| <b>DISCUSSION</b>                              |        |                                                                                                                                                                                                                                                                                      |                                 |
| Discussion                                     | 23a    | Provide a general interpretation of the results in the context of other evidence.                                                                                                                                                                                                    | 17-19                           |
|                                                | 23b    | Discuss any limitations of the evidence included in the review.                                                                                                                                                                                                                      | 17-19                           |
|                                                | 23c    | Discuss any limitations of the review processes used.                                                                                                                                                                                                                                | 17-19                           |
|                                                | 23d    | Discuss implications of the results for practice, policy, and future research.                                                                                                                                                                                                       | 17-19                           |
| <b>OTHER INFORMATION</b>                       |        |                                                                                                                                                                                                                                                                                      |                                 |
| Registration and protocol                      | 24a    | Provide registration information for the review, including register name and registration number, or state that the review was not registered.                                                                                                                                       | 4                               |
|                                                | 24b    | Indicate where the review protocol can be accessed, or state that a protocol was not prepared.                                                                                                                                                                                       | 4                               |
|                                                | 24c    | Describe and explain any amendments to information provided at registration or in the protocol.                                                                                                                                                                                      | 4                               |
| Support                                        | 25     | Describe sources of financial or non-financial support for the review, and the role of the funders or sponsors in the review.                                                                                                                                                        | 20                              |
| Competing interests                            | 26     | Declare any competing interests of review authors.                                                                                                                                                                                                                                   | 20                              |
| Availability of data, code and other materials | 27     | Report which of the following are publicly available and where they can be found: template data collection forms; data extracted from included studies; data used for all analyses; analytic code; any other materials used in the review.                                           | 21                              |

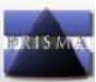

# PRISMA 2020 Checklist

- 1
- 2
- 3
- 4
- 5
- 6
- 7
- 8
- 9
- 10
- 11
- 12
- 13
- 14
- 15
- 16
- 17
- 18
- 19
- 20
- 21
- 22
- 23
- 24
- 25
- 26
- 27
- 28
- 29
- 30
- 31
- 32
- 33
- 34
- 35
- 36
- 37
- 38
- 39
- 40
- 41
- 42
- 43
- 44
- 45
- 46
- 47

10.1136/bmj.n71

For more information, visit: <http://www.prisma-statement.org/>

For peer review only

## MOOSE (Meta-analyses Of Observational Studies in Epidemiology) Checklist

A reporting checklist for Authors, Editors, and Reviewers of Meta-analyses of Observational Studies. You must report the page number in your manuscript where you consider each of the items listed in this checklist. If you have not included this information, either revise your manuscript accordingly before submitting or note N/A.

| Reporting Criteria                                                                                              | Reported (Yes/No) | Reported on Page No. |
|-----------------------------------------------------------------------------------------------------------------|-------------------|----------------------|
| <b>Reporting of Background</b>                                                                                  |                   |                      |
| Problem definition                                                                                              |                   |                      |
| Hypothesis statement                                                                                            |                   |                      |
| Description of Study Outcome(s)                                                                                 |                   |                      |
| Type of exposure or intervention used                                                                           |                   |                      |
| Type of study design used                                                                                       |                   |                      |
| Study population                                                                                                |                   |                      |
| <b>Reporting of Search Strategy</b>                                                                             |                   |                      |
| Qualifications of searchers (eg, librarians and investigators)                                                  |                   |                      |
| Search strategy, including time period included in the synthesis and keywords                                   |                   |                      |
| Effort to include all available studies, including contact with authors                                         |                   |                      |
| Databases and registries searched                                                                               |                   |                      |
| Search software used, name and version, including special features used (eg, explosion)                         |                   |                      |
| Use of hand searching (eg, reference lists of obtained articles)                                                |                   |                      |
| List of citations located and those excluded, including justification                                           |                   |                      |
| Method for addressing articles published in languages other than English                                        |                   |                      |
| Method of handling abstracts and unpublished studies                                                            |                   |                      |
| Description of any contact with authors                                                                         |                   |                      |
| <b>Reporting of Methods</b>                                                                                     |                   |                      |
| Description of relevance or appropriateness of studies assembled for assessing the hypothesis to be tested      |                   |                      |
| Rationale for the selection and coding of data (eg, sound clinical principles or convenience)                   |                   |                      |
| Documentation of how data were classified and coded (eg, multiple raters, blinding, and interrater reliability) |                   |                      |
| Assessment of confounding (eg, comparability of cases and controls in studies where appropriate)                |                   |                      |

| Reporting Criteria                                                                                                                                                                                                                                                           | Reported (Yes/No) | Reported on Page No. |
|------------------------------------------------------------------------------------------------------------------------------------------------------------------------------------------------------------------------------------------------------------------------------|-------------------|----------------------|
| Assessment of study quality, including blinding of quality assessors; stratification or regression on possible predictors of study results                                                                                                                                   |                   |                      |
| Assessment of heterogeneity                                                                                                                                                                                                                                                  |                   |                      |
| Description of statistical methods (eg, complete description of fixed or random effects models, justification of whether the chosen models account for predictors of study results, dose-response models, or cumulative meta-analysis) in sufficient detail to be replicated |                   |                      |
| Provision of appropriate tables and graphics                                                                                                                                                                                                                                 |                   |                      |
| <b>Reporting of Results</b>                                                                                                                                                                                                                                                  |                   |                      |
| Table giving descriptive information for each study included                                                                                                                                                                                                                 |                   |                      |
| Results of sensitivity testing (eg, subgroup analysis)                                                                                                                                                                                                                       |                   |                      |
| Indication of statistical uncertainty of findings                                                                                                                                                                                                                            |                   |                      |
| <b>Reporting of Discussion</b>                                                                                                                                                                                                                                               |                   |                      |
| Quantitative assessment of bias (eg, publication bias)                                                                                                                                                                                                                       |                   |                      |
| Justification for exclusion (eg, exclusion of non-English-language citations)                                                                                                                                                                                                |                   |                      |
| Assessment of quality of included studies                                                                                                                                                                                                                                    |                   |                      |
| <b>Reporting of Conclusions</b>                                                                                                                                                                                                                                              |                   |                      |
| Consideration of alternative explanations for observed results                                                                                                                                                                                                               |                   |                      |
| Generalization of the conclusions (ie, appropriate for the data presented and within the domain of the literature review)                                                                                                                                                    |                   |                      |
| Guidelines for future research                                                                                                                                                                                                                                               |                   |                      |
| Disclosure of funding source                                                                                                                                                                                                                                                 |                   |                      |

Once you have completed this checklist, please save a copy and upload it as part of your submission. DO NOT include this checklist as part of the main manuscript document. It must be uploaded as a separate file.
